# Supplementary material for: Respiratory syncytial virus genotypes NA1, ON1, and BA9 are prevalent in Thailand, 2012–2015
Source: PeerJ journal article supplement (doi:10.7717/peerj.3970), 2017-10-27
Supplement: GenBank_KY327937-KY328148_.pdf [file GenBank_KY327937-KY328148_.pdf]

GenBank flat file:

LOCUS KY327937 600 bp cRNA linear VRL 13-DEC-2016

DEFINITION Human respiratory syncytial virus A isolate TH-CU446/2012  
attachment glycoprotein gene, partial cds.

ACCESSION KY327937

VERSION KY327937

KEYWORDS .

SOURCE Human respiratory syncytial virus A

ORGANISM Human respiratory syncytial virus A

Viruses; ssRNA viruses; ssRNA negative-strand viruses;  
Mononegavirales; Pneumoviridae; Orthopneumovirus.

REFERENCE 1 (bases 1 to 600)

AUTHORS Thongpan,I., Mauleekoonphairoj,J., Vichiwattana,P., Korkong,S.,  
Vongpunsawad,S. and Poovorawan,Y.

TITLE Molecular Characterization of Respiratory Syncytial Virus in  
Thailand, 2012-2015

JOURNAL Unpublished

REFERENCE 2 (bases 1 to 600)

AUTHORS Thongpan,I., Mauleekoonphairoj,J., Vichiwattana,P., Korkong,S.,  
Vongpunsawad,S. and Poovorawan,Y.

TITLE Direct Submission

JOURNAL Submitted (13-DEC-2016) Department of Pediatrics, Center of  
Excellence in Clinical Virology, Faculty of Medicine, Chulalongkorn  
University, Bangkok 10330, Thailand

COMMENT ##Assembly-Data-START##

Assembly Method :: DNASTAR-Lasergene v. 6  
Sequencing Technology :: Sanger dideoxy sequencing  
##Assembly-Data-END##

FEATURES Location/Qualifiers

source 1..600

/organism="Human respiratory syncytial virus A"  
/mol\_type="viral cRNA"  
/isolate="TH-CU446/2012"  
/host="Homo sapiens"  
/db\_xref="taxon:208893"  
/country="Thailand"  
/collection\_date="01-Sep-2012"  
/note="group: A"

CDS <1..600

/note="G protein"  
/codon\_start=1  
/product="attachment glycoprotein"  
/protein\_id="APY20278"  
/translation="ISFSNLSGTTTSQSTTILASITPSAESTPQSTTVKIKNTTTTQIL  
PSKPTTKQRQNKPKQNKPNDFHFEVFNFPVPCISCSNNPTCWAICKRIPNKKPGKTTT  
KPTKKPTLTKTTKDKPKPQTTSKEVLTTKPTKPTINTTKTNIRTTLLTSNTTENPEH  
TSQEEILHSTTSEGYPSPSQVHTTSEHLSQSPSSSNTTK"

ORIGIN

1 atcagcttct ccaatctgtc cggaactaca tcacaatcca ccaccatact agcttcaata  
61 acaccaagtg ctgagtcaac cccacaatcc acaacagtca agatcaaaaa cacaacaaca  
121 acccaaatat taccagcaa acccaactaca aaacaacgcc aaaataaacc acaaaacaaa  
181 cccaacaatg atttctact tgaagtgttc aattttgtac cctgcagcat atgcagcaac

241 aatccaacct gctgggacct ctgcaagaga ataccaaca aaaaacctgg aaagaaaacc  
301 accaccaagc ccacaaaaaa accaacctc aagacaacca aaaaagatcc caaacctcaa  
361 accacaaaat caaaggaagt actcaccacc aagcctacag aaaagccaac catcaacacc  
421 accaaaaaca acatcagaac tacactgctc actccaaca ccacagaaaa tccagaacac  
481 acaagtcaag aggaaatcct ccaactcaacc acctcgaag gctatccaag cccatcacia  
541 gtccatacaa catccgagca cctatcacia tetccatctt catccaacac aacaaaatga

//

LOCUS KY327938 600 bp cRNA linear VRL 13-DEC-2016

DEFINITION Human respiratory syncytial virus A isolate TH-CU401/2012  
attachment glycoprotein gene, partial cds.

ACCESSION KY327938

VERSION KY327938

KEYWORDS .

SOURCE Human respiratory syncytial virus A

ORGANISM Human respiratory syncytial virus A

Viruses; ssRNA viruses; ssRNA negative-strand viruses;  
Mononegavirales; Pneumoviridae; Orthopneumovirus.

REFERENCE 1 (bases 1 to 600)

AUTHORS Thongpan,I., Mauleekoonphairoj,J., Vichiwattana,P., Korkong,S.,  
Vongpunsawad,S. and Poovorawan,Y.

TITLE Molecular Characterization of Respiratory Syncytial Virus in  
Thailand, 2012-2015

JOURNAL Unpublished

REFERENCE 2 (bases 1 to 600)

AUTHORS Thongpan,I., Mauleekoonphairoj,J., Vichiwattana,P., Korkong,S.,  
Vongpunsawad,S. and Poovorawan,Y.

TITLE Direct Submission

JOURNAL Submitted (13-DEC-2016) Department of Pediatrics, Center of  
Excellence in Clinical Virology, Faculty of Medicine, Chulalongkorn  
University, Bangkok 10330, Thailand

COMMENT ##Assembly-Data-START##

Assembly Method :: DNASTAR-Lasergene v. 6  
Sequencing Technology :: Sanger dideoxy sequencing  
##Assembly-Data-END##

FEATURES Location/Qualifiers

source 1..600

/organism="Human respiratory syncytial virus A"  
/mol\_type="viral cRNA"  
/isolate="TH-CU401/2012"  
/host="Homo sapiens"  
/db\_xref="taxon:208893"  
/country="Thailand"  
/collection\_date="01-Aug-2012"  
/note="group: A"

CDS <1..600

/note="G protein"  
/codon\_start=1  
/product="attachment glycoprotein"  
/protein\_id="APY20279"  
/translation="ISFSNLSGTTSQSTTILASITPSAESTPQSTTVKIKNTTTTQIL  
PSKPTTKQRQNKPNKPNNDFFHFEVFNFPVCSICSNPTCWAICKRIPNKKPGKTTT  
KPTKKPTLTKTKDKPKPQTTSKEVLTTKPTKPTINTTKTNI RTLLTSNTTENPEH  
TSQEETLHSTTSEG YLSPSQVYTTSEYLSQSPSSSNTTK"

ORIGIN

1 atcagcttct ccaatctgtc cggaactaca tcacaatcca ccaccatact agcttcaata  
61 acaccaagtg ctgagtcaac cccacaatcc acaacagtca agatcaaaaa cacaacaaca  
121 acccaaatat taccagcaa acccaactaca aaacaacgcc aaaataaacc acaaaacaaa  
181 cccaacaatg attttcactt tgaagtgttc aatthttgtac cctgcagcat atgcagcaac  
241 aatccaacct gctgggceat ctgcaagaga ataccaaca aaaaacctgg aaagaaaacc  
301 accaccaagc ccacaaaaaa accaacctc agacaacca aaaaagatcc caaacctcaa  
361 accacaaaat caaaggaagt actaccacc aagcctacag aaaagccaac catcaacacc  
421 accaaaaaca acatcagaac tacactgtc actccaaca ccacagaaaa tccagaacac  
481 acaagtaag aggaaaccct cactcaacc acctccgaag gctatctaag cccatcacia  
541 gtctatacaa catccgagta cctatcacia tctccatctt catccaacac aacaaaatga

//

LOCUS KY327939 600 bp cRNA linear VRL 13-DEC-2016

DEFINITION Human respiratory syncytial virus A isolate TH-CU381/2012  
attachment glycoprotein gene, partial cds.

ACCESSION KY327939

VERSION KY327939

KEYWORDS .

SOURCE Human respiratory syncytial virus A

ORGANISM Human respiratory syncytial virus A

Viruses; ssRNA viruses; ssRNA negative-strand viruses;  
Mononegavirales; Pneumoviridae; Orthopneumovirus.

REFERENCE 1 (bases 1 to 600)

AUTHORS Thongpan,I., Mauleekoonphairoj,J., Vichiwattana,P., Korkong,S.,  
Vongpunsawad,S. and Poovorawan,Y.

TITLE Molecular Characterization of Respiratory Syncytial Virus in  
Thailand, 2012-2015

JOURNAL Unpublished

REFERENCE 2 (bases 1 to 600)

AUTHORS Thongpan,I., Mauleekoonphairoj,J., Vichiwattana,P., Korkong,S.,  
Vongpunsawad,S. and Poovorawan,Y.

TITLE Direct Submission

JOURNAL Submitted (13-DEC-2016) Department of Pediatrics, Center of  
Excellence in Clinical Virology, Faculty of Medicine, Chulalongkorn  
University, Bangkok 10330, Thailand

COMMENT ##Assembly-Data-START##

Assembly Method :: DNASTAR-Lasergene v. 6  
Sequencing Technology :: Sanger dideoxy sequencing  
##Assembly-Data-END##

FEATURES Location/Qualifiers

source 1..600

/organism="Human respiratory syncytial virus A"  
/mol\_type="viral cRNA"  
/isolate="TH-CU381/2012"  
/host="Homo sapiens"  
/db\_xref="taxon:208893"  
/country="Thailand"  
/collection\_date="01-Jun-2012"  
/note="group: A"

CDS <1..600

/note="G protein"  
/codon\_start=1  
/product="attachment glycoprotein"  
/protein\_id="APY20280"  
/translation="ISFSNLSGTTTQSTTILASITPSAESTPQSTTVKIKNTTTTQIL

PSKPTTKQRQNKPNKPNNDHFHFEVFNFPVPCSICSNNTCWAICKRIPNKKPGKTTT  
KPTKKPTLKTTKKDPKPQTTPKPEVLTTKPTEKPTINTTKTNIRTTLLTSNTTGNPEH  
TSQEETLHSTTSEGYLSPSQVYTTSEYLSQSPSSSNTTK"

ORIGIN

1 atcagcttet ccaatctgtc cggaactaca tcacaatcca ccaccatact agcttcaata  
61 acaccaagtg ctgagtcaac cccacaatcc acaacagtca agatcaaaaa cacaacaaca  
121 acccaaatat tacctagcaa acccaccaca aaacaacgcc aaaataaacc acaaaacaaa  
181 cccaacaatg attttcactt tgaagtgttc aattttgtac cctgcagcat atgcagcaac  
241 aatccaacct gctgggceat ctgcaagaga ataccaaca aaaaacctgg aaagaaaacc  
301 accaccaagc ccacaaaaaa accaacctc aagacaacca aaaaagatcc caaacctcaa  
361 accacaaaac caaaggaagt actcaccacc aagcctacag aaaagccaac catcaacacc  
421 accaaaaaca acatcagaac tacactgtc acctccaaca ccacaggaaa tccagaacac  
481 acaagtcaag aggaaaccct cactcaacc acctccgaag gctatetaag ccatcacia  
541 gtctatacaa catccgagta cctatcacia tctcatctt catccaacac aacaaaatga

//

LOCUS KY327940 600 bp cRNA linear VRL 13-DEC-2016

DEFINITION Human respiratory syncytial virus A isolate TH-CU281/2012  
attachment glycoprotein gene, partial cds.

ACCESSION KY327940

VERSION KY327940

KEYWORDS .

SOURCE Human respiratory syncytial virus A

ORGANISM Human respiratory syncytial virus A

Viruses; ssRNA viruses; ssRNA negative-strand viruses;  
Mononegavirales; Pneumoviridae; Orthopneumovirus.

REFERENCE 1 (bases 1 to 600)

AUTHORS Thongpan,I., Mauleekoonphairoj,J., Vichiwattana,P., Korkong,S.,  
Vongpunsawad,S. and Poovorawan,Y.

TITLE Molecular Characterization of Respiratory Syncytial Virus in  
Thailand, 2012-2015

JOURNAL Unpublished

REFERENCE 2 (bases 1 to 600)

AUTHORS Thongpan,I., Mauleekoonphairoj,J., Vichiwattana,P., Korkong,S.,  
Vongpunsawad,S. and Poovorawan,Y.

TITLE Direct Submission

JOURNAL Submitted (13-DEC-2016) Department of Pediatrics, Center of  
Excellence in Clinical Virology, Faculty of Medicine, Chulalongkorn  
University, Bangkok 10330, Thailand

COMMENT ##Assembly-Data-START##

Assembly Method :: DNASTAR-Lasergene v. 6  
Sequencing Technology :: Sanger dideoxy sequencing  
##Assembly-Data-END##

FEATURES Location/Qualifiers

source 1..600  
/organism="Human respiratory syncytial virus A"  
/mol\_type="viral cRNA"  
/isolate="TH-CU281/2012"  
/host="Homo sapiens"  
/db\_xref="taxon:208893"  
/country="Thailand"  
/collection\_date="01-Feb-2012"  
/note="group: A"

CDS <1..600  
/note="G protein"

```
/codon_start=1
/product="attachment glycoprotein"
/protein_id="APY20281"
/translation="ISFSNLSGTTTSQSTTILASITPSAESTPQSTTVKIKNTTTTQIL
PSKPTTKQRQNKPNKPNNDFFHFVFNFPVCSICSNNPTCWAICKRIPNKKPGKTTT
KPTKKPTLKTTKKDKPKPQTTPKPEVLTTKPTKPTINTTKTNIRTTLLTSNTTGNPEH
TSQEETLHSTTSEGYLSPSQVYTTSEYLSQSPSSSNTTK"
```

ORIGIN

```
1 atcagcttct ccaatctgtc cggaactaca tcacaatcca ccaccatact agcttcaata
61 acaccaagtg ctgagtcaac cccacaatcc acaacagtca agatcaaaaa tacaacaaca
121 acccaaatat tacctagcaa acccaccaca aaacaacgcc aaaataaacc acaaaacaaa
181 cccaacaatg atttctactt tgaagtgttc aatthttgtac cctgcagcat atgcagcaac
241 aatccaacct gctgggcat ctgcaagaga ataccaaca aaaaacctgg aaagaaaacc
301 accaccaagc ctacaaaaaa accaacctc aagacaacca aaaaagatcc caaacctcaa
361 accacaaaaac caaaggaagt actcaccacc aagcctacag aaaagccaac catcaacacc
421 accaaaaacaa acatcagaac cacactgctc acctccaaca ccacaggaaa tccagaacac
481 acaagtcaag aggaaaccct cactcaacc acctccgaag gctatctaag cccatcacia
541 gtctatacaa catccgagta cctatcacia tctccatctt catccaacac aacaaaatga
```

```
//
LOCUS KY327941 600 bp cRNA linear VRL 13-DEC-2016
DEFINITION Human respiratory syncytial virus A isolate TH-CU/C3211/2012
attachment glycoprotein gene, partial cds.
```

ACCESSION KY327941

VERSION KY327941

KEYWORDS .

SOURCE Human respiratory syncytial virus A

ORGANISM Human respiratory syncytial virus A

Viruses; ssRNA viruses; ssRNA negative-strand viruses;  
Mononegavirales; Pneumoviridae; Orthopneumovirus.

REFERENCE 1 (bases 1 to 600)

AUTHORS Thongpan,I., Mauleekoonphairoj,J., Vichiwattana,P., Korkong,S.,  
Vongpunsawad,S. and Poovorawan,Y.

TITLE Molecular Characterization of Respiratory Syncytial Virus in  
Thailand, 2012-2015

JOURNAL Unpublished

REFERENCE 2 (bases 1 to 600)

AUTHORS Thongpan,I., Mauleekoonphairoj,J., Vichiwattana,P., Korkong,S.,  
Vongpunsawad,S. and Poovorawan,Y.

TITLE Direct Submission

JOURNAL Submitted (13-DEC-2016) Department of Pediatrics, Center of  
Excellence in Clinical Virology, Faculty of Medicine, Chulalongkorn  
University, Bangkok 10330, Thailand

COMMENT ##Assembly-Data-START##

Assembly Method :: DNASTAR-Lasergene v. 6  
Sequencing Technology :: Sanger dideoxy sequencing  
##Assembly-Data-END##

FEATURES Location/Qualifiers

source 1..600

```
/organism="Human respiratory syncytial virus A"
/mol_type="viral cRNA"
/isolate="TH-CU/C3211/2012"
/host="Homo sapiens"
/db_xref="taxon:208893"
/country="Thailand"
```

/collection\_date="01-Sep-2012"  
/note="group: A"  
CDS <1..600  
/note="G protein"  
/codon\_start=1  
/product="attachment glycoprotein"  
/protein\_id="APY20282"  
/translation="ISFSNLSGTTSQSTTILASTTPSAESTPQSTIVKIKNTTTTQIL  
PSKPTTKQRQNKPNKPNDFHFEVFNFPVCSICSNNPTCWAICKRIPNKKPGKTTT  
KPTKKPTLKTTKKDPKLQTTKPKEVLTTKPTEKPTIDTTKTNIRTTLLTSNTTGNPEH  
TSQEETLHSTTSEGYLSPSQVYTTSEYLSQSPSSSNTTK"

ORIGIN

1 atcagcttct ccaatctgtc cggaactaca tcacaatcca ccaccatact agcttcaaca  
61 acaccaagtg ctgagtcaac cccacaatcc acaatagtca agatcaaaaa cacaacaaca  
121 acccaaatat tacctagcaa acccaccaca aaacaacgcc aaaataaacc acaaaacaaa  
181 cccaacaatg attttcactt tgaagtgttc aattttgtac cctgcagcat atgcagcaac  
241 aatccaacct gctgggctat ctgcaagaga ataccaaca aaaaacctgg aaagaaaacc  
301 accaccaagc ccacaaaaaa accaacctc aagacaacca aaaaagatcc caaactcaa  
361 accacaaaaac caaaggaagt actcaccacc aagcctacag aaaagccaac catcgacacc  
421 accaaaaacaa acatcagaac tacactgtc acctccaaca ccacaggaaa tccagaacac  
481 acaagtcaag aggaaaccct cactcaacc acctccgaag gctatctaag ccatcacia  
541 gtctatacaa catccgagta cctatcacia tctcatctt catccaacac aacaaaatga

//  
LOCUS KY327942 600 bp cRNA linear VRL 13-DEC-2016

DEFINITION Human respiratory syncytial virus A isolate TH-CU408/2012  
attachment glycoprotein gene, partial cds.

ACCESSION KY327942

VERSION KY327942

KEYWORDS .

SOURCE Human respiratory syncytial virus A

ORGANISM Human respiratory syncytial virus A

Viruses; ssRNA viruses; ssRNA negative-strand viruses;  
Mononegavirales; Pneumoviridae; Orthopneumovirus.

REFERENCE 1 (bases 1 to 600)

AUTHORS Thongpan,I., Mauleekoonphairoj,J., Vichiwattana,P., Korkong,S.,  
Vongpunsawad,S. and Poovorawan,Y.

TITLE Molecular Characterization of Respiratory Syncytial Virus in  
Thailand, 2012-2015

JOURNAL Unpublished

REFERENCE 2 (bases 1 to 600)

AUTHORS Thongpan,I., Mauleekoonphairoj,J., Vichiwattana,P., Korkong,S.,  
Vongpunsawad,S. and Poovorawan,Y.

TITLE Direct Submission

JOURNAL Submitted (13-DEC-2016) Department of Pediatrics, Center of  
Excellence in Clinical Virology, Faculty of Medicine, Chulalongkorn  
University, Bangkok 10330, Thailand

COMMENT ##Assembly-Data-START##

Assembly Method :: DNASTAR-Lasergene v. 6  
Sequencing Technology :: Sanger dideoxy sequencing  
##Assembly-Data-END##

FEATURES Location/Qualifiers

source 1..600

/organism="Human respiratory syncytial virus A"  
/mol\_type="viral cRNA"

/isolate="TH-CU408/2012"  
/host="Homo sapiens"  
/db\_xref="taxon:208893"  
/country="Thailand"  
/collection\_date="01-Aug-2012"  
/note="group: A"

CDS

<1..600  
/note="G protein"  
/codon\_start=1  
/product="attachment glycoprotein"  
/protein\_id="APY20283"  
/translation="ISFSNLSGTTTSQSTTILASTTPSAESIPQSTTVKIKNTTTTQIL  
PSKPTTKQRQNKPKQNKPNDFHFEVFNFPVCSICSNNPTCWAICKRIPNKKPGKKT  
KPTKKPTLKTTKKDKPKPQTTPKPEVLTTKPTKPTIDTTKTNIRTTLLTSNTTGNPEH  
TSQEETLHSTTSEGYLSPSQVYTTSEYLSQYPSSSNTTK"

ORIGIN

1 atcagcttct ccaatctgtc cggaactaca tcacaatcca ccaccatact agcttcaaca  
61 acaccaagtg ctgagtcaat ccacaatcc acaacagtca agatcaaaaa cacaacaaca  
121 acccaaatat taccagcaa acccaccaca aaacaacgcc aaaacaaacc acaaaacaaa  
181 cccaacaatg atttctactt tgaagtgttc aatthttgtac cctgcagcat atgcagcaac  
241 aatccaacct gctgggcat ctgcaagaga ataccaaca aaaaacctgg aaagaaaacc  
301 accaccaagc ccacaaaaaa accaacctc aagacaacca aaaaagatcc caaacctcaa  
361 accacaaaac caaaggaagt actcaccacc aagccacag aaaaaccaac catcgacacc  
421 accaaaacaa acatcagaac tacactgtc acctcaaca ccacaggaaa tccagaacac  
481 acaagtcag aggaaaccct cactcaacc acctccgaag gctatetaag cccatcacia  
541 gtctatacaa catccgagta cctatcacia tatcatctt catccaacac aacaaaatga

//

LOCUS KY327943 600 bp cRNA linear VRL 13-DEC-2016  
DEFINITION Human respiratory syncytial virus A isolate TH-CU/C3180/2012  
attachment glycoprotein gene, partial cds.

ACCESSION KY327943

VERSION KY327943

KEYWORDS .

SOURCE Human respiratory syncytial virus A

ORGANISM Human respiratory syncytial virus A

Viruses; ssRNA viruses; ssRNA negative-strand viruses;  
Mononegavirales; Pneumoviridae; Orthopneumovirus.

REFERENCE 1 (bases 1 to 600)

AUTHORS Thongpan,I., Mauleekoonphairoj,J., Vichiwattana,P., Korkong,S.,  
Vongpunsawad,S. and Poovorawan,Y.

TITLE Molecular Characterization of Respiratory Syncytial Virus in  
Thailand, 2012-2015

JOURNAL Unpublished

REFERENCE 2 (bases 1 to 600)

AUTHORS Thongpan,I., Mauleekoonphairoj,J., Vichiwattana,P., Korkong,S.,  
Vongpunsawad,S. and Poovorawan,Y.

TITLE Direct Submission

JOURNAL Submitted (13-DEC-2016) Department of Pediatrics, Center of  
Excellence in Clinical Virology, Faculty of Medicine, Chulalongkorn  
University, Bangkok 10330, Thailand

COMMENT ##Assembly-Data-START##

Assembly Method :: DNASTAR-Lasergene v. 6  
Sequencing Technology :: Sanger dideoxy sequencing  
##Assembly-Data-END##

FEATURES Location/Qualifiers

source 1..600  
/organism="Human respiratory syncytial virus A"  
/mol\_type="viral cRNA"  
/isolate="TH-CU/C3180/2012"  
/host="Homo sapiens"  
/db\_xref="taxon:208893"  
/country="Thailand"  
/collection\_date="01-Sep-2012"  
/note="group: A"

CDS <1..600  
/note="G protein"  
/codon\_start=1  
/product="attachment glycoprotein"  
/protein\_id="APY20284"  
/translation="ISFSNLSGTTTSQSTTILASTTPSAESTPQSTTVKIKNTTTTQIQ  
PSKPTTKQRQNKPKQNKPNDFHFEVFNFPVCSICSNNPTCWAICKRIPNKKPGKTTT  
KPTKKPTIKTTKKDPKPQTTKPKEVLTTKSTEKPTIYTTKTNIRTTLLTSNTTGNPEH  
TSQEETLHSTTSEGNLSPSQVYTTSEYLSQSPSSSNTSK"

ORIGIN

1 atcagcttct ctaatctgtc cggaactaca tcacaatcca ccaccatact agcttcaaca  
61 acaccaagtg ctgagtcaac cccacaatcc acaacagtca agatcaaaaa cacaacaaca  
121 acccaaatac aacctageaa acccaccaca aaacaacgcc aaaataaacc acaaaacaaa  
181 cccaacaatg attttcactt tgaagtgttc aatthttgtac cctgcagcat atgcagcaac  
241 aatccaacct gctgggceat ctgcaagaga ataccaaca aaaaacctgg aaagaaaacc  
301 accaccaagc ccacaaaaaa accaaccatc aagacaacca aaaaagatcc caaacctcaa  
361 accacaaaaac caaaggaagt actcaccacc aagtcacagc aaaagccaac catctacacc  
421 accaaaaacaa acattagaac tacactgtc acctccaaca ccacaggaaa tccagaacac  
481 acaagtcaag aggaaaccct cactcaacc acctccgaag gcaatctaag cccatcaaca  
541 gtctatacaa catccgagta cctatcaaca tetccatctt catccaacac atcaaatga

//

LOCUS KY327944 600 bp cRNA linear VRL 13-DEC-2016

DEFINITION Human respiratory syncytial virus A isolate TH-CU358/2012  
attachment glycoprotein gene, partial cds.

ACCESSION KY327944

VERSION KY327944

KEYWORDS .

SOURCE Human respiratory syncytial virus A

ORGANISM Human respiratory syncytial virus A

Viruses; ssRNA viruses; ssRNA negative-strand viruses;  
Mononegavirales; Pneumoviridae; Orthopneumovirus.

REFERENCE 1 (bases 1 to 600)

AUTHORS Thongpan,I., Mauleekoonphairoj,J., Vichiwattana,P., Korkong,S.,  
Vongpunsawad,S. and Poovorawan,Y.

TITLE Molecular Characterization of Respiratory Syncytial Virus in  
Thailand, 2012-2015

JOURNAL Unpublished

REFERENCE 2 (bases 1 to 600)

AUTHORS Thongpan,I., Mauleekoonphairoj,J., Vichiwattana,P., Korkong,S.,  
Vongpunsawad,S. and Poovorawan,Y.

TITLE Direct Submission

JOURNAL Submitted (13-DEC-2016) Department of Pediatrics, Center of  
Excellence in Clinical Virology, Faculty of Medicine, Chulalongkorn  
University, Bangkok 10330, Thailand



COMMENT ##Assembly-Data-START##

Assembly Method :: DNASTAR-Lasergene v. 6  
Sequencing Technology :: Sanger dideoxy sequencing  
##Assembly-Data-END##

FEATURES Location/Qualifiers

source 1..600

/organism="Human respiratory syncytial virus A"  
/mol\_type="viral cRNA"  
/isolate="TH-CU358/2012"  
/host="Homo sapiens"  
/db\_xref="taxon:208893"  
/country="Thailand"  
/collection\_date="01-May-2012"  
/note="group: A"

CDS <1..600

/note="G protein"  
/codon\_start=1  
/product="attachment glycoprotein"  
/protein\_id="APY20285"  
/translation="ISFSNLSGTTTQSTTILASTTPSAESTPQSTTVKIKNTTTTQIQ  
PSKPTTKQRQNKPNKPNNDFFHFVFNFPVCSICSNNPTCWAICNRIPNKKPGKTTT  
KPTKKPTIKITKDKPKPQTTPKPEVLTTKPTKPTIYTTKTNIRTTLLTSNTTGNPEH  
TSQEETLHSTTSEGNLSPSQVYTTSEYLSQSPSSSNTSK"

ORIGIN

1 atcagcttct ccaatctgtc cggaactaca tcacaatcca ccaccatact agcttcaaca  
61 acaccaagtg ctgagtcaac cccacaatcc acaacagtca agatcaaaaa cacaactaca  
121 acccaaatac aacctageaa acccaccaca aaacaacgcc aaaataaacc acaaaacaaa  
181 cccaacaatg attttcactt tgaagtgttc aattttgtac cctgcagcat atgcagcaac  
241 aatccaacct gctgggceat ctgcaataga ataccaaaaca aaaaacctgg aaagaaaacc  
301 accaccaagc ccacaaaaaa accaaccatc aagataacca aaaaagatcc caaacctcaa  
361 accacaaaaac caaaggaagt actcaccacc aagcccacag aaaagccaac catctacacc  
421 accaaaaacaa acatcagaac tacactgtc acctccaaca ccacaggaaa tccagaacac  
481 acaagtcaag aggaaaccct cactcaacc acctccgaag gcaatctaag cccatcacia  
541 gtctatacaa catccgagta cctatcacia tctccatctt catccaacac atcaaatga

//

LOCUS KY327945 600 bp cRNA linear VRL 13-DEC-2016

DEFINITION Human respiratory syncytial virus A isolate TH-CU/CB128/2013  
attachment glycoprotein gene, partial cds.

ACCESSION KY327945

VERSION KY327945

KEYWORDS .

SOURCE Human respiratory syncytial virus A

ORGANISM Human respiratory syncytial virus A

Viruses; ssRNA viruses; ssRNA negative-strand viruses;  
Mononegavirales; Pneumoviridae; Orthopneumovirus.

REFERENCE 1 (bases 1 to 600)

AUTHORS Thongpan,I., Mauleekoonphairoj,J., Vichiwattana,P., Korkong,S.,  
Vongpunsawad,S. and Poovorawan,Y.

TITLE Molecular Characterization of Respiratory Syncytial Virus in  
Thailand, 2012-2015

JOURNAL Unpublished

REFERENCE 2 (bases 1 to 600)

AUTHORS Thongpan,I., Mauleekoonphairoj,J., Vichiwattana,P., Korkong,S.,  
Vongpunsawad,S. and Poovorawan,Y.

TITLE Direct Submission  
JOURNAL Submitted (13-DEC-2016) Department of Pediatrics, Center of Excellence in Clinical Virology, Faculty of Medicine, Chulalongkorn University, Bangkok 10330, Thailand  
COMMENT ##Assembly-Data-START##  
Assembly Method :: DNASTAR-Lasergene v. 6  
Sequencing Technology :: Sanger dideoxy sequencing  
##Assembly-Data-END##  
FEATURES Location/Qualifiers  
source 1..600  
/organism="Human respiratory syncytial virus A"  
/mol\_type="viral cRNA"  
/isolate="TH-CU/CB128/2013"  
/host="Homo sapiens"  
/db\_xref="taxon:208893"  
/country="Thailand"  
/collection\_date="01-Nov-2012"  
/note="group: A"  
CDS <1..600  
/note="G protein"  
/codon\_start=1  
/product="attachment glycoprotein"  
/protein\_id="APY20286"  
/translation="ISFSNLSETTSQSTTILASTTPSAEPTPQSTTVKIKNTTTTQIQ  
PSKPTTKQRQNKPNKPNNDFFHEVFNFPVCSICSNNPTCWAICKRIPNKKPGKTTT  
KPTKKPTIKTTKKDPKPQTTKPKEVLTTKPTEKPTIYTTKTNIRTTLLTSNTTGNPEH  
TSQEETLHSTTSEGNLSPSQVYTTSEYLSQSPSSSNTSK"  
ORIGIN  
1 atcagcttct ccaatctgtc cgaaactaca tcacaatcca ccaccatact agcttcaaca  
61 acaccaagtg ctgagccaac cccacaatcc acaacagtca agatcaaaaa cacaacaaca  
121 acccaaatac aacctageaa acccaccaca aaacaacgcc aaaacaaacc acaaaacaaa  
181 cccaacaatg attttcactt tgaagtgttc aattttgtac cctgtagcat atgcagcaac  
241 aatccaacct gctgggceat ctgcaagaga ataccaaca aaaaacctgg aaagaaaacc  
301 accaccaagc ccacaaaaaa accaaccatc aagacaacca aaaaagatcc caaacctcaa  
361 accacaaaac caaaggaagt actcaccacc aagcccacag aaaagccaac catctacacc  
421 accaaaacaa acatcagaac tacactgtc acctccaaca ccacaggaaa tccagaacac  
481 acaagtcaag aggaaaccct cactcaacc acctccgaag gcaatctaag cccatcacia  
541 gtctatacaa catccgagta cctatcacia tctcatctt catccaacac atcaaatga  
//  
LOCUS KY327946 600 bp cRNA linear VRL 13-DEC-2016  
DEFINITION Human respiratory syncytial virus A isolate TH-CU/C3292/2012  
attachment glycoprotein gene, partial cds.  
ACCESSION KY327946  
VERSION KY327946  
KEYWORDS .  
SOURCE Human respiratory syncytial virus A  
ORGANISM Human respiratory syncytial virus A  
Viruses; ssRNA viruses; ssRNA negative-strand viruses;  
Mononegavirales; Pneumoviridae; Orthopneumovirus.  
REFERENCE 1 (bases 1 to 600)  
AUTHORS Thongpan,I., Mauleekoonphairoj,J., Vichiwattana,P., Korkong,S.,  
Vongpunswad,S. and Poovorawan,Y.  
TITLE Molecular Characterization of Respiratory Syncytial Virus in  
Thailand, 2012-2015

JOURNAL Unpublished  
REFERENCE 2 (bases 1 to 600)  
AUTHORS Thongpan,I., Mauleekoonphairoj,J., Vichiwattana,P., Korkong,S.,  
Vongpunsawad,S. and Poovorawan,Y.  
TITLE Direct Submission  
JOURNAL Submitted (13-DEC-2016) Department of Pediatrics, Center of  
Excellence in Clinical Virology, Faculty of Medicine, Chulalongkorn  
University, Bangkok 10330, Thailand  
COMMENT ##Assembly-Data-START##  
Assembly Method :: DNASTAR-Lasergene v. 6  
Sequencing Technology :: Sanger dideoxy sequencing  
##Assembly-Data-END##  
FEATURES Location/Qualifiers  
source 1..600  
/organism="Human respiratory syncytial virus A"  
/mol\_type="viral cRNA"  
/isolate="TH-CU/C3292/2012"  
/host="Homo sapiens"  
/db\_xref="taxon:208893"  
/country="Thailand"  
/collection\_date="01-Oct-2012"  
/note="group: A"  
CDS <1..600  
/note="G protein"  
/codon\_start=1  
/product="attachment glycoprotein"  
/protein\_id="APY20287"  
/translation="ISFSNLSGTTTSQSTTILASTTPSAESTPQSTTVKIKTTTTTQIQ  
PSKPTTKQRQNKPNKPNNDFFHEVFNFPVPCISCSNNPTCWAICKRIPNKKPGKKT  
KPTKKSTIKTTKKDPKPQTTKPKVLLTKPTEKPTIDTTKTNIRTTLLTFNTTGNPEH  
TSQEETLHSTTSEGNLSPSQVYTTSEYLSQSPSSSNTIK"  
ORIGIN  
1 atcagcttct ccaatctgtc cggaactaca tcacaatcca ccaccatact agcttcaaca  
61 acaccaagtg ctgagtcaac cccacaatcc acaacagtca agatcaaaac cacaacaaca  
121 acccaaatac aacctageaa acccaccaca aaacaacgcc aaaataaacc acaaaacaaa  
181 cccaacaatg attttcactt tgaagtgttc aatthttgtac cctgcagcat atgcagcaac  
241 aatccaacct gctgggceat ctgcaagaga ataccaaca aaaaacctgg aaagaaaacc  
301 accactaagc ccacaaaaaa atcaaccatc aagacaacca aaaaagatcc caaacctcaa  
361 accacaaaac caaaggaagt actcaccacc aagcccacag aaaagccaac catcgacacc  
421 accaaaacaa acatcagaac tacactgtct acctcaaca ccacaggaaa tccagaacac  
481 acaagtcaag aggaaaccct cactcaacc acctccgaag gcaatctaag cccatcacia  
541 gtctatacaa catccgagta cctatcacia tctccatctt catccaacac aataaaatga  
//  
LOCUS KY327947 600 bp cRNA linear VRL 13-DEC-2016  
DEFINITION Human respiratory syncytial virus A isolate TH-CU/C3133/2012  
attachment glycoprotein gene, partial cds.  
ACCESSION KY327947  
VERSION KY327947  
KEYWORDS .  
SOURCE Human respiratory syncytial virus A  
ORGANISM Human respiratory syncytial virus A  
Viruses; ssRNA viruses; ssRNA negative-strand viruses;  
Mononegavirales; Pneumoviridae; Orthopneumovirus.  
REFERENCE 1 (bases 1 to 600)

AUTHORS Thongpan,I., Mauleekoonphairoj,J., Vichiwattana,P., Korkong,S.,  
Vongpunsawad,S. and Poovorawan,Y.

TITLE Molecular Characterization of Respiratory Syncytial Virus in  
Thailand, 2012-2015

JOURNAL Unpublished

REFERENCE 2 (bases 1 to 600)

AUTHORS Thongpan,I., Mauleekoonphairoj,J., Vichiwattana,P., Korkong,S.,  
Vongpunsawad,S. and Poovorawan,Y.

TITLE Direct Submission

JOURNAL Submitted (13-DEC-2016) Department of Pediatrics, Center of  
Excellence in Clinical Virology, Faculty of Medicine, Chulalongkorn  
University, Bangkok 10330, Thailand

COMMENT ##Assembly-Data-START##

Assembly Method :: DNASTAR-Lasergene v. 6  
Sequencing Technology :: Sanger dideoxy sequencing  
##Assembly-Data-END##

FEATURES Location/Qualifiers

source 1..600  
/organism="Human respiratory syncytial virus A"  
/mol\_type="viral cRNA"  
/isolate="TH-CU/C3133/2012"  
/host="Homo sapiens"  
/db\_xref="taxon:208893"  
/country="Thailand"  
/collection\_date="01-Aug-2012"  
/note="group: A"

CDS <1..600  
/note="G protein"  
/codon\_start=1  
/product="attachment glycoprotein"  
/protein\_id="APY20288"  
/translation="ISFSNLSGTTTSQSTTILASTTPSAESTPQSTTVKIKTTTTTQIQ  
PSKPTTKQRQNKPNKPNNDFFHEVFNFVPCISCSNNTPCWAICKRIPNKKPGKTTT  
KPTKKSTIKTTKKDPKPQTTKPKVELTTKPKTEKPTINTTKTNIRTTLLTFNTTGNPEH  
TSQEETLHSTTSEGNSPSQVYTTSEYLSQSPSSSNTIK"

ORIGIN

1 atcagcttct ccaatctgtc cggaactaca tcacaatcca ccaccatact agcttcaaca  
61 acaccaagtg ctgagtcaac cccacaatcc acaacagtca agatcaaaac cacaacaaca  
121 acccaaatac aacctageaa acccaccaca aaacaacgcc aaaataaacc acaaaacaaa  
181 cccaacaatg attttcactt tgaagtgttc aattttgtac cctgcagcat atgcagcaac  
241 aatccaacct gctgggceat ctgcaagaga ataccaaca aaaaacctgg aaagaaaacc  
301 accactaagc ccacaaaaaa atcaaccatc aagacaacca aaaaagatcc caaacctcaa  
361 accacaaaaac caaaggaagt actcaccacc aagcccacag aaaagccaac catcaacacc  
421 accaaaaacaa acatcagaac tacactgetc acctcaaca ccacaggaaa tccagaacac  
481 acaagtcaag aggaaaccct cactcaacc acctccgaag gcaatctaag cccatcaaca  
541 gtctatacaa catccgagta cctatcaaca tetccatctt catccaacac aataaatga

//

LOCUS KY327948 600 bp cRNA linear VRL 13-DEC-2016

DEFINITION Human respiratory syncytial virus A isolate TH-CU/C3134/2012  
attachment glycoprotein gene, partial cds.

ACCESSION KY327948

VERSION KY327948

KEYWORDS .

SOURCE Human respiratory syncytial virus A

ORGANISM Human respiratory syncytial virus A  
Viruses; ssRNA viruses; ssRNA negative-strand viruses;  
Mononegavirales; Pneumoviridae; Orthopneumovirus.

REFERENCE 1 (bases 1 to 600)

AUTHORS Thongpan,I., Mauleekoonphairoj,J., Vichiwattana,P., Korkong,S.,  
Vongpunsawad,S. and Poovorawan,Y.

TITLE Molecular Characterization of Respiratory Syncytial Virus in  
Thailand, 2012-2015

JOURNAL Unpublished

REFERENCE 2 (bases 1 to 600)

AUTHORS Thongpan,I., Mauleekoonphairoj,J., Vichiwattana,P., Korkong,S.,  
Vongpunsawad,S. and Poovorawan,Y.

TITLE Direct Submission

JOURNAL Submitted (13-DEC-2016) Department of Pediatrics, Center of  
Excellence in Clinical Virology, Faculty of Medicine, Chulalongkorn  
University, Bangkok 10330, Thailand

COMMENT ##Assembly-Data-START##

Assembly Method :: DNASTAR-Lasergene v. 6  
Sequencing Technology :: Sanger dideoxy sequencing  
##Assembly-Data-END##

FEATURES Location/Qualifiers

source 1..600

/organism="Human respiratory syncytial virus A"  
/mol\_type="viral cRNA"  
/isolate="TH-CU/C3134/2012"  
/host="Homo sapiens"  
/db\_xref="taxon:208893"  
/country="Thailand"  
/collection\_date="01-Aug-2012"  
/note="group: A"

CDS <1..600

/note="G protein"  
/codon\_start=1  
/product="attachment glycoprotein"  
/protein\_id="APY20289"  
/translation="ISFSNLSGTTTSQSTTILASTTPSAESTPQSTTVKIKNTTTTQIQ  
PSKPTTKQRQNKPNKPNNDFFHFVFNFPVPCISCSNNPTCWAICKRIPNKKPGKKT  
KPTKKPTIKTTKKDPKPQTTPKPEVLTTKPTKPTIDTTKTNIRTTLLTSYTTGNQEH  
TSQEETLHSTTSEGNLSPSQVYTTSEYLSQSPSSSYTTK"

ORIGIN

1 atcagcttct ccaatctgtc cggaactaca tcacaatcca ccaccatact agcttcaaca  
61 acaccaagtg ctgagtcaac cccacaatcc acaacagtca agatcaaaaa cacaacaaca  
121 acccaaatac aacctageaa acccaccaca aaacaacgcc aaaataaacc acaaaacaaa  
181 cccaacaatg attttcactt tgaagtgttc aactttgtac cctgcagcat atgcagcaac  
241 aatccaacct gctgggctat ctgcaagaga ataccaaaca aaaaacctgg aaagaaaact  
301 accaccaagc ccacaaagaa accaaccatc aagacaacca aaaaagatcc caaacctcaa  
361 accacaaaac caaaggaagt actcaccacc aagcccacag aaaagccaac catcgacacc  
421 accaaaacaa acatcagaac taaactgtc acctctaca ctacaggaaa tcaagaacac  
481 acaagtcaag aggaaaccct cactcaacc acctccgaag gcaatctaag cccatcacia  
541 gtctatacaa catccgagta cctatcacia tctcatctt catcctacac aacaaaatga

//

LOCUS KY327949 600 bp cRNA linear VRL 13-DEC-2016

DEFINITION Human respiratory syncytial virus A isolate TH-CU/C3110/2012  
attachment glycoprotein gene, partial cds.

ACCESSION KY327949

VERSION KY327949

KEYWORDS .

SOURCE Human respiratory syncytial virus A

ORGANISM Human respiratory syncytial virus A

Viruses; ssRNA viruses; ssRNA negative-strand viruses;  
Mononegavirales; Pneumoviridae; Orthopneumovirus.

REFERENCE 1 (bases 1 to 600)

AUTHORS Thongpan,I., Mauleekoonphairoj,J., Vichiwattana,P., Korkong,S.,  
Vongpunsawad,S. and Poovorawan,Y.

TITLE Molecular Characterization of Respiratory Syncytial Virus in  
Thailand, 2012-2015

JOURNAL Unpublished

REFERENCE 2 (bases 1 to 600)

AUTHORS Thongpan,I., Mauleekoonphairoj,J., Vichiwattana,P., Korkong,S.,  
Vongpunsawad,S. and Poovorawan,Y.

TITLE Direct Submission

JOURNAL Submitted (13-DEC-2016) Department of Pediatrics, Center of  
Excellence in Clinical Virology, Faculty of Medicine, Chulalongkorn  
University, Bangkok 10330, Thailand

COMMENT ##Assembly-Data-START##

Assembly Method :: DNASTAR-Lasergene v. 6  
Sequencing Technology :: Sanger dideoxy sequencing  
##Assembly-Data-END##

FEATURES Location/Qualifiers

source 1..600

/organism="Human respiratory syncytial virus A"  
/mol\_type="viral cRNA"  
/isolate="TH-CU/C3110/2012"  
/host="Homo sapiens"  
/db\_xref="taxon:208893"  
/country="Thailand"  
/collection\_date="01-Aug-2012"  
/note="group: A"

CDS <1..600

/note="G protein"  
/codon\_start=1  
/product="attachment glycoprotein"  
/protein\_id="APY20290"  
/translation="ISFSNLSGTTTSQSTTILASTTPSAESTPQSTTVKIKNTTTTQIQ  
PSKPTTKQRQNKPKQNKPNDFHFEVFNFPVPCISCSNPTCWAICKRIPNKKPGKTTT  
KPTKKPTIKTTKKDPKPQTTKPKVLTTPKTEKPTIDTTKTNIRTTLLTSYTTGNQEH  
TSQEETLHSTTSEGNLSPSQVYTTSEYLSQSPSSSYTTK"

ORIGIN

1 atcagcttct ccaatctgtc cggaactaca tcacaatcca ccaccatact agcttcaaca  
61 acaccaagtg ctgagtcaac cccacaatcc acaacagtca agatcaaaaa cacaacaaca  
121 acccaaatac aacctageaa acccaccaca aaacaacgcc aaaataaacc acaaaacaaa  
181 cccaacaatg atttctactt tgaagtgttc aactttgtac cctgcagcat atgcagcaac  
241 aatccaacct gctgggctat ctgcaagaga ataccacaaca aaaaacctgg aaagaaaact  
301 accaccaagc ccacaaagaa accaaccatc aagacaacca aaaaagatcc caaacctcaa  
361 accacaaaac caaaggaagt actcaccacc aagccacag aaaagccaac catcgacacc  
421 accaaaacaa acatcagaac tacactgetc acctctaca ctacaggaaa tcaagaacac  
481 acaagtcaag aggaaaccct cactcaacc acctccgaag gcaatctaag cccatcaaca  
541 gtctatacaa catccgagta cctatcaaca tctcatctt catcctacac aacaaaatga

```

//
LOCUS   KY327950           600 bp  cRNA  linear  VRL 13-DEC-2016
DEFINITION Human respiratory syncytial virus A isolate TH-CU/C3143/2012
           attachment glycoprotein gene, partial cds.
ACCESSION KY327950
VERSION   KY327950
KEYWORDS   .
SOURCE    Human respiratory syncytial virus A
ORGANISM  Human respiratory syncytial virus A
           Viruses; ssRNA viruses; ssRNA negative-strand viruses;
           Mononegavirales; Pneumoviridae; Orthopneumovirus.
REFERENCE 1 (bases 1 to 600)
AUTHORS   Thongpan,I., Mauleekoonphairoj,J., Vichiwattana,P., Korkong,S.,
           Vongpunsawad,S. and Poovorawan,Y.
TITLE     Molecular Characterization of Respiratory Syncytial Virus in
           Thailand, 2012-2015
JOURNAL   Unpublished
REFERENCE 2 (bases 1 to 600)
AUTHORS   Thongpan,I., Mauleekoonphairoj,J., Vichiwattana,P., Korkong,S.,
           Vongpunsawad,S. and Poovorawan,Y.
TITLE     Direct Submission
JOURNAL   Submitted (13-DEC-2016) Department of Pediatrics, Center of
           Excellence in Clinical Virology, Faculty of Medicine, Chulalongkorn
           University, Bangkok 10330, Thailand
COMMENT   ##Assembly-Data-START##
           Assembly Method      :: DNASTAR-Lasergene v. 6
           Sequencing Technology :: Sanger dideoxy sequencing
           ##Assembly-Data-END##
FEATURES             Location/Qualifiers
     source             1..600
                        /organism="Human respiratory syncytial virus A"
                        /mol_type="viral cRNA"
                        /isolate="TH-CU/C3143/2012"
                        /host="Homo sapiens"
                        /db_xref="taxon:208893"
                        /country="Thailand"
                        /collection_date="01-Aug-2012"
                        /note="group: A"
     CDS                 <1..600
                        /note="G protein"
                        /codon_start=1
                        /product="attachment glycoprotein"
                        /protein_id="APY20291"
                        /translation="ISLSNLSGTTTSQSTTILASTTPSAESTPQSTTVKIKNTTTTQIQ
                        PSKPTTKQRQNKPNKPNNDFFHFVFNFPVPCISCSNNPTCWAICKRIPNKKPGKKT
                        TTKPTTKPTIKTTKKDPKPQTTKPKVLLTKPTEKPTIDTTKTNIRTTLLTSYTTGNQEH
                        TSQEETLHSTTSEGNLSPSQVYTTSEYLSQSPSSSYTTK"
ORIGIN
1 atcagcctct ccaatctgtc cggaactaca tcacaatcca ccaccatact agcttcaaca
61 acaccaagtg ctgagtcaac cccacaatcc acaacagtca agatcaaaaa cacaacaaca
121 acccaaatac aacctageaa acccaccaca aaacaacgcc aaaataaacc acaaaacaaa
181 cccaacaatg atttctactt tgaagtgttc aactttgtac cctgcagcat atgcagcaac
241 aatccaacct gctgggctat ctgcaagaga ataccaaaaca aaaaacctgg aaagaaaact
301 accaccaagc ccacaaagaa accaaccatc aagacaacca aaaaagatcc caaacctcaa

```

361 accacaaaac caaaggaagt actcaccacc aagccacag aaaagccaac catcgacacc  
421 accaaaacaa acatcagaac tacactgctc acctctaca ctacaggaaa tcaagaacac  
481 acaagtaag aggaaccct cactcaacc acctccgaag gcaatctaag cccatcacia  
541 gtctatacaa catccgagta cctatcacia ttccatctt catctacac aacaaaatga

//

LOCUS KY327951 600 bp cRNA linear VRL 13-DEC-2016

DEFINITION Human respiratory syncytial virus A isolate TH-CU/C3205/2012  
attachment glycoprotein gene, partial cds.

ACCESSION KY327951

VERSION KY327951

KEYWORDS .

SOURCE Human respiratory syncytial virus A

ORGANISM Human respiratory syncytial virus A

Viruses; ssRNA viruses; ssRNA negative-strand viruses;

Mononegavirales; Pneumoviridae; Orthopneumovirus.

REFERENCE 1 (bases 1 to 600)

AUTHORS Thongpan,I., Mauleekoonphairoj,J., Vichiwattana,P., Korkong,S.,  
Vongpunsawad,S. and Poovorawan,Y.

TITLE Molecular Characterization of Respiratory Syncytial Virus in  
Thailand, 2012-2015

JOURNAL Unpublished

REFERENCE 2 (bases 1 to 600)

AUTHORS Thongpan,I., Mauleekoonphairoj,J., Vichiwattana,P., Korkong,S.,  
Vongpunsawad,S. and Poovorawan,Y.

TITLE Direct Submission

JOURNAL Submitted (13-DEC-2016) Department of Pediatrics, Center of  
Excellence in Clinical Virology, Faculty of Medicine, Chulalongkorn  
University, Bangkok 10330, Thailand

COMMENT ##Assembly-Data-START##

Assembly Method :: DNASTAR-Lasergene v. 6

Sequencing Technology :: Sanger dideoxy sequencing

##Assembly-Data-END##

FEATURES Location/Qualifiers

source 1..600

/organism="Human respiratory syncytial virus A"

/mol\_type="viral cRNA"

/isolate="TH-CU/C3205/2012"

/host="Homo sapiens"

/db\_xref="taxon:208893"

/country="Thailand"

/collection\_date="01-Sep-2012"

/note="group: A"

CDS <1..600

/note="G protein"

/codon\_start=1

/product="attachment glycoprotein"

/protein\_id="APY20292"

/translation="ISFSNLSGTTTSQSTTILASTTPSAESTPQSTTVKIKNTTTTQIQ

PSKPTTKQHQNKPQNKPNNDFFHFVFNFPVPCICSNNPTCWAICKRIPNKKPGKKT

KPTKKPTIKTTKKDPKPQTTKPKEVLTTKPTKPTIDTTKTNIRTTLLTSYTTGNQEH

TSQEETLHSTTSEGNLSPSQVYTTSEYLSQSPSSSYTTK"

ORIGIN

1 atcagcttct ctaatctgtc cggaactaca tcacaatcca ccaccatact agcttcaaca

61 acaccaagtg ctgagtcaac cccacaatcc acaacagtca agatcaaaaa cacaacaaca



121 acccaatac aacctagcaa acccaccaca aaacaacacc aaaataaacc acaaaacaaa  
181 cccaacaatg attttactt tgaagtgtc aactttgtac cctgcagcat atgcagcaac  
241 aatccaacct gctgggctat ctgcaagaga ataccacaaaca aaaaacctgg aaagaaaact  
301 accaccaagc ccacaaagaa accaaccatc aagacaacca aaaaagatcc caaacctcaa  
361 accacaaaac caaaggaagt actcaccacc aagcccacag aaaagccaac catcgacacc  
421 accaaaacaa acatcagaac tacactgtc acctctaca ctacaggaaa tcaagaacac  
481 acaagtaag aggaaaccct cactcaacc acctccgaag gcaatctaag cccatcacia  
541 gtctatacaa catccgagta cctatcacia tctccatctt catcctacac aacaaaatga

//

LOCUS KY327952 600 bp cRNA linear VRL 13-DEC-2016  
DEFINITION Human respiratory syncytial virus A isolate TH-CU/C3086/2012  
attachment glycoprotein gene, partial cds.

ACCESSION KY327952

VERSION KY327952

KEYWORDS .

SOURCE Human respiratory syncytial virus A

ORGANISM Human respiratory syncytial virus A

Viruses; ssRNA viruses; ssRNA negative-strand viruses;  
Mononegavirales; Pneumoviridae; Orthopneumovirus.

REFERENCE 1 (bases 1 to 600)

AUTHORS Thongpan,I., Mauleekoonphairoj,J., Vichiwattana,P., Korkong,S.,  
Vongpunsawad,S. and Poovorawan,Y.

TITLE Molecular Characterization of Respiratory Syncytial Virus in  
Thailand, 2012-2015

JOURNAL Unpublished

REFERENCE 2 (bases 1 to 600)

AUTHORS Thongpan,I., Mauleekoonphairoj,J., Vichiwattana,P., Korkong,S.,  
Vongpunsawad,S. and Poovorawan,Y.

TITLE Direct Submission

JOURNAL Submitted (13-DEC-2016) Department of Pediatrics, Center of  
Excellence in Clinical Virology, Faculty of Medicine, Chulalongkorn  
University, Bangkok 10330, Thailand

COMMENT ##Assembly-Data-START##

Assembly Method :: DNASTAR-Lasergene v. 6  
Sequencing Technology :: Sanger dideoxy sequencing  
##Assembly-Data-END##

FEATURES Location/Qualifiers

source 1..600

/organism="Human respiratory syncytial virus A"  
/mol\_type="viral cRNA"  
/isolate="TH-CU/C3086/2012"  
/host="Homo sapiens"  
/db\_xref="taxon:208893"  
/country="Thailand"  
/collection\_date="01-Aug-2012"  
/note="group: A"

CDS <1..600

/note="G protein"  
/codon\_start=1  
/product="attachment glycoprotein"  
/protein\_id="APY20293"  
/translation="ISFSNLSGTTTSQSTTILASTTPSAESTPQSTTVKIKNTTTTQIQ  
PSKPTTKQRQNKPNKPNNDFFHFVFNFPVPCISCSNNPTCWAICKRIPNKKPGKTTT  
KPTKKPTIKTTKKDPKPKQTTKPKVLLTKPTEKPTIDTTKTNIRTTLLTSYTTGNQEH

TSQEETLHSTTSEGNLSPSQVYTTSEYLSQSPSSSYTTK"

ORIGIN

1 atcagcttct ccaatctgtc cggaactaca tcacaatcca ccaccatact agcttcaaca  
61 acaccaagtg ctgagtcaac cccacaatcc acaacagtca agatcaaaaa cacaacaaca  
121 acccaaatac aacctagcaa acccaccaca aaacaacgcc aaaataaacc acaaaacaaa  
181 cccaacaatg attttcactt tgaagtgttc aactttgtac cctgcagcat atgcagcaac  
241 aatccaacct gctgggctat ctgcaagaga ataccacaaca aaaaacctgg aaagaaaact  
301 accaccaagc ccacaaagaa accaaccatc aagacaacca aaaaagatcc caaacctcaa  
361 accacaaaac caaggaagt actcaccacc aagcccacag aaaagccaac catcgacacc  
421 accaaaacaa acatcagaac tacactgtc acctctaca ctacaggaaa tcaagaacac  
481 acaagtcaag aggaaacct ccaactcaac acctccgaag gcaatctaag cccatcacia  
541 gtctatacaa catccgagta cctatcacia tctccatctt catcctacac acaaaaatga

//

LOCUS KY327953 600 bp cRNA linear VRL 13-DEC-2016  
DEFINITION Human respiratory syncytial virus A isolate TH-CU/C3066/2012  
attachment glycoprotein gene, partial cds.

ACCESSION KY327953

VERSION KY327953

KEYWORDS .

SOURCE Human respiratory syncytial virus A

ORGANISM Human respiratory syncytial virus A

Viruses; ssRNA viruses; ssRNA negative-strand viruses;  
Mononegavirales; Pneumoviridae; Orthopneumovirus.

REFERENCE 1 (bases 1 to 600)

AUTHORS Thongpan,I., Mauleekoonphairoj,J., Vichiwattana,P., Korkong,S.,  
Vongpunsawad,S. and Poovorawan,Y.

TITLE Molecular Characterization of Respiratory Syncytial Virus in  
Thailand, 2012-2015

JOURNAL Unpublished

REFERENCE 2 (bases 1 to 600)

AUTHORS Thongpan,I., Mauleekoonphairoj,J., Vichiwattana,P., Korkong,S.,  
Vongpunsawad,S. and Poovorawan,Y.

TITLE Direct Submission

JOURNAL Submitted (13-DEC-2016) Department of Pediatrics, Center of  
Excellence in Clinical Virology, Faculty of Medicine, Chulalongkorn  
University, Bangkok 10330, Thailand

COMMENT ##Assembly-Data-START##

Assembly Method :: DNASTAR-Lasergene v. 6  
Sequencing Technology :: Sanger dideoxy sequencing  
##Assembly-Data-END##

FEATURES Location/Qualifiers

source 1..600  
/organism="Human respiratory syncytial virus A"  
/mol\_type="viral cRNA"  
/isolate="TH-CU/C3066/2012"  
/host="Homo sapiens"  
/db\_xref="taxon:208893"  
/country="Thailand"  
/collection\_date="01-Aug-2012"  
/note="group: A"

CDS <1..600  
/note="G protein"  
/codon\_start=1  
/product="attachment glycoprotein"

/protein\_id="APY20294"  
/translation="ISFSNLSGTTSQSTTILASTTPSAESTPQSTTVKIKNTTTTQIQ  
PSKPTTKQRQNKPNNDHFHFEVFNFPVCSICSNNPTCWAICKRIPNKKPGKTTT  
KPTKKPTIKTTKKDPKPQTTKPKVLTTPTEKPTIDTTKTNIRTTLLTSYTTGNQEH  
TSQEETLHSTTSEGNLSPSQVYTTSEYLSQSPSSSYTTK"

ORIGIN

1 atcagttct ccaatctgtc cggaactaca tcacaatcca ccaccatact agcttcaaca  
61 acaccaagtg ctgagtcaac cccacaatcc acaacagtca agatcaaaaa cacaacaaca  
121 acccaataac aacctagcaa acccaccaca aaacaacgcc aaaataaacc acaaaacaaa  
181 cccaacaatg attttactt tgaagtgtc aactttgtac cctgcagcat atgcagcaac  
241 aatccaacct gctgggctat ctgcaagaga ataccacaaca aaaaacctgg aaagaaaact  
301 accaccaage ccacaagaa accaaccatc aagacaacca aaaaagatcc caaacctcaa  
361 accacaaaac caaggaagt actcaccacc aagcccacag aaaagccaac catcgacacc  
421 accaaaacaa acatcagaac tacactgtc acctctaca ctacaggaaa tcaagaacac  
481 acaagtaag aggaaacct cactcaacc acctccgaag gcaatctaag cccatcacia  
541 gtctatacaa catccgagta cctatcacia tctcatctt catctacac aacaaaatga

//

LOCUS KY327954 600 bp cRNA linear VRL 13-DEC-2016  
DEFINITION Human respiratory syncytial virus A isolate TH-CU/C3037/2012  
attachment glycoprotein gene, partial cds.

ACCESSION KY327954

VERSION KY327954

KEYWORDS .

SOURCE Human respiratory syncytial virus A

ORGANISM Human respiratory syncytial virus A

Viruses; ssRNA viruses; ssRNA negative-strand viruses;  
Mononegavirales; Pneumoviridae; Orthopneumovirus.

REFERENCE 1 (bases 1 to 600)

AUTHORS Thongpan,I., Mauleekoonphairoj,J., Vichiwattana,P., Korkong,S.,  
Vongpunsawad,S. and Poovorawan,Y.

TITLE Molecular Characterization of Respiratory Syncytial Virus in  
Thailand, 2012-2015

JOURNAL Unpublished

REFERENCE 2 (bases 1 to 600)

AUTHORS Thongpan,I., Mauleekoonphairoj,J., Vichiwattana,P., Korkong,S.,  
Vongpunsawad,S. and Poovorawan,Y.

TITLE Direct Submission

JOURNAL Submitted (13-DEC-2016) Department of Pediatrics, Center of  
Excellence in Clinical Virology, Faculty of Medicine, Chulalongkorn  
University, Bangkok 10330, Thailand

COMMENT ##Assembly-Data-START##

Assembly Method :: DNASTAR-Lasergene v. 6  
Sequencing Technology :: Sanger dideoxy sequencing  
##Assembly-Data-END##

FEATURES Location/Qualifiers

source 1..600  
/organism="Human respiratory syncytial virus A"  
/mol\_type="viral cRNA"  
/isolate="TH-CU/C3037/2012"  
/host="Homo sapiens"  
/db\_xref="taxon:208893"  
/country="Thailand"  
/collection\_date="01-Jul-2012"  
/note="group: A"

CDS <1..600  
/note="G protein"  
/codon\_start=1  
/product="attachment glycoprotein"  
/protein\_id="APY20295"  
/translation="ISFSNLSGTTTSQSTTILASTTPSAESTPQSTTVKIKNTTTTQIQ  
PSKPTTKQRQNKPNNDFFHFVFNFVPCSICSNNTCWAICKRIPNKKPGKTTT  
KPTKKPTIKTTKKDPKPQTTKPKVLTTPTEKPTIDTTKTNIRTTLLTSYTTGNQEH  
TSQEETLHSTTSEGNLSPSQVYTTSEYLSQSPSSSYTTK"

ORIGIN

1 atcagettct ccaatctgtc cggaactaca tcacaatcca ccaccatact agettcaaca  
61 acaccaagtg ctgagtcaac cccacaatcc acaacagtca agatcaaaaa cacaacaaca  
121 acccaaatac aacctagcaa acccaccaca aaacaacgcc aaaataaacc acaaaacaaa  
181 cccaacaatg attttcactt tgaagtgttc aactttgtac cctgcagcat atgcagcaac  
241 aatccaacct gctgggctat ctgcaagaga ataccacaaca aaaaacctgg aaagaaaact  
301 accaccaagc ccacaagaa accaaccatc aagacaacca aaaaagatcc caaacctcaa  
361 accacaaaac caaggaagt actcaccacc aagcccacag aaaagccaac catcgacacc  
421 accaaaacaa acatcagaac tacactgtc acctctaca ctacaggaaa tcaagaacac  
481 acaagtaag aggaaacct cactcaacc acctccgaag gcaatctaag cccatcacia  
541 gtctatacaa catccgagta cctatcacia ttccatctt catctacac aacaaaatga

//

LOCUS KY327955 600 bp cRNA linear VRL 13-DEC-2016

DEFINITION Human respiratory syncytial virus A isolate TH-CU429/2012  
attachment glycoprotein gene, partial cds.

ACCESSION KY327955

VERSION KY327955

KEYWORDS .

SOURCE Human respiratory syncytial virus A

ORGANISM Human respiratory syncytial virus A

Viruses; ssRNA viruses; ssRNA negative-strand viruses;  
Mononegavirales; Pneumoviridae; Orthopneumovirus.

REFERENCE 1 (bases 1 to 600)

AUTHORS Thongpan,I., Mauleekoonphairoj,J., Vichiwattana,P., Korkong,S.,  
Vongpunsawad,S. and Poovorawan,Y.

TITLE Molecular Characterization of Respiratory Syncytial Virus in  
Thailand, 2012-2015

JOURNAL Unpublished

REFERENCE 2 (bases 1 to 600)

AUTHORS Thongpan,I., Mauleekoonphairoj,J., Vichiwattana,P., Korkong,S.,  
Vongpunsawad,S. and Poovorawan,Y.

TITLE Direct Submission

JOURNAL Submitted (13-DEC-2016) Department of Pediatrics, Center of  
Excellence in Clinical Virology, Faculty of Medicine, Chulalongkorn  
University, Bangkok 10330, Thailand

COMMENT ##Assembly-Data-START##

Assembly Method :: DNASTAR-Lasergene v. 6  
Sequencing Technology :: Sanger dideoxy sequencing  
##Assembly-Data-END##

FEATURES Location/Qualifiers

source 1..600  
/organism="Human respiratory syncytial virus A"  
/mol\_type="viral cRNA"  
/isolate="TH-CU429/2012"  
/host="Homo sapiens"

/db\_xref="taxon:208893"  
/country="Thailand"  
/collection\_date="01-Aug-2012"  
/note="group: A"  
CDS <1..600  
/note="G protein"  
/codon\_start=1  
/product="attachment glycoprotein"  
/protein\_id="APY20296"  
/translation="ISFSNLSGTTSQSTTILASTTPGAESTPQSTTVKFKNTTTTQIL  
PSKPTTKQRQNKPNNDFFHFEVFNFVPCSICSNPTCWAICKRIPNKKPGKKT  
KPTKKPTIKTTKKDPKPQTTKPKVLTTPTEKPTIDTTKTNIRTTLLTSYTTGNPEH  
TSQEETIHSTTSEGNLSPSQVYTTSEYLSQSPSSSYTTK"

ORIGIN

1 atcagttct ccaatctgc cggaactaca tcacaatcca ccaccatact agcttcaaca  
61 acaccaggtg ctgagtcaac cccacaatcc acaacagtea agttcaaaaa cacaacaaca  
121 acccaatac tacctagcaa acccaccaca aaacaacgcc aaaataaacc acaaaacaaa  
181 cccaacaatg atttctact tgaagtgtc aactttgtac cctgcagcat atgcagcaac  
241 aatccaacct gctgggcat ctgcaagaga ataccaca aaaaacctgg aaagaaaacc  
301 accaccaage ccacaaaaa accaaccatc aagacaacca aaaaagatcc caaacctcaa  
361 accacaaaac caaaggaagt actcaccacc aagcccacag aaaagccaac catcgacacc  
421 accaaaacaa acatcagaac tacactgtc acctctaca ccacaggaaa tccagaacac  
481 acaagtaag aggaacat cactcaacc acctcgaag gcaatctaag cccatcaca  
541 gtctatacaa catccgagta cctatcaca tctccatctt catctacac aacaaaatga

//

LOCUS KY327956 600 bp cRNA linear VRL 13-DEC-2016

DEFINITION Human respiratory syncytial virus A isolate TH-CU428/2012  
attachment glycoprotein gene, partial cds.

ACCESSION KY327956

VERSION KY327956

KEYWORDS .

SOURCE Human respiratory syncytial virus A

ORGANISM Human respiratory syncytial virus A

Viruses; ssRNA viruses; ssRNA negative-strand viruses;  
Mononegavirales; Pneumoviridae; Orthopneumovirus.

REFERENCE 1 (bases 1 to 600)

AUTHORS Thongpan,I., Mauleekoonphairoj,J., Vichiwattana,P., Korkong,S.,  
Vongpunsawad,S. and Poovorawan,Y.

TITLE Molecular Characterization of Respiratory Syncytial Virus in  
Thailand, 2012-2015

JOURNAL Unpublished

REFERENCE 2 (bases 1 to 600)

AUTHORS Thongpan,I., Mauleekoonphairoj,J., Vichiwattana,P., Korkong,S.,  
Vongpunsawad,S. and Poovorawan,Y.

TITLE Direct Submission

JOURNAL Submitted (13-DEC-2016) Department of Pediatrics, Center of  
Excellence in Clinical Virology, Faculty of Medicine, Chulalongkorn  
University, Bangkok 10330, Thailand

COMMENT ##Assembly-Data-START##

Assembly Method :: DNASTAR-Lasergene v. 6  
Sequencing Technology :: Sanger dideoxy sequencing  
##Assembly-Data-END##

FEATURES Location/Qualifiers

source 1..600

/organism="Human respiratory syncytial virus A"

/mol\_type="viral cRNA"

/isolate="TH-CU428/2012"

/host="Homo sapiens"

/db\_xref="taxon:208893"

/country="Thailand"

/collection\_date="01-Aug-2012"

/note="group: A"

CDS <1..600

/note="G protein"

/codon\_start=1

/product="attachment glycoprotein"

/protein\_id="APY20297"

/translation="ISFSNLSGTTTSQSTTILASTTPGAESTPQSTTVKFKNTTTTQIL

PSKPTTKQRQNKPKQNKPNDFHFEVFNFVPCSICSNNPWCWAICKRIPNKKPGKKT

KPTKKPTIKTTKKDPKPQTTKPKVLTTPTEKPTIDTTKTNIRTTLLTSYTTGNPEH

TSQEETIHSTTSEGNLSPSQVYTTSEYLSQSPSSSYTTK"

#### ORIGIN

1 atcagcttct ccaatctgtc cggaactaca tcacaatcca ccaccatact agcttcaaca  
61 acaccaggtg ctgagtcaac cccacaatcc acaacagtea agttcaaaaa cacaacaaca  
121 acccaaatac tacctagcaa acccaccaca aaacaacgcc aaaataaacc acaaaacaaa  
181 cccaacaatg attttcactt tgaagtgttc aactttgtac cctgcagcat atgcagcaac  
241 aatccaacct gctgggcat ctgcaagaga atacaaaca aaaaacctgg aaagaaaacc  
301 accaccaagc ccacaaaaaa accaaccatc aagacaacca aaaaagatcc caaacctcaa  
361 accacaaaaa caaaggaagt actcaccacc aagcccacag aaaagccaac catcgacacc  
421 accaaaacaa acatcagaac tacactgtc acctctaca ccacaggaaa tccagaacac  
481 acaagtaag aggaaccat cactcaacc acctccgaag gcaatctaag cccatcacia  
541 gctatacaa catccgagta cctatcacia tctccatctt catctacac aacaaaatga

//

LOCUS KY327957 600 bp cRNA linear VRL 13-DEC-2016

DEFINITION Human respiratory syncytial virus A isolate TH-CU416/2012  
attachment glycoprotein gene, partial cds.

ACCESSION KY327957

VERSION KY327957

KEYWORDS .

SOURCE Human respiratory syncytial virus A

ORGANISM Human respiratory syncytial virus A

Viruses; ssRNA viruses; ssRNA negative-strand viruses;  
Mononegavirales; Pneumoviridae; Orthopneumovirus.

REFERENCE 1 (bases 1 to 600)

AUTHORS Thongpan,I., Mauleekoonphairoj,J., Vichiwattana,P., Korkong,S.,  
Vongpunsawad,S. and Poovorawan,Y.

TITLE Molecular Characterization of Respiratory Syncytial Virus in  
Thailand, 2012-2015

JOURNAL Unpublished

REFERENCE 2 (bases 1 to 600)

AUTHORS Thongpan,I., Mauleekoonphairoj,J., Vichiwattana,P., Korkong,S.,  
Vongpunsawad,S. and Poovorawan,Y.

TITLE Direct Submission

JOURNAL Submitted (13-DEC-2016) Department of Pediatrics, Center of  
Excellence in Clinical Virology, Faculty of Medicine, Chulalongkorn  
University, Bangkok 10330, Thailand

COMMENT ##Assembly-Data-START##

Assembly Method :: DNASTAR-Lasergene v. 6

Sequencing Technology :: Sanger dideoxy sequencing

##Assembly-Data-END##

FEATURES          Location/Qualifiers

source          1..600  
          /organism="Human respiratory syncytial virus A"  
          /mol\_type="viral cRNA"  
          /isolate="TH-CU416/2012"  
          /host="Homo sapiens"  
          /db\_xref="taxon:208893"  
          /country="Thailand"  
          /collection\_date="01-Aug-2012"  
          /note="group: A"

CDS              <1..600  
          /note="G protein"  
          /codon\_start=1  
          /product="attachment glycoprotein"  
          /protein\_id="APY20298"  
          /translation="ISFSNLSGTTSQSTTILASTTPGAESTPQSTTVKFKNTTTTQIL  
          PSKPTTKQRQNKPNKPNNDFFHFEVFNFVPCISCSNNPTCWAICKRIPNKKPGKKT  
          KPTKKPTIKTTKKDPKPQTTKPKVLTTPTEKPTIDTTKTNIRTTLLTSYTTGNPEH  
          TSQEETIHSTTSEGNLSPSQVYTTSEYLSQSPSSSYTTK"

ORIGIN

1 atcagttct ccaatctgc cggaactaca tcacaatcca ccaccatact agettcaaca  
61 acaccagtg ctgagtcaac cccacaatcc acaacagtea agttcaaaaa cacaacaaca  
121 acccaatac tacctagcaa acccaccaca aaacaacgcc aaaataaacc acaaaacaaa  
181 cccaacaatg attttactt tgaagtgtc aactttgtac cctgcagcat atgcagcaac  
241 aatccaacct gctgggcat ctgcaagaga ataccaaaca aaaacctgg aaagaaaacc  
301 accaccaage ccacaaaaaa accaaccatc aagacaacca aaaagatcc caaacctcaa  
361 accacaaaac caaaggaagt actcaccacc aagcccacag aaaagccaac catcgacacc  
421 accaaaacaa acatcagaac tacactgtc acctctaca ccacaggaaa tccagaacac  
481 acaagtaag aggaaccat cactcaacc acctcgaag gcaatctaag cccatcaaa  
541 gtctatacaa catccgagta cctatcaaa ttccatctt catctacac aacaaaatga

//

LOCUS          KY327958          600 bp cRNA linear VRL 13-DEC-2016

DEFINITION Human respiratory syncytial virus A isolate TH-CU441/2012  
attachment glycoprotein gene, partial cds.

ACCESSION KY327958

VERSION KY327958

KEYWORDS .

SOURCE Human respiratory syncytial virus A

ORGANISM Human respiratory syncytial virus A  
Viruses; ssRNA viruses; ssRNA negative-strand viruses;  
Mononegavirales; Pneumoviridae; Orthopneumovirus.

REFERENCE 1 (bases 1 to 600)

AUTHORS Thongpan,I., Mauleekoonphairoj,J., Vichiwattana,P., Korkong,S.,  
Vongpunsawad,S. and Poovorawan,Y.

TITLE Molecular Characterization of Respiratory Syncytial Virus in  
Thailand, 2012-2015

JOURNAL Unpublished

REFERENCE 2 (bases 1 to 600)

AUTHORS Thongpan,I., Mauleekoonphairoj,J., Vichiwattana,P., Korkong,S.,  
Vongpunsawad,S. and Poovorawan,Y.

TITLE Direct Submission

JOURNAL Submitted (13-DEC-2016) Department of Pediatrics, Center of

Excellence in Clinical Virology, Faculty of Medicine, Chulalongkorn University, Bangkok 10330, Thailand

COMMENT ##Assembly-Data-START##

Assembly Method :: DNASTAR-Lasergene v. 6  
Sequencing Technology :: Sanger dideoxy sequencing  
##Assembly-Data-END##

FEATURES Location/Qualifiers

source 1..600

/organism="Human respiratory syncytial virus A"  
/mol\_type="viral cRNA"  
/isolate="TH-CU441/2012"  
/host="Homo sapiens"  
/db\_xref="taxon:208893"  
/country="Thailand"  
/collection\_date="01-Sep-2012"  
/note="group: A"

CDS <1..600

/note="G protein"  
/codon\_start=1  
/product="attachment glycoprotein"  
/protein\_id="APY20299"  
/translation="ISFSNLSGTTTQFTTILASTTPSAESTPQSTTVKIKNTTTTQIQ  
PSKPTTKQRQNKPNNDFFHFEAFNFVPCSTCSNNPTCWAICKRIPNKKPGKKT  
KPTKKPTIKTTKKDPKPQTTKPKVLLTKPTEKPTIDTTKTNIRTTLLTSYTTGNPEH  
TSQEETLHSTTSEGNLSPSQVHTTSEYLSQSPSSSYTTK"

ORIGIN

1 atcagcttct ccaatctgtc cggaactaca tcacaattca ccaccatact agcttcaaca  
61 acaccaagtg ctgagtcaac cccacaatcc acaacagtca agatcaaaaa cacaacaaca  
121 acccaaatac aacctagcaa acccaccaca aaacaacgcc aaaataaacc acaaaacaaa  
181 cccaacaatg atttctactt tgaagcgttc aactttgtac cctgcagcac atgcagcaac  
241 aatccaacct gctgggcat ctgcaagaga ataccaaca aaaaacctgg aaagaaaacc  
301 accaccaagc ccacaaaaaa accaaccatc aagacaacca aaaaagatcc caaacctcaa  
361 accacaaaaa caaggaagt actcaccacc aagcccacag aaaagccaac catcgacacc  
421 accaaaacaa acatcagaac tacactgtc acctctaca ccacaggaaa tccagaacac  
481 acaagtaag aggaaacct cactcaacc acctccgaag gcaatctaag cccatcacia  
541 gtccacacaa catccgagta cctatcacia tetccatctt catcctacac aacaaaatga

//

LOCUS KY327959 600 bp cRNA linear VRL 13-DEC-2016

DEFINITION Human respiratory syncytial virus A isolate TH-CU/C3281/2012  
attachment glycoprotein gene, partial cds.

ACCESSION KY327959

VERSION KY327959

KEYWORDS .

SOURCE Human respiratory syncytial virus A

ORGANISM Human respiratory syncytial virus A

Viruses; ssRNA viruses; ssRNA negative-strand viruses;  
Mononegavirales; Pneumoviridae; Orthopneumovirus.

REFERENCE 1 (bases 1 to 600)

AUTHORS Thongpan,I., Mauleekoonphairoj,J., Vichiwattana,P., Korkong,S.,  
Vongpunsawad,S. and Poovorawan,Y.

TITLE Molecular Characterization of Respiratory Syncytial Virus in  
Thailand, 2012-2015

JOURNAL Unpublished

REFERENCE 2 (bases 1 to 600)



AUTHORS Thongpan,I., Mauleekoonphairoj,J., Vichiwattana,P., Korkong,S.,  
Vongpunsawad,S. and Poovorawan,Y.

TITLE Direct Submission

JOURNAL Submitted (13-DEC-2016) Department of Pediatrics, Center of  
Excellence in Clinical Virology, Faculty of Medicine, Chulalongkorn  
University, Bangkok 10330, Thailand

COMMENT ##Assembly-Data-START##

Assembly Method :: DNASTAR-Lasergene v. 6  
Sequencing Technology :: Sanger dideoxy sequencing  
##Assembly-Data-END##

FEATURES Location/Qualifiers

source 1..600

/organism="Human respiratory syncytial virus A"  
/mol\_type="viral cRNA"  
/isolate="TH-CU/C3281/2012"  
/host="Homo sapiens"  
/db\_xref="taxon:208893"  
/country="Thailand"  
/collection\_date="01-Sep-2012"  
/note="group: A"

CDS <1..600

/note="G protein"  
/codon\_start=1  
/product="attachment glycoprotein"  
/protein\_id="APY20300"  
/translation="ISFSNLSGTTTSQSTTILASTTPSAESTPQSTTVKIKNTTTTQIQ  
PSKPTTKQRQNKPKQNKPNNDFFHFEVFNFVPCISCSNNPTCWAICKRIPNKKPGKKT  
KPTKKPTIKTTKKDPKPQTTKPKVLTTPTEKPTIDTTKTNIRTTLLTSYTTGNPEH  
TSQEETLHSTTSEGNLSPSQVYTTSEYLSQSPSSSYTTK"

ORIGIN

1 atcagcttct ccaatctgtc cggaactaca tcacaatcca ccaccatact agcttcaaca  
61 acaccaagtg ctgagtcaac cccacaatcc acaacagtca agatcaaaaa cacaacaaca  
121 acccaataac aaccaagcaa acccaccaca aaacaacgcc aaaataaacc acaaaacaaa  
181 cccaacaatg atttcactt tgaagtgttc aactttgtac cctgcagcat atgcagcaac  
241 aatccaacct gctgggcat ctgcaagaga ataccaaca aaaacctgg aaagaaaacc  
301 accaccaage ccacaaaaaa accaaccatc aagacaacca aaaagatcc caaacctcaa  
361 accacaaaac caaaggaagt actcaccacc aagcccacag aaaagccaac catcgacacc  
421 accaaaacaa acatcagaac tacactgtc acctctaca ccacaggaaa tccagaacac  
481 acaagtaag aggaaccct cactcaacc acctcgaag gcaatctaag cccatcaaa  
541 gtctatacaa catccgagta cctatcaaaa tctccatctt catcctacac aacaaaatga

//

LOCUS KY327960 600 bp cRNA linear VRL 13-DEC-2016

DEFINITION Human respiratory syncytial virus A isolate TH-CU412/2012  
attachment glycoprotein gene, partial cds.

ACCESSION KY327960

VERSION KY327960

KEYWORDS .

SOURCE Human respiratory syncytial virus A

ORGANISM Human respiratory syncytial virus A  
Viruses; ssRNA viruses; ssRNA negative-strand viruses;  
Mononegavirales; Pneumoviridae; Orthopneumovirus.

REFERENCE 1 (bases 1 to 600)

AUTHORS Thongpan,I., Mauleekoonphairoj,J., Vichiwattana,P., Korkong,S.,  
Vongpunsawad,S. and Poovorawan,Y.

TITLE Molecular Characterization of Respiratory Syncytial Virus in Thailand, 2012-2015

JOURNAL Unpublished

REFERENCE 2 (bases 1 to 600)

AUTHORS Thongpan,I., Mauleekoonphairoj,J., Vichiwattana,P., Korkong,S., Vongpunsawad,S. and Poovorawan,Y.

TITLE Direct Submission

JOURNAL Submitted (13-DEC-2016) Department of Pediatrics, Center of Excellence in Clinical Virology, Faculty of Medicine, Chulalongkorn University, Bangkok 10330, Thailand

COMMENT ##Assembly-Data-START##  
 Assembly Method :: DNASTAR-Lasergene v. 6  
 Sequencing Technology :: Sanger dideoxy sequencing  
 ##Assembly-Data-END##

FEATURES Location/Qualifiers

source 1..600  
 /organism="Human respiratory syncytial virus A"  
 /mol\_type="viral cRNA"  
 /isolate="TH-CU412/2012"  
 /host="Homo sapiens"  
 /db\_xref="taxon:208893"  
 /country="Thailand"  
 /collection\_date="01-Aug-2012"  
 /note="group: A"

CDS <1..600  
 /note="G protein"  
 /codon\_start=1  
 /product="attachment glycoprotein"  
 /protein\_id="APY20301"  
 /translation="ISFSNLSGTTTSQSTTILASTTPSAESTPQSTTVKFKNTTTTQIL  
 PSKPTTKQRQNKPNKPNNDFFHFVFNFVPCISCSNNPTCWAICKRIPNKKPGKKT  
 TTKPTTKPTIKTTKKDPKPKQTTKPKVLTTPKTEKPTIDTTKTNIRTTLLTSYTTGNPEH  
 TSQEETLHSTTSEGNLSPSQVYTTSEYLSQSPSSSYTTK"

ORIGIN

1 atcagcttct ccaatctgtc cggaactaca tcacaatcca ccaccatact agcttcaaca  
 61 acaccaagtg ctgagtcaac cccacaatcc acaacagtca agttcaaaaa cacaacaaca  
 121 acccaataac tacctagcaa acccaccaca aaacaacgcc aaaataaacc acaaaacaaa  
 181 cccaacaatg attttcactt tgaagtgttc aactttgtac cctgcagcat atgcagcaac  
 241 aatccaacct gctgggcat ctgcaagaga ataccaaca aaaaacctgg aaagaaaacc  
 301 accaccaagc ccacaaaaaa accaaccatc aagacaacca aaaaagatcc caaacctcaa  
 361 accacaaaac caaaggaagt actcaccacc aagccacag aaaagccaac catcgacacc  
 421 accaaaacaa acatcagaac tacactgtc acctctaca ccacaggaaa tccagaacac  
 481 acaagtaag aggaaaccct cactcaacc acctccgaag gcaatctaag cccatcaca  
 541 gtctatacaa catccgagta cctatcaca tetccatctt catctacac aacaaaatga

//

LOCUS KY327961 600 bp cRNA linear VRL 13-DEC-2016

DEFINITION Human respiratory syncytial virus A isolate TH-CU492/2012 attachment glycoprotein gene, partial cds.

ACCESSION KY327961

VERSION KY327961

KEYWORDS .

SOURCE Human respiratory syncytial virus A

ORGANISM Human respiratory syncytial virus A  
 Viruses; ssRNA viruses; ssRNA negative-strand viruses;

Mononegavirales; Pneumoviridae; Orthopneumovirus.

REFERENCE 1 (bases 1 to 600)

AUTHORS Thongpan,I., Mauleekoonphairoj,J., Vichiwattana,P., Korkong,S.,  
Vongpunsawad,S. and Poovorawan,Y.

TITLE Molecular Characterization of Respiratory Syncytial Virus in  
Thailand, 2012-2015

JOURNAL Unpublished

REFERENCE 2 (bases 1 to 600)

AUTHORS Thongpan,I., Mauleekoonphairoj,J., Vichiwattana,P., Korkong,S.,  
Vongpunsawad,S. and Poovorawan,Y.

TITLE Direct Submission

JOURNAL Submitted (13-DEC-2016) Department of Pediatrics, Center of  
Excellence in Clinical Virology, Faculty of Medicine, Chulalongkorn  
University, Bangkok 10330, Thailand

COMMENT ##Assembly-Data-START##

Assembly Method :: DNASTAR-Lasergene v. 6  
Sequencing Technology :: Sanger dideoxy sequencing  
##Assembly-Data-END##

FEATURES Location/Qualifiers

source 1..600

/organism="Human respiratory syncytial virus A"  
/mol\_type="viral cRNA"  
/isolate="TH-CU492/2012"  
/host="Homo sapiens"  
/db\_xref="taxon:208893"  
/country="Thailand"  
/collection\_date="01-Nov-2012"  
/note="group: A"

CDS <1..600

/note="G protein"  
/codon\_start=1  
/product="attachment glycoprotein"  
/protein\_id="APY20302"  
/translation="ISFSNLSGTTSQSTTILASTTPSAESTPQSTTVKFKNTTTTQIL  
PSKPTTKQRQNKPNKPNNDFFHFEVFNFVPCISCSNPTCWAICKRIPNKKPGKKT  
KPTKKPTIKTTKKDPKPQTTKPKVLTTPTEKPTIDTTKTNIRTTLLTSYTTGNPEH  
TSQEETLHSTTSEGNLSPSQVYTTSEYLSQSPSSSYTTK"

ORIGIN

1 atcagcttct ccaatctgtc cggaactaca tcacaatcca ccaccatact agcttcaaca  
61 acaccaagtg ctgagtcaac cccacaatcc acaacagtca agttcaaaaa cacaacaaca  
121 acccaataac tacctagcaa acccaccaca aaacaacgcc aaaataaacc acaaaacaaa  
181 cccaacaatg atttctactt tgaagtgttc aactttgtac cctgcagcat atgcagcaac  
241 aatccaacct gctgggcat ctgcaagaga ataccaaca aaaacctgg aaagaaaacc  
301 accaccaage ccacaaaaaa accaaccatc aagacaacca aaaaagatcc caaacctcaa  
361 accacaaaac caaaggaagt actcaccacc aagcccacag aaaagccaac catcgacacc  
421 accaaaacaa acatcagaac tacactgtc acctctaca ccacaggaaa tccagaacac  
481 acaagtaag aggaaacct cactcaacc acctccgaag gcaatetaag cccatcaaa  
541 gtctatacaa catccgagta cctatcaaaa tctccatctt catcctacac aacaaaatga

//

LOCUS KY327962 600 bp cRNA linear VRL 13-DEC-2016

DEFINITION Human respiratory syncytial virus A isolate TH-CU477/2012  
attachment glycoprotein gene, partial cds.

ACCESSION KY327962

VERSION KY327962

KEYWORDS

SOURCE Human respiratory syncytial virus A

ORGANISM Human respiratory syncytial virus A

Viruses; ssRNA viruses; ssRNA negative-strand viruses; Mononegavirales; Pneumoviridae; Orthopneumovirus.

REFERENCE 1 (bases 1 to 600)

AUTHORS Thongpan,I., Mauleekoonphairoj,J., Vichiwattana,P., Korkong,S., Vongpunsawad,S. and Poovorawan,Y.

TITLE Molecular Characterization of Respiratory Syncytial Virus in Thailand, 2012-2015

JOURNAL Unpublished

REFERENCE 2 (bases 1 to 600)

AUTHORS Thongpan,I., Mauleekoonphairoj,J., Vichiwattana,P., Korkong,S., Vongpunsawad,S. and Poovorawan,Y.

TITLE Direct Submission

JOURNAL Submitted (13-DEC-2016) Department of Pediatrics, Center of Excellence in Clinical Virology, Faculty of Medicine, Chulalongkorn University, Bangkok 10330, Thailand

COMMENT ##Assembly-Data-START##

Assembly Method :: DNASTAR-Lasergene v. 6  
Sequencing Technology :: Sanger dideoxy sequencing  
##Assembly-Data-END##

FEATURES Location/Qualifiers

source 1..600

/organism="Human respiratory syncytial virus A"  
/mol\_type="viral cRNA"  
/isolate="TH-CU477/2012"  
/host="Homo sapiens"  
/db\_xref="taxon:208893"  
/country="Thailand"  
/collection\_date="01-Oct-2012"  
/note="group: A"

CDS <1..600

/note="G protein"  
/codon\_start=1  
/product="attachment glycoprotein"  
/protein\_id="APY20303"  
/translation="ISFSNLSGTTTSQSTTILASTTPSAESTPQSTTVKIKNTTTTQIQ  
PSKPTTKQRQNKPNKPNNDFFHFVFNFVPCISCSNNPTCWAICKRIPNKKPGKKT  
KPTKKPTIKTTKKDPKPQTTPKPEVLTTKPTKPTIDTTKTNIRTTLLTSYTTGNPEH  
TSQEETLHSTTSEGNLSPSQVYTTSEYLSQSPSSSYTTK"

ORIGIN

1 atcagcttct ccaatctgtc cggaactaca tcacaatcca ccaccatact agcttcaaca  
61 acaccaagtg ctgagtcaac cccacaatcc acaacagtca agatcaaaaa cacaacaaca  
121 acccaataac aaccaagcaa acccaccaca aaacaacgcc aaaataaacc aaaaacaaa  
181 cccaacaatg attttcactt tgaagtgttc aactttgtac cctgcagcat atgcagcaac  
241 aatccaacct gctgggcat ctgcaagaga ataccaaca aaaaacctgg aaagaaaacc  
301 accaccaagc ccacaaaaaa accaaccatc aagacaacca aaaaagatcc caaacctcaa  
361 accacaaaac caaggaagt actcaccacc aagccacag aaaagccaac catcgacacc  
421 accaaaacaa acatcagaac tacactgtc acctctaca ccacagaaa tccagaacac  
481 acaagtcaag aggaaacct cactcaacc acctccgaag gcaatctaag cccatcaca  
541 gtctatacaa catccgagta cctatcaca tcccatctt catcctacac aacaaaatga

//

LOCUS KY327963 600 bp cRNA linear VRL 13-DEC-2016

DEFINITION Human respiratory syncytial virus A isolate TH-CU/C2599/2012 attachment glycoprotein gene, partial cds.

ACCESSION KY327963

VERSION KY327963

KEYWORDS .

SOURCE Human respiratory syncytial virus A

ORGANISM Human respiratory syncytial virus A

Viruses; ssRNA viruses; ssRNA negative-strand viruses; Mononegavirales; Pneumoviridae; Orthopneumovirus.

REFERENCE 1 (bases 1 to 600)

AUTHORS Thongpan,I., Mauleekoonphairoj,J., Vichiwattana,P., Korkong,S., Vongpunsawad,S. and Poovorawan,Y.

TITLE Molecular Characterization of Respiratory Syncytial Virus in Thailand, 2012-2015

JOURNAL Unpublished

REFERENCE 2 (bases 1 to 600)

AUTHORS Thongpan,I., Mauleekoonphairoj,J., Vichiwattana,P., Korkong,S., Vongpunsawad,S. and Poovorawan,Y.

TITLE Direct Submission

JOURNAL Submitted (13-DEC-2016) Department of Pediatrics, Center of Excellence in Clinical Virology, Faculty of Medicine, Chulalongkorn University, Bangkok 10330, Thailand

COMMENT ##Assembly-Data-START##

Assembly Method :: DNASTAR-Lasergene v. 6  
Sequencing Technology :: Sanger dideoxy sequencing  
##Assembly-Data-END##

FEATURES Location/Qualifiers

source 1..600

/organism="Human respiratory syncytial virus A"  
/mol\_type="viral cRNA"  
/isolate="TH-CU/C2599/2012"  
/host="Homo sapiens"  
/db\_xref="taxon:208893"  
/country="Thailand"  
/collection\_date="01-Feb-2012"  
/note="group: A"

CDS <1..600

/note="G protein"  
/codon\_start=1  
/product="attachment glycoprotein"  
/protein\_id="APY20304"  
/translation="ISFSNLSGTTSQSTTILASTTPSAESTPQSTTVKIKNTTTTQIQ  
PSKPTTKQRQNKPNNDFFHFEVFNFPVCSICSNNPTCWAICKRIPNKKPGKKT  
KPTKKPTIKTTKKDPKPQTTKPKVLTTPTEKPTINTTKTNIRTTLLTSYTTGNPEH  
TSQEETLHSTTSEGNISPSQVYTTSEYLSQSPSSSYTTK"

ORIGIN

1 atcagttct ccaatctgc cggaactaca tcacaatcca ccaccatact agettcaaca  
61 acaccaagtg ctgagtcaac cccacaatcc acaacagtea agatcaaaaa cacaacaaca  
121 acccaatac aacctagcaa acccaccaca aaacaacgcc aaaataaacc acaaaacaaa  
181 cccaacaatg attttactt tgaagtgtc aactttgtac cctgcagcat atgcagcaac  
241 aatccaacct gctgggcat ctgcaagaga ataccaaca aaaacctgg aaagaaaacc  
301 accaccaage ccacaaaaa accaaccate aagacaacca aaaaagatcc caaacctcaa  
361 accacaaaac caaggaagt actcaccacc aagcccacag aaaagccaac catcaacacc  
421 accaaaacaa acatcagaac tacactgtc acctctaca ccacaggaaa tccagaacac

481 acaagtcagg aggaaccct cactcaacc acctccgaag gcaatataag cccatcacia  
541 gtctatacaa catccgagta cctatcacia tetccatctt catcctacac aacaaaatga

//

LOCUS KY327964 600 bp cRNA linear VRL 13-DEC-2016  
DEFINITION Human respiratory syncytial virus A isolate TH-CU/C3035/2012  
attachment glycoprotein gene, partial cds.

ACCESSION KY327964

VERSION KY327964

KEYWORDS .

SOURCE Human respiratory syncytial virus A

ORGANISM Human respiratory syncytial virus A

Viruses; ssRNA viruses; ssRNA negative-strand viruses;  
Mononegavirales; Pneumoviridae; Orthopneumovirus.

REFERENCE 1 (bases 1 to 600)

AUTHORS Thongpan,I., Mauleekoonphairoj,J., Vichiwattana,P., Korkong,S.,  
Vongpunsawad,S. and Poovorawan,Y.

TITLE Molecular Characterization of Respiratory Syncytial Virus in  
Thailand, 2012-2015

JOURNAL Unpublished

REFERENCE 2 (bases 1 to 600)

AUTHORS Thongpan,I., Mauleekoonphairoj,J., Vichiwattana,P., Korkong,S.,  
Vongpunsawad,S. and Poovorawan,Y.

TITLE Direct Submission

JOURNAL Submitted (13-DEC-2016) Department of Pediatrics, Center of  
Excellence in Clinical Virology, Faculty of Medicine, Chulalongkorn  
University, Bangkok 10330, Thailand

COMMENT ##Assembly-Data-START##

Assembly Method :: DNASTAR-Lasergene v. 6  
Sequencing Technology :: Sanger dideoxy sequencing  
##Assembly-Data-END##

FEATURES Location/Qualifiers

source 1..600

/organism="Human respiratory syncytial virus A"  
/mol\_type="viral cRNA"  
/isolate="TH-CU/C3035/2012"  
/host="Homo sapiens"  
/db\_xref="taxon:208893"  
/country="Thailand"  
/collection\_date="01-Jul-2012"  
/note="group: A"

CDS <1..600

/note="G protein"  
/codon\_start=1  
/product="attachment glycoprotein"  
/protein\_id="APY20305"  
/translation="ISFSNLSGTTTSQSTTILASTTPSAESTPQSTTVKIKNTTTTQIQ  
PSKPTTKQRQNKPNKPNNDFFHFEVFNFPVCSICSNNPTCWAICKRIPNKKPGKTTT  
KPTKKPTIKTTKKDPKPQTTPKPEVLTTKPTKSTIDTTKTNIRTTLLTSYTTGNPEH  
TSQEETLHSTTSEGNISPSQVYTTSEYLSQSPSSSYTTQ"

ORIGIN

1 atcagcttct ccaatctgtc cggaactaca tcacaatcca ccaccatact agcttcaaca  
61 acaccaagtg ctgagtcaac cccacaatcc acaacagtca agatcaaaaa cacaacaaca  
121 acccaataac aacctagcaa acccaccaca aaacaacgcc aaaataaacc acaaaacaaa  
181 cccaacaatg atttctactt tgaagtgttc aactttgtac cctgcagcat atgcagcaac

241 aatccaacct gctgggceat ctgcaagaga ataccaaca aaaaacctgg aaagaaaacc  
301 accaccaagc ccacaaaaaa accaaccatc aagacaacca aaaaagatcc caaacctcaa  
361 accacaaaaac caaaggaagt actcaccacc aagcccacag aaaagtcaac catcgacacc  
421 accaaaaaca acatcagaac tacactgetc acctctaca ccacaggaaa tccagaacac  
481 acaagtcaag aggaaaccct cactcaacc acctccgaag gcaatataag cccatcaaa  
541 gtctatacaa catccgagta cctatcaaa tctcatctt catctacac aacacaatga

//

LOCUS KY327965 600 bp cRNA linear VRL 13-DEC-2016  
DEFINITION Human respiratory syncytial virus A isolate TH-CU/C2953/2012  
attachment glycoprotein gene, partial cds.

ACCESSION KY327965

VERSION KY327965

KEYWORDS .

SOURCE Human respiratory syncytial virus A

ORGANISM Human respiratory syncytial virus A

Viruses; ssRNA viruses; ssRNA negative-strand viruses;  
Mononegavirales; Pneumoviridae; Orthopneumovirus.

REFERENCE 1 (bases 1 to 600)

AUTHORS Thongpan,I., Mauleekoonphairoj,J., Vichiwattana,P., Korkong,S.,  
Vongpunsawad,S. and Poovorawan,Y.

TITLE Molecular Characterization of Respiratory Syncytial Virus in  
Thailand, 2012-2015

JOURNAL Unpublished

REFERENCE 2 (bases 1 to 600)

AUTHORS Thongpan,I., Mauleekoonphairoj,J., Vichiwattana,P., Korkong,S.,  
Vongpunsawad,S. and Poovorawan,Y.

TITLE Direct Submission

JOURNAL Submitted (13-DEC-2016) Department of Pediatrics, Center of  
Excellence in Clinical Virology, Faculty of Medicine, Chulalongkorn  
University, Bangkok 10330, Thailand

COMMENT ##Assembly-Data-START##

Assembly Method :: DNASTAR-Lasergene v. 6  
Sequencing Technology :: Sanger dideoxy sequencing  
##Assembly-Data-END##

FEATURES Location/Qualifiers

source 1..600

/organism="Human respiratory syncytial virus A"  
/mol\_type="viral cRNA"  
/isolate="TH-CU/C2953/2012"  
/host="Homo sapiens"  
/db\_xref="taxon:208893"  
/country="Thailand"  
/collection\_date="01-Jul-2012"  
/note="group: A"

CDS <1..600

/note="G protein"  
/codon\_start=1  
/product="attachment glycoprotein"  
/protein\_id="APY20306"  
/translation="ISFSNLSGTTSQSTTILASTTPSAESTPQSTTVKIKNTTTTQIQ  
PSKPTTKQRQNKPNKPNNDFFHFEVFNFVPCSICSNNTCWAICKRIPNKKPGKKT  
KPTKKPTIKTTKDPKPQTTPKPEVLTTKPTKPTIDTTKTNIRTTLLTSNTTGNPEH  
TSQEETLHSTTSEGNLSPSQVYTTSEYLSQSPSSSNTSK"

ORIGIN

1 atcagcttct ccaatctgtc cggaactaca tcacaatcca ccaccatact agcttcaaca  
61 acaccaagtg ctgagtcaac cccacaatcc acaacagtca agatcaaaaa cacaacaaca  
121 acccaaatac aacctageaa acccaccaca aaacaacgcc aaaataaacc acaaaacaaa  
181 cccaacaatg attttcactt tgaagtgttc aatthttgtac cctgcagcat atgcagcaac  
241 aatccaacct gctgggceat ctgcaagaga ataccaaaaca aaaaacctgg aaagaaaacc  
301 accaccaagc ccacaaaaaa accaaccatc aagacaacca aaaaagatcc caaacctcaa  
361 accacaaaaac caaaggaagt actcaccacc aagcccacag aaaagccaac catcgacacc  
421 accaaaaacaa acatcagaac tacactgtc acctccaaca ccacaggaaa tccagaacac  
481 acaagtcaag aggaaaccct cactcaacc acctccgaag gcaatctaag cccatcacia  
541 gtctatacaa catccgagta cctatcacia tctccatctt catccaacac atcaaatga

//

LOCUS KY327966 600 bp cRNA linear VRL 13-DEC-2016  
DEFINITION Human respiratory syncytial virus A isolate TH-CU/C3050/2012  
attachment glycoprotein gene, partial cds.

ACCESSION KY327966

VERSION KY327966

KEYWORDS .

SOURCE Human respiratory syncytial virus A

ORGANISM Human respiratory syncytial virus A

Viruses; ssRNA viruses; ssRNA negative-strand viruses;  
Mononegavirales; Pneumoviridae; Orthopneumovirus.

REFERENCE 1 (bases 1 to 600)

AUTHORS Thongpan,I., Mauleekoonphairoj,J., Vichiwattana,P., Korkong,S.,  
Vongpunsawad,S. and Poovorawan,Y.

TITLE Molecular Characterization of Respiratory Syncytial Virus in  
Thailand, 2012-2015

JOURNAL Unpublished

REFERENCE 2 (bases 1 to 600)

AUTHORS Thongpan,I., Mauleekoonphairoj,J., Vichiwattana,P., Korkong,S.,  
Vongpunsawad,S. and Poovorawan,Y.

TITLE Direct Submission

JOURNAL Submitted (13-DEC-2016) Department of Pediatrics, Center of  
Excellence in Clinical Virology, Faculty of Medicine, Chulalongkorn  
University, Bangkok 10330, Thailand

COMMENT ##Assembly-Data-START##

Assembly Method :: DNASTAR-Lasergene v. 6  
Sequencing Technology :: Sanger dideoxy sequencing  
##Assembly-Data-END##

FEATURES Location/Qualifiers

source 1..600

/organism="Human respiratory syncytial virus A"  
/mol\_type="viral cRNA"  
/isolate="TH-CU/C3050/2012"  
/host="Homo sapiens"  
/db\_xref="taxon:208893"  
/country="Thailand"  
/collection\_date="01-Jul-2012"  
/note="group: A"

CDS <1..600

/note="G protein"  
/codon\_start=1  
/product="attachment glycoprotein"  
/protein\_id="APY20307"  
/translation="ISFSNLSGTTTQSTTILASTTPSAESTPQSTTVKIKNTTTTQIQ"



PSKPTTKQRQNKPKQNKPNNDHFHFEVFNFPVPCSICSNNTCWAICKRIPNKKPGKTTT  
KPTKKPTIKTTKKDPKPQTTKPKEVLTTKPTEKPTIDTTKTNIRTTLLTSNTTGNPEH  
TSQEETLHSTTSEGNLSPSQVYTTSEYLSQSPSSSNTSK"

ORIGIN

1 atcagettet ccaatctgtc cggaactaca tcacaatcca ccaccatact agcttcaaca  
61 acaccaagtg ctgagtcaac cccacaatcc acaacagtca agatcaaaaa cacaacaaca  
121 acccaaatac aacctageaa acccaccaca aaacaacgcc aaaataaacc acaaaacaaa  
181 cccaacaatg attttcactt tgaagtgttc aattttgtac cctgcagcat atgcagcaac  
241 aatccaacct gctgggceat ctgcaagaga ataccaaca aaaaacctgg aaagaaaacc  
301 accaccaagc ccacaaaaaa accaaccatc aagacaacca aaaaagatcc caaacctcaa  
361 accacaaaaac caaaggaagt actcaccacc aagcccacag aaaagccaac catcgacacc  
421 accaaaaacaa acatcagaac tacactgtc acctccaaca ccacaggaaa tccagaacac  
481 acaagtcaag aggaaaccct cactcaacc acctccgaag gcaatctaag cccatcacia  
541 gtctatacaa catccgagta cctatcacia tctcatctt catccaacac atcaaatga

//

LOCUS KY327967 600 bp cRNA linear VRL 13-DEC-2016

DEFINITION Human respiratory syncytial virus A isolate TH-CU/C3146/2012  
attachment glycoprotein gene, partial cds.

ACCESSION KY327967

VERSION KY327967

KEYWORDS .

SOURCE Human respiratory syncytial virus A

ORGANISM Human respiratory syncytial virus A

Viruses; ssRNA viruses; ssRNA negative-strand viruses;  
Mononegavirales; Pneumoviridae; Orthopneumovirus.

REFERENCE 1 (bases 1 to 600)

AUTHORS Thongpan,I., Mauleekoonphairoj,J., Vichiwattana,P., Korkong,S.,  
Vongpunsawad,S. and Poovorawan,Y.

TITLE Molecular Characterization of Respiratory Syncytial Virus in  
Thailand, 2012-2015

JOURNAL Unpublished

REFERENCE 2 (bases 1 to 600)

AUTHORS Thongpan,I., Mauleekoonphairoj,J., Vichiwattana,P., Korkong,S.,  
Vongpunsawad,S. and Poovorawan,Y.

TITLE Direct Submission

JOURNAL Submitted (13-DEC-2016) Department of Pediatrics, Center of  
Excellence in Clinical Virology, Faculty of Medicine, Chulalongkorn  
University, Bangkok 10330, Thailand

COMMENT ##Assembly-Data-START##

Assembly Method :: DNASTAR-Lasergene v. 6  
Sequencing Technology :: Sanger dideoxy sequencing  
##Assembly-Data-END##

FEATURES Location/Qualifiers

source 1..600  
/organism="Human respiratory syncytial virus A"  
/mol\_type="viral cRNA"  
/isolate="TH-CU/C3146/2012"  
/host="Homo sapiens"  
/db\_xref="taxon:208893"  
/country="Thailand"  
/collection\_date="01-Sep-2012"  
/note="group: A"

CDS <1..600  
/note="G protein"

/codon\_start=1  
/product="attachment glycoprotein"  
/protein\_id="APY20308"  
/translation="ISFSNLSGTTTSQSTTILASTTPSAESTPQSTTVKIKNTTTTQIQ  
PSKPTTKQRQNKPKQNKPNDFHFEVFNFPVCSICSNNPTCWAICKRIPNKKPGKKT  
KPTKKPTIKTTKKDPKPQTTKPKVLLTKPTEKPTIDTTKTNIRTTLLTSNTTGNPEH  
TSQEETLHSTTSEGNLSPSQVYTTSEYLSQSPSSSNTSK"

ORIGIN

1 atcagcttct ccaatctgtc cggaactaca tcacaatcca ccaccatact agcttcaaca  
61 acaccaagtg ctgagtcaac cccacaatcc acaacagtca agatcaaaaa cacaacaaca  
121 acccaaatac aacctageaa acccaccaca aaacaacgcc aaaataaacc acaaaacaaa  
181 cccaacaatg attttcactt tgaagtgttc aatthttgtac cctgcagcat atgcagcaac  
241 aatccaacct gctgggcat ctgcaagaga ataccaaca aaaaacctgg aaagaaaacc  
301 accaccaagc ccacaaaaaa accaaccatc aagacaacca aaaaagatcc caaacctcaa  
361 accacaaaaac caaaggaagt actcaccacc aagcccacag aaaagccaac catcgacacc  
421 accaaaaacaa acatcagaac tacactgtc acctcaaca ccacaggaaa tccagaacac  
481 acaagtcaag aggaaaccct cactcaacc acctccgaag gcaatctaag cccatcacia  
541 gtctatacaa catccgagta cctatcacia tctccatctt catccaacac atcaaatga

//  
LOCUS KY327968 600 bp cRNA linear VRL 13-DEC-2016  
DEFINITION Human respiratory syncytial virus A isolate TH-CU/C3247/2012  
attachment glycoprotein gene, partial cds.

ACCESSION KY327968

VERSION KY327968

KEYWORDS .

SOURCE Human respiratory syncytial virus A

ORGANISM Human respiratory syncytial virus A

Viruses; ssRNA viruses; ssRNA negative-strand viruses;  
Mononegavirales; Pneumoviridae; Orthopneumovirus.

REFERENCE 1 (bases 1 to 600)

AUTHORS Thongpan,I., Mauleekoonphairoj,J., Vichiwattana,P., Korkong,S.,  
Vongpunsawad,S. and Poovorawan,Y.

TITLE Molecular Characterization of Respiratory Syncytial Virus in  
Thailand, 2012-2015

JOURNAL Unpublished

REFERENCE 2 (bases 1 to 600)

AUTHORS Thongpan,I., Mauleekoonphairoj,J., Vichiwattana,P., Korkong,S.,  
Vongpunsawad,S. and Poovorawan,Y.

TITLE Direct Submission

JOURNAL Submitted (13-DEC-2016) Department of Pediatrics, Center of  
Excellence in Clinical Virology, Faculty of Medicine, Chulalongkorn  
University, Bangkok 10330, Thailand

COMMENT ##Assembly-Data-START##

Assembly Method :: DNASTAR-Lasergene v. 6  
Sequencing Technology :: Sanger dideoxy sequencing  
##Assembly-Data-END##

FEATURES Location/Qualifiers

source 1..600

/organism="Human respiratory syncytial virus A"  
/mol\_type="viral cRNA"  
/isolate="TH-CU/C3247/2012"  
/host="Homo sapiens"  
/db\_xref="taxon:208893"  
/country="Thailand"

/collection\_date="01-Sep-2012"  
/note="group: A"  
CDS <1..600  
/note="G protein"  
/codon\_start=1  
/product="attachment glycoprotein"  
/protein\_id="APY20309"  
/translation="ISFSNLSGTTSQSTTILASTTPSAESTPQSTTVKIKNTTTTQIQ  
PSKPTTKQRQNKPNKPNDFHFEVFNFPVCSICSNNPTCWAICKRIPNKKPGKTTT  
KPTKKPTIKTTKKDPKPQTTKPKEVLTTKPTEKPTIDTTKTNIRTTLLTSNTTGNPEH  
TSQEETLHSTTSEGNLSPSQVYTTSEYLSQSPSSSNTSK"

ORIGIN

1 atcagcttct ccaatctgtc cggaactaca tcacaatcca ccaccatact agcttcaaca  
61 acaccaagtg ctgagtcaac cccacaatcc acaacagtca agatcaaaaa cacaacaaca  
121 acccaaatac aacctageaa acccaccaca aaacaacgcc aaaataaacc acaaaacaaa  
181 cccaacaatg attttcactt tgaagtgttc aattttgtac cctgcagcat atgcagcaac  
241 aatccaacct gctgggceat ctgcaagaga ataccaaca aaaaacctgg aaagaaaacc  
301 accaccaagc ccacaaaaaa accaaccatc aagacaacca aaaaagatcc caaacctcaa  
361 accacaaaaac caaaggaagt actcaccacc aagcccacag aaaagccaac catcgacacc  
421 accaaaaacaa acatcagaac tacactgtc acctccaaca ccacaggaaa tccagaacac  
481 acaagtcaag aggaaaccct cactcaacc acctccgaag gcaatctaag cccatcaaca  
541 gtctatacaa catccgagta cctatcaaca tetccatctt catccaacac atcaaatga

//

LOCUS KY327969 600 bp cRNA linear VRL 13-DEC-2016  
DEFINITION Human respiratory syncytial virus A isolate TH-CU/C3057/2012  
attachment glycoprotein gene, partial cds.

ACCESSION KY327969

VERSION KY327969

KEYWORDS .

SOURCE Human respiratory syncytial virus A

ORGANISM Human respiratory syncytial virus A

Viruses; ssRNA viruses; ssRNA negative-strand viruses;  
Mononegavirales; Pneumoviridae; Orthopneumovirus.

REFERENCE 1 (bases 1 to 600)

AUTHORS Thongpan,I., Mauleekoonphairoj,J., Vichiwattana,P., Korkong,S.,  
Vongpunsawad,S. and Poovorawan,Y.

TITLE Molecular Characterization of Respiratory Syncytial Virus in  
Thailand, 2012-2015

JOURNAL Unpublished

REFERENCE 2 (bases 1 to 600)

AUTHORS Thongpan,I., Mauleekoonphairoj,J., Vichiwattana,P., Korkong,S.,  
Vongpunsawad,S. and Poovorawan,Y.

TITLE Direct Submission

JOURNAL Submitted (13-DEC-2016) Department of Pediatrics, Center of  
Excellence in Clinical Virology, Faculty of Medicine, Chulalongkorn  
University, Bangkok 10330, Thailand

COMMENT ##Assembly-Data-START##

Assembly Method :: DNASTAR-Lasergene v. 6  
Sequencing Technology :: Sanger dideoxy sequencing  
##Assembly-Data-END##

FEATURES Location/Qualifiers

source 1..600

/organism="Human respiratory syncytial virus A"  
/mol\_type="viral cRNA"

/isolate="TH-CU/C3057/2012"  
/host="Homo sapiens"  
/db\_xref="taxon:208893"  
/country="Thailand"  
/collection\_date="01-Aug-2012"  
/note="group: A"

CDS

<1..600  
/note="G protein"  
/codon\_start=1  
/product="attachment glycoprotein"  
/protein\_id="APY20310"  
/translation="ISFSNLSGTTTSQSTTILASTTPSAESTPQSTTVKIKNTTTTQIQ  
PSKPTTKQRQNKPKQNKPNDFHFEVFNFPVCSICSNNPTCWAICKRIPNKKPGKKT  
KPTKKPTIKTTKKDPKPQTTKPKVLLTKPTEKPTIDTTKTNIRTTLLTSNTTGNPEH  
TSQEETLHSTTSEGNLSPSQVYTTSEYLSQSPSSSNTSK"

ORIGIN

1 atcagcttct ccaatctgtc cggaactaca tcacaatcca ccaccatact agcttcaaca  
61 acaccaagtg ctgagtcaac cccacaatcc acaacagtca agatcaaaaa cacaacaaca  
121 acccaaatac aacctageaa acccaccaca aaacaacgcc aaaataaacc acaaaacaaa  
181 cccaacaatg attttcactt tgaagtgttc aatthttgtac cctgcagcat atgcagcaac  
241 aatccaacct gctgggceat ctgcaagaga ataccaaaaa aaaaacctgg aaagaaaacc  
301 accaccaagc ccacaaaaaa accaaccatc aagacaacca aaaagatcc caaacctcaa  
361 accacaaaaac caaaggaagt actcaccacc aagcccacag aaaagccaac catcgacacc  
421 accaaaaacaa acatcagaac tacactgtc acctcaaca ccacaggaaa tccagaacac  
481 acaagtcaag aggaaaccct cactcaacc acctccgaag gcaatctaag cccatcacia  
541 gtctatacaa catccgagta cctatcacia tctccatctt catccaacac atcaaatga

//

LOCUS KY327970 600 bp cRNA linear VRL 13-DEC-2016  
DEFINITION Human respiratory syncytial virus A isolate TH-CU/C3176/2012  
attachment glycoprotein gene, partial cds.

ACCESSION KY327970

VERSION KY327970

KEYWORDS .

SOURCE Human respiratory syncytial virus A

ORGANISM Human respiratory syncytial virus A

Viruses; ssRNA viruses; ssRNA negative-strand viruses;  
Mononegavirales; Pneumoviridae; Orthopneumovirus.

REFERENCE 1 (bases 1 to 600)

AUTHORS Thongpan,I., Mauleekoonphairoj,J., Vichiwattana,P., Korkong,S.,  
Vongpunsawad,S. and Poovorawan,Y.

TITLE Molecular Characterization of Respiratory Syncytial Virus in  
Thailand, 2012-2015

JOURNAL Unpublished

REFERENCE 2 (bases 1 to 600)

AUTHORS Thongpan,I., Mauleekoonphairoj,J., Vichiwattana,P., Korkong,S.,  
Vongpunsawad,S. and Poovorawan,Y.

TITLE Direct Submission

JOURNAL Submitted (13-DEC-2016) Department of Pediatrics, Center of  
Excellence in Clinical Virology, Faculty of Medicine, Chulalongkorn  
University, Bangkok 10330, Thailand

COMMENT ##Assembly-Data-START##

Assembly Method :: DNASTAR-Lasergene v. 6  
Sequencing Technology :: Sanger dideoxy sequencing  
##Assembly-Data-END##

FEATURES            Location/Qualifiers  
 source            1..600  
                   /organism="Human respiratory syncytial virus A"  
                   /mol\_type="viral cRNA"  
                   /isolate="TH-CU/C3176/2012"  
                   /host="Homo sapiens"  
                   /db\_xref="taxon:208893"  
                   /country="Thailand"  
                   /collection\_date="01-Sep-2012"  
                   /note="group: A"  
 CDS                <1..600  
                   /note="G protein"  
                   /codon\_start=1  
                   /product="attachment glycoprotein"  
                   /protein\_id="APY20311"  
                   /translation="ISFSNLSGTTTSQSTTILASTTPSAESTPQSTTVKIKNTTTTQIQ  
 PSKPTTKQRQNKPKQNKPNDFHFEVFNFPVCSICSNNPTCWAICKRIPNKKPGKTTT  
 KPTKKPTIKTTKKDKPKPQTTKPKEVLTTKPTEKPTIDTTKTNIRTTLLTSNTTGNPEH  
 TSQEETLHSTTSEGNLSPSQVYTTSEYLSQSPSSSNTSK"

ORIGIN

1 atcagcttct ccaatctgtc cggaactaca tcacaatcca ccaccatact agcttcaaca  
 61 acaccaagtg ctgagtcaac cccacaatcc acaacagtca agatcaaaaa cacaacaaca  
 121 acccaaatac aacctageaa acccaccaca aaacaacgcc aaaataaacc acaaaacaaa  
 181 cccaacaatg attttcactt tgaagtgttc aatthttgtac cctgcagcat atgcagcaac  
 241 aatccaacct gctgggceat ctgcaagaga ataccaaca aaaaacctgg aaagaaaacc  
 301 accaccaagc ccacaaaaaa accaaccatc aagacaacca aaaaagatcc caaacctcaa  
 361 accacaaaaac caaaggaagt actcaccacc aagcccacag aaaagccaac catcgacacc  
 421 accaaaaacaa acatcagaac tacactgtc acctccaaca ccacaggaaa tccagaacac  
 481 acaagtcaag aggaaaccct cactcaacc acctccgaag gcaatctaag cccatcaaca  
 541 gtctatacaa catccgagta cctatcaaca tetccatctt catccaacac atcaaatga

//  
 LOCUS    KY327971            600 bp    cRNA    linear    VRL 13-DEC-2016

DEFINITION Human respiratory syncytial virus A isolate TH-CU436/2012  
 attachment glycoprotein gene, partial cds.

ACCESSION    KY327971

VERSION      KY327971

KEYWORDS     .

SOURCE      Human respiratory syncytial virus A

ORGANISM    Human respiratory syncytial virus A  
               Viruses; ssRNA viruses; ssRNA negative-strand viruses;  
               Mononegavirales; Pneumoviridae; Orthopneumovirus.

REFERENCE    1 (bases 1 to 600)

AUTHORS     Thongpan,I., Mauleekoonphairoj,J., Vichiwattana,P., Korkong,S.,  
               Vongpunsawad,S. and Poovorawan,Y.

TITLE        Molecular Characterization of Respiratory Syncytial Virus in  
               Thailand, 2012-2015

JOURNAL     Unpublished

REFERENCE    2 (bases 1 to 600)

AUTHORS     Thongpan,I., Mauleekoonphairoj,J., Vichiwattana,P., Korkong,S.,  
               Vongpunsawad,S. and Poovorawan,Y.

TITLE        Direct Submission

JOURNAL     Submitted (13-DEC-2016) Department of Pediatrics, Center of  
               Excellence in Clinical Virology, Faculty of Medicine, Chulalongkorn  
               University, Bangkok 10330, Thailand

COMMENT ##Assembly-Data-START##

Assembly Method :: DNASTAR-Lasergene v. 6  
Sequencing Technology :: Sanger dideoxy sequencing  
##Assembly-Data-END##

FEATURES Location/Qualifiers

source 1..600

/organism="Human respiratory syncytial virus A"  
/mol\_type="viral cRNA"  
/isolate="TH-CU436/2012"  
/host="Homo sapiens"  
/db\_xref="taxon:208893"  
/country="Thailand"  
/collection\_date="01-Sep-2012"  
/note="group: A"

CDS <1..600

/note="G protein"  
/codon\_start=1  
/product="attachment glycoprotein"  
/protein\_id="APY20312"  
/translation="ISFSNLSGTTTSQSTTILASTTPSAESTPQSTTVKIKNTTTTQIQ  
PSKPTTKQRQNKPNKPNNDFFHEVFNFPVCSICSNNPTCWAICKRIPNKKPGKTTT  
KPTKKPTIKTTKKDPKPQTTKPKVLLTKPTEKPTIDTTKTNIRTTLLTSNTTGNPEH  
TSQEETLHSTTSEGNLSPSQVYTTSEYLSQSPSSSNTSK"

ORIGIN

1 atcagcttct ccaatctgtc cggaactaca tcacaatcca ccaccatact agcttcaaca  
61 acaccaagtg ctgagtcaac cccacaatcc acaacagtca agatcaaaaa cacaacaaca  
121 acccaaatac aacctageaa acccaccaca aaacaacgcc aaaataaacc acaaaacaaa  
181 cccaacaatg attttcactt tgaagtgttc aatthttgtac cctgcagcat atgcagcaac  
241 aatccaacct gctgggceat ctgcaagaga ataccaaaaa aaaaacctgg aaagaaaacc  
301 accaccaagc ccacaaaaaa accaaccatc aagacaacca aaaagatcc caaacctcaa  
361 accacaaaaac caaaggaagt actcaccacc aagcccacag aaaagccaac catcgacacc  
421 accaaaaacaa acatcagaac tacactgtc acctccaaca ccacaggaaa tccagaacac  
481 acaagtcaag aggaaaccct cactcaacc acctccgaag gcaatctaag cccatcacia  
541 gtctatacaa catccgagta cctatcacia tctccatctt catccaacac atcaaatga

//

LOCUS KY327972 600 bp cRNA linear VRL 13-DEC-2016

DEFINITION Human respiratory syncytial virus A isolate TH-CU488/2012  
attachment glycoprotein gene, partial cds.

ACCESSION KY327972

VERSION KY327972

KEYWORDS .

SOURCE Human respiratory syncytial virus A

ORGANISM Human respiratory syncytial virus A

Viruses; ssRNA viruses; ssRNA negative-strand viruses;  
Mononegavirales; Pneumoviridae; Orthopneumovirus.

REFERENCE 1 (bases 1 to 600)

AUTHORS Thongpan,I., Mauleekoonphairoj,J., Vichiwattana,P., Korkong,S.,  
Vongpunsawad,S. and Poovorawan,Y.

TITLE Molecular Characterization of Respiratory Syncytial Virus in  
Thailand, 2012-2015

JOURNAL Unpublished

REFERENCE 2 (bases 1 to 600)

AUTHORS Thongpan,I., Mauleekoonphairoj,J., Vichiwattana,P., Korkong,S.,  
Vongpunsawad,S. and Poovorawan,Y.

TITLE Direct Submission  
JOURNAL Submitted (13-DEC-2016) Department of Pediatrics, Center of Excellence in Clinical Virology, Faculty of Medicine, Chulalongkorn University, Bangkok 10330, Thailand  
COMMENT ##Assembly-Data-START##  
Assembly Method :: DNASTAR-Lasergene v. 6  
Sequencing Technology :: Sanger dideoxy sequencing  
##Assembly-Data-END##  
FEATURES Location/Qualifiers  
source 1..600  
/organism="Human respiratory syncytial virus A"  
/mol\_type="viral cRNA"  
/isolate="TH-CU488/2012"  
/host="Homo sapiens"  
/db\_xref="taxon:208893"  
/country="Thailand"  
/collection\_date="01-Oct-2012"  
/note="group: A"  
CDS <1..600  
/note="G protein"  
/codon\_start=1  
/product="attachment glycoprotein"  
/protein\_id="APY20313"  
/translation="ISFSNLSGTTTSQSTTILASTTPSAESTPQSTTVKIKNTTTTQIQ  
PSKPTTKQRQNKPNKPNNDFFHEVFNFVPCISCSNNTPCWAICKRIPNKKPGKTTT  
KPTKKPTIKTTKKDPKPQTTKPKEVLTTKPTEKPTIDTTKTNIRTTLLTSNTTGNPEH  
TSQEETLHSTTSEGNLSPSQVYTTSEYLSQSPSSSNTSK"  
ORIGIN  
1 atcagcttct ccaatctgtc cggaactaca tcacaatcca ccaccatact agcttcaaca  
61 acaccaagtg ctgagtcaac cccacaatcc acaacagtca agatcaaaaa cacaacaaca  
121 acccaaatac aacctageaa acccaccaca aaacaacgcc aaaataaacc acaaaacaaa  
181 cccaacaatg attttcactt tgaagtgttc aattttgtac cctgcagcat atgcagcaac  
241 aatccaacct gctgggceat ctgcaagaga ataccaaca aaaaacctgg aaagaaaacc  
301 accaccaagc ccacaaaaaa accaaccatc aagacaacca aaaaagatcc caaacctcaa  
361 accacaaaaac caaaggaagt actcaccacc aagcccacag aaaagccaac catcgacacc  
421 accaaaaacaa acatcagaac tacactgtct acctccaaca ccacaggaaa tccagaacac  
481 acaagtcaag aggaaaccct cactcaacc acctccgaag gcaatctaag cccatcacia  
541 gtctatacaa catccgagta cctatcacia tctccatctt catccaacac atcaaatga  
//  
LOCUS KY327973 600 bp cRNA linear VRL 13-DEC-2016  
DEFINITION Human respiratory syncytial virus A isolate TH-CU/C3132/2012  
attachment glycoprotein gene, partial cds.  
ACCESSION KY327973  
VERSION KY327973  
KEYWORDS .  
SOURCE Human respiratory syncytial virus A  
ORGANISM Human respiratory syncytial virus A  
Viruses; ssRNA viruses; ssRNA negative-strand viruses;  
Mononegavirales; Pneumoviridae; Orthopneumovirus.  
REFERENCE 1 (bases 1 to 600)  
AUTHORS Thongpan,I., Mauleekoonphairoj,J., Vichiwattana,P., Korkong,S.,  
Vongpunawad,S. and Poovorawan,Y.  
TITLE Molecular Characterization of Respiratory Syncytial Virus in  
Thailand, 2012-2015

JOURNAL Unpublished  
REFERENCE 2 (bases 1 to 600)  
AUTHORS Thongpan,I., Mauleekoonphairoj,J., Vichiwattana,P., Korkong,S.,  
Vongpunsawad,S. and Poovorawan,Y.  
TITLE Direct Submission  
JOURNAL Submitted (13-DEC-2016) Department of Pediatrics, Center of  
Excellence in Clinical Virology, Faculty of Medicine, Chulalongkorn  
University, Bangkok 10330, Thailand  
COMMENT ##Assembly-Data-START##  
Assembly Method :: DNASTAR-Lasergene v. 6  
Sequencing Technology :: Sanger dideoxy sequencing  
##Assembly-Data-END##  
FEATURES Location/Qualifiers  
source 1..600  
/organism="Human respiratory syncytial virus A"  
/mol\_type="viral cRNA"  
/isolate="TH-CU/C3132/2012"  
/host="Homo sapiens"  
/db\_xref="taxon:208893"  
/country="Thailand"  
/collection\_date="01-Aug-2012"  
/note="group: A"  
CDS <1..600  
/note="G protein"  
/codon\_start=1  
/product="attachment glycoprotein"  
/protein\_id="APY20314"  
/translation="ISFSNLSGTTTSQSTTILASTTPSAESTPQSTTVKIKNTTTTQIQ  
PSKPTTKQRQNKPKQNKPNDFHFEVFNFPVPCISCSNNPTCWAICKRIPNKKPGKKT  
KPTKKPTIKTTKKDPKPQTTKPKVLLTKPTEKPTIDTTKTNIRTTLLTSNTTGNPEH  
TSQEETLHSTTSEGNLSPSQVYTTSEYLSQSPSSSNTSK"  
ORIGIN  
1 atcagcttct ccaatctgtc cggaactaca tcacaatcca ccaccatact agcttcaaca  
61 acaccaagtg ctgagtcaac cccacaatcc acaacagtca agatcaaaaa cacaacaaca  
121 acccaaatac aacctageaa acccaccaca aaacaacgcc aaaataaacc acaaaacaaa  
181 cccaacaatg attttcactt tgaagtgttc aatthttgtac cctgcagcat atgcagcaac  
241 aatccaacct gctgggceat ctgcaagaga ataccaacaa aaaaacctgg aaagaaaacc  
301 accaccaagc ccacaaaaaa accaaccatc aagacaacca aaaagatcc caaacctcaa  
361 accacaaaaac caaaggaagt actcaccacc aagcccacag aaaagccaac catcgacacc  
421 accaaaaacaa acatcagaac tacactgtc acctccaaca ccacaggaaa tccagaacac  
481 acaagtcaag aggaaaccct cactcaacc acctccgaag gcaatctaag cccatcaaa  
541 gtctatacaa catccgagta cctatcaaa tetccatctt catccaacac atcaaatga  
//  
LOCUS KY327974 600 bp cRNA linear VRL 13-DEC-2016  
DEFINITION Human respiratory syncytial virus A isolate TH-CU/C3033/2012  
attachment glycoprotein gene, partial cds.  
ACCESSION KY327974  
VERSION KY327974  
KEYWORDS .  
SOURCE Human respiratory syncytial virus A  
ORGANISM Human respiratory syncytial virus A  
Viruses; ssRNA viruses; ssRNA negative-strand viruses;  
Mononegavirales; Pneumoviridae; Orthopneumovirus.  
REFERENCE 1 (bases 1 to 600)



AUTHORS Thongpan,I., Mauleekoonphairoj,J., Vichiwattana,P., Korkong,S.,  
Vongpunsawad,S. and Poovorawan,Y.

TITLE Molecular Characterization of Respiratory Syncytial Virus in  
Thailand, 2012-2015

JOURNAL Unpublished

REFERENCE 2 (bases 1 to 600)

AUTHORS Thongpan,I., Mauleekoonphairoj,J., Vichiwattana,P., Korkong,S.,  
Vongpunsawad,S. and Poovorawan,Y.

TITLE Direct Submission

JOURNAL Submitted (13-DEC-2016) Department of Pediatrics, Center of  
Excellence in Clinical Virology, Faculty of Medicine, Chulalongkorn  
University, Bangkok 10330, Thailand

COMMENT ##Assembly-Data-START##

Assembly Method :: DNASTAR-Lasergene v. 6  
Sequencing Technology :: Sanger dideoxy sequencing  
##Assembly-Data-END##

FEATURES Location/Qualifiers

source 1..600  
/organism="Human respiratory syncytial virus A"  
/mol\_type="viral cRNA"  
/isolate="TH-CU/C3033/2012"  
/host="Homo sapiens"  
/db\_xref="taxon:208893"  
/country="Thailand"  
/collection\_date="01-Jul-2012"  
/note="group: A"

CDS <1..600  
/note="G protein"  
/codon\_start=1  
/product="attachment glycoprotein"  
/protein\_id="APY20315"  
/translation="ISFSNLSGTTTSQSTTILASTTPSAESTPQSTTVKIKNTTTTQIQ  
PSKPTTKQRQNKPNKPNNDFFHEVFNFPVCSICSNNPTCWAICKRIPNKKPGKTTT  
KPTKKPTIKTTKKDPKPQTTKPKEVLTTKPTKEPTIDTTKTNIRTTLLTSNTTGNPEH  
TSQEETLHSTTSEGNLSPSQVYTTSEYLSQSPSSSNTSK"

ORIGIN

1 atcagcttct ccaatctgtc cggaactaca tcacaatcca ccaccatact agcttcaaca  
61 acaccaagtg ctgagtcaac cccacaatcc acaacagtca agatcaaaaa cacaacaaca  
121 acccaaatac aacctageaa acccaccaca aaacaacgcc aaaataaacc acaaaacaaa  
181 cccaacaatg attttcactt tgaagtgttc aattttgtac cctgcagcat atgcagcaac  
241 aatccaacct gctgggacct ctgcaagaga ataccaaca aaaaacctgg aaagaaaacc  
301 accaccaagc ccacaaaaaa accaaccatc aagacaacca aaaaagatcc caaacctcaa  
361 accacaaaac caaaggaagt actcaccacc aagccacag aaaagccaac catcgacacc  
421 accaaaacaa acatcagaac tacactgetc acctccaaca ccacaggaaa tccagaacac  
481 acaagtcaag aggaaaccct cactcaacc acctccgaag gcaatctaag cccatcacia  
541 gtctatacaa catccgagta cctatcacia tetccatctt catccaacac atcaaatga

//

LOCUS KY327975 600 bp cRNA linear VRL 13-DEC-2016

DEFINITION Human respiratory syncytial virus A isolate TH-CU/C3188/2012  
attachment glycoprotein gene, partial cds.

ACCESSION KY327975

VERSION KY327975

KEYWORDS .

SOURCE Human respiratory syncytial virus A

ORGANISM Human respiratory syncytial virus A  
Viruses; ssRNA viruses; ssRNA negative-strand viruses;  
Mononegavirales; Pneumoviridae; Orthopneumovirus.

REFERENCE 1 (bases 1 to 600)

AUTHORS Thongpan,I., Mauleekoonphairoj,J., Vichiwattana,P., Korkong,S.,  
Vongpunsawad,S. and Poovorawan,Y.

TITLE Molecular Characterization of Respiratory Syncytial Virus in  
Thailand, 2012-2015

JOURNAL Unpublished

REFERENCE 2 (bases 1 to 600)

AUTHORS Thongpan,I., Mauleekoonphairoj,J., Vichiwattana,P., Korkong,S.,  
Vongpunsawad,S. and Poovorawan,Y.

TITLE Direct Submission

JOURNAL Submitted (13-DEC-2016) Department of Pediatrics, Center of  
Excellence in Clinical Virology, Faculty of Medicine, Chulalongkorn  
University, Bangkok 10330, Thailand

COMMENT ##Assembly-Data-START##

Assembly Method :: DNASTAR-Lasergene v. 6  
Sequencing Technology :: Sanger dideoxy sequencing  
##Assembly-Data-END##

FEATURES Location/Qualifiers

source 1..600

/organism="Human respiratory syncytial virus A"  
/mol\_type="viral cRNA"  
/isolate="TH-CU/C3188/2012"  
/host="Homo sapiens"  
/db\_xref="taxon:208893"  
/country="Thailand"  
/collection\_date="01-Sep-2012"  
/note="group: A"

CDS <1..600

/note="G protein"  
/codon\_start=1  
/product="attachment glycoprotein"  
/protein\_id="APY20316"  
/translation="VSFSNLSGTTTSQSTTILASTTPSAESTPQSTTVKIKNTTTTQIQ  
PSKPTTKQRQNKPKQNKPNDFHFEVFNFPVCSICSNNPTCWAICKRIPNKKPGKKT  
KPTKKPTIKTTKKDPKPQTTKPKVLLTKPTEKPTIDTTKTNIRTTLLTSNTTGNPEH  
TSQEETLHSTTSEGNLSPSQVYTTSEYLSQSPSSSNTSK"

ORIGIN

1 gtcagcttct ccaatctgtc cggaactaca tcacaatcca ccaccatact agcttcaaca  
61 acaccaagtg ctgagtcaac cccacaatcc acaacagtca agatcaaaaa cacaacaaca  
121 acccaaatac aacctageaa acccaccaca aaacaacgcc aaaataaacc acaaaacaaa  
181 cccaacaatg attttcactt tgaagtgttc aatthttgtac cctgcagcat atgcagcaac  
241 aatccaacct gctgggceat ctgcaagaga ataccaaaaa aaaaacctgg aaagaaaacc  
301 accaccaagc ccacaaaaaa accaaccatc aagacaacca aaaagatcc caaacctcaa  
361 accacaaaaac caaaggaagt actcaccacc aagcccacag aaaagccaac catcgacacc  
421 accaaaaaaa acatcagaac tacactgtc acctccaaca ccacaggaaa tccagaacac  
481 acaagtcaag aggaaaccct cactcaacc acctccgaag gcaatctaag cccatcacia  
541 gtctatacaa catccgagta cctatcacia tetccatctt catccaacac atcaaatga

//

LOCUS KY327976 600 bp cRNA linear VRL 13-DEC-2016

DEFINITION Human respiratory syncytial virus A isolate TH-CU411/2012  
attachment glycoprotein gene, partial cds.

ACCESSION KY327976

VERSION KY327976

KEYWORDS .

SOURCE Human respiratory syncytial virus A

ORGANISM Human respiratory syncytial virus A

Viruses; ssRNA viruses; ssRNA negative-strand viruses;  
Mononegavirales; Pneumoviridae; Orthopneumovirus.

REFERENCE 1 (bases 1 to 600)

AUTHORS Thongpan,I., Mauleekoonphairoj,J., Vichiwattana,P., Korkong,S.,  
Vongpunsawad,S. and Poovorawan,Y.

TITLE Molecular Characterization of Respiratory Syncytial Virus in  
Thailand, 2012-2015

JOURNAL Unpublished

REFERENCE 2 (bases 1 to 600)

AUTHORS Thongpan,I., Mauleekoonphairoj,J., Vichiwattana,P., Korkong,S.,  
Vongpunsawad,S. and Poovorawan,Y.

TITLE Direct Submission

JOURNAL Submitted (13-DEC-2016) Department of Pediatrics, Center of  
Excellence in Clinical Virology, Faculty of Medicine, Chulalongkorn  
University, Bangkok 10330, Thailand

COMMENT ##Assembly-Data-START##

Assembly Method :: DNASTAR-Lasergene v. 6  
Sequencing Technology :: Sanger dideoxy sequencing  
##Assembly-Data-END##

FEATURES Location/Qualifiers

source 1..600

/organism="Human respiratory syncytial virus A"  
/mol\_type="viral cRNA"  
/isolate="TH-CU411/2012"  
/host="Homo sapiens"  
/db\_xref="taxon:208893"  
/country="Thailand"  
/collection\_date="01-Aug-2012"  
/note="group: A"

CDS <1..600

/note="G protein"  
/codon\_start=1  
/product="attachment glycoprotein"  
/protein\_id="APY20317"  
/translation="ISFSNLSGTTTSQSTTILASTTPSAESTPQSTTVKIKNTTTTQIQ  
PSKPTTKQRQNKPNKPNNDFFHFVFNFPVPCISCSNNTPCWAICKRIPNKKPGKTTT  
KPTKKPTIKTTKKDPKPQTTKPKEVLTTKPKTEKPTIDTTKTNIRTTLLTSNTTGNPEH  
TSQEETLHSTTSEGNLSPSQVYTTSEYLSQSPSSSNTSK"

ORIGIN

1 atcagcttct ccaatctgtc cggaactaca tcacaatcca ccaccatact agcttcaaca  
61 acaccaagtg ctgagtcaac cccacaatcc acaacagtca agatcaaaaa cacaacaaca  
121 acccaaatac aacctageaa acccaccaca aaacaacgcc aaaataaacc acaaaacaaa  
181 cccaacaatg attttcactt tgaagtgttc aattttgtac cctgcagcat atgcagcaac  
241 aatccaacct gctgggceat ctgcaagaga ataccaaca aaaaacctgg aaagaaaacc  
301 accaccaagc ccacaaaaaa accaaccatc aagacaacca aaaaagatcc caaacctcaa  
361 accacaaaac caaaggaagt actcaccacc aagcccacag aaaagccaac catcgacacc  
421 accaaaacaa acatcagaac tacactgetc acctccaaca ccacaggaaa tccagaacac  
481 acaagtcaag aggaaaccct cactcaacc acctccgaag gcaatctaag cccatcacia  
541 gtctatacaa catccgagta cctatcacia tctcatctt catccaacac atcaaatga

```

//
LOCUS   KY327977           600 bp  cRNA  linear  VRL 13-DEC-2016
DEFINITION Human respiratory syncytial virus A isolate TH-CU455/2012
           attachment glycoprotein gene, partial cds.
ACCESSION KY327977
VERSION   KY327977
KEYWORDS   .
SOURCE     Human respiratory syncytial virus A
ORGANISM   Human respiratory syncytial virus A
           Viruses; ssRNA viruses; ssRNA negative-strand viruses;
           Mononegavirales; Pneumoviridae; Orthopneumovirus.
REFERENCE  1 (bases 1 to 600)
AUTHORS   Thongpan,I., Mauleekoonphairoj,J., Vichiwattana,P., Korkong,S.,
           Vongpunsawad,S. and Poovorawan,Y.
TITLE     Molecular Characterization of Respiratory Syncytial Virus in
           Thailand, 2012-2015
JOURNAL   Unpublished
REFERENCE  2 (bases 1 to 600)
AUTHORS   Thongpan,I., Mauleekoonphairoj,J., Vichiwattana,P., Korkong,S.,
           Vongpunsawad,S. and Poovorawan,Y.
TITLE     Direct Submission
JOURNAL   Submitted (13-DEC-2016) Department of Pediatrics, Center of
           Excellence in Clinical Virology, Faculty of Medicine, Chulalongkorn
           University, Bangkok 10330, Thailand
COMMENT   ##Assembly-Data-START##
           Assembly Method      :: DNASTAR-Lasergene v. 6
           Sequencing Technology :: Sanger dideoxy sequencing
           ##Assembly-Data-END##
FEATURES             Location/Qualifiers
     source             1..600
                        /organism="Human respiratory syncytial virus A"
                        /mol_type="viral cRNA"
                        /isolate="TH-CU455/2012"
                        /host="Homo sapiens"
                        /db_xref="taxon:208893"
                        /country="Thailand"
                        /collection_date="01-Sep-2012"
                        /note="group: A"
     CDS                 <1..600
                        /note="G protein"
                        /codon_start=1
                        /product="attachment glycoprotein"
                        /protein_id="APY20318"
                        /translation="ISFSNLSGTTTSQSTTILASTTPSAESTPQSTTVKIKNTTTTQIQ
                        PSKPTTKQRQNKPNKPNNDFFHFVFNFPVPCISCSNNPTCWAICKRIPNKKPGKKT
                        TTKPTTKPTIKTTKKDPKPQTTKPKVLLTKPTEKPTIDTTKTNIRTTLLTSNTTGNPEH
                        TSQEETLHSTTSEGNLSPSQVYTTSEYLSQSPSSSNTSK"
ORIGIN
1 atcagcttct ccaatctgtc cggaactaca tcacaatcca ccaccatact agcttcaaca
61 acaccaagtg ctgagtcaac cccacaatcc acaacagtca agatcaaaaa cacaacaaca
121 acccaaatac aacctageaa acccaccaca aaacaacgcc aaaataaacc acaaaacaaa
181 cccaacaatg atttctactt tgaagtgttc aatthttgtac cctgcagcat atgcagcaac
241 aatccaacct gctgggcat ctgcaagaga ataccaaca aaaacctgg aaagaaaacc
301 accaccaagc ccacaaaaaa accaaccatc aagacaacca aaaagatcc caaacctcaa

```

361 accacaaaac caaaggaagt actcaccacc aagccacag aaaagccaac catcgacacc  
421 accaaaaaca acatcagaac tacactgtc acctccaaca ccacagaaa tccagaacac  
481 acaagtaag aggaaccct cactcaacc acctccgaag gcaatctaag cccatcaca  
541 gtctatacaa catccgagta cctatcaca ttccatctt catccaacac atcaaatga

//

LOCUS KY327978 600 bp cRNA linear VRL 13-DEC-2016

DEFINITION Human respiratory syncytial virus A isolate TH-CU458/2012

attachment glycoprotein gene, partial cds.

ACCESSION KY327978

VERSION KY327978

KEYWORDS .

SOURCE Human respiratory syncytial virus A

ORGANISM Human respiratory syncytial virus A

Viruses; ssRNA viruses; ssRNA negative-strand viruses;

Mononegavirales; Pneumoviridae; Orthopneumovirus.

REFERENCE 1 (bases 1 to 600)

AUTHORS Thongpan,I., Mauleekoonphairoj,J., Vichiwattana,P., Korkong,S.,

Vongpunsawad,S. and Poovorawan,Y.

TITLE Molecular Characterization of Respiratory Syncytial Virus in

Thailand, 2012-2015

JOURNAL Unpublished

REFERENCE 2 (bases 1 to 600)

AUTHORS Thongpan,I., Mauleekoonphairoj,J., Vichiwattana,P., Korkong,S.,

Vongpunsawad,S. and Poovorawan,Y.

TITLE Direct Submission

JOURNAL Submitted (13-DEC-2016) Department of Pediatrics, Center of

Excellence in Clinical Virology, Faculty of Medicine, Chulalongkorn

University, Bangkok 10330, Thailand

COMMENT ##Assembly-Data-START##

Assembly Method :: DNASTAR-Lasergene v. 6

Sequencing Technology :: Sanger dideoxy sequencing

##Assembly-Data-END##

FEATURES Location/Qualifiers

source 1..600

/organism="Human respiratory syncytial virus A"

/mol\_type="viral cRNA"

/isolate="TH-CU458/2012"

/host="Homo sapiens"

/db\_xref="taxon:208893"

/country="Thailand"

/collection\_date="01-Sep-2012"

/note="group: A"

CDS <1..600

/note="G protein"

/codon\_start=1

/product="attachment glycoprotein"

/protein\_id="APY20319"

/translation="ISFSNLSGTTTSQSTTILASTTPSAESTPQSTTVKIKNTTTTQIQ

PSKPTTKQRQNKPNKPNNDFFHFVFNFVPCISCSNPTCWAICKRIPNKKPGKTTT

KPTKKPTIKTTKKDPKPQTTKPKEVLTTKPTKPTIDTTKTNIRTTLLTSNTTGNPEH

TSQEETLHSTTSEGNLSPSQVYTTSEYLSQSPSSSNTSK"

ORIGIN

1 atcagcttct ccaatctgtc cggaactaca tcacaatcca ccaccatact agcttcaaca

61 acaccaagtg ctgagtcaac cccacaatcc acaacagtca agatcaaaaa cacaacaaca

121 acccaatac aacctagcaa acccaccaca aaacaacgcc aaaataaacc acaaaacaaa  
181 cccaacaatg attttactt tgaagtgtc aattttgtac cctgcagcat atgcagcaac  
241 aatccaacct gctgggcat ctgcaagaga ataccaaaca aaaacctgg aaagaaaacc  
301 accaccaagc ccacaaaaaa accaaccatc aagacaacca aaaagatcc caaacctcaa  
361 accacaaaac caaggaagt actcaccacc aagcccacag aaaagccaac catcgacacc  
421 accaaaacaa acatcagaac tacactgtc acctccaaca ccacaggaaa tccagaacac  
481 acaagtaag aggaaaccct cactcaacc acctccgaag gcaatctaag cccatcaaaa  
541 gtctatacaa catccgagta cctatcaaaa tctccatctt catccaacac atcaaatga

//

LOCUS KY327979 600 bp cRNA linear VRL 13-DEC-2016  
DEFINITION Human respiratory syncytial virus A isolate TH-CU/C2943/2012  
attachment glycoprotein gene, partial cds.

ACCESSION KY327979

VERSION KY327979

KEYWORDS .

SOURCE Human respiratory syncytial virus A

ORGANISM Human respiratory syncytial virus A

Viruses; ssRNA viruses; ssRNA negative-strand viruses;  
Mononegavirales; Pneumoviridae; Orthopneumovirus.

REFERENCE 1 (bases 1 to 600)

AUTHORS Thongpan,I., Mauleekoonphairoj,J., Vichiwattana,P., Korkong,S.,  
Vongpunsawad,S. and Poovorawan,Y.

TITLE Molecular Characterization of Respiratory Syncytial Virus in  
Thailand, 2012-2015

JOURNAL Unpublished

REFERENCE 2 (bases 1 to 600)

AUTHORS Thongpan,I., Mauleekoonphairoj,J., Vichiwattana,P., Korkong,S.,  
Vongpunsawad,S. and Poovorawan,Y.

TITLE Direct Submission

JOURNAL Submitted (13-DEC-2016) Department of Pediatrics, Center of  
Excellence in Clinical Virology, Faculty of Medicine, Chulalongkorn  
University, Bangkok 10330, Thailand

COMMENT ##Assembly-Data-START##

Assembly Method :: DNASTAR-Lasergene v. 6  
Sequencing Technology :: Sanger dideoxy sequencing  
##Assembly-Data-END##

FEATURES Location/Qualifiers

source 1..600

/organism="Human respiratory syncytial virus A"  
/mol\_type="viral cRNA"  
/isolate="TH-CU/C2943/2012"  
/host="Homo sapiens"  
/db\_xref="taxon:208893"  
/country="Thailand"  
/collection\_date="01-Jun-2012"  
/note="group: A"

CDS <1..600

/note="G protein"  
/codon\_start=1  
/product="attachment glycoprotein"  
/protein\_id="APY20320"  
/translation="ISFSNLSGTTTSQSTTILASTTPSAESTPQSTTVKIKNTTTTQIQ  
PSKPTTKQRQNKPNKPNNDFFHFVFNFPVPCISCSNNPTCWAICKRIPNKKPGKTTT  
KPTKKPTIKTTKDPKPKQTTPKPEVLTTKPTKPTIDTTKTNIRTTLLTSNTTGNPEH

TSQEETLHSTTSEGNLSPSQVYTTSEYLSQSPSSSNTSK"

ORIGIN

1 atcagcttct ccaatctgtc cggaactaca tcacaatcca ccaccatact agettcaaca  
61 acaccaagtg ctgagtcaac cccacaatcc acaacagtca agatcaaaaa cacaacaaca  
121 acccaaatac aacctagcaa acccaccaca aaacaacgcc aaaataaacc acaaaacaaa  
181 cccaacaatg attttcactt tgaagtgttc aattttgtac cctgcagcat atgcagcaac  
241 aatccaacct gctgggcat ctgcaagaga ataccaaaca aaaaacctgg aaagaaaacc  
301 accaccaagc ccacaaaaaa accaaccatc aaaacaacca aaaaagatcc caaacctcaa  
361 accacaaaaa caaggaagt actcaccacc aagcccacag aaaagccaac catcgacacc  
421 accaaaacaa acatcagaac tacactgtc acctccaaca ccacaggaaa tccagaacac  
481 acaagtaag aggaaacct cactcaacc acctccgaag gcaatctaag cccatcacia  
541 gtctatacaa catccgagta cctatcacia tctccatctt catccaacac atcaaatga

//

LOCUS KY327980 600 bp cRNA linear VRL 13-DEC-2016

DEFINITION Human respiratory syncytial virus A isolate TH-CU438/2012  
attachment glycoprotein gene, partial cds.

ACCESSION KY327980

VERSION KY327980

KEYWORDS .

SOURCE Human respiratory syncytial virus A

ORGANISM Human respiratory syncytial virus A

Viruses; ssRNA viruses; ssRNA negative-strand viruses;  
Mononegavirales; Pneumoviridae; Orthopneumovirus.

REFERENCE 1 (bases 1 to 600)

AUTHORS Thongpan,I., Mauleekoonphairoj,J., Vichiwattana,P., Korkong,S.,  
Vongpunsawad,S. and Poovorawan,Y.

TITLE Molecular Characterization of Respiratory Syncytial Virus in  
Thailand, 2012-2015

JOURNAL Unpublished

REFERENCE 2 (bases 1 to 600)

AUTHORS Thongpan,I., Mauleekoonphairoj,J., Vichiwattana,P., Korkong,S.,  
Vongpunsawad,S. and Poovorawan,Y.

TITLE Direct Submission

JOURNAL Submitted (13-DEC-2016) Department of Pediatrics, Center of  
Excellence in Clinical Virology, Faculty of Medicine, Chulalongkorn  
University, Bangkok 10330, Thailand

COMMENT ##Assembly-Data-START##

Assembly Method :: DNASTAR-Lasergene v. 6  
Sequencing Technology :: Sanger dideoxy sequencing  
##Assembly-Data-END##

FEATURES Location/Qualifiers

source 1..600  
/organism="Human respiratory syncytial virus A"  
/mol\_type="viral cRNA"  
/isolate="TH-CU438/2012"  
/host="Homo sapiens"  
/db\_xref="taxon:208893"  
/country="Thailand"  
/collection\_date="01-Sep-2012"  
/note="group: A"

CDS <1..600  
/note="G protein"  
/codon\_start=1  
/product="attachment glycoprotein"

/protein\_id="APY20321"  
/translation="ISFTNLSGTTSTKSTTILASTTPSAESTPQSTTVKIRNTTTTQIQ  
PSKPTTKQRQNKPNNDHFHFEVFNFVPCISCSNNPTCWAICKRIPNKKPGKKT  
KPTKKPTIKTTKKDPKPQTTKPKVLTTLKLEKPTIGTTKTNIRTTLLTSNTTGNPEH  
TSQEETLHSTTSEGNLSPSQVYTTSEYLSQSPSSSNTTK"

ORIGIN

1 atcagettca ccaatctgtc cggaactaca tcaaatcca ccaccatact agcttcaaca  
61 acaccaagtg ctgagtcaac cccacaatcc acaacagtca agatcagaaa cacaacaaca  
121 acccaataac aacctagcaa acccaccaca aaacaacgcc aaaataaacc acaaaacaaa  
181 cccaacaacg attttcactt tgaagtgttc aattttgtac cctgcagcat atgcagcaac  
241 aatccaacct gctgggcat ctgcaagaga ataccaca aaaaacctgg aaagaaaacc  
301 accaccaage ccacaaaaaa accaaccatc aagacaacca aaaaagatcc caaacctcaa  
361 accacaaaac caaaggaagt actcaccacc aagctcacag aaaagccaac catcggcacc  
421 accaaaacaa acatcagaac tacactgtc acctcaaca ccacaggaaa tccagaacac  
481 acaagtaag aggaaaccct cactcaacc acctcgaag gcaatctaag cccatcacia  
541 gtctatacaa catccgagta cctatcacia tctcatctt catccaacac aacaaaatga

//

LOCUS KY327981 600 bp cRNA linear VRL 13-DEC-2016

DEFINITION Human respiratory syncytial virus A isolate TH-CU463/2012  
attachment glycoprotein gene, partial cds.

ACCESSION KY327981

VERSION KY327981

KEYWORDS .

SOURCE Human respiratory syncytial virus A

ORGANISM Human respiratory syncytial virus A

Viruses; ssRNA viruses; ssRNA negative-strand viruses;  
Mononegavirales; Pneumoviridae; Orthopneumovirus.

REFERENCE 1 (bases 1 to 600)

AUTHORS Thongpan,I., Mauleekoonphairoj,J., Vichiwattana,P., Korkong,S.,  
Vongpunsawad,S. and Poovorawan,Y.

TITLE Molecular Characterization of Respiratory Syncytial Virus in  
Thailand, 2012-2015

JOURNAL Unpublished

REFERENCE 2 (bases 1 to 600)

AUTHORS Thongpan,I., Mauleekoonphairoj,J., Vichiwattana,P., Korkong,S.,  
Vongpunsawad,S. and Poovorawan,Y.

TITLE Direct Submission

JOURNAL Submitted (13-DEC-2016) Department of Pediatrics, Center of  
Excellence in Clinical Virology, Faculty of Medicine, Chulalongkorn  
University, Bangkok 10330, Thailand

COMMENT ##Assembly-Data-START##

Assembly Method :: DNASTAR-Lasergene v. 6  
Sequencing Technology :: Sanger dideoxy sequencing  
##Assembly-Data-END##

FEATURES Location/Qualifiers

source 1..600

/organism="Human respiratory syncytial virus A"  
/mol\_type="viral cRNA"  
/isolate="TH-CU463/2012"  
/host="Homo sapiens"  
/db\_xref="taxon:208893"  
/country="Thailand"  
/collection\_date="01-Sep-2012"  
/note="group: A"



CDS <1..600  
/note="G protein"  
/codon\_start=1  
/product="attachment glycoprotein"  
/protein\_id="APY20322"  
/translation="ISFTNLSGTTSKSTTILASTTPSAESTPQSTTVKIRNTTTTQIQ  
PSKPTTKQRQNKPNNDFFHFEVFNFVPCSICSNNPTCWAICKRIPNKKPGKKT  
KPTTKPTIKTTKKDPKPQTTPKPEVLTTKLTEKPTIGTTKTNIRTTLLTSNTTGNPEH  
TSQEETLHSTTSEGNLSPSQVYTTSEYLSQSPSSSNTTK"

ORIGIN

1 atcagettca ccaatctgtc cggaactaca tcaaatcca ccaccatact agcttcaaca  
61 acaccaagtg ctgagtcaac cccacaatcc acaacagtca agatcagaaa cacaacaaca  
121 acccaaatac aacctagcaa acccaccaca aaacaacgcc aaaataaacc acaaaacaaa  
181 cccaacaacg attttcactt tgaagtgttc aattttgtac cctgcagcat atgcagcaac  
241 aatccaacct gctgggcat ctgcaagaga ataccaaca aaaaacctgg aaagaaaacc  
301 accaccaagc ccacaaaaaa accaaccatc aagacaacca aaaaagatcc caaacctcaa  
361 accacaaaaa caaggaagt actcaccacc aagctcacag aaaagccaac catcggcacc  
421 accaaaaaca acatcagaac tacactgtc acctcaaca ccacaggaaa tccagaacac  
481 acaagtaag aggaaacct cactcaacc acctccgaag gcaatctaag cccatcacia  
541 gtctatacaa catccgagta cctatcacia ttccatctt catccaacac aacaaaatga

//

LOCUS KY327982 600 bp cRNA linear VRL 13-DEC-2016  
DEFINITION Human respiratory syncytial virus A isolate TH-CU/C3108/2012  
attachment glycoprotein gene, partial cds.

ACCESSION KY327982

VERSION KY327982

KEYWORDS .

SOURCE Human respiratory syncytial virus A

ORGANISM Human respiratory syncytial virus A

Viruses; ssRNA viruses; ssRNA negative-strand viruses;  
Mononegavirales; Pneumoviridae; Orthopneumovirus.

REFERENCE 1 (bases 1 to 600)

AUTHORS Thongpan,I., Mauleekoonphairoj,J., Vichiwattana,P., Korkong,S.,  
Vongpunsawad,S. and Poovorawan,Y.

TITLE Molecular Characterization of Respiratory Syncytial Virus in  
Thailand, 2012-2015

JOURNAL Unpublished

REFERENCE 2 (bases 1 to 600)

AUTHORS Thongpan,I., Mauleekoonphairoj,J., Vichiwattana,P., Korkong,S.,  
Vongpunsawad,S. and Poovorawan,Y.

TITLE Direct Submission

JOURNAL Submitted (13-DEC-2016) Department of Pediatrics, Center of  
Excellence in Clinical Virology, Faculty of Medicine, Chulalongkorn  
University, Bangkok 10330, Thailand

COMMENT ##Assembly-Data-START##

Assembly Method :: DNASTAR-Lasergene v. 6  
Sequencing Technology :: Sanger dideoxy sequencing  
##Assembly-Data-END##

FEATURES Location/Qualifiers

source 1..600  
/organism="Human respiratory syncytial virus A"  
/mol\_type="viral cRNA"  
/isolate="TH-CU/C3108/2012"  
/host="Homo sapiens"

/db\_xref="taxon:208893"  
/country="Thailand"  
/collection\_date="16-Aug-2012"  
/note="group: A"  
CDS <1..600  
/note="G protein"  
/codon\_start=1  
/product="attachment glycoprotein"  
/protein\_id="APY20323"  
/translation="ISFSNLSETTSQSTTILASTTPSAEPTPQSTTVKIKNTTTTQIQ  
PSKPTTKQRQNKPNKPNNDFFHFEVFNFVPCISCSNNPTCWAICKRIPNKKPGKKT  
KPTKKPTIKTTKKDPKPQTTKPKVLTTPKTEKPTIYTTKTNIRTTLLTSNTTGNPEH  
TSQEETLHSTTSEGNLSPSQVYTTSEYLSQSPSSSNTSK"

ORIGIN

1 atcagcttct ccaatctgtc cgaaactaca tcacaatcca ccaccatact agcttcaaca  
61 acaccaagtg ctgagccaac cccacaatcc acaacagtca agatcaaaaa cacaacaaca  
121 acccaataac aacctagcaa acccaccaca aaacaacgcc aaaacaacc acaaaacaaa  
181 cccaacaatg attttactt tgaagtgtc aattttgtac cctgtagcat atgcagcaac  
241 aatccaacct gctgggcat ctgcaagaga ataccaaca aaaacctgg aaagaaaacc  
301 accaccaage ccacaaaaa accaaccatc aagacaacca aaaagatcc caaacctcaa  
361 accacaaaac caaggaagt actcaccacc aagcccacag aaaagccaac catctacacc  
421 accaaaacaa acatcagaac tacactgtc acctcaaca ccacaggaaa tccagaacac  
481 acaagtaag aggaaacct cactcaacc acctccgaag gcaatctaag cccatcaaa  
541 gtctatacaa catccgagta cctatcaaa tctccatctt catccaacac atcaaatga

//

LOCUS KY327983 306 bp cRNA linear VRL 13-DEC-2016

DEFINITION Human respiratory syncytial virus A isolate TH-CU346/2012  
attachment glycoprotein gene, partial cds.

ACCESSION KY327983

VERSION KY327983

KEYWORDS .

SOURCE Human respiratory syncytial virus A

ORGANISM Human respiratory syncytial virus A

Viruses; ssRNA viruses; ssRNA negative-strand viruses;  
Mononegavirales; Pneumoviridae; Orthopneumovirus.

REFERENCE 1 (bases 1 to 306)

AUTHORS Thongpan,I., Mauleekoonphairoj,J., Vichiwattana,P., Korkong,S.,  
Vongpunsawad,S. and Poovorawan,Y.

TITLE Molecular Characterization of Respiratory Syncytial Virus in  
Thailand, 2012-2015

JOURNAL Unpublished

REFERENCE 2 (bases 1 to 306)

AUTHORS Thongpan,I., Mauleekoonphairoj,J., Vichiwattana,P., Korkong,S.,  
Vongpunsawad,S. and Poovorawan,Y.

TITLE Direct Submission

JOURNAL Submitted (13-DEC-2016) Department of Pediatrics, Center of  
Excellence in Clinical Virology, Faculty of Medicine, Chulalongkorn  
University, Bangkok 10330, Thailand

COMMENT ##Assembly-Data-START##

Assembly Method :: DNASTAR-Lasergene v. 6  
Sequencing Technology :: Sanger dideoxy sequencing  
##Assembly-Data-END##

FEATURES Location/Qualifiers

source 1..306

/organism="Human respiratory syncytial virus A"  
/mol\_type="viral cRNA"  
/isolate="TH-CU346/2012"  
/host="Homo sapiens"  
/db\_xref="taxon:208893"  
/country="Thailand"  
/collection\_date="01-Apr-2012"  
/note="group: A"  
CDS <1..306  
/note="G protein"  
/codon\_start=1  
/product="attachment glycoprotein"  
/protein\_id="APY20324"  
/translation="KTTTKPTKKPTLKTTKKDKPKPQTTPKPEVLTTKPTEKPTIDTTK  
TNIRTTLLTSNTTGNPEHTSQEETLHSTTSEGNLSPSQVYTTSEYLSQSPSSSNTSK"

ORIGIN

1 aaaaccacca ccaagccac aaaaaagcca accctcaaga caaccaaaaa agatccaaa  
61 cctcaaacca caaaacaaaa ggaagtactc accaccaagc ccacagaaaa gccaacatc  
121 gacaccacca aaacaacat cagaactaca ctgctcacct ccaacaccac aggaaatcca  
181 gaacacacaa gtcaagagga aacctccac tcaaccacct ccgaaggcaa tctaagccca  
241 tcacaagtct atacaacatc cgagtaccta tcacaatctc catctctc atc caacacatca  
301 aaatga

//

LOCUS KY327984 393 bp cRNA linear VRL 13-DEC-2016

DEFINITION Human respiratory syncytial virus A isolate TH-CU363/2012  
attachment glycoprotein gene, partial cds.

ACCESSION KY327984

VERSION KY327984

KEYWORDS .

SOURCE Human respiratory syncytial virus A

ORGANISM Human respiratory syncytial virus A

Viruses; ssRNA viruses; ssRNA negative-strand viruses;  
Mononegavirales; Pneumoviridae; Orthopneumovirus.

REFERENCE 1 (bases 1 to 393)

AUTHORS Thongpan,I., Mauleekoonphairoj,J., Vichiwattana,P., Korkong,S.,  
Vongpunsawad,S. and Poovorawan,Y.

TITLE Molecular Characterization of Respiratory Syncytial Virus in  
Thailand, 2012-2015

JOURNAL Unpublished

REFERENCE 2 (bases 1 to 393)

AUTHORS Thongpan,I., Mauleekoonphairoj,J., Vichiwattana,P., Korkong,S.,  
Vongpunsawad,S. and Poovorawan,Y.

TITLE Direct Submission

JOURNAL Submitted (13-DEC-2016) Department of Pediatrics, Center of  
Excellence in Clinical Virology, Faculty of Medicine, Chulalongkorn  
University, Bangkok 10330, Thailand

COMMENT ##Assembly-Data-START##

Assembly Method :: DNASTAR-Lasergene v. 6  
Sequencing Technology :: Sanger dideoxy sequencing  
##Assembly-Data-END##

FEATURES Location/Qualifiers

source 1..393

/organism="Human respiratory syncytial virus A"  
/mol\_type="viral cRNA"

/isolate="TH-CU363/2012"  
/host="Homo sapiens"  
/db\_xref="taxon:208893"  
/country="Thailand"  
/collection\_date="01-Jun-2012"  
/note="group: A"  
CDS <1..393  
/note="G protein"  
/codon\_start=1  
/product="attachment glycoprotein"  
/protein\_id="APY20325"  
/translation="FNFVPCSICSNNPCWAICKRIPNKKPGKKTITTKPTKKPTIKTT  
KKDKPKQTTKPKVELTTKPKTEKPTIDTTKTNIRTTLLTSYTTGNPEHTSQEETLHSTT  
SEGNLSPSQVYTTSEYLSQSPSSSYTTK"

ORIGIN

1 ttaactttg tacctgcag catatgcagc aacaatccaa cctgctgggc tatctgcaag  
61 agaataccaa acaaaaaacc tggaagaaa accaccacca agcccacaaa aaaaccaacc  
121 atcaagacaa ccaaaaaaga tccaaacct caaacacaa aaccaaagga ggtactcacc  
181 accaagecca cagaaaagcc aaccatcgac accaccaaaa caacatcag aactacactg  
241 ctacactcct aactacagg aatccagaa cacacaagcc aagaggaaac cctccactca  
301 accactccg aaggcaatct aagccatca caagtctata caacatccga gtacctatca  
361 caatcctcat ctctaccta cacaacaaaa tga

//

LOCUS KY327985 660 bp cRNA linear VRL 13-DEC-2016

DEFINITION Human respiratory syncytial virus A isolate TH-CU432/2012  
attachment glycoprotein gene, partial cds.

ACCESSION KY327985

VERSION KY327985

KEYWORDS .

SOURCE Human respiratory syncytial virus A

ORGANISM Human respiratory syncytial virus A

Viruses; ssRNA viruses; ssRNA negative-strand viruses;  
Mononegavirales; Pneumoviridae; Orthopneumovirus.

REFERENCE 1 (bases 1 to 660)

AUTHORS Thongpan,I., Mauleekoonphairoj,J., Vichiwattana,P., Korkong,S.,  
Vongpunsawad,S. and Poovorawan,Y.

TITLE Molecular Characterization of Respiratory Syncytial Virus in  
Thailand, 2012-2015

JOURNAL Unpublished

REFERENCE 2 (bases 1 to 660)

AUTHORS Thongpan,I., Mauleekoonphairoj,J., Vichiwattana,P., Korkong,S.,  
Vongpunsawad,S. and Poovorawan,Y.

TITLE Direct Submission

JOURNAL Submitted (13-DEC-2016) Department of Pediatrics, Center of  
Excellence in Clinical Virology, Faculty of Medicine, Chulalongkorn  
University, Bangkok 10330, Thailand

COMMENT ##Assembly-Data-START##

Assembly Method :: DNASTAR-Lasergene v. 6  
Sequencing Technology :: Sanger dideoxy sequencing  
##Assembly-Data-END##

FEATURES Location/Qualifiers

source 1..660

/organism="Human respiratory syncytial virus A"  
/mol\_type="viral cRNA"

/isolate="TH-CU432/2012"  
/host="Homo sapiens"  
/db\_xref="taxon:208893"  
/country="Thailand"  
/collection\_date="01-Aug-2012"  
/note="group: A"

CDS

<1..660  
/note="G protein"  
/codon\_start=1  
/product="attachment glycoprotein"  
/protein\_id="APY20326"  
/translation="ATSQIKNTTPTYLTQNPQLGISFSNLSGTTSQSTIILASTTPSA  
ESTPQSTTVKIKNTTTTQIQPSKPTTKQRQNKPKPNNDFHFEVFNFVPCSICSNNP  
TCWAICKRIPNKKPGKKTTKPTKKPTIKTTKKDKPKPQTTKPKVLTTKPTEQPTINT  
TKTNIRTTLLTSNTTGDPEHTSQEETLHSTTFEGNPSPSQVHTTPEYPSQSPSSNTT  
K"

ORIGIN

1 gcaacaagcc agatcaagaa cacaaccca acatacctca cccagaatcc ccagcttgga  
61 atcagcttct ccaatctgtc cggaactaca tcacaatcca ccatcact agcttcaaca  
121 acaccaagtg ctgagtaaac cccacaatcc acaacagtca agatcaaaaa cacaacaaca  
181 accaaatac aacctagcaa accaccaca aaacaacgcc aaaataaacc acaaaacaaa  
241 cccaacaatg atttctact cgaagtgtc aattttgtac cctgcagcat atgcagcaac  
301 aatccaacct gctgggcat ctgcaagaga ataccaaca aaaaacctgg aaagaaaacc  
361 accaccaagc ccacaaaaa accaaccatc aagacaacca aaaaagatcc caaacctcaa  
421 accacaaaac caaggaagt actcaccacc aagcccacag aacagccaac catcaacacc  
481 accaaaacaa acatcagaac cacactgctc acctccaaca ccacaggaga tccagaacac  
541 acaagtcaag aggaaactct ccatcaacc accttgaag gcaatccaag cccatcacia  
601 gtccacacia caccgagta cccatcacia tctccatct catctaacac acaaaaatga

//

LOCUS KY327986 651 bp cRNA linear VRL 12-DEC-2016  
DEFINITION Human respiratory syncytial virus A isolate TH-CU/B10625/2014  
attachment glycoprotein gene, partial cds.

ACCESSION KY327986

VERSION KY327986

KEYWORDS .

SOURCE Human respiratory syncytial virus A

ORGANISM Human respiratory syncytial virus A

Viruses; ssRNA viruses; ssRNA negative-strand viruses;  
Mononegavirales; Pneumoviridae; Orthopneumovirus.

REFERENCE 1 (bases 1 to 651)

AUTHORS Thongpan,I., Mauleekoonphairoj,J., Vichiwattana,P., Korkong,S.,  
Vongpunsawad,S. and Poovorawan,Y.

TITLE Molecular Characterization of Respiratory Syncytial Virus in  
Thailand, 2012-2015

JOURNAL Unpublished

REFERENCE 2 (bases 1 to 651)

AUTHORS Thongpan,I., Mauleekoonphairoj,J., Vichiwattana,P., Korkong,S.,  
Vongpunsawad,S. and Poovorawan,Y.

TITLE Direct Submission

JOURNAL Submitted (13-DEC-2016) Department of Pediatrics, Center of  
Excellence in Clinical Virology, Faculty of Medicine, Chulalongkorn  
University, Bangkok 10330, Thailand

COMMENT ##Assembly-Data-START##

Assembly Method :: DNASTAR-Lasergene v. 6

Sequencing Technology :: Sanger dideoxy sequencing

##Assembly-Data-END##

FEATURES Location/Qualifiers

source 1..651  
/organism="Human respiratory syncytial virus A"  
/mol\_type="viral cRNA"  
/isolate="TH-CU/B10625/2014"  
/host="Homo sapiens"  
/db\_xref="taxon:208893"  
/country="Thailand"  
/collection\_date="09-Aug-2014"  
/note="group: A"

CDS <1..651  
/note="G protein"  
/codon\_start=1  
/product="attachment glycoprotein"  
/protein\_id="APY20327"  
/translation="GTTSQSTTILASTTPSAESTPQSTTVKIKNTTTTQILPSKTTTK  
QHQNKPQNKPNDFHFEVFNFVPCISCSNNPTCWAICKRIPNKKPGKTTTKPTKKPT  
LKTTKKDPKPQTTKPKVLTTKPTGKPTINTTKTNIRTTLLTSNTKGNPEHTSQEETL  
HSTTSEGYLSPSQVYTTSGQEETLHSTTSEGYLSPSQVYTTSEYLSQSLSSSNATK"

ORIGIN

1 ggaactacat cacaatccac caccatacta gttcaacaa caccaagtgc tgagtaacc  
61 ccacaatcca caacagtea gatcaaaaac acaacaacaa cccaaatatt acctagcaaa  
121 accaccacaa aacaacacca aaataaacca caaacaacac ccaacaatga tttcacttt  
181 gaagtgtca atttgtacc ctgcagcata tgcagcaaca atccaacctg ctgggccatc  
241 tgcaagagaa taccaacaaa aaaacctgga aagaaaacca ccaccaagcc cacaaaaaaa  
301 ccaacctca aaacaaccaa aaaagatecc aaacctcaaa ccacaaaacc aaaggaagta  
361 ctactacca agcctacagg aaagccaacc atcaacacca ctaaaacaaa catcagaact  
421 aactgctca cctcaacac caaaggaaat ccagaacaca caagtaaga ggaaaccctc  
481 cactcaacca cctcgaagg ctatctaagc ccatcacaag tetatacaac atccggtaaa  
541 gaggaacc tccactcaac cacctcgaag gggtatctaa gccatcaca agtctataca  
601 acatccgagt acctatcaca atctctatct tcatccaacg caacaaaatg a

//

LOCUS KY327987 651 bp cRNA linear VRL 12-DEC-2016  
DEFINITION Human respiratory syncytial virus A isolate TH-CU/C3083/2012  
attachment glycoprotein gene, partial cds.

ACCESSION KY327987

VERSION KY327987

KEYWORDS .

SOURCE Human respiratory syncytial virus A

ORGANISM Human respiratory syncytial virus A  
Viruses; ssRNA viruses; ssRNA negative-strand viruses;  
Mononegavirales; Pneumoviridae; Orthopneumovirus.

REFERENCE 1 (bases 1 to 651)

AUTHORS Thongpan,I., Mauleekoonphairoj,J., Vichiwattana,P., Korkong,S.,  
Vongpunsawad,S. and Poovorawan,Y.

TITLE Molecular Characterization of Respiratory Syncytial Virus in  
Thailand, 2012-2015

JOURNAL Unpublished

REFERENCE 2 (bases 1 to 651)

AUTHORS Thongpan,I., Mauleekoonphairoj,J., Vichiwattana,P., Korkong,S.,  
Vongpunsawad,S. and Poovorawan,Y.

TITLE Direct Submission

JOURNAL Submitted (13-DEC-2016) Department of Pediatrics, Center of Excellence in Clinical Virology, Faculty of Medicine, Chulalongkorn University, Bangkok 10330, Thailand

COMMENT ##Assembly-Data-START##

Assembly Method :: DNASTAR-Lasergene v. 6  
Sequencing Technology :: Sanger dideoxy sequencing  
##Assembly-Data-END##

FEATURES Location/Qualifiers

source 1..651  
/organism="Human respiratory syncytial virus A"  
/mol\_type="viral cRNA"  
/isolate="TH-CU/C3083/2012"  
/host="Homo sapiens"  
/db\_xref="taxon:208893"  
/country="Thailand"  
/collection\_date="16-Aug-2012"  
/note="group: A"

CDS <1..651  
/note="G protein"  
/codon\_start=1  
/product="attachment glycoprotein"  
/protein\_id="APY20328"  
/translation="GTTSQSTTILASTTPSAESTPQSTTVKIKNTTTTQILPSKPTTK  
QRQNKPNKPNDFHFEVFNFPVPCISCSNNPTCWAICKRIPNKKPGKKT TTKPTKKPT  
LKTTKKDPKPQTTPKPEVLTKPTGKPTINTTKTNIRTTLLTSNTKGNPEHTSQEETL  
HSTTSEGYLSPSQVYTTSGQEETLHSTTSEGYLSPSQVYTTSEYLSQSLSSSNTTK"

ORIGIN

1 ggaactacat cacaatccac caccatacta gcttcaacaa caccaagtgc tgagtcaacc  
61 ccacaatcca caacagtcaa gatcaaaaac acaacaacaa cccaaatatt acctagcaaa  
121 cccaccacaa aacaacgcca aaataaacca caaaacaaac ccaacaatga tttcacttt  
181 gaagtggtca atttgtacc ctgcagcata tgcagcaaca atccaacctg ctgggccatc  
241 tgcaagagaa taccaaacaa aaaacctgga aagaaaacca ccaccaagcc cacaaaaaaa  
301 ccaacctca agacaaccaa aaaagatccc aaacctcaaa ccacaaaacc aaaggaagta  
361 ctactacca agcctacagg aaagccaacc atcaacacca ctaaaacaaa catcagaact  
421 aactgetca cctccaacac caaaggaaat ccagaacaca caagtcaaga ggaaaccctc  
481 cactcaacca cctccgaagg ctatctaagc ccatacacaag tctatacaac atctggtcaa  
541 gaggaacc tccactcaac cacctcgaa ggctatctaa gccatcaca agtctataca  
601 acatccgagt acctatcaca atctctatct tcatccaaca caacaaatg a

//

LOCUS KY327988 651 bp cRNA linear VRL 12-DEC-2016  
DEFINITION Human respiratory syncytial virus A isolate TH-CU/C3142/2012  
attachment glycoprotein gene, partial cds.

ACCESSION KY327988

VERSION KY327988

KEYWORDS .

SOURCE Human respiratory syncytial virus A

ORGANISM Human respiratory syncytial virus A  
Viruses; ssRNA viruses; ssRNA negative-strand viruses;  
Mononegavirales; Pneumoviridae; Orthopneumovirus.

REFERENCE 1 (bases 1 to 651)

AUTHORS Thongpan,I., Mauleekoonphairoj,J., Vichiwattana,P., Korkong,S.,  
Vongpunsawad,S. and Poovorawan,Y.

TITLE Molecular Characterization of Respiratory Syncytial Virus in  
Thailand, 2012-2015

JOURNAL Unpublished  
REFERENCE 2 (bases 1 to 651)  
AUTHORS Thongpan,I., Mauleekoonphairoj,J., Vichiwattana,P., Korkong,S.,  
Vongpunsawad,S. and Poovorawan,Y.  
TITLE Direct Submission  
JOURNAL Submitted (13-DEC-2016) Department of Pediatrics, Center of  
Excellence in Clinical Virology, Faculty of Medicine, Chulalongkorn  
University, Bangkok 10330, Thailand  
COMMENT ##Assembly-Data-START##  
Assembly Method :: DNASTAR-Lasergene v. 6  
Sequencing Technology :: Sanger dideoxy sequencing  
##Assembly-Data-END##  
FEATURES Location/Qualifiers  
source 1..651  
/organism="Human respiratory syncytial virus A"  
/mol\_type="viral cRNA"  
/isolate="TH-CU/C3142/2012"  
/host="Homo sapiens"  
/db\_xref="taxon:208893"  
/country="Thailand"  
/collection\_date="22-Aug-2012"  
/note="group: A"  
CDS <1..651  
/note="G protein"  
/codon\_start=1  
/product="attachment glycoprotein"  
/protein\_id="APY20329"  
/translation="GTTSQSTTILASTTPSAESTPQSTTVKIKNTTTTQILPSKPTTK  
QRQNKPKQNKPNDFHFEVFNFPVPCISCSNNPTCWAICKRIPNKKPGKKTTKPTKKPT  
LKTTKKDPKPQTTPKPEVLTKPTGKPTINTTKTNIRTTLLTSNTKGNPEHTSQEETL  
HSTTSEGYLSPSQVYTTSGQEETLHSTTSEGYLSPSQVYTTSEYLSQSLSSSNTTK"  
ORIGIN  
1 ggaactacat cacaatccac caccatacta gcttcaacaa caccaagtgc tgagtcaacc  
61 ccacaatcca caacagtcaa gatcaaaaac acaacaacaa cccaatatt acctagcaaa  
121 cccaccacaa aacaacgcca aaataaacca caaaacaaac ccaacaatga ttttacttt  
181 gaagtgttca atttgtacc ctgcagcata tgcagcaaca atccaacctg ctgggccatc  
241 tgcaagagaa taccaacaa aaaacctgga aagaaaacca ccaccaagcc cacaaaaaaa  
301 ccaacctca agacaacaa aaaagatecc aaacctcaa ccacaaaacc aaaggaagta  
361 ctactacca agcctacagg aaagccaacc atcaacacca ctaaaacaaa catcagaact  
421 aactgtctca cctccaacac caaaggaaat ccagaacaca caagtcaaga ggaaacctc  
481 cactcaacca cctccgaagg ctatctaagc ccatcacaag tctatacaac atccggtaa  
541 gaggaaacc tcaactcaac cacctcgaa ggctatctaa gccatcaca agtctataca  
601 acatccgagt acctatcaca atctctatct tcatccaaca caacaaaatg a  
//  
LOCUS KY327989 651 bp cRNA linear VRL 12-DEC-2016  
DEFINITION Human respiratory syncytial virus A isolate TH-CU/C3304/2012  
attachment glycoprotein gene, partial cds.  
ACCESSION KY327989  
VERSION KY327989  
KEYWORDS .  
SOURCE Human respiratory syncytial virus A  
ORGANISM Human respiratory syncytial virus A  
Viruses; ssRNA viruses; ssRNA negative-strand viruses;  
Mononegavirales; Pneumoviridae; Orthopneumovirus.



REFERENCE 1 (bases 1 to 651)

AUTHORS Thongpan,I., Mauleekoonphairoj,J., Vichiwattana,P., Korkong,S.,  
Vongpunsawad,S. and Poovorawan,Y.

TITLE Molecular Characterization of Respiratory Syncytial Virus in  
Thailand, 2012-2015

JOURNAL Unpublished

REFERENCE 2 (bases 1 to 651)

AUTHORS Thongpan,I., Mauleekoonphairoj,J., Vichiwattana,P., Korkong,S.,  
Vongpunsawad,S. and Poovorawan,Y.

TITLE Direct Submission

JOURNAL Submitted (13-DEC-2016) Department of Pediatrics, Center of  
Excellence in Clinical Virology, Faculty of Medicine, Chulalongkorn  
University, Bangkok 10330, Thailand

COMMENT ##Assembly-Data-START##

Assembly Method :: DNASTAR-Lasergene v. 6  
Sequencing Technology :: Sanger dideoxy sequencing  
##Assembly-Data-END##

FEATURES Location/Qualifiers

source 1..651  
/organism="Human respiratory syncytial virus A"  
/mol\_type="viral cRNA"  
/isolate="TH-CU/C3304/2012"  
/host="Homo sapiens"  
/db\_xref="taxon:208893"  
/country="Thailand"  
/collection\_date="25-Oct-2012"  
/note="group: A"

CDS <1..651  
/note="G protein"  
/codon\_start=1  
/product="attachment glycoprotein"  
/protein\_id="APY20330"  
/translation="GTTSQSTTILASTTPSAESTPQSTTVKIKNTTTTQILPSKPTTK  
QRQNKPKQNKPNDFHFEVFNFPVPCISCSNNPTCWAICKRIPNKKPGKKTTKPTKKPT  
LKTTKKDPKPQTTKPKVLTTKPTGKPTINTTKTNI RTLLTSNTKGNPEHTSQEETL  
HSTTSEGYLSPSQVYTTSGQEETLHSTTSEGYLSPSQVYTTSEYLSQSLSSSNTTK"

ORIGIN

1 ggaactacat cacaatccac caccatacta gttcaacaa caccaagtgc tgagtcaacc  
61 ccacaatcca caacagtcaa gatcaaaaac acaacaacaa cccaaatatt acctagcaaa  
121 cccaccacaa aacaacgcca aaataaacca caaaacaaac ccaacaatga ttttcacttt  
181 gaagtgttca atttgtacc ctgcagcata tgcagcaaca atccaacctg ctgggcccac  
241 tgcaagagaa taccaacaaa aaaacctgga aagaaaacca ccaccaagcc cacaaaaaaa  
301 ccaacctca agacaacaaa aaaagatccc aaacctcaaa ccacaaaacc aaaggaagta  
361 ctactacca agcctacagg aaagccaacc atcaacacca ctaaaacaaa catcagaact  
421 aactgetca cctccaacac caaaggaat ccagaacaca caagtcaaga ggaaaccctc  
481 cactcaacca cctccgaagg ctatctaagc ccatcacaag tctatacaac atccgggtaa  
541 gaggaacecc tcaactcaac cacctcggaa ggctatctaa gcccatcaca agtctataca  
601 acatccgagt acctatcaca atctctatct tcattcaaca caacaaaatg a

//

LOCUS KY327990 651 bp cRNA linear VRL 12-DEC-2016

DEFINITION Human respiratory syncytial virus A isolate TH-CU/C2860/2012  
attachment glycoprotein gene, partial cds.

ACCESSION KY327990

VERSION KY327990

KEYWORDS

SOURCE Human respiratory syncytial virus A

ORGANISM Human respiratory syncytial virus A

Viruses; ssRNA viruses; ssRNA negative-strand viruses; Mononegavirales; Pneumoviridae; Orthopneumovirus.

REFERENCE 1 (bases 1 to 651)

AUTHORS Thongpan,I., Mauleekoonphairoj,J., Vichiwattana,P., Korkong,S., Vongpunsawad,S. and Poovorawan,Y.

TITLE Molecular Characterization of Respiratory Syncytial Virus in Thailand, 2012-2015

JOURNAL Unpublished

REFERENCE 2 (bases 1 to 651)

AUTHORS Thongpan,I., Mauleekoonphairoj,J., Vichiwattana,P., Korkong,S., Vongpunsawad,S. and Poovorawan,Y.

TITLE Direct Submission

JOURNAL Submitted (13-DEC-2016) Department of Pediatrics, Center of Excellence in Clinical Virology, Faculty of Medicine, Chulalongkorn University, Bangkok 10330, Thailand

COMMENT ##Assembly-Data-START##

Assembly Method :: DNASTAR-Lasergene v. 6  
Sequencing Technology :: Sanger dideoxy sequencing  
##Assembly-Data-END##

FEATURES Location/Qualifiers

source 1..651  
/organism="Human respiratory syncytial virus A"  
/mol\_type="viral cRNA"  
/isolate="TH-CU/C2860/2012"  
/host="Homo sapiens"  
/db\_xref="taxon:208893"  
/country="Thailand"  
/collection\_date="25-May-2012"  
/note="group: A"

CDS <1..651  
/note="G protein"  
/codon\_start=1  
/product="attachment glycoprotein"  
/protein\_id="APY20331"  
/translation="GTTSQSTTILASTTPSAESTPQSTTVKIKNTTTTQILPSKPTTK  
QRQNKPNKPNDFHFEVFNFPVPCISCSNNPTCWAICKRIPNKKPGKKTTKPTKKPT  
LKTTKKDPKPKQTTKPKVLTTKPTGKPTINTTKTNI RTLLTSNTKGNPEHTSQEETL  
HSTTSEGYLSPSQVYTTSGQEETLHSTTSEGYLSPSQVYTTSEYLSQSLSSSNTTK"

ORIGIN

1 ggaactacat cacaatccac caccatacta gttcaacaa caccaagtgc tgagtaacc  
61 ccacaatcca caacagteaa gatcaaaaac acaacaacaa cccaaatatt acctagcaaa  
121 cccaccacaa aacaacgcca aaataaacca caaaacaac ccaacaatga tttcacttt  
181 gaagtgtca atttgtacc ctgcagcata tgcagcaaca atccaacctg ctgggccatc  
241 tgcaagagaa taccaaacaa aaaacctgga aagaaaacca ccaccaagcc cacaaaaaaa  
301 ccaacctca agacaaccaa aaaagatecc aaacctcaaa ccacaaaacc aaaggaagta  
361 ctactacca agcctacagg aaagccaacc atcaacacca ctaaacaacaa catcagaact  
421 aactgctca ctccaacac caaaggaaat ccagaacaca caagtcaaga ggaaaccctc  
481 cactcaacca cctcgaagg ctatctaagc ccatacaag tetatacaac atccggtaa  
541 gaggaacc tccaactaac cacctcgaa ggctatctaa gccatcaca agtctataca  
601 acatcagat acctatcaca atctctatct teatccaaca caacaaaatg a

//

LOCUS KY327991 651 bp cRNA linear VRL 12-DEC-2016  
DEFINITION Human respiratory syncytial virus A isolate TH-CU/C2993/2012  
attachment glycoprotein gene, partial cds.

ACCESSION KY327991

VERSION KY327991

KEYWORDS .

SOURCE Human respiratory syncytial virus A

ORGANISM Human respiratory syncytial virus A

Viruses; ssRNA viruses; ssRNA negative-strand viruses;  
Mononegavirales; Pneumoviridae; Orthopneumovirus.

REFERENCE 1 (bases 1 to 651)

AUTHORS Thongpan,I., Mauleekoonphairoj,J., Vichiwattana,P., Korkong,S.,  
Vongpunsawad,S. and Poovorawan,Y.

TITLE Molecular Characterization of Respiratory Syncytial Virus in  
Thailand, 2012-2015

JOURNAL Unpublished

REFERENCE 2 (bases 1 to 651)

AUTHORS Thongpan,I., Mauleekoonphairoj,J., Vichiwattana,P., Korkong,S.,  
Vongpunsawad,S. and Poovorawan,Y.

TITLE Direct Submission

JOURNAL Submitted (13-DEC-2016) Department of Pediatrics, Center of  
Excellence in Clinical Virology, Faculty of Medicine, Chulalongkorn  
University, Bangkok 10330, Thailand

COMMENT ##Assembly-Data-START##

Assembly Method :: DNASTAR-Lasergene v. 6  
Sequencing Technology :: Sanger dideoxy sequencing  
##Assembly-Data-END##

FEATURES Location/Qualifiers

source 1..651  
/organism="Human respiratory syncytial virus A"  
/mol\_type="viral cRNA"  
/isolate="TH-CU/C2993/2012"  
/host="Homo sapiens"  
/db\_xref="taxon:208893"  
/country="Thailand"  
/collection\_date="10-Jul-2012"  
/note="group: A"

CDS <1..651  
/note="G protein"  
/codon\_start=1  
/product="attachment glycoprotein"  
/protein\_id="APY20332"  
/translation="GTTSQSTTILASTTPSAESTPQSTTVKIKNTTTTQILPSKPTTK  
QRQNKPNKPNDFHFEVFNFPVPCISCSNNPTCWAICKRIPNKKPGKTTTKPTKKPT  
LKTTKKDPKPQTTKPKVLTTKPTGKPTINTTKTNI RTLLTSNTKGNPEHTSQEETL  
HSTTSEGYLSPSQVYTTSGQEETLHSTTSEGYLSPSQVYTTSEYLSQSLSSSNTTK"

ORIGIN

1 ggaactacat cacaatccac caccatacta gttcaacaa caccaagtgc tgagtcaacc  
61 cacaatcca caacagtcaa gatcaaaaac acaacaacaa ccaaatatt acctagcaaa  
121 cccaccacaa aacaacgcca aataaacca caaaacaac ccaacaatga tttcacttt  
181 gaagtgttca atttgtacc ctgcagcata tgcagcaaca atccaacctg ctgggccatc  
241 tgcaagagaa taccaacaa aaaacctgga aagaaaacca ccaccaagcc cacaaaaaaa  
301 ccaacctca agacaacaa aaaagatccc aaacctcaaa ccacaaaacc aaaggaagta  
361 ctactacca agcctacagg aaagccaacc atcaacacca ctaaaacaaa catcagaact

421 acactgetca cctccaacac caaaggaaat ccagaacaca caagtcaaga ggaaaccctc  
481 cactcaacca cctccgaagg ctatctaagc ccatacacaag tctatacaac atccgggtcaa  
541 gaggaaacc tccactcaac cacctcggaa ggctatctaa gccatcaca agtctataca  
601 acatccgagt acctatcaca atctctatct tcatacaaca caacaaaatg a

//

LOCUS KY327992 651 bp cRNA linear VRL 12-DEC-2016

DEFINITION Human respiratory syncytial virus A isolate TH-CU/C3130/2012  
attachment glycoprotein gene, partial cds.

ACCESSION KY327992

VERSION KY327992

KEYWORDS .

SOURCE Human respiratory syncytial virus A

ORGANISM Human respiratory syncytial virus A

Viruses; ssRNA viruses; ssRNA negative-strand viruses;

Mononegavirales; Pneumoviridae; Orthopneumovirus.

REFERENCE 1 (bases 1 to 651)

AUTHORS Thongpan,I., Mauleekoonphairoj,J., Vichiwattana,P., Korkong,S.,  
Vongpunsawad,S. and Poovorawan,Y.

TITLE Molecular Characterization of Respiratory Syncytial Virus in  
Thailand, 2012-2015

JOURNAL Unpublished

REFERENCE 2 (bases 1 to 651)

AUTHORS Thongpan,I., Mauleekoonphairoj,J., Vichiwattana,P., Korkong,S.,  
Vongpunsawad,S. and Poovorawan,Y.

TITLE Direct Submission

JOURNAL Submitted (13-DEC-2016) Department of Pediatrics, Center of  
Excellence in Clinical Virology, Faculty of Medicine, Chulalongkorn  
University, Bangkok 10330, Thailand

COMMENT ##Assembly-Data-START##

Assembly Method :: DNASTAR-Lasergene v. 6

Sequencing Technology :: Sanger dideoxy sequencing

##Assembly-Data-END##

FEATURES Location/Qualifiers

source 1..651

/organism="Human respiratory syncytial virus A"

/mol\_type="viral cRNA"

/isolate="TH-CU/C3130/2012"

/host="Homo sapiens"

/db\_xref="taxon:208893"

/country="Thailand"

/collection\_date="22-Aug-2012"

/note="group: A"

CDS <1..651

/note="G protein"

/codon\_start=1

/product="attachment glycoprotein"

/protein\_id="APY20333"

/translation="GTTSQSTTILASTTPSAESTPQSTTVKIKNTTTTQILPSKPTTK

QRQNKPNKPNDFHFEVFNFPVPCISCSNNPTCWAICKRIPNKKPGKKTTKPTKKPT

LKTTKDKPKPQTTPKPEVLTTKPTGKPTINTTKNIRTTLLTSNTKGNPEHTSQEETL

HSTTSEGYLSPSQVYTTSGQEETLHSTTSEGYLSPSQVYTTSEYLSQSLSSSNTTK"

ORIGIN

1 ggaactacat cacaatccac caccatacta gcttcaacaa caccaagtgc tgagtcaacc

61 ccacaatcca caacagtcga gatcaaaaac acaacaacaa cccaatatt acctagcaaa

121 cccaccacaa aacaacgcca aaataaacca caaacaacac ccaacaatga tttcacttt  
181 gaagtgttca atttgtacc ctgcagcata tgcagcaaca atccaactg ctgggccatc  
241 tgcaagagaa taccaacaaa aaaacctgga aagaaaacca ccaccaagcc cacaaaaaaa  
301 ccaacctca agacaaccaa aaaagatecc aaacctcaaa ccacaaaacc aaaggaagta  
361 ctactacca agcctacagg aaagccaacc atcaacacca ctaaaacaaa catcagaact  
421 aactgctca cctccaacac caaaggaaat ccagaacaca caagtcaaga ggaaaccctc  
481 cactcaacca cctcgaagg ctatctaagc ccatcacaag tetatacaac atctggtaa  
541 gaggaacc tccactcaac cacctcgaag ggctatctaa gccatcaca agtctataca  
601 acatcagagt acctatcaca atctctatct tcatccaaca caacaaatg a

//

LOCUS KY327993 651 bp cRNA linear VRL 12-DEC-2016  
DEFINITION Human respiratory syncytial virus A isolate TH-CU/B10623/2014  
attachment glycoprotein gene, partial cds.

ACCESSION KY327993

VERSION KY327993

KEYWORDS .

SOURCE Human respiratory syncytial virus A

ORGANISM Human respiratory syncytial virus A

Viruses; ssRNA viruses; ssRNA negative-strand viruses;  
Mononegavirales; Pneumoviridae; Orthopneumovirus.

REFERENCE 1 (bases 1 to 651)

AUTHORS Thongpan,I., Mauleekoonphairoj,J., Vichiwattana,P., Korkong,S.,  
Vongpunsawad,S. and Poovorawan,Y.

TITLE Molecular Characterization of Respiratory Syncytial Virus in  
Thailand, 2012-2015

JOURNAL Unpublished

REFERENCE 2 (bases 1 to 651)

AUTHORS Thongpan,I., Mauleekoonphairoj,J., Vichiwattana,P., Korkong,S.,  
Vongpunsawad,S. and Poovorawan,Y.

TITLE Direct Submission

JOURNAL Submitted (13-DEC-2016) Department of Pediatrics, Center of  
Excellence in Clinical Virology, Faculty of Medicine, Chulalongkorn  
University, Bangkok 10330, Thailand

COMMENT ##Assembly-Data-START##

Assembly Method :: DNASTAR-Lasergene v. 6  
Sequencing Technology :: Sanger dideoxy sequencing  
##Assembly-Data-END##

FEATURES Location/Qualifiers

source 1..651

/organism="Human respiratory syncytial virus A"  
/mol\_type="viral cRNA"  
/isolate="TH-CU/B10623/2014"  
/host="Homo sapiens"  
/db\_xref="taxon:208893"  
/country="Thailand"  
/collection\_date="09-Aug-2014"  
/note="group: A"

CDS <1..651

/note="G protein"  
/codon\_start=1  
/product="attachment glycoprotein"  
/protein\_id="APY20334"  
/translation="GTTSQSTTILASTTPSAESTPQSTTVKIKNTTTTQILPSKTTTK  
QHQNKPQNKNPNDHFHFEVFNFPVPCISCSNNPTCWAICKRIPNKKPGKKTTKPTKKPT

LKTTKKDPKPQTTKPKVLTTKPTGKPTINTTKTNIRTTLLTSNTKGNPEHTSQEETL  
HSTTSEGYLSPSQVYTTSGQEETLHSTTSEGYLSPSQVYTTSEYLSQSLSSSNATK"

ORIGIN

1 ggaactacat cacaatccac caccatacta gcttcaacaa caccaagtgc tgagtcaacc  
61 ccacaatcca caacagtcaa gatcaaaaac acaacaacaa cccaaatatt acctagcaaa  
121 accaccacaa aacaacacca aaataaacca caaaacaac ccaacaatga tttcacttt  
181 gaagtggtca atttgtacc ctgcagcata tgcagcaaca atccaacctg ctgggccatc  
241 tgcaagagaa taccaaacaa aaaacctgga aagaaaacca ccaccaagcc cacaaaaaaa  
301 ccaacctca agacaaccaa aaaagatccc aaacctcaaa ccacaaaacc aaaggaagta  
361 ctactacca agctacagg aaagccaacc atcaacacca ctaaaacaaa catcagaact  
421 acattgctca cctccaacac caaaggaaat ccagaacaca caagtcaaga ggaaaccctc  
481 cactcaacca cctccgaagg ctatctaagc ccatacacaag tctatacaac atccgggtaa  
541 gaggaacc tccactcaac cacctccgaa gggtatctaa geccatcaca agtctataca  
601 acatccgagt acctatcaca atctctatct tcatccaacg caacaaaatg a

//

LOCUS KY327994 651 bp cRNA linear VRL 12-DEC-2016

DEFINITION Human respiratory syncytial virus A isolate TH-CU/CB20/2013  
attachment glycoprotein gene, partial cds.

ACCESSION KY327994

VERSION KY327994

KEYWORDS .

SOURCE Human respiratory syncytial virus A

ORGANISM Human respiratory syncytial virus A

Viruses; ssRNA viruses; ssRNA negative-strand viruses;  
Mononegavirales; Pneumoviridae; Orthopneumovirus.

REFERENCE 1 (bases 1 to 651)

AUTHORS Thongpan,I., Mauleekoonphairoj,J., Vichiwattana,P., Korkong,S.,  
Vongpunsawad,S. and Poovorawan,Y.

TITLE Molecular Characterization of Respiratory Syncytial Virus in  
Thailand, 2012-2015

JOURNAL Unpublished

REFERENCE 2 (bases 1 to 651)

AUTHORS Thongpan,I., Mauleekoonphairoj,J., Vichiwattana,P., Korkong,S.,  
Vongpunsawad,S. and Poovorawan,Y.

TITLE Direct Submission

JOURNAL Submitted (13-DEC-2016) Department of Pediatrics, Center of  
Excellence in Clinical Virology, Faculty of Medicine, Chulalongkorn  
University, Bangkok 10330, Thailand

COMMENT ##Assembly-Data-START##

Assembly Method :: DNASTAR-Lasergene v. 6  
Sequencing Technology :: Sanger dideoxy sequencing  
##Assembly-Data-END##

FEATURES Location/Qualifiers

source 1..651  
/organism="Human respiratory syncytial virus A"  
/mol\_type="viral cRNA"  
/isolate="TH-CU/CB20/2013"  
/host="Homo sapiens"  
/db\_xref="taxon:208893"  
/country="Thailand"  
/collection\_date="01-Jul-2013"  
/note="group: A"

CDS <1..651  
/note="G protein"

/codon\_start=1  
/product="attachment glycoprotein"  
/protein\_id="APY20335"  
/translation="GTTSQSTTILASTTPSAESTPQSTTVKIINTTTTQILPSKPTTK  
QRQNKPNKPNDFHFEVFNFPVPCISCSNNPTCWAICKRIPNKKPGKKTTKPTKKPT  
LKTTKDKPKPQTTKPKVLTTKPTGKPTINTTKNIRTTLLTSNTKGNPEHTSQEETL  
HSTTSEGYLSPSQVYTTSGQEETLHSTTSEGYSPSQVYTTSEYLSQSLSSSNTTK"

ORIGIN

1 ggaactacat cacaatccac caccatacta gcttcaacaa caccaagtgc tgagtcaacc  
61 ccacaatcca caacagtcaa gatcataaac acaacaacaa cccaaatatt acctagcaaa  
121 cccaccacaa aacaacgcca aaataaacca caaaacaaac ccaacaatga ttttacttt  
181 gaagtgttca atttgtacc ctgcagcata tgcagcaaca atccaacctg ctgggccatc  
241 tgcaagagaa taccaacaa aaaacctgga aagaaaacca ccaccaagcc cacaaaaaaa  
301 ccaacctca agacaacaa aaaagatccc aaacctcaaa ccacaaaacc aaaggaagta  
361 ctactacca agcctacagg aaagccaacc atcaacacca ctaaaacaaa catcagaact  
421 aactgtctca cctccaacac caaaggaaat ccagaacaca caagtcaaga ggaaacctc  
481 cactcaacca cctccgaagg ctatctaagc ccatcacaag tctatacaac atccggtaa  
541 gaggaaacc tcaactcaac cacctcgaag ggctatcaa gccatcaca agtctacaca  
601 acatccgagt acctatcaca atctctatcc tcatccaaca caacaaaatg a

//  
LOCUS KY327995 651 bp cRNA linear VRL 12-DEC-2016  
DEFINITION Human respiratory syncytial virus A isolate TH-CU/C3207/2012  
attachment glycoprotein gene, partial cds.

ACCESSION KY327995

VERSION KY327995

KEYWORDS .

SOURCE Human respiratory syncytial virus A

ORGANISM Human respiratory syncytial virus A

Viruses; ssRNA viruses; ssRNA negative-strand viruses;  
Mononegavirales; Pneumoviridae; Orthopneumovirus.

REFERENCE 1 (bases 1 to 651)

AUTHORS Thongpan,I., Mauleekoonphairoj,J., Vichiwattana,P., Korkong,S.,  
Vongpunsawad,S. and Poovorawan,Y.

TITLE Molecular Characterization of Respiratory Syncytial Virus in  
Thailand, 2012-2015

JOURNAL Unpublished

REFERENCE 2 (bases 1 to 651)

AUTHORS Thongpan,I., Mauleekoonphairoj,J., Vichiwattana,P., Korkong,S.,  
Vongpunsawad,S. and Poovorawan,Y.

TITLE Direct Submission

JOURNAL Submitted (13-DEC-2016) Department of Pediatrics, Center of  
Excellence in Clinical Virology, Faculty of Medicine, Chulalongkorn  
University, Bangkok 10330, Thailand

COMMENT ##Assembly-Data-START##

Assembly Method :: DNASTAR-Lasergene v. 6  
Sequencing Technology :: Sanger dideoxy sequencing  
##Assembly-Data-END##

FEATURES Location/Qualifiers

source 1..651  
/organism="Human respiratory syncytial virus A"  
/mol\_type="viral cRNA"  
/isolate="TH-CU/C3207/2012"  
/host="Homo sapiens"  
/db\_xref="taxon:208893"

/country="Thailand"  
/collection\_date="17-Sep-2012"  
/note="group: A"

CDS <1..651  
/note="G protein"  
/codon\_start=1  
/product="attachment glycoprotein"  
/protein\_id="APY20336"  
/translation="GTTSQSTTILASTTPSAESTPQSTTVKIKNTTTTQILPSKPTTK  
QRQNKPKQNKPNNDHFHFEVFNFPVPCISCSNNPTCWAICKRIPNKKPGKKT TTKPTKKPT  
LKT TTKKDPKPQT TTKPKEVL TTKPTGKPTINTTKT NIRTLLTSNTKGNPEHTS QEETL  
HSTTSEGYLSPSQVYTTSGQEETLHSTTSEGYLSPSQVYTTSEYLSQSLSSSNTTK"

ORIGIN

1 ggaactacat cacaatccac caccatacta gttcaacaa caccaagtgc tgagtcaacc  
61 ccacaatcca caacagtcaa gatcaaaaac acaacaacaa cccaaatatt acctagcaaa  
121 cccaccacaa aacaacgcca aaataaacca caaaacaaac ccaacaatga ttttcacttt  
181 gaagtgttca atttgtacc ctgcagcata tgcagcaaca atccaacctg ctgggccatc  
241 tgcaagagaa taccaacaa aaaacctgga aagaaaacca ccaccaagcc cacaaaaaaa  
301 ccaacctca agacaacaa aaaagatccc aaacctcaa ccacaaaacc aaaggaagta  
361 ctactacca agcctacagg aaagccaacc atcaacacca ctaaaacaaa catcagaact  
421 acactgetca cctccaacac caaaggaaat ccagaacaca caagtcaaga ggaaaccctc  
481 cactcaacca cctccgaagg ctatctaagc ccatcacaag tctatacaac atccggtcaa  
541 gaggaacecc tccactcaac cacctcegaa ggctatctaa gccatcaca agtctataca  
601 acatccgagt acctatcaca atctctatct tcaccaaca caacaaaatg a

//

LOCUS KY327996 651 bp cRNA linear VRL 12-DEC-2016  
DEFINITION Human respiratory syncytial virus A isolate TH-CU/C3242/2012  
attachment glycoprotein gene, partial cds.

ACCESSION KY327996

VERSION KY327996

KEYWORDS .

SOURCE Human respiratory syncytial virus A

ORGANISM Human respiratory syncytial virus A

Viruses; ssRNA viruses; ssRNA negative-strand viruses;  
Mononegavirales; Pneumoviridae; Orthopneumovirus.

REFERENCE 1 (bases 1 to 651)

AUTHORS Thongpan,I., Mauleekoonphairoj,J., Vichiwattana,P., Korkong,S.,  
Vongpunsawad,S. and Poovorawan,Y.

TITLE Molecular Characterization of Respiratory Syncytial Virus in  
Thailand, 2012-2015

JOURNAL Unpublished

REFERENCE 2 (bases 1 to 651)

AUTHORS Thongpan,I., Mauleekoonphairoj,J., Vichiwattana,P., Korkong,S.,  
Vongpunsawad,S. and Poovorawan,Y.

TITLE Direct Submission

JOURNAL Submitted (13-DEC-2016) Department of Pediatrics, Center of  
Excellence in Clinical Virology, Faculty of Medicine, Chulalongkorn  
University, Bangkok 10330, Thailand

COMMENT ##Assembly-Data-START##

Assembly Method :: DNASTAR-Lasergene v. 6  
Sequencing Technology :: Sanger dideoxy sequencing  
##Assembly-Data-END##

FEATURES Location/Qualifiers

source 1..651



/organism="Human respiratory syncytial virus A"  
/mol\_type="viral cRNA"  
/isolate="TH-CU/C3242/2012"  
/host="Homo sapiens"  
/db\_xref="taxon:208893"  
/country="Thailand"  
/collection\_date="25-Sep-2012"  
/note="group: A"

CDS <1..651  
/note="G protein"  
/codon\_start=1  
/product="attachment glycoprotein"  
/protein\_id="APY20337"  
/translation="GTTSQSTTILASTTPSAESTPQSTTVKIKNTTTTQILPSKPTTK  
QRQNKPNKPNDFHFEVFNFPVPCISCSNNPTCWAICKRIPNKKPGKKTITTKPTKKPT  
LKTTKKDPKPQTTKPKVLTTKPTGKPTINTTKNIRTTLLTSNTKGNPEHTSQEETL  
HSTTSEGYLSPSQVYTTSGQEETLHSTTSEGYLSPSQVYTTSEYLSQSLSSSNTTK"

#### ORIGIN

1 ggaactacat cacaatccac caccatacta gttcaacaa caccaagtgc tgagtaacc  
61 ccacaatcca caacagtcga gatcaaaaac acaacaaca cccaaatatt acctagcaaa  
121 cccaccacaa aacaacgcc aataaacca caaacaac ccaacaatga tttcacttt  
181 gaagtgtca atttgtacc ctgcagcata tgcagcaaca atccaacctg ctgggccatc  
241 tgcaagagaa taccaacaa aaaacctgga aagaaaacca ccaccaagcc cacaaaaaaa  
301 ccaacctca agacaacaa aaaagatecc aaacctcaaa ccacaaaacc aaaggaagta  
361 ctactacca agcctacagg aaagccaacc atcaacacca ctaaacaaca catcagaact  
421 aactgctca ctccaacac caaaggaaat ccagaacaca caagtcaaga ggaaaccctc  
481 cactcaacca cctcgaagg ctatctaagc ccatacaag ttatacaac atccggtaa  
541 gaggaacc tcaactaac cacctcgaa ggctatctaa gccatcaca agtctataca  
601 acatcagat acctatcaca atctctatct tcatcaaca caacaaatg a

//

LOCUS KY327997 651 bp cRNA linear VRL 12-DEC-2016  
DEFINITION Human respiratory syncytial virus A isolate TH-CU/C3140/2012  
attachment glycoprotein gene, partial cds.

ACCESSION KY327997

VERSION KY327997

KEYWORDS .

SOURCE Human respiratory syncytial virus A

ORGANISM Human respiratory syncytial virus A

Viruses; ssRNA viruses; ssRNA negative-strand viruses;  
Mononegavirales; Pneumoviridae; Orthopneumovirus.

REFERENCE 1 (bases 1 to 651)

AUTHORS Thongpan,I., Mauleekoonphairoj,J., Vichiwattana,P., Korkong,S.,  
Vongpunsawad,S. and Poovorawan,Y.

TITLE Molecular Characterization of Respiratory Syncytial Virus in  
Thailand, 2012-2015

JOURNAL Unpublished

REFERENCE 2 (bases 1 to 651)

AUTHORS Thongpan,I., Mauleekoonphairoj,J., Vichiwattana,P., Korkong,S.,  
Vongpunsawad,S. and Poovorawan,Y.

TITLE Direct Submission

JOURNAL Submitted (13-DEC-2016) Department of Pediatrics, Center of  
Excellence in Clinical Virology, Faculty of Medicine, Chulalongkorn  
University, Bangkok 10330, Thailand

COMMENT ##Assembly-Data-START##

Assembly Method :: DNASTAR-Lasergene v. 6  
Sequencing Technology :: Sanger dideoxy sequencing  
##Assembly-Data-END##

FEATURES Location/Qualifiers

source 1..651  
/organism="Human respiratory syncytial virus A"  
/mol\_type="viral cRNA"  
/isolate="TH-CU/C3140/2012"  
/host="Homo sapiens"  
/db\_xref="taxon:208893"  
/country="Thailand"  
/collection\_date="22-Aug-2012"  
/note="group: A"  
CDS <1..651  
/note="G protein"  
/codon\_start=1  
/product="attachment glycoprotein"  
/protein\_id="APY20338"  
/translation="GTTSQSTTILASTTPSAESTPQSTTVKIKNTTTTQILPSKPTTK  
QRQNKPNKPNDFHFEVFNFPVPCISCSNNPTCWAICKRIPNKKPGKTTTKPTKKPT  
LKTTKKDPKPQTTKPKVLTTKPTGKPTINTTKTNIRTTLLTSNTKGNPEHTSQEETL  
HSTTSEGYLSPSQVYTTSGQEETLHSTTSEGYLSPSQVYTTSEYLSQSLSSSNTTK"

ORIGIN

1 ggaactacat cacaatccac caccatacta gttcaacaa caccaagtgc tgagtcaacc  
61 ccacaatcca caacagtcga gatcaaaaaa acaacaacaa ccaaatatt acctagcaaa  
121 cccaccacaa aacaacgcca aaataaacca caaaacaaac ccaacaatga tttcacttt  
181 gaagtgttca atttgtacc tgcagcata tgcagcaaca atccaacctg ctgggccatc  
241 tgcaagagaa taccaacaa aaaacctgga aagaaaacca ccaccaagcc cacaaaaaaa  
301 ccaacctca agacaacaa aaaagatccc aaacctcaa ccacaaaacc aaaggaagta  
361 ctactacca agcctacagg aaagccaacc atcaacacca ctaaaacaaa catcagaact  
421 aactgetca cctcaacac caaaggaat ccagaacaca caagtaaga ggaaaccctc  
481 cactcaacca cctcgaagg ctatctaagc ccatacacaag ttatacaac atccggctca  
541 gaggaacc tccactcaac cacctcga ggctatctaa gccatcaca agtctataca  
601 acatccgagt acctatcaca atctctatct tcatccaaca caacaaatg a

//

LOCUS KY327998 651 bp cRNA linear VRL 12-DEC-2016  
DEFINITION Human respiratory syncytial virus A isolate TH-CU/C3208/2012  
attachment glycoprotein gene, partial cds.

ACCESSION KY327998

VERSION KY327998

KEYWORDS .

SOURCE Human respiratory syncytial virus A

ORGANISM Human respiratory syncytial virus A

Viruses; ssRNA viruses; ssRNA negative-strand viruses;  
Mononegavirales; Pneumoviridae; Orthopneumovirus.

REFERENCE 1 (bases 1 to 651)

AUTHORS Thongpan,I., Mauleekoonphairoj,J., Vichiwattana,P., Korkong,S.,  
Vongpunsawad,S. and Poovorawan,Y.

TITLE Molecular Characterization of Respiratory Syncytial Virus in  
Thailand, 2012-2015

JOURNAL Unpublished

REFERENCE 2 (bases 1 to 651)

AUTHORS Thongpan,I., Mauleekoonphairoj,J., Vichiwattana,P., Korkong,S.,  
Vongpunsawad,S. and Poovorawan,Y.

TITLE Direct Submission  
JOURNAL Submitted (13-DEC-2016) Department of Pediatrics, Center of  
Excellence in Clinical Virology, Faculty of Medicine, Chulalongkorn  
University, Bangkok 10330, Thailand

COMMENT ##Assembly-Data-START##  
Assembly Method :: DNASTAR-Lasergene v. 6  
Sequencing Technology :: Sanger dideoxy sequencing  
##Assembly-Data-END##

FEATURES Location/Qualifiers

source 1..651  
/organism="Human respiratory syncytial virus A"  
/mol\_type="viral cRNA"  
/isolate="TH-CU/C3208/2012"  
/host="Homo sapiens"  
/db\_xref="taxon:208893"  
/country="Thailand"  
/collection\_date="17-Sep-2012"  
/note="group: A"

CDS <1..651  
/note="G protein"  
/codon\_start=1  
/product="attachment glycoprotein"  
/protein\_id="APY20339"  
/translation="GTTSQSTTILASTTPSAESTPQSTTVKIKNTTTTQILPSKPTTK  
QRQNKPNKPNDFHFEVFNFPVPCISCSNNPTCWAICKRIPNKKPGKKTTKPTKKPT  
LKTTKKDPKPQTTKPKVLTTKPTGKPTINTTKNIRTTLLTSNTKGNPEHTSQEETL  
HSTTSEGYLSPSQVYTTSGQEETLHSTTSEGYLSPSQVYTTSEYLSQSLSSSNTTK"

ORIGIN

1 ggaactacat cacaatccac caccatacta gttcaacaa caccaagtgc tgagtcaacc  
61 ccacaatcca caacagtcaa gatcaaaaac acaacaacaa cccaaatatt acctagcaaa  
121 cccaccacaa aacaacgcca aaataaacca caaaacaaac ccaacaatga ttttacttt  
181 gaagtgttca atttgtacc ctgcagcata tgcagcaaca atccaacctg ctgggccatc  
241 tgcaagagaa taccaacaa aaaacctgga aagaaaacca ccaccaagcc cacaaaaaaa  
301 ccaacctca agacaacaa aaaagatccc aaacctcaa ccacaaaacc aaaggaagta  
361 ctactacca agctacagg aaagccaacc atcaacacca ctaaaacaaa catcagaact  
421 aactgtctca cctccaacac caaaggaaat ccagaacaca caagtcaaga ggaaacctc  
481 cactcaacca cctccgaagg ctatctaagc ccatacaag tctatacaac atctggtcaa  
541 gaggaacc tcaactcaac cacctcgaa ggctatctaa gccatcaca agctataca  
601 acatccgagt acctatcaca atctctatct tcatccaaca caacaaaatg a

//

LOCUS KY327999 651 bp cRNA linear VRL 12-DEC-2016  
DEFINITION Human respiratory syncytial virus A isolate TH-CU/B10810/2014  
attachment glycoprotein gene, partial cds.

ACCESSION KY327999

VERSION KY327999

KEYWORDS .

SOURCE Human respiratory syncytial virus A

ORGANISM Human respiratory syncytial virus A  
Viruses; ssRNA viruses; ssRNA negative-strand viruses;  
Mononegavirales; Pneumoviridae; Orthopneumovirus.

REFERENCE 1 (bases 1 to 651)

AUTHORS Thongpan,I., Mauleekoonphairoj,J., Vichiwattana,P., Korkong,S.,  
Vongpunsawad,S. and Poovorawan,Y.

TITLE Molecular Characterization of Respiratory Syncytial Virus in

Thailand, 2012-2015  
 JOURNAL Unpublished  
 REFERENCE 2 (bases 1 to 651)  
 AUTHORS Thongpan,I., Mauleekoonphairoj,J., Vichiwattana,P., Korkong,S.,  
 Vongpunsawad,S. and Poovorawan,Y.  
 TITLE Direct Submission  
 JOURNAL Submitted (13-DEC-2016) Department of Pediatrics, Center of  
 Excellence in Clinical Virology, Faculty of Medicine, Chulalongkorn  
 University, Bangkok 10330, Thailand  
 COMMENT ##Assembly-Data-START##  
 Assembly Method :: DNASTAR-Lasergene v. 6  
 Sequencing Technology :: Sanger dideoxy sequencing  
 ##Assembly-Data-END##  
 FEATURES Location/Qualifiers  
 source 1..651  
 /organism="Human respiratory syncytial virus A"  
 /mol\_type="viral cRNA"  
 /isolate="TH-CU/B10810/2014"  
 /host="Homo sapiens"  
 /db\_xref="taxon:208893"  
 /country="Thailand"  
 /collection\_date="28-Aug-2014"  
 /note="group: A"  
 CDS <1..651  
 /note="G protein"  
 /codon\_start=1  
 /product="attachment glycoprotein"  
 /protein\_id="APY20340"  
 /translation="GTTSQSTTILASTTPSAESTPQSTTVKIKNTTTTQILPSKPTTK  
 QRQNKPKQNKPNDFHFEVFNFVPCISCSNNPTCWAICKRIPNKKPGKKTTKPTKKPT  
 LKTTKKDKPKPQTTKPKVLTTKPTGKPTINTTKTNIRTTLLTSNTKGNPEHTSQEETL  
 HSTTSEGYLSPSQVYTTSGQEETLHSTTSEGYLSPSQVYTTSEYLSQSLSSSNTTK"  
 ORIGIN  
 1 ggaactacat cacaatccac caccatacta gcttcaaca caccaagtgc tgagtcaacc  
 61 ccacaatcca caacagtcaa gatcaaaaac acaacaaca cccaaatatt acctagcaaa  
 121 cccaccacaa aacaacgcca aaataaacca caaaacaac ccaacaatga ttttacttt  
 181 gaagtgttca atttgtacc ctgcagcata tgcagcaaca atccaacctg ctgggccatc  
 241 tgcaagagaa taccaacaa aaaacctgga aagaaaacca ccaccaagcc cacaaaaaaa  
 301 ccaacctca agacaacaa aaaagatccc aaacctcaa ccacaaaacc aaaggaagta  
 361 ctactacca agcccacagg aaagccaacc atcaacacca ctaaaacaaa catcagaact  
 421 acactgetca ctccaacac caaaggaaat ccagaacaca caagtcaaga ggaaaccctc  
 481 cactcaacca cctccgaagg ctatctaagc ccatcacaag tctatacaac atccggtcaa  
 541 gaggaaacc tccactcaac cacctcggaa ggctatctaa gccatcaca agtctataca  
 601 acatccgagt acctatcaca atctctatct teatccaaca caacaaaatg a  
 //  
 LOCUS KY328000 651 bp cRNA linear VRL 12-DEC-2016  
 DEFINITION Human respiratory syncytial virus A isolate TH-CU/C3434/2012  
 attachment glycoprotein gene, partial cds.  
 ACCESSION KY328000  
 VERSION KY328000  
 KEYWORDS .  
 SOURCE Human respiratory syncytial virus A  
 ORGANISM Human respiratory syncytial virus A  
 Viruses; ssRNA viruses; ssRNA negative-strand viruses;

Mononegavirales; Pneumoviridae; Orthopneumovirus.

REFERENCE 1 (bases 1 to 651)

AUTHORS Thongpan,I., Mauleekoonphairoj,J., Vichiwattana,P., Korkong,S.,  
Vongpunsawad,S. and Poovorawan,Y.

TITLE Molecular Characterization of Respiratory Syncytial Virus in  
Thailand, 2012-2015

JOURNAL Unpublished

REFERENCE 2 (bases 1 to 651)

AUTHORS Thongpan,I., Mauleekoonphairoj,J., Vichiwattana,P., Korkong,S.,  
Vongpunsawad,S. and Poovorawan,Y.

TITLE Direct Submission

JOURNAL Submitted (13-DEC-2016) Department of Pediatrics, Center of  
Excellence in Clinical Virology, Faculty of Medicine, Chulalongkorn  
University, Bangkok 10330, Thailand

COMMENT ##Assembly-Data-START##

Assembly Method :: DNASTAR-Lasergene v. 6  
Sequencing Technology :: Sanger dideoxy sequencing  
##Assembly-Data-END##

FEATURES Location/Qualifiers

source 1..651

/organism="Human respiratory syncytial virus A"  
/mol\_type="viral cRNA"  
/isolate="TH-CU/C3434/2012"  
/host="Homo sapiens"  
/db\_xref="taxon:208893"  
/country="Thailand"  
/collection\_date="18-Dec-2012"  
/note="group: A"

CDS <1..651

/note="G protein"  
/codon\_start=1  
/product="attachment glycoprotein"  
/protein\_id="APY20341"  
/translation="GTTSQSTTILASTTPSAESTPQSTTVKIKNITTTQILPSKPTTK  
QRQNKPKQNKPNDFHFEVFNFPVPCISCSNNPTCWAICKRIPNKKPGKKT TTKPTKKPT  
LKT TTKKDPKPKQT TTKPKEVL TTKPTGMPTINTTKT NIRTLLTSNTKGNPEHTS QEETL  
HSTTSEGYLSPSQVYTTSGQEETLHSTTSKGYLSPSQVYTTSEYLSQSLSSSNTTK"

ORIGIN

1 ggaactacat cacaatccac caccatacta gttcaacaa caccaagtgc ttagtcaacc  
61 ccacaatcca caacagteaa gatcaaaaac ataacaacaa cccaaatatt acctagcaaa  
121 cccaccacaa aacaacgcca aaataaacca caaaacaaac ccaacaatga tttcacttt  
181 gaagtgtca atttgtacc ctgcagcata tgcagcaaca atccaactg ctgggccatc  
241 tgcaagagaa taccaacaa aaaacctgga aagaaaacca ccaccaagcc cacaaaaaaa  
301 ccaacctca agacaacaa aaaagatecc aaaccccaaa ccacaaaacc aaaggaagta  
361 ctactacca agcctacagg aatgccaacc atcaacacca ctaaaacaaa catcagaact  
421 acactgetca cctccaacac caaaggaaat ccagaacaca caagtcaaga ggaaaccctc  
481 cactcaacca cctcgaagg ctatctaagc ccatacaag tetatacaac atccggtaaa  
541 gaggaacc tccactcaac cacctcaaa ggctatctaa gccatcaca agtctataca  
601 acatcagagt acctatcaca atctctatct teatccaaca caacaaaatg a

//

LOCUS KY328001 651 bp cRNA linear VRL 12-DEC-2016

DEFINITION Human respiratory syncytial virus A isolate TH-CU/B10631/2014  
attachment glycoprotein gene, partial cds.

ACCESSION KY328001

VERSION KY328001

KEYWORDS .

SOURCE Human respiratory syncytial virus A

ORGANISM Human respiratory syncytial virus A

Viruses; ssRNA viruses; ssRNA negative-strand viruses;  
Mononegavirales; Pneumoviridae; Orthopneumovirus.

REFERENCE 1 (bases 1 to 651)

AUTHORS Thongpan,I., Mauleekoonphairoj,J., Vichiwattana,P., Korkong,S.,  
Vongpunsawad,S. and Poovorawan,Y.

TITLE Molecular Characterization of Respiratory Syncytial Virus in  
Thailand, 2012-2015

JOURNAL Unpublished

REFERENCE 2 (bases 1 to 651)

AUTHORS Thongpan,I., Mauleekoonphairoj,J., Vichiwattana,P., Korkong,S.,  
Vongpunsawad,S. and Poovorawan,Y.

TITLE Direct Submission

JOURNAL Submitted (13-DEC-2016) Department of Pediatrics, Center of  
Excellence in Clinical Virology, Faculty of Medicine, Chulalongkorn  
University, Bangkok 10330, Thailand

COMMENT ##Assembly-Data-START##

Assembly Method :: DNASTAR-Lasergene v. 6  
Sequencing Technology :: Sanger dideoxy sequencing  
##Assembly-Data-END##

FEATURES Location/Qualifiers

source 1..651

/organism="Human respiratory syncytial virus A"  
/mol\_type="viral cRNA"  
/isolate="TH-CU/B10631/2014"  
/host="Homo sapiens"  
/db\_xref="taxon:208893"  
/country="Thailand"  
/collection\_date="10-Aug-2014"  
/note="group: A"

CDS <1..651

/note="G protein"  
/codon\_start=1  
/product="attachment glycoprotein"  
/protein\_id="APY20342"  
/translation="GTTSQSTTILASTTPSAESTPQSTTVKIKNTTTTQILPSKPTTK  
QRQNKPNKPNDFHFEVFNFPVPCISCSNNPTCWAICKRIPNKKPGKKT TTKPTKKPT  
LKT TTKDPKPQT TTKPKEVL TTKPTGKPTINTTKTNIRTTLLTSNTKGNPEHTS QEETL  
HSTTSEGYLSPSQVYTTSGQEETLHSTTSKGYSPSQVYTISEYLSQSLSSSNTTK"

ORIGIN

1 ggaactacat cacaatccac caccatacta gttcaacaa caccaagtgc tgagtcaacc  
61 ccacaatcca caacagtcaa gatcaaaaac acaacaacaa ccaaatatt acctagcaaa  
121 cccaccacaa aacaacgcca aaataaacca caaaacaac ccaacaatga tttcacttt  
181 gaagtgtca atttgtacc ctgcagcata tgcagcaaca atccaacctg ctgggccatc  
241 tgcaagagaa taccaacaa aaaacctgga aagaaaacca ccaccaagcc cacaaaaaaa  
301 ccaacctca agacaacaa aaaagatecc aaaccccaaa ccacaaaacc aaaggaagta  
361 ctactacca agctacagg aaagccaacc atcaacacca ctaaaacaaa catcagaact  
421 aactgetca cctcaacac caaaggaaat ccagaacaca caagtcaaga ggaaaccctc  
481 cactcaacca cctcgaagg ctatctaagc ccatacaag ttatacaac atccggctca  
541 gaggaacc tcaactaac cactccaaa ggctatcaa gccatcaca agtctacaca  
601 atatccgagt acctatcaca atctctatct tcatccaaca caacaaatg a

//  
LOCUS KY328002 651 bp cRNA linear VRL 12-DEC-2016  
DEFINITION Human respiratory syncytial virus A isolate TH-CU/B10633/2014  
attachment glycoprotein gene, partial cds.

ACCESSION KY328002

VERSION KY328002

KEYWORDS .

SOURCE Human respiratory syncytial virus A

ORGANISM Human respiratory syncytial virus A

Viruses; ssRNA viruses; ssRNA negative-strand viruses;

Mononegavirales; Pneumoviridae; Orthopneumovirus.

REFERENCE 1 (bases 1 to 651)

AUTHORS Thongpan,I., Mauleekoonphairoj,J., Vichiwattana,P., Korkong,S.,  
Vongpunsawad,S. and Poovorawan,Y.

TITLE Molecular Characterization of Respiratory Syncytial Virus in  
Thailand, 2012-2015

JOURNAL Unpublished

REFERENCE 2 (bases 1 to 651)

AUTHORS Thongpan,I., Mauleekoonphairoj,J., Vichiwattana,P., Korkong,S.,  
Vongpunsawad,S. and Poovorawan,Y.

TITLE Direct Submission

JOURNAL Submitted (13-DEC-2016) Department of Pediatrics, Center of  
Excellence in Clinical Virology, Faculty of Medicine, Chulalongkorn  
University, Bangkok 10330, Thailand

COMMENT ##Assembly-Data-START##

Assembly Method :: DNASTAR-Lasergene v. 6

Sequencing Technology :: Sanger dideoxy sequencing

##Assembly-Data-END##

FEATURES Location/Qualifiers

source 1..651  
/organism="Human respiratory syncytial virus A"  
/mol\_type="viral cRNA"  
/isolate="TH-CU/B10633/2014"  
/host="Homo sapiens"  
/db\_xref="taxon:208893"  
/country="Thailand"  
/collection\_date="10-Aug-2014"  
/note="group: A"

CDS <1..651  
/note="G protein"  
/codon\_start=1  
/product="attachment glycoprotein"  
/protein\_id="APY20343"  
/translation="GTTSQSTTILASTTPSAESTPQSTTVKIKNTTTTQILPSKPTTK  
QRQNKPNKPNDFHFEVFNFPVPCISCSNNPTCWAICKRIPNKKPGKKTTKPTKKPT  
LKTTKKDPKPQTTPKPEVLTKPTGKPTINTTKTNIPTLLTSNTKGNPEHTSQEETL  
HSTTSEGYLSPSQVYTTSGQEETLHSTTSKGYSPSQVYTTSEYLSQSLSSSNTTK"

ORIGIN

1 ggaactacat cacaatccac caccatacta gcttcaacaa caccaagtgc tgagtcaacc  
61 ccacaatcca caacagtcaa gatcaaaaac acaacaacaa cccaaatatt acctagcaaa  
121 cccaccacaa aacaacgcca aataaacca caaacaacaa ccaacaatga ttttacttt  
181 gaagtgttca atttgtacc ctgcagcata tgcagcaaca atccaacctg ctgggccatc  
241 tgcaagagaa taccaacaa aaaacctgga aagaaaacca ccaccaagcc cacaaaaaaa  
301 ccaacctca agacaacaa aaaagatccc aaaccccaaa ccacaaaacc aaaggaagta

361 ctactacca agcctacagg aaagccaacc atcaacacca ctaaacaaca catcagaact  
421 acactgctca cctccaacac caaaggaaat ccagaacaca caagtcaaga ggaaaccctc  
481 cactcaacca cctcgaagg ctatctaagc ccatacaag tctatacaac atccggtaa  
541 gaggaacc tccactcaac cacctcaaaa ggctatcaa gccatcaca agtctacaca  
601 acatcagagt acctatcaca atctctatct tcatacaaca caacaaaatg a

//

LOCUS KY328003 651 bp cRNA linear VRL 12-DEC-2016  
DEFINITION Human respiratory syncytial virus A isolate ON1/TH-CU448/2012  
attachment glycoprotein gene, partial cds.

ACCESSION KY328003

VERSION KY328003

KEYWORDS .

SOURCE Human respiratory syncytial virus A

ORGANISM Human respiratory syncytial virus A

Viruses; ssRNA viruses; ssRNA negative-strand viruses;  
Mononegavirales; Pneumoviridae; Orthopneumovirus.

REFERENCE 1 (bases 1 to 651)

AUTHORS Thongpan,I., Mauleekoonphairoj,J., Vichiwattana,P., Korkong,S.,  
Vongpunsawad,S. and Poovorawan,Y.

TITLE Molecular Characterization of Respiratory Syncytial Virus in  
Thailand, 2012-2015

JOURNAL Unpublished

REFERENCE 2 (bases 1 to 651)

AUTHORS Thongpan,I., Mauleekoonphairoj,J., Vichiwattana,P., Korkong,S.,  
Vongpunsawad,S. and Poovorawan,Y.

TITLE Direct Submission

JOURNAL Submitted (13-DEC-2016) Department of Pediatrics, Center of  
Excellence in Clinical Virology, Faculty of Medicine, Chulalongkorn  
University, Bangkok 10330, Thailand

COMMENT ##Assembly-Data-START##

Assembly Method :: DNASTAR-Lasergene v. 6  
Sequencing Technology :: Sanger dideoxy sequencing  
##Assembly-Data-END##

FEATURES Location/Qualifiers

source 1..651

/organism="Human respiratory syncytial virus A"  
/mol\_type="viral cRNA"  
/isolate="ON1/TH-CU448/2012"  
/host="Homo sapiens"  
/db\_xref="taxon:208893"  
/country="Thailand"  
/collection\_date="10-Sep-2012"  
/note="group: A"

CDS <1..651

/note="G protein"  
/codon\_start=1  
/product="attachment glycoprotein"  
/protein\_id="APY20344"  
/translation="GTTSQSTTILASTTPSAESTPQSTTVKIKNTTTTQILPSKPTTK  
QRQNKPKQNKPNDFHFEVFNFPVPCISCSNNPTCWAICKRIPNKKPGKKTTKPTKKPT  
LKTTKKDPKPQTTPKPEVLTKPTGKPTINTTKNIRTTLLTSNTKGNPEHTSQEETL  
HSTTSEGYLSPSQVYTTSGQEETLHSTTSKGYLSPSQVYTTSEYLSQSLSSSNTTK"

ORIGIN

1 ggaactacat cacaatccac caccatacta gcttcaaca caccaagtgc tgagtcaacc



61 ccacaatcca caacagtcaa gatcaaaaac acaacaacaa cccaaatatt acctagcaaa  
121 cccaccacaa aacaacgcc aataaaacca caaaacaaac ccaacaatga tttcacttt  
181 gaagtgttca atttgtacc ctgcagcata tgcagcaaca atccaacctg ctgggccatc  
241 tgcaagagaa taccaacaaa aaaacctgga aagaaaacca ccaccaagcc cacaaaaaaa  
301 ccaacctca agacaaccaa aaaagatccc aaaccccaaa ccacaaaacc aaaggaagta  
361 ctactacca agcctacagg aaagccaacc atcaacacca ctaaaacaaa catcagaact  
421 aactgetca cctcaacac caaaggaaat ccagaacaca caagtaaga ggaaaccctc  
481 cactcaacca cctcgaagg ctatctaagc ccatacacaag ttatacaac atccggctca  
541 gaggaacc tccactcaac cactccaaa ggctatctaa gccatcaca agtctataca  
601 acatccgagt acctatcaca atctctatct tcatacaaca caacaaaatg a

//

LOCUS KY328004 651 bp cRNA linear VRL 12-DEC-2016

DEFINITION Human respiratory syncytial virus A isolate TH-CU392/2012  
attachment glycoprotein gene, partial cds.

ACCESSION KY328004

VERSION KY328004

KEYWORDS .

SOURCE Human respiratory syncytial virus A

ORGANISM Human respiratory syncytial virus A

Viruses; ssRNA viruses; ssRNA negative-strand viruses;  
Mononegavirales; Pneumoviridae; Orthopneumovirus.

REFERENCE 1 (bases 1 to 651)

AUTHORS Thongpan,I., Mauleekoonphairoj,J., Vichiwattana,P., Korkong,S.,  
Vongpunsawad,S. and Poovorawan,Y.

TITLE Molecular Characterization of Respiratory Syncytial Virus in  
Thailand, 2012-2015

JOURNAL Unpublished

REFERENCE 2 (bases 1 to 651)

AUTHORS Thongpan,I., Mauleekoonphairoj,J., Vichiwattana,P., Korkong,S.,  
Vongpunsawad,S. and Poovorawan,Y.

TITLE Direct Submission

JOURNAL Submitted (13-DEC-2016) Department of Pediatrics, Center of  
Excellence in Clinical Virology, Faculty of Medicine, Chulalongkorn  
University, Bangkok 10330, Thailand

COMMENT ##Assembly-Data-START##

Assembly Method :: DNASTAR-Lasergene v. 6  
Sequencing Technology :: Sanger dideoxy sequencing  
##Assembly-Data-END##

FEATURES Location/Qualifiers

source 1..651

/organism="Human respiratory syncytial virus A"  
/mol\_type="viral cRNA"  
/isolate="TH-CU392/2012"  
/host="Homo sapiens"  
/db\_xref="taxon:208893"  
/country="Thailand"  
/collection\_date="05-Jul-2012"  
/note="group: A"

CDS <1..651

/note="G protein"  
/codon\_start=1  
/product="attachment glycoprotein"  
/protein\_id="APY20345"  
/translation="GTTSQSTTILASTTPSAESTPQSTTVKIKNTTTTQILPSKPTTK"

QRQNKPNKPNDFHFEVFNFVPCISCSNNPTCWAICKRIPNKKPGKKTTHKPTKKPT  
LKTTHKDPKPQTTPKPEVLTKPTGKPTINTTKNIRTTLLTSNTKGNPEHTSQEETL  
HSTTSEGYLSPSQVYTTSGQEETLHSTTSKGYLSPSQVYTTSEYLSQSLSSSNTTK"

ORIGIN

1 ggaactacat cacaatccac caccatacta gttcaacaa caccaagtgc tgagtcaacc  
61 ccacaatcca caacagtcaa gatcaaaaac acaacaacaa cccaaatatt acctagcaaa  
121 cccaccacaa aacaacgcca aaataaacca caaaacaaac ccaacaatga ttttacttt  
181 gaagtgttca atttgtacc ctgcagcata tgcagcaaca atccaacctg ctgggccatc  
241 tgcaagagaa taccaacaa aaaacctgga aagaaaacca ccaccaagcc cacaaaaaa  
301 ccaacctca agacaacaa aaaagatccc aaacccaaa ccacaaaacc aaaggaagta  
361 ctactacca agctacagg aaagccaacc atcaacacca ctaaaacaaa catcagaact  
421 aactgtctca cctccaacac caaaggaaat ccagaacaca caagtcaaga ggaaacctc  
481 cactcaacca cctccgaagg ctatctaagc ccatacaag tctatacaac atccggtaa  
541 gaggaacc tcaactaac cacctcaaa ggctatctaa gccatcaca agtctataca  
601 acatccgagt acctatcaca atctctatct tcatccaaca caacaaaatg a

//

LOCUS KY328005 651 bp cRNA linear VRL 12-DEC-2016

DEFINITION Human respiratory syncytial virus A isolate TH-CU495/2012  
attachment glycoprotein gene, partial cds.

ACCESSION KY328005

VERSION KY328005

KEYWORDS .

SOURCE Human respiratory syncytial virus A

ORGANISM Human respiratory syncytial virus A

Viruses; ssRNA viruses; ssRNA negative-strand viruses;  
Mononegavirales; Pneumoviridae; Orthopneumovirus.

REFERENCE 1 (bases 1 to 651)

AUTHORS Thongpan,I., Mauleekoonphairoj,J., Vichiwattana,P., Korkong,S.,  
Vongpunsawad,S. and Poovorawan,Y.

TITLE Molecular Characterization of Respiratory Syncytial Virus in  
Thailand, 2012-2015

JOURNAL Unpublished

REFERENCE 2 (bases 1 to 651)

AUTHORS Thongpan,I., Mauleekoonphairoj,J., Vichiwattana,P., Korkong,S.,  
Vongpunsawad,S. and Poovorawan,Y.

TITLE Direct Submission

JOURNAL Submitted (13-DEC-2016) Department of Pediatrics, Center of  
Excellence in Clinical Virology, Faculty of Medicine, Chulalongkorn  
University, Bangkok 10330, Thailand

COMMENT ##Assembly-Data-START##

Assembly Method :: DNASTAR-Lasergene v. 6  
Sequencing Technology :: Sanger dideoxy sequencing  
##Assembly-Data-END##

FEATURES Location/Qualifiers

source 1..651  
/organism="Human respiratory syncytial virus A"  
/mol\_type="viral cRNA"  
/isolate="TH-CU495/2012"  
/host="Homo sapiens"  
/db\_xref="taxon:208893"  
/country="Thailand"  
/collection\_date="15-Nov-2012"  
/note="group: A"

CDS <1..651

/note="G protein"  
/codon\_start=1  
/product="attachment glycoprotein"  
/protein\_id="APY20346"  
/translation="GTTSQSTTILASTTPSAESTPQSTTVKIKNTTTTQILPSKPTTK  
QRQNKPNKPNDFHFEVFNFPVPCISCSNNPTCWAICKRIPNKKPGKKTTKPTKKPT  
LKTTKKDPKPQTTPKPEVLTTKPTGKPTINTTKNIRTTLLTSNTKGNPEHTSQEETL  
HSTTSEGYLSPSQVYTTSGQEETLHSTTSKGYLSPSQVYTTSEYLSQSLSSSNTTK"

ORIGIN

1 ggaactacat cacaatccac caccatacta gttcaacaa caccaagtgc tgagtcaacc  
61 ccacaatcca caacagtcaa gatcaaaaac acaacaacaa cccaaatatt acctagcaaa  
121 cccaccacaa aacaacgcca aaataaacca caaaacaac ccaacaatga ttttacttt  
181 gaagtgttca atttgtacc ctgcagcata tgcagcaaca atccaacctg ctgggccatc  
241 tgcaagagaa taccaacaa aaaacctgga aagaaaacca ccaccaagcc cacaaaaaaa  
301 ccaacctca agacaacaa aaaagatccc aaaccceaaa ccacaaaacc aaaggaagta  
361 ctactacca agcctacagg aaagccaacc atcaacacca ctaaaacaaa catcagaact  
421 acactgetca cctccaacac caaaggaat ccagaacaca caagtcaaga ggaaaccctc  
481 cactcaacca cctccgaagg ctatctaagc ccatcacaag tctatacaac atccggtaa  
541 gaggaacc tccactcaac cacctceaaa ggctatctaa gccatcaca agtctataca  
601 acatccgagt acctatcaca atctctatct tcaccaaca caacaaaatg a

//

LOCUS KY328006 651 bp cRNA linear VRL 12-DEC-2016

DEFINITION Human respiratory syncytial virus A isolate TH-CU437/2012  
attachment glycoprotein gene, partial cds.

ACCESSION KY328006

VERSION KY328006

KEYWORDS .

SOURCE Human respiratory syncytial virus A

ORGANISM Human respiratory syncytial virus A

Viruses; ssRNA viruses; ssRNA negative-strand viruses;  
Mononegavirales; Pneumoviridae; Orthopneumovirus.

REFERENCE 1 (bases 1 to 651)

AUTHORS Thongpan,I., Mauleekoonphairoj,J., Vichiwattana,P., Korkong,S.,  
Vongpunsawad,S. and Poovorawan,Y.

TITLE Molecular Characterization of Respiratory Syncytial Virus in  
Thailand, 2012-2015

JOURNAL Unpublished

REFERENCE 2 (bases 1 to 651)

AUTHORS Thongpan,I., Mauleekoonphairoj,J., Vichiwattana,P., Korkong,S.,  
Vongpunsawad,S. and Poovorawan,Y.

TITLE Direct Submission

JOURNAL Submitted (13-DEC-2016) Department of Pediatrics, Center of  
Excellence in Clinical Virology, Faculty of Medicine, Chulalongkorn  
University, Bangkok 10330, Thailand

COMMENT ##Assembly-Data-START##

Assembly Method :: DNASTAR-Lasergene v. 6  
Sequencing Technology :: Sanger dideoxy sequencing  
##Assembly-Data-END##

FEATURES Location/Qualifiers

source 1..651  
/organism="Human respiratory syncytial virus A"  
/mol\_type="viral cRNA"  
/isolate="TH-CU437/2012"  
/host="Homo sapiens"

/db\_xref="taxon:208893"  
/country="Thailand"  
/collection\_date="03-Sep-2012"  
/note="group: A"

CDS <1..651  
/note="G protein"  
/codon\_start=1  
/product="attachment glycoprotein"  
/protein\_id="APY20347"  
/translation="GTTSQSTTILASTTPSAESTPQSTTVKIKNTTTTQILPSKPTTK  
QRQNKPNKPNDFHFEVFNFPVPCISCSNNPTCWAICKRIPNKKPGKKT TTKPTKKPT  
LKT TTKKDPKPKQTTKPKVLT TTKPTGKPTINTTKTNI RTTLLTSNTKGNPEHTSQEETL  
HSTTSEGYLSPSQVYTTSGQEETLHSTTSKGYLSPSQVYTTSEYLSQSLSSSNTTK"

ORIGIN

1 ggaactacat cacaatccac caccatacta gttcaacaa caccaagtgc tgagtaacc  
61 ccacaatcca caacagtea gatcaaaaac acaacaaca ccaaatatt acctagcaaa  
121 cccaccacaa aacaacgcca aaataacca caaacaac ccaacaatga tttcacttt  
181 gaagtgtca atttgtacc ctgcagcata tgcagcaaca atccaacctg ctgggcatc  
241 tgcaagagaa taccaacaa aaaacctgga aagaaaacca ccaccaagcc cacaaaaaaa  
301 ccaacctca agacaacaa aaaagatccc aaacccaaa ccacaaaacc aaaggaagta  
361 ctactacca agcctacagg aaagccaacc atcaacacca ctaaaacaaa catcagaact  
421 aactgctca cctcaacac caaaggaaat ccagaacaca caagtaaga ggaaaccctc  
481 cactcaacca cctcgaagg ctatctaagc ccatcacaag tetatacaac atccggtaa  
541 gaggaacc tccactcaac cacctcaaa ggctatctaa gccatcaca agtctataca  
601 acatcagagt acctatcaca atctctatct teatcaaca caacaaatg a

//  
LOCUS KY328007 651 bp cRNA linear VRL 12-DEC-2016  
DEFINITION Human respiratory syncytial virus A isolate TH-CU457/2012  
attachment glycoprotein gene, partial cds.

ACCESSION KY328007

VERSION KY328007

KEYWORDS .

SOURCE Human respiratory syncytial virus A

ORGANISM Human respiratory syncytial virus A  
Viruses; ssRNA viruses; ssRNA negative-strand viruses;  
Mononegavirales; Pneumoviridae; Orthopneumovirus.

REFERENCE 1 (bases 1 to 651)

AUTHORS Thongpan,I., Mauleekoonphairoj,J., Vichiwattana,P., Korkong,S.,  
Vongpunsawad,S. and Poovorawan,Y.

TITLE Molecular Characterization of Respiratory Syncytial Virus in  
Thailand, 2012-2015

JOURNAL Unpublished

REFERENCE 2 (bases 1 to 651)

AUTHORS Thongpan,I., Mauleekoonphairoj,J., Vichiwattana,P., Korkong,S.,  
Vongpunsawad,S. and Poovorawan,Y.

TITLE Direct Submission

JOURNAL Submitted (13-DEC-2016) Department of Pediatrics, Center of  
Excellence in Clinical Virology, Faculty of Medicine, Chulalongkorn  
University, Bangkok 10330, Thailand

COMMENT ##Assembly-Data-START##

Assembly Method :: DNASTAR-Lasergene v. 6  
Sequencing Technology :: Sanger dideoxy sequencing  
##Assembly-Data-END##

FEATURES Location/Qualifiers

source 1..651  
/organism="Human respiratory syncytial virus A"  
/mol\_type="viral cRNA"  
/isolate="TH-CU457/2012"  
/host="Homo sapiens"  
/db\_xref="taxon:208893"  
/country="Thailand"  
/collection\_date="17-Sep-2012"  
/note="group: A"  
CDS <1..651  
/note="G protein"  
/codon\_start=1  
/product="attachment glycoprotein"  
/protein\_id="APY20348"  
/translation="GTTSQSTTILASTTPSAESTPQSTTVKIKNTTTTQILPSKPTTK  
QRQNKPNKPNDFHFEVFNFPVPCISCSNNPTCWAICKRIPNKKPGKKT TTKPTKKPT  
LKT TTKDPKPQT TTKPKEVL TTKPTGKPTINTTKTNIRTTLLTSNTKGNPEHTS QEETL  
HSTTSEGYLSPSQVYTTSGQEETLHSTTSKGYLSPSQVYTTSEYLSQSLSSSNTTK"

ORIGIN

1 ggaactacat cacaatccac caccatacta gcttcaacaa caccaagtgc tgagtcaacc  
61 ccacaatcca caacagtcaa gatcaaaaac acaacaacaa cccaaatatt acctagcaaa  
121 cccaccacaa aacaacgcca aaataaacca caaaacaaac ccaacaatga tttcacttt  
181 gaagtgtca atttgtacc ctgcagcata tgcagcaaca atccaacctg ctgggccatc  
241 tgcaagagaa taccaaacaa aaaacctgga aagaaaacca ccaccaagcc cacaaaaaaa  
301 ccaacctca agacaaccaa aaaagatccc aaaccccaaa ccacaaaacc aaaggaagta  
361 ctactacca agcctacagg aaagccaacc atcaacacca ctaaaacaaa catcagaact  
421 aactgetca cctccaacac caaaggaaat ccagaacaca caagtcaaga ggaaaccctc  
481 cactcaacca cctccgaagg ctatctaagc ccatacacaag ttatacaac atccgggtaa  
541 gaggaacc tcaactcaac cactccaaa ggctatctaa gccatcaca agtctataca  
601 acatccgagt acctatcaca atctctatct tcatccaaca caacaaaatg a

//

LOCUS KY328008 651 bp cRNA linear VRL 12-DEC-2016

DEFINITION Human respiratory syncytial virus A isolate TH-CU456/2012  
attachment glycoprotein gene, partial cds.

ACCESSION KY328008

VERSION KY328008

KEYWORDS .

SOURCE Human respiratory syncytial virus A

ORGANISM Human respiratory syncytial virus A

Viruses; ssRNA viruses; ssRNA negative-strand viruses;  
Mononegavirales; Pneumoviridae; Orthopneumovirus.

REFERENCE 1 (bases 1 to 651)

AUTHORS Thongpan,I., Mauleekoonphairoj,J., Vichiwattana,P., Korkong,S.,  
Vongpunsawad,S. and Poovorawan,Y.

TITLE Molecular Characterization of Respiratory Syncytial Virus in  
Thailand, 2012-2015

JOURNAL Unpublished

REFERENCE 2 (bases 1 to 651)

AUTHORS Thongpan,I., Mauleekoonphairoj,J., Vichiwattana,P., Korkong,S.,  
Vongpunsawad,S. and Poovorawan,Y.

TITLE Direct Submission

JOURNAL Submitted (13-DEC-2016) Department of Pediatrics, Center of  
Excellence in Clinical Virology, Faculty of Medicine, Chulalongkorn  
University, Bangkok 10330, Thailand

COMMENT ##Assembly-Data-START##

Assembly Method :: DNASTAR-Lasergene v. 6  
Sequencing Technology :: Sanger dideoxy sequencing  
##Assembly-Data-END##

FEATURES Location/Qualifiers

source 1..651  
/organism="Human respiratory syncytial virus A"  
/mol\_type="viral cRNA"  
/isolate="TH-CU456/2012"  
/host="Homo sapiens"  
/db\_xref="taxon:208893"  
/country="Thailand"  
/collection\_date="17-Sep-2012"  
/note="group: A"

CDS <1..651  
/note="G protein"  
/codon\_start=1  
/product="attachment glycoprotein"  
/protein\_id="APY20349"  
/translation="GTTSQSTTILASTTPSAESTPQSTTVKIKNTTTTQILPSKPTTK  
QRQNKPKQNKPNDFHFEVFNFPVPCISCSNNPTCWAICKRIPNKKPGKKTTKPTKKPT  
LKTTKKDPKPQTTPKPEVLTTKPTGKPTINTTKNIRTTLLTSNTKGNPEHTSQEETL  
HSTTSEGYLSPSQVYTTSGQEETLHSTTSKGYLSPSQVYTTSEYLSQSLSSSNTTK"

ORIGIN

1 ggaactacat cacaatccac caccatacta gcttcaacaa caccaagtgc tgagtcaacc  
61 ccacaatcca caacagtcaa gatcaaaaac acaacaacaa cccaatatt acctagcaaa  
121 cccaccacaa aacaacgcca aataaacca caaaacaaac ccaacaatga ttttacttt  
181 gaagtgttca atttgtacc ctgcagcata tgcagcaaca atccaacctg ctgggccatc  
241 tgcaagagaa taccaacaa aaaacctgga aagaaaacca ccaccaagcc cacaaaaaaa  
301 ccaacctca agacaacaa aaaagatecc aaacccaaa ccacaaaacc aaaggaagta  
361 ctcactacca agcctacagg aaagccaacc atcaacacca ctaaaacaaa catcagaact  
421 aactgtctca cctccaacac caaaggaaat ccagaacaca caagtcaaga ggaaacctc  
481 cactcaacca cctccgaagg ctatctaagc ccatcacaag tctatacaac atccggtaa  
541 gaggaaacc tccactcaac cacctcaaa ggctatctaa gccatcaca ggtctataca  
601 acatccgagt acctatcaca atctctatct tcatccaaca caacaaaatg a

//

LOCUS KY328009 651 bp cRNA linear VRL 12-DEC-2016

DEFINITION Human respiratory syncytial virus A isolate TH-CU461/2012  
attachment glycoprotein gene, partial cds.

ACCESSION KY328009

VERSION KY328009

KEYWORDS .

SOURCE Human respiratory syncytial virus A

ORGANISM Human respiratory syncytial virus A

Viruses; ssRNA viruses; ssRNA negative-strand viruses;  
Mononegavirales; Pneumoviridae; Orthopneumovirus.

REFERENCE 1 (bases 1 to 651)

AUTHORS Thongpan,I., Mauleekoonphairoj,J., Vichiwattana,P., Korkong,S.,  
Vongpunsawad,S. and Poovorawan,Y.

TITLE Molecular Characterization of Respiratory Syncytial Virus in  
Thailand, 2012-2015

JOURNAL Unpublished

REFERENCE 2 (bases 1 to 651)

AUTHORS Thongpan,I., Mauleekoonphairoj,J., Vichiwattana,P., Korkong,S.,

Vongpunsawad,S. and Poovorawan,Y.

TITLE Direct Submission

JOURNAL Submitted (13-DEC-2016) Department of Pediatrics, Center of Excellence in Clinical Virology, Faculty of Medicine, Chulalongkorn University, Bangkok 10330, Thailand

COMMENT ##Assembly-Data-START##

Assembly Method :: DNASTAR-Lasergene v. 6  
Sequencing Technology :: Sanger dideoxy sequencing  
##Assembly-Data-END##

FEATURES Location/Qualifiers

source 1..651  
/organism="Human respiratory syncytial virus A"  
/mol\_type="viral cRNA"  
/isolate="TH-CU461/2012"  
/host="Homo sapiens"  
/db\_xref="taxon:208893"  
/country="Thailand"  
/collection\_date="17-Sep-2012"  
/note="group: A"

CDS <1..651  
/note="G protein"  
/codon\_start=1  
/product="attachment glycoprotein"  
/protein\_id="APY20350"  
/translation="GTTSQSTTILASTTPSAESTPQSTTVKIKNTTTTQILPSKPTTK  
QRQNKPNKPNNDHFVFNFPVPCISCSNNPTCWAICKRIPNKKPGKKTTTKPTKKPT  
LKTTKKDPKPQTTKPKVLTTKPTGKPTINTTKNIRTTLLTSNTKGNPEHTSQEETL  
HSTASEGYLSPSQVYTTSGQEETLHSTTSKGYLSPSQVYTTSEYLSQSLSSSNTTK"

ORIGIN

1 ggaactacat cacaatccac caccatacta gttcaacaa caccaagtgc tgagtcaacc  
61 ccacaatcca caacagtcaa gatcaaaaac acaacaacaa cccaaatatt acctagcaaa  
121 cccaccacaa aacaacgcca aaataaacca caaaacaaac ccaacaatga ttttcacttt  
181 gaagtgttca atttgtacc ctgcagcata tgcagcaaca atccaacctg ctgggccatc  
241 tgcaagagaa taccaacaa aaaacctgga aagaaaacca ccaccaagcc cacaaaaaaa  
301 ccaacctca agacaaccaa aaaagatccc aaaccceaaa ccacaaaacc aaaggaagta  
361 ctactacca agcctacagg aaagccaacc atcaacacca ctaaaacaaa catcagaact  
421 aactgetca cctccaacac caaaggaat ccagaacaca caagtcaaga ggaaaccctc  
481 cactcaaccg cctcgaagg ctatctaagc ccatcacaag tctatacaac atccggtcaa  
541 gaggaacec tcaactcaac cacctcaaaa ggctatctaa gccatcaca agtctataca  
601 acatccgagt acctatcaca atctctatct tcatccaaca caacaaaatg a

//

LOCUS KY328010 651 bp cRNA linear VRL 12-DEC-2016  
DEFINITION Human respiratory syncytial virus A isolate TH-CU/CB117/2013  
attachment glycoprotein gene, partial cds.

ACCESSION KY328010

VERSION KY328010

KEYWORDS .

SOURCE Human respiratory syncytial virus A

ORGANISM Human respiratory syncytial virus A  
Viruses; ssRNA viruses; ssRNA negative-strand viruses;  
Mononegavirales; Pneumoviridae; Orthopneumovirus.

REFERENCE 1 (bases 1 to 651)

AUTHORS Thongpan,I., Mauleekoonphairoj,J., Vichiwattana,P., Korkong,S.,  
Vongpunsawad,S. and Poovorawan,Y.

TITLE Molecular Characterization of Respiratory Syncytial Virus in  
Thailand, 2012-2015  
JOURNAL Unpublished  
REFERENCE 2 (bases 1 to 651)  
AUTHORS Thongpan,I., Mauleekoonphairoj,J., Vichiwattana,P., Korkong,S.,  
Vongpunsawad,S. and Poovorawan,Y.

TITLE Direct Submission  
JOURNAL Submitted (13-DEC-2016) Department of Pediatrics, Center of  
Excellence in Clinical Virology, Faculty of Medicine, Chulalongkorn  
University, Bangkok 10330, Thailand

COMMENT ##Assembly-Data-START##  
Assembly Method :: DNASTAR-Lasergene v. 6  
Sequencing Technology :: Sanger dideoxy sequencing  
##Assembly-Data-END##

FEATURES Location/Qualifiers

source 1..651  
/organism="Human respiratory syncytial virus A"  
/mol\_type="viral cRNA"  
/isolate="TH-CU/CB117/2013"  
/host="Homo sapiens"  
/db\_xref="taxon:208893"  
/country="Thailand"  
/collection\_date="02-Nov-2013"  
/note="group: A"

CDS <1..651  
/note="G protein"  
/codon\_start=1  
/product="attachment glycoprotein"  
/protein\_id="APY20351"  
/translation="GTTSQSTTILASTTPSAESTPQSTTVKIKNTTTTQILPSKPTTK  
QRQNKPNKPNDFHFEVFNFVPCISCSNNPTCWAICKRIPNKKPGKKTTKPTKKPT  
LKTTKKDPKPKQTTKPKVLTTKPTGKPTINTTKTNI RTLLTSNTKGNPEHTSQEGL  
HSTTSEGYLSPSQVYTISGQEETLHSTTSKGYLSPSQVYTTSEYLSQSLSSSNTTK"

ORIGIN

1 ggaactacat cacaatccac caccatacta gttcaacaa caccaagtgc tgagtaacc  
61 ccacaatcca caacagteaa gatcaaaaac acaacaacaa cccaaatatt acctagcaaa  
121 cccaccacaa aacaacgcca aaataaacca caaacaacac ccaacaatga tttcacttt  
181 gaagtgtca atttgtacc ctgcagcata tgcagcaaca atccaacctg ctgggccatc  
241 tgcaagagaa taccaaacaa aaaacctgga aagaaaacca ccaccaagcc cacaaaaaaa  
301 ccaacctca agacaaccaa aaaagatecc aaaccccaaa ccacaaaacc aaaggaagta  
361 ctactacca agcctacagg aaagccaacc atcaacacca ctaaacaacaa catcagaact  
421 aactgctca ctccaacac caaaggaaat ccagaacaca caagtcaaga gggaaccctc  
481 cactcaacca cctcgaagg ctatctaagc ccatacaag ctatacaat atccggtaa  
541 gaggaacc tccaactaac cacctcaaaa ggctatctaa gccatcaca agtctataca  
601 acatcagat acatcaca atctctatct teatccaaca caacaaaatg a

//

LOCUS KY328011 651 bp cRNA linear VRL 12-DEC-2016  
DEFINITION Human respiratory syncytial virus A isolate TH-CU/B12451/2015  
attachment glycoprotein gene, partial cds.

ACCESSION KY328011

VERSION KY328011

KEYWORDS .

SOURCE Human respiratory syncytial virus A

ORGANISM Human respiratory syncytial virus A



Viruses; ssRNA viruses; ssRNA negative-strand viruses;  
Mononegavirales; Pneumoviridae; Orthopneumovirus.

REFERENCE 1 (bases 1 to 651)

AUTHORS Thongpan,I., Mauleekoonphairoj,J., Vichiwattana,P., Korkong,S.,  
Vongpunsawad,S. and Poovorawan,Y.

TITLE Molecular Characterization of Respiratory Syncytial Virus in  
Thailand, 2012-2015

JOURNAL Unpublished

REFERENCE 2 (bases 1 to 651)

AUTHORS Thongpan,I., Mauleekoonphairoj,J., Vichiwattana,P., Korkong,S.,  
Vongpunsawad,S. and Poovorawan,Y.

TITLE Direct Submission

JOURNAL Submitted (13-DEC-2016) Department of Pediatrics, Center of  
Excellence in Clinical Virology, Faculty of Medicine, Chulalongkorn  
University, Bangkok 10330, Thailand

COMMENT ##Assembly-Data-START##

Assembly Method :: DNASTAR-Lasergene v. 6  
Sequencing Technology :: Sanger dideoxy sequencing  
##Assembly-Data-END##

FEATURES Location/Qualifiers

source 1..651  
/organism="Human respiratory syncytial virus A"  
/mol\_type="viral cRNA"  
/isolate="TH-CU/B12451/2015"  
/host="Homo sapiens"  
/db\_xref="taxon:208893"  
/country="Thailand"  
/collection\_date="01-Aug-2015"  
/note="group: A"

CDS <1..651  
/note="G protein"  
/codon\_start=1  
/product="attachment glycoprotein"  
/protein\_id="APY20352"  
/translation="GTTSQSTTILASTTPSAESTPQSTTVKIKNTTTTQILPSKPTTK  
QRQNKPNKPNDFHFEVFNFPVPCISCSNNPTCWAICKRIPNKKPGKTTTKPTKKPT  
LKTTKKDPKPKQTTKPKVLTTKPTGKPTINTTKTNIRTTLLTSNTKGNPEHTSQEETL  
HSTTSEGYLSPSQVYTTSGQEETLHSTTSEGHPRPSQVYTTSEYLSQSLSSSNTTK"

ORIGIN

1 ggaactacat cacaatccac caccatacta gttcaacaa caccaagtgc tgagtcaacc  
61 ccacaatcca caacagtcaa gatcaaaaac acaacaacaa ccaaatatt acctagcaaa  
121 cccaccacaa aacaacgcca aataaacca caaaacaac ccaacaatga tttcacttt  
181 gaagtgttca atttgtacc ctgcagcata tgcagcaaca atccaacctg ctgggccatc  
241 tgcaagagaa taccaacaaa aaaacctgga aagaaaacca ccaccaagcc cacaaaaaaa  
301 ccaacctca agacaaccaa aaaagatecc aaacctcaga ccacaaaacc aaaggaagta  
361 ctactacca agcctacagg aaagccaacc atcaacacca ctaaaacaaa catcagaact  
421 aactgetca cctccaacac caaaggaaat ccagaacaca caagtaaga ggaaaccctc  
481 cactcaacca cctcgaagg ctatctaagc ccatccaag ttatacaac atccgggtaa  
541 gaggaacc tccactcaac cacctcgaag ggccatcaa gaccatcaca agttataca  
601 acatccgagt acctatcaca atctctatct tcaccaaca caacaaaatg a

//

LOCUS KY328012 651 bp cRNA linear VRL 12-DEC-2016

DEFINITION Human respiratory syncytial virus A isolate TH-CU/C5161/2014  
attachment glycoprotein gene, partial cds.

ACCESSION KY328012

VERSION KY328012

KEYWORDS .

SOURCE Human respiratory syncytial virus A

ORGANISM Human respiratory syncytial virus A

Viruses; ssRNA viruses; ssRNA negative-strand viruses;  
Mononegavirales; Pneumoviridae; Orthopneumovirus.

REFERENCE 1 (bases 1 to 651)

AUTHORS Thongpan,I., Mauleekoonphairoj,J., Vichiwattana,P., Korkong,S.,  
Vongpunsawad,S. and Poovorawan,Y.

TITLE Molecular Characterization of Respiratory Syncytial Virus in  
Thailand, 2012-2015

JOURNAL Unpublished

REFERENCE 2 (bases 1 to 651)

AUTHORS Thongpan,I., Mauleekoonphairoj,J., Vichiwattana,P., Korkong,S.,  
Vongpunsawad,S. and Poovorawan,Y.

TITLE Direct Submission

JOURNAL Submitted (13-DEC-2016) Department of Pediatrics, Center of  
Excellence in Clinical Virology, Faculty of Medicine, Chulalongkorn  
University, Bangkok 10330, Thailand

COMMENT ##Assembly-Data-START##

Assembly Method :: DNASTAR-Lasergene v. 6  
Sequencing Technology :: Sanger dideoxy sequencing  
##Assembly-Data-END##

FEATURES Location/Qualifiers

source 1..651

/organism="Human respiratory syncytial virus A"  
/mol\_type="viral cRNA"  
/isolate="TH-CU/C5161/2014"  
/host="Homo sapiens"  
/db\_xref="taxon:208893"  
/country="Thailand"  
/collection\_date="08-Oct-2014"  
/note="group: A"

CDS <1..651

/note="G protein"  
/codon\_start=1  
/product="attachment glycoprotein"  
/protein\_id="APY20353"  
/translation="GTTSQSTTILASTTPSAESTPQSTTVKIINTTTTQILPSKPTTK  
QRQNKPNKPNDFHFEVFNFPVPCISCSNNPTCWAICKRIPNKKPGKKT TTKPTKKPT  
LKT TTKDKPKQT TTKPKEVL TTKPTGKPTINTTKT NIRT TLIISNTKGNPEHTSQKETL  
HSTTSEGYLSPSQVYTTSGQEETLHSTTSEGYLSPSQVYTTSEYLSQSLSSSNTTK"

ORIGIN

1 ggaactacat cacaatccac caccatacta gcttcaacaa caccaagtgc tgagtcaacc  
61 ccacaatcca caacagtcaa gatcataaac acaacaacaa cccaaatatt acctagcaaa  
121 cccaccacaa aacaacgcca aaataaacca caaaacaaac ccaacaatga ttttacttt  
181 gaagtgttca atttgtacc ctgcagcata tgcagcaaca atccaacctg ctgggccatc  
241 tgcaagagaa taccgaacaa aaaacctgga aagaaaacca ccaccaagcc cacaaaaaaa  
301 ccaacctca agacaaccaa aaaagatccc aaacctcaa ccacaaaacc aaaggaagta  
361 ctactacca agcctacagg aaagccaacc atcaacacca ctaaaacaaa catcagaact  
421 aactgatca tetctaacac caaaggaaat ccagaacaca caagtcaaaa gaaaccctc  
481 cactcaacca cctccgaagg ctatctaagc ccatacaag tctatacaac atccggtaa  
541 gaggaacc tccactcaac cacctcgaa ggctatctaa gccatcaca agtctataca

601 acatccgagt acctatcaca atctctatct tcatccaaca caacaaaatg a

//

LOCUS KY328013 651 bp cRNA linear VRL 12-DEC-2016  
DEFINITION Human respiratory syncytial virus A isolate TH-CU/B11007/2014  
attachment glycoprotein gene, partial cds.

ACCESSION KY328013

VERSION KY328013

KEYWORDS .

SOURCE Human respiratory syncytial virus A

ORGANISM Human respiratory syncytial virus A

Viruses; ssRNA viruses; ssRNA negative-strand viruses;  
Mononegavirales; Pneumoviridae; Orthopneumovirus.

REFERENCE 1 (bases 1 to 651)

AUTHORS Thongpan,I., Mauleekoonphairoj,J., Vichiwattana,P., Korkong,S.,  
Vongpunsawad,S. and Poovorawan,Y.

TITLE Molecular Characterization of Respiratory Syncytial Virus in  
Thailand, 2012-2015

JOURNAL Unpublished

REFERENCE 2 (bases 1 to 651)

AUTHORS Thongpan,I., Mauleekoonphairoj,J., Vichiwattana,P., Korkong,S.,  
Vongpunsawad,S. and Poovorawan,Y.

TITLE Direct Submission

JOURNAL Submitted (13-DEC-2016) Department of Pediatrics, Center of  
Excellence in Clinical Virology, Faculty of Medicine, Chulalongkorn  
University, Bangkok 10330, Thailand

COMMENT ##Assembly-Data-START##

Assembly Method :: DNASTAR-Lasergene v. 6  
Sequencing Technology :: Sanger dideoxy sequencing  
##Assembly-Data-END##

FEATURES Location/Qualifiers

source 1..651  
/organism="Human respiratory syncytial virus A"  
/mol\_type="viral cRNA"  
/isolate="TH-CU/B11007/2014"  
/host="Homo sapiens"  
/db\_xref="taxon:208893"  
/country="Thailand"  
/collection\_date="22-Sep-2014"  
/note="group: A"

CDS <1..651  
/note="G protein"  
/codon\_start=1  
/product="attachment glycoprotein"  
/protein\_id="APY20354"  
/translation="GTTSQSTTILASTTPSAESTPQSTTVKIINTTTTQISPSKPTTK  
QRQNKPKQNKPNDFHFEVFNFPVPCISCSNNPTCWAICKRIPNKKPGKKTTKPTKKPT  
LKTTKKDPKPKQTTKPKVLTTKPTGKPTINTTKTNIPTTLLISNTKGNPEHTSQKETL  
HSTTSEGYLSPSQVYTTSGQEETLHSTTSEGYLSPSQVYTTSEYLSQSLSSSNTTK"

ORIGIN

1 ggaactacat cacaatccac caccatacta gttcaacaa caccaagtgc cgagtcaacc  
61 ccacaatcca caacagtcaa gatcataaac acaacaacaa cccaaatata acccageaaa  
121 cccaccacaa aacaacgcca aaacaaccca caaaacaaac ccaacaatga ttttcactt  
181 gaagtgttca atttgtacc ctgcagcata tgcagcaaca atccaacctg ctgggccatc  
241 tgcaagagaa taccaacaa aaaacctgga aagaaaacca ccaccaagcc cacaaaaaaa

301 ccaacctca agacaaccaa aaaagatccc aaacctcaaa ccacaaaacc aaaggaagta  
361 ctactacca agcctacagg aaagccaacc atcaacacca ctaaaacaaa catcagaact  
421 aactgatca tetctaacac caaaggaaat ccagaacaca caagtcaaaa ggaaaccctc  
481 cactcaacca cctccgaagg ctatctaagc ccatacacaag tctatacaac atccgggtaa  
541 gaggaacc tccactcaac cacctccgaa ggctatctaa gccatcaca agtctataca  
601 acatccgagt acctatcaca atctctatct tcatccaaca caacaaaatg a

//

LOCUS KY328014 651 bp cRNA linear VRL 12-DEC-2016  
DEFINITION Human respiratory syncytial virus A isolate TH-CU/B10627/2014  
attachment glycoprotein gene, partial cds.

ACCESSION KY328014

VERSION KY328014

KEYWORDS .

SOURCE Human respiratory syncytial virus A

ORGANISM Human respiratory syncytial virus A

Viruses; ssRNA viruses; ssRNA negative-strand viruses;  
Mononegavirales; Pneumoviridae; Orthopneumovirus.

REFERENCE 1 (bases 1 to 651)

AUTHORS Thongpan,I., Mauleekoonphairoj,J., Vichiwattana,P., Korkong,S.,  
Vongpunsawad,S. and Poovorawan,Y.

TITLE Molecular Characterization of Respiratory Syncytial Virus in  
Thailand, 2012-2015

JOURNAL Unpublished

REFERENCE 2 (bases 1 to 651)

AUTHORS Thongpan,I., Mauleekoonphairoj,J., Vichiwattana,P., Korkong,S.,  
Vongpunsawad,S. and Poovorawan,Y.

TITLE Direct Submission

JOURNAL Submitted (13-DEC-2016) Department of Pediatrics, Center of  
Excellence in Clinical Virology, Faculty of Medicine, Chulalongkorn  
University, Bangkok 10330, Thailand

COMMENT ##Assembly-Data-START##

Assembly Method :: DNASTAR-Lasergene v. 6  
Sequencing Technology :: Sanger dideoxy sequencing  
##Assembly-Data-END##

FEATURES Location/Qualifiers

source 1..651

/organism="Human respiratory syncytial virus A"  
/mol\_type="viral cRNA"  
/isolate="TH-CU/B10627/2014"  
/host="Homo sapiens"  
/db\_xref="taxon:208893"  
/country="Thailand"  
/collection\_date="09-Aug-2014"  
/note="group: A"

CDS <1..651

/note="G protein"  
/codon\_start=1  
/product="attachment glycoprotein"  
/protein\_id="APY20355"  
/translation="GTTSQSTTILASTTPSAESTPQSTTVKIINTTTTQILPSKPTTK  
QRQNKPKQNKPNDFHFEVFNFPVPCISCSNNPTCWAICKRIPNKKPGKKTTKPTKKPT  
LKTTKKDPKPKQTTKPKVLTTKPTGKPTINTTKTNIRTTLIISNTKGNPEHTSQKETL  
HSTTSEGYLSPSQVYTTSGQEETLHSTTSEGYLSPSQVYTTSEYLSQSLSSSNTTK"

ORIGIN

1 ggaactacat cacaatccac caccatacta gcttcaacaa caccaagtgc tgagtcaacc  
61 ccacaatcca caacagtcaa gatcataaac acaacaacaa cccaaatatt acctagcaaa  
121 cccaccacaa aacaacgcca aaataaacca caaaacaaac ccaacaatga ttttacttt  
181 gaagtgttca atttgtacc ctgcagcata tgcagcaaca atccaacctg ctgggccatc  
241 tgcaagagaa taccaacaa aaaacctgga aagaaaacca ccaccaagcc cacaaaaaaa  
301 ccaacctca agacaacaa aaaagatccc aaacctcaaa ccacaaaacc aaaggaagta  
361 cteactacca agcctacagg aaagccaacc atcaacacca ctaaaacaaa catcagaact  
421 acactgatca tettaacac caaaggaaat ccagaacaca caagtcaaaa gaaaccctc  
481 cactcaacca cctccgaagg ctatctaagc ccatacaag tctataaac atccggtaa  
541 gaggaacc tccactcaac cacctcga ggctatctaa gccatcaca agtctataca  
601 acatccgagt acctatcaca atctctatct tcatccaaca caacaaaatg a

//

LOCUS KY328015 651 bp cRNA linear VRL 12-DEC-2016  
DEFINITION Human respiratory syncytial virus A isolate TH-CU/B10626/2014  
attachment glycoprotein gene, partial cds.

ACCESSION KY328015

VERSION KY328015

KEYWORDS .

SOURCE Human respiratory syncytial virus A

ORGANISM Human respiratory syncytial virus A

Viruses; ssRNA viruses; ssRNA negative-strand viruses;  
Mononegavirales; Pneumoviridae; Orthopneumovirus.

REFERENCE 1 (bases 1 to 651)

AUTHORS Thongpan,I., Mauleekoonphairoj,J., Vichiwattana,P., Korkong,S.,  
Vongpunsawad,S. and Poovorawan,Y.

TITLE Molecular Characterization of Respiratory Syncytial Virus in  
Thailand, 2012-2015

JOURNAL Unpublished

REFERENCE 2 (bases 1 to 651)

AUTHORS Thongpan,I., Mauleekoonphairoj,J., Vichiwattana,P., Korkong,S.,  
Vongpunsawad,S. and Poovorawan,Y.

TITLE Direct Submission

JOURNAL Submitted (13-DEC-2016) Department of Pediatrics, Center of  
Excellence in Clinical Virology, Faculty of Medicine, Chulalongkorn  
University, Bangkok 10330, Thailand

COMMENT ##Assembly-Data-START##

Assembly Method :: DNASTAR-Lasergene v. 6  
Sequencing Technology :: Sanger dideoxy sequencing  
##Assembly-Data-END##

FEATURES Location/Qualifiers

source 1..651  
/organism="Human respiratory syncytial virus A"  
/mol\_type="viral cRNA"  
/isolate="TH-CU/B10626/2014"  
/host="Homo sapiens"  
/db\_xref="taxon:208893"  
/country="Thailand"  
/collection\_date="09-Aug-2014"  
/note="group: A"

CDS <1..651  
/note="G protein"  
/codon\_start=1  
/product="attachment glycoprotein"  
/protein\_id="APY20356"

/translation="GTTSQSTTILASTTPSAESTPQSTTVKIINTTTTQILPSKPTTK  
QRQNKPKQNPNDHFHFEVFNFPVPCISCSNNPTCWAICKRIPNKKPGKKTTKPTKKPT  
LKTTKKDKPKPQTTKPKVLTTKPTGKPTINTTKNIRTTLIISNTKGNPEHTSQKETL  
HSTTSEGYLSPSQVYTTSGQEETLHSTTSEGYLSPSQVYTTSEYLSQSLSSSNTTK"

ORIGIN

1 ggaactacat cacaatccac caccatacta gttcaacaa caccaagtgc tgagtcaacc  
61 ccacaatcca caacagtcaa gatcataaac acaacaacaa cccaaatatt acctagcaaa  
121 cccaccacaa aacaacgcca aaataaacca caaaacaaac ccaacaatga tttcacttt  
181 gaagtgttca atttgtacc ctgcagcata tgcagcaaca atccaacctg ctgggccatc  
241 tgcaagagaa taccaacaa aaaacctgga aagaaaacca ccaccaagcc cacaaaaaaa  
301 ccaacctca agacaacaa aaaagatccc aaacctcaa ccacaaaacc aaaggaagta  
361 ctactacca agcctacagg aaagccaacc atcaacacca ctaaaacaaa catcagaact  
421 aactgatca tcttaacac caagggaaat ccagaacaca caagtcaaaa ggaaccctc  
481 cactcaacca cctccgaagg ctatctaagc ccatcacaag tctatacaac atccggtcaa  
541 gaggaacecc tcaactcaac cacctcggaa ggctatctaa gccatcaca agtctataca  
601 acatccgagt acctatcaca atctctatct tcaccaaca caacaaaatg a

//

LOCUS KY328016 651 bp cRNA linear VRL 12-DEC-2016  
DEFINITION Human respiratory syncytial virus A isolate TH-CU/C6282/2015  
attachment glycoprotein gene, partial cds.

ACCESSION KY328016

VERSION KY328016

KEYWORDS .

SOURCE Human respiratory syncytial virus A

ORGANISM Human respiratory syncytial virus A

Viruses; ssRNA viruses; ssRNA negative-strand viruses;  
Mononegavirales; Pneumoviridae; Orthopneumovirus.

REFERENCE 1 (bases 1 to 651)

AUTHORS Thongpan,I., Mauleekoonphairoj,J., Vichiwattana,P., Korkong,S.,  
Vongpunsawad,S. and Poovorawan,Y.

TITLE Molecular Characterization of Respiratory Syncytial Virus in  
Thailand, 2012-2015

JOURNAL Unpublished

REFERENCE 2 (bases 1 to 651)

AUTHORS Thongpan,I., Mauleekoonphairoj,J., Vichiwattana,P., Korkong,S.,  
Vongpunsawad,S. and Poovorawan,Y.

TITLE Direct Submission

JOURNAL Submitted (13-DEC-2016) Department of Pediatrics, Center of  
Excellence in Clinical Virology, Faculty of Medicine, Chulalongkorn  
University, Bangkok 10330, Thailand

COMMENT ##Assembly-Data-START##

Assembly Method :: DNASTAR-Lasergene v. 6  
Sequencing Technology :: Sanger dideoxy sequencing  
##Assembly-Data-END##

FEATURES Location/Qualifiers

source 1..651  
/organism="Human respiratory syncytial virus A"  
/mol\_type="viral cRNA"  
/isolate="TH-CU/C6282/2015"  
/host="Homo sapiens"  
/db\_xref="taxon:208893"  
/country="Thailand"  
/collection\_date="25-Nov-2015"  
/note="group: A"

CDS <1..651  
/note="G protein"  
/codon\_start=1  
/product="attachment glycoprotein"  
/protein\_id="APY20357"  
/translation="GTTSQSSTIRASTTPSAESTPQSTTVKIINTTTTQILPSKPTTK  
QRQNKPNKPNDFHFEVFNFPVPCISCSNNPTCWAICKRIPNKKPGKKTTKPTKKPT  
LKTTKKDPKPQTTKPKVLTTKPTGKPTINTTKTNIPTLLISNTKGNPEHTSQKETL  
HSTTSEGYLSPSQVYTTSGQEETLHSTASEGYLSPSQVYTTSEYLSQSLSSSNTTK"

ORIGIN

1 ggaactacat cacaatctc caccatacga gcttcaaca caccaagtgc tgagtcaacc  
61 ccacaatcca caacagtcga gatcataaac acaacaacaa cccaaatatt acctagcaaa  
121 cccaccacaa aacaacgcca aaataaacca caaacaacac ccaacaatga tttcacttt  
181 gaagtgtca atttgtacc ctgcagcata tgcagtaaca atccaactg ctgggccatc  
241 tgcaagagaa taccaacaa aaaacctgga aagaaaacca ccaccaagcc cacaaaaaaa  
301 ccaacctca aaacaacaa aaaagatecc aaacctcaaa ccacaaaacc aaaggaagta  
361 ctactacca agcctacagg aaagccaacc atcaacacca ctaaacaacaa catcagaact  
421 aactgctca tcttaacac caaaggaaat ccagaacaca caagtcaaaa gaaaccctc  
481 cactcaacca cctcgaagg ctatctaagc ccatacaag tctatacaac atccggtaa  
541 gaggaacc tccaactaac cgctcgaag ggctatctaa gccatcaca agtctataca  
601 acatcagat acctatcaca atctctatct tcatcaaca caacaaaatg a

//

LOCUS KY328017 651 bp cRNA linear VRL 12-DEC-2016  
DEFINITION Human respiratory syncytial virus A isolate TH-CU/B12805/2015  
attachment glycoprotein gene, partial cds.

ACCESSION KY328017

VERSION KY328017

KEYWORDS .

SOURCE Human respiratory syncytial virus A

ORGANISM Human respiratory syncytial virus A

Viruses; ssRNA viruses; ssRNA negative-strand viruses;  
Mononegavirales; Pneumoviridae; Orthopneumovirus.

REFERENCE 1 (bases 1 to 651)

AUTHORS Thongpan,I., Mauleekoonphairoj,J., Vichiwattana,P., Korkong,S.,  
Vongpunsawad,S. and Poovorawan,Y.

TITLE Molecular Characterization of Respiratory Syncytial Virus in  
Thailand, 2012-2015

JOURNAL Unpublished

REFERENCE 2 (bases 1 to 651)

AUTHORS Thongpan,I., Mauleekoonphairoj,J., Vichiwattana,P., Korkong,S.,  
Vongpunsawad,S. and Poovorawan,Y.

TITLE Direct Submission

JOURNAL Submitted (13-DEC-2016) Department of Pediatrics, Center of  
Excellence in Clinical Virology, Faculty of Medicine, Chulalongkorn  
University, Bangkok 10330, Thailand

COMMENT ##Assembly-Data-START##

Assembly Method :: DNASTAR-Lasergene v. 6  
Sequencing Technology :: Sanger dideoxy sequencing  
##Assembly-Data-END##

FEATURES Location/Qualifiers

source 1..651  
/organism="Human respiratory syncytial virus A"  
/mol\_type="viral cRNA"  
/isolate="TH-CU/B12805/2015"

/host="Homo sapiens"  
/db\_xref="taxon:208893"  
/country="Thailand"  
/collection\_date="02-Sep-2015"  
/note="group: A"

CDS

<1..651  
/note="G protein"  
/codon\_start=1  
/product="attachment glycoprotein"  
/protein\_id="APY20358"  
/translation="GTTSQSSTIRASTTPSAESTPQSTTVKIINTTTTQILPSKPTTK  
QRQNKPNKPNDFHFEVFNFPVPCISCSNNPTCWAICKRIPNKKPGKKTTKPTKKPT  
LKTTKKDPKPKQTTKPKVLTTKPTGKPTINTTKTNIRTTLLISNTKGNPEHTSQKETL  
HSTTSEGYPSPSQVYTTSGQEETLHSTTSEGYLSPSQVYTTSEYLSQSLSSSNTTK"

ORIGIN

1 ggaactacat cacaatctc caccatacga gcttcaaca caccaagtgc tgagtcaacc  
61 ccacaatcca caacagtcaa gatcataaac acaacaaca cccaatatt acctagcaaa  
121 cccaccacaa aacaacgcca aaataaacca caaaacaaac ccaacaatga tttcacttt  
181 gaagtgttca atttgtacc tgcagcata tgcagtaaca atccaacctg ttgggccatc  
241 tgcaagagaa taccaacaaa aaaacctgga aagaaaacca ccacaaacc cacaaaaaaa  
301 ccaacctca agacaaccaa aaaagatccc aaacctcaaa ccacaaaacc aaaggaagta  
361 ctactacca agcctacagg aaagccaacc atcaacacca ctaaaacaaa catcagaact  
421 aactgetca tettaaacac caagggaaat ccagaacaca caagtcaaaa ggaaaccctc  
481 cactcaacca cctcgaagg ctatccaage ccatcacaag tctacacaac atccggtcaa  
541 gaggaacc tccactcaac cacctccgaa ggctatctaa gccatcaca agtctataca  
601 acatccgagt acctatcaca atctctatct tcatccaaca caacaaaatg a

//

LOCUS KY328018 651 bp cRNA linear VRL 12-DEC-2016  
DEFINITION Human respiratory syncytial virus A isolate TH-CU/B12839/2015  
attachment glycoprotein gene, partial cds.

ACCESSION KY328018

VERSION KY328018

KEYWORDS .

SOURCE Human respiratory syncytial virus A

ORGANISM Human respiratory syncytial virus A  
Viruses; ssRNA viruses; ssRNA negative-strand viruses;  
Mononegavirales; Pneumoviridae; Orthopneumovirus.

REFERENCE 1 (bases 1 to 651)

AUTHORS Thongpan,I., Mauleekoonphairoj,J., Vichiwattana,P., Korkong,S.,  
Vongpunsawad,S. and Poovorawan,Y.

TITLE Molecular Characterization of Respiratory Syncytial Virus in  
Thailand, 2012-2015

JOURNAL Unpublished

REFERENCE 2 (bases 1 to 651)

AUTHORS Thongpan,I., Mauleekoonphairoj,J., Vichiwattana,P., Korkong,S.,  
Vongpunsawad,S. and Poovorawan,Y.

TITLE Direct Submission

JOURNAL Submitted (13-DEC-2016) Department of Pediatrics, Center of  
Excellence in Clinical Virology, Faculty of Medicine, Chulalongkorn  
University, Bangkok 10330, Thailand

COMMENT ##Assembly-Data-START##

Assembly Method :: DNASTAR-Lasergene v. 6  
Sequencing Technology :: Sanger dideoxy sequencing  
##Assembly-Data-END##



FEATURES Location/Qualifiers

source 1..651  
/organism="Human respiratory syncytial virus A"  
/mol\_type="viral cRNA"  
/isolate="TH-CU/B12839/2015"  
/host="Homo sapiens"  
/db\_xref="taxon:208893"  
/country="Thailand"  
/collection\_date="07-Sep-2015"  
/note="group: A"

CDS <1..651  
/note="G protein"  
/codon\_start=1  
/product="attachment glycoprotein"  
/protein\_id="APY20359"  
/translation="GTTSQSTTILASTTPSAESTPQSTTVKIINTTTTQILPSKPTTK  
QRQNKPNKPNDFHFEVFNFVPCSICSNPTCWAICKRIPNKKPGKKTTKPTKKPT  
LKTTKKDPKPQTTPKGVLTTKPTGKPTINTTKTNSRTLLTSNTKGNPEHTSQKETL  
HSTTSEGYLSPSQVYTTSGQEETLHSTTSEGYSPSQVYTTSEYLSQSLSSSNTTK"

ORIGIN

1 ggaactacat cacaatccac caccatacta gcttcaacaa caccaagtgc tgagtcaacc  
61 ccacaatcca caacagtcaa gatcataaac acaacaacaa cccaaatatt acctagcaaa  
121 cccaccacaa aacaacgcca aaataaacca caaaacaaac ccaacaatga ttttacttt  
181 gaagtgttca atttgtacc ctgcagcata tgcagcaaca atccaacctg ctgggccatc  
241 tgcaagagaa taccaacaa aaaacctgga aagaaaacca ccaccaagcc cacaaaaaaa  
301 ccaacctca agacaacaa aaaagatccc aaacctcaa ccacaaaacc aaaggaggta  
361 ctactacca agctacagg aaagccaacc atcaacacca ctaaaacaaa cagcagaact  
421 aactgtctca cctccaacac caaaggaaat ccagaacaca caagtcaaaa ggaaaccctc  
481 cactcaacca cctccgaagg ctatctaagc ccatacaag tctatacaac atccggtaa  
541 gaggaacc tcaactcaac cacctcgaa ggctatcaa gccatcaca agtctataca  
601 acatccgagt acctatcaca atctctatct tateccaaca caacaaaatg a

//

LOCUS KY328019 651 bp cRNA linear VRL 12-DEC-2016  
DEFINITION Human respiratory syncytial virus A isolate TH-CU/B13046/2015  
attachment glycoprotein gene, partial cds.

ACCESSION KY328019

VERSION KY328019

KEYWORDS .

SOURCE Human respiratory syncytial virus A

ORGANISM Human respiratory syncytial virus A

Viruses; ssRNA viruses; ssRNA negative-strand viruses;  
Mononegavirales; Pneumoviridae; Orthopneumovirus.

REFERENCE 1 (bases 1 to 651)

AUTHORS Thongpan,I., Mauleekoonphairoj,J., Vichiwattana,P., Korkong,S.,  
Vongpunsawad,S. and Poovorawan,Y.

TITLE Molecular Characterization of Respiratory Syncytial Virus in  
Thailand, 2012-2015

JOURNAL Unpublished

REFERENCE 2 (bases 1 to 651)

AUTHORS Thongpan,I., Mauleekoonphairoj,J., Vichiwattana,P., Korkong,S.,  
Vongpunsawad,S. and Poovorawan,Y.

TITLE Direct Submission

JOURNAL Submitted (13-DEC-2016) Department of Pediatrics, Center of  
Excellence in Clinical Virology, Faculty of Medicine, Chulalongkorn

University, Bangkok 10330, Thailand

COMMENT ##Assembly-Data-START##

Assembly Method :: DNASTAR-Lasergene v. 6  
Sequencing Technology :: Sanger dideoxy sequencing  
##Assembly-Data-END##

FEATURES Location/Qualifiers

source 1..651  
/organism="Human respiratory syncytial virus A"  
/mol\_type="viral cRNA"  
/isolate="TH-CU/B13046/2015"  
/host="Homo sapiens"  
/db\_xref="taxon:208893"  
/country="Thailand"  
/collection\_date="21-Sep-2015"  
/note="group: A"

CDS <1..651  
/note="G protein"  
/codon\_start=1  
/product="attachment glycoprotein"  
/protein\_id="APY20360"  
/translation="GTTSQSTTILASTTPSAESTPQSTTVKIINTTTTQILPSKPTTK  
QRQNKPKQNKPNDFHFEVFNFVPCISCSNNPTCWAICKRIPNKKPGKKTTKPTKKPT  
LKTTKKDPKPQTTKPKGVLTTKPTGKPTINTTKTNSRTLLTSNTKGNPEHTSQKETL  
HSTTSEGYLSPSQVYTTSGQEETLHSTTSEGYSPSPQVYTTSEYLSQSLSSSNTTK"

ORIGIN

1 ggaactacat cacaatccac caccatacta gttcaacaa caccaagtgc tgagtcaacc  
61 ccacaatcca caacagtcaa gatcataaac acaacaacaa cccaaatatt acctagcaaa  
121 cccaccacaa aacaacgcca aaataaacca caaaacaaac ccaacaatga ttttcacttt  
181 gaagtgttca atttgtacc ctgcagcata tgcagcaaca atccaacctg ctgggccatc  
241 tgcaagagaa taccaacaa aaaacctgga aagaaaacca ccaccaagcc cacaaaaaaa  
301 ccaacctca agacaacaa aaaagatccc aaacctcaaa ccacaaaacc aaaggagta  
361 ctactacca agcctacagg aaagccaacc atcaacacca ctaaaacaaa cagcagaact  
421 acactgetca cctccaacac caaaggaat ccagaacaca caagtcaaaa ggaaaccctc  
481 cactcaacca cctccgaagg ctatctaagc ccatcacaag tctatacaac atccgggtaa  
541 gaggaaacc tccactcaac cacctcggaa ggctatcaa gcccataca agtctataca  
601 acatccgagt acctataca atctctatct tcatacaaca caacaaaatg a

//

LOCUS KY328020 651 bp cRNA linear VRL 12-DEC-2016

DEFINITION Human respiratory syncytial virus A isolate ON1/TH-CU/B12560/2015  
attachment glycoprotein gene, partial cds.

ACCESSION KY328020

VERSION KY328020

KEYWORDS .

SOURCE Human respiratory syncytial virus A

ORGANISM Human respiratory syncytial virus A

Viruses; ssRNA viruses; ssRNA negative-strand viruses;  
Mononegavirales; Pneumoviridae; Orthopneumovirus.

REFERENCE 1 (bases 1 to 651)

AUTHORS Thongpan,I., Mauleekoonphairoj,J., Vichiwattana,P., Korkong,S.,  
Vongpunsawad,S. and Poovorawan,Y.

TITLE Molecular Characterization of Respiratory Syncytial Virus in  
Thailand, 2012-2015

JOURNAL Unpublished

REFERENCE 2 (bases 1 to 651)

AUTHORS Thongpan,I., Mauleekoonphairoj,J., Vichiwattana,P., Korkong,S.,  
Vongpunsawad,S. and Poovorawan,Y.

TITLE Direct Submission

JOURNAL Submitted (13-DEC-2016) Department of Pediatrics, Center of  
Excellence in Clinical Virology, Faculty of Medicine, Chulalongkorn  
University, Bangkok 10330, Thailand

COMMENT ##Assembly-Data-START##

Assembly Method :: DNASTAR-Lasergene v. 6  
Sequencing Technology :: Sanger dideoxy sequencing  
##Assembly-Data-END##

FEATURES Location/Qualifiers

source 1..651  
/organism="Human respiratory syncytial virus A"  
/mol\_type="viral cRNA"  
/isolate="ON1/TH-CU/B12560/2015"  
/host="Homo sapiens"  
/db\_xref="taxon:208893"  
/country="Thailand"  
/collection\_date="16-Aug-2015"  
/note="group: A"

CDS <1..651  
/note="G protein"  
/codon\_start=1  
/product="attachment glycoprotein"  
/protein\_id="APY20361"  
/translation="GTTSQSTTILASTTPSAESTPQSTTVKIINTTTTQILPSKPTTK  
QRQNKPKQNKPNDFHFEVFNFPVPCISCSNNPTCWAICKRIPNKKPGKKT TTKPTKKPT  
LKT TTKKDPKPKQTTKPKVELTTKPTGKPTINTTKTNSRTTLLTSNTKGNPEHTSQKETL  
HSTTSEGYLSPSQVYTTSGQEETLHSTTSEGYSPSPQVYTTSEYLSQSLSSSNTTK"

ORIGIN

1 ggaactacat cacaatccac caccatacta gttcaacaa caccaagtgc ttagtcaacc  
61 ccacaatcca caacagctca gatcataaac acaacaacaa cccaaatatt acctagcaaa  
121 cccaccacaa aacaagccca aaataaacca caaacaacac ccaacaatga tttcacttt  
181 gaagtgttca atttgtacc ctgcagcata ttagcaaca atccaacctg ctgggccatc  
241 tgcaagagaa taccaacaa aaaacctgga aagaaaacca ccaccaagcc cacaaaaaaa  
301 ccaacctca agacaacaa aaaagatecc aaacctcaaa ccacaaaacc aaaggaagta  
361 ctactacca agcctacagg aaagccaacc atcaacacca ctaaaacaaa cagcagaact  
421 acactgctca cctccaacac caaaggaaat ccagaacaca caagtcaaaa ggaaaccctc  
481 cactcaacca cctcgaagg ctatctaagc ccatcacaag tetatacaac atccggctca  
541 gaggaacc tccactcaac cacctcgaag ggctatcaaa gccatcaca agtctatata  
601 acatccgagt acctatcaca atctctatct teatccaaca caacaaaatg a

//

LOCUS KY328021 651 bp cRNA linear VRL 12-DEC-2016  
DEFINITION Human respiratory syncytial virus A isolate TH-CU/C5068/2014  
attachment glycoprotein gene, partial cds.

ACCESSION KY328021

VERSION KY328021

KEYWORDS .

SOURCE Human respiratory syncytial virus A

ORGANISM Human respiratory syncytial virus A  
Viruses; ssRNA viruses; ssRNA negative-strand viruses;  
Mononegavirales; Pneumoviridae; Orthopneumovirus.

REFERENCE 1 (bases 1 to 651)

AUTHORS Thongpan,I., Mauleekoonphairoj,J., Vichiwattana,P., Korkong,S.,

Vongpunsawad,S. and Poovorawan,Y.  
 TITLE Molecular Characterization of Respiratory Syncytial Virus in  
 Thailand, 2012-2015  
 JOURNAL Unpublished  
 REFERENCE 2 (bases 1 to 651)  
 AUTHORS Thongpan,I., Mauleekoonphairoj,J., Vichiwattana,P., Korkong,S.,  
 Vongpunsawad,S. and Poovorawan,Y.  
 TITLE Direct Submission  
 JOURNAL Submitted (13-DEC-2016) Department of Pediatrics, Center of  
 Excellence in Clinical Virology, Faculty of Medicine, Chulalongkorn  
 University, Bangkok 10330, Thailand  
 COMMENT ##Assembly-Data-START##  
 Assembly Method :: DNASTAR-Lasergene v. 6  
 Sequencing Technology :: Sanger dideoxy sequencing  
 ##Assembly-Data-END##  
 FEATURES Location/Qualifiers  
 source 1..651  
 /organism="Human respiratory syncytial virus A"  
 /mol\_type="viral cRNA"  
 /isolate="TH-CU/C5068/2014"  
 /host="Homo sapiens"  
 /db\_xref="taxon:208893"  
 /country="Thailand"  
 /collection\_date="10-Sep-2014"  
 /note="group: A"  
 CDS <1..651  
 /note="G protein"  
 /codon\_start=1  
 /product="attachment glycoprotein"  
 /protein\_id="APY20362"  
 /translation="GTTSQSTTILASTTPSAESTPQSTTVKIKNTTTTQILPSKPTTK  
 QRQNKPNKPNDFHFEVFNFPVPCISCSNNPTCWAICKRIPNKKPGKKT TTKPTKKPT  
 LKTTKPKDPKPTTKPKEVLTKPTGKPTINTTKTNIRTTLLTSNTKGNPEHTSQKETL  
 HSTTSEGLHSPSQVHTTSGQEETLHSTTSESYLSPSQVYTTSEYLSQSLSSSNTTK"  
 ORIGIN  
 1 ggaactacat cacaatccac caccatacta gttcaacaa caccaagtgc tgagtcaacc  
 61 ccacaatcca caacagtcaa gatcaaaaac acaacaaca ccaaatatt acctagcaaa  
 121 cccaccacia aacaacgcca aaataaacca caaaacaac ccaacaatga tttcacttt  
 181 gaagtgtca atttgtacc ctgcagcata tgcagcaaca atccaacctg ctgggccatc  
 241 tgcaagagaa taccaaaca aaaacctgga aagaaaacca ccaccaagcc cacaaaaaaa  
 301 ccaacctca agacaacca aaaagatecc aaacctcaa ccacaaaacc aaaggaagta  
 361 ctcaacca agcctacagg aaagccaacc atcaacacca ctaaaacaaa catcagaact  
 421 aactgetca cctcaacac caaaggaaat ccagaacaca caagtcaaaa ggaaacctc  
 481 cactcaacca cctccgaagg ccatctaage ccatcacaag tccatacaac atccgggtcaa  
 541 gaggaacc tcaactcaac cacctcgaa agctatctaa gccatcaca agtctataca  
 601 acatccgagt acctatca atctctatct tcatccaaca caacaaatg a  
 //  
 LOCUS KY328022 651 bp cRNA linear VRL 12-DEC-2016  
 DEFINITION Human respiratory syncytial virus A isolate TH-CU/C5052/2014  
 attachment glycoprotein gene, partial cds.  
 ACCESSION KY328022  
 VERSION KY328022  
 KEYWORDS .  
 SOURCE Human respiratory syncytial virus A

ORGANISM Human respiratory syncytial virus A  
Viruses; ssRNA viruses; ssRNA negative-strand viruses;  
Mononegavirales; Pneumoviridae; Orthopneumovirus.

REFERENCE 1 (bases 1 to 651)

AUTHORS Thongpan,I., Mauleekoonphairoj,J., Vichiwattana,P., Korkong,S.,  
Vongpunsawad,S. and Poovorawan,Y.

TITLE Molecular Characterization of Respiratory Syncytial Virus in  
Thailand, 2012-2015

JOURNAL Unpublished

REFERENCE 2 (bases 1 to 651)

AUTHORS Thongpan,I., Mauleekoonphairoj,J., Vichiwattana,P., Korkong,S.,  
Vongpunsawad,S. and Poovorawan,Y.

TITLE Direct Submission

JOURNAL Submitted (13-DEC-2016) Department of Pediatrics, Center of  
Excellence in Clinical Virology, Faculty of Medicine, Chulalongkorn  
University, Bangkok 10330, Thailand

COMMENT ##Assembly-Data-START##

Assembly Method :: DNASTAR-Lasergene v. 6  
Sequencing Technology :: Sanger dideoxy sequencing  
##Assembly-Data-END##

FEATURES Location/Qualifiers

source 1..651  
/organism="Human respiratory syncytial virus A"  
/mol\_type="viral cRNA"  
/isolate="TH-CU/C5052/2014"  
/host="Homo sapiens"  
/db\_xref="taxon:208893"  
/country="Thailand"  
/collection\_date="27-Aug-2014"  
/note="group: A"

CDS <1..651  
/note="G protein"  
/codon\_start=1  
/product="attachment glycoprotein"  
/protein\_id="APY20363"  
/translation="GTTLQSTTILASTTPSAESTPQSTTVKIINTTTTQILPSKPTTK  
QRQNKPNKPNDFHFEVFNFPVPCISCSNNPTCWAICKRIPNKKPGKKTTKPTKKPT  
LKTTKKDPKPQTTPKPEALTKPTGKPTINTTKTNIPTLLTSNTKGNPEHTSQKETL  
HSTTSEGHSPSPVHTTSGQEETLHSTTSEYSPSPQVYTTSEYPSQSPSSNTTK"

ORIGIN

1 ggaactacat tacaatccac caccatacta gcttcaacaa caccaagtgc tgagtcaacc  
61 ccacaatcca caacagtcaa gatcataaac acaacaacaa cccaaatatt acctagcaaa  
121 cccaccacaa aacaacgcca aataaacca caaaacaaac ccaacaatga ttttacttt  
181 gaagtgttca atttgtacc ctgcagcata tgcagcaaca atccaacctg ctgggccatc  
241 tgcaagagaa taccaacaa aaaacctgga aagaaaacca ccaccaagcc cacaaaaaaa  
301 ccaacctca agacaacaa aaaagatccc aaacctcaaa ccacaaaacc aaaggaagca  
361 ctacaacca agcccacagg aaagccaacc atcaacacca ccaaaacaaa catcagaact  
421 aactgctca cctccaacac caaaggaaat ccagaacaca caagtcaaaa ggaaaccctc  
481 cactcaacca cctccgaagg ccatccaagc ccatcacaag tccatacaac atccgggtcaa  
541 gaggaaacc tccactcaac cacctcggaa agctatccaa gccatcaca agtctataca  
601 acatccgagt acctatcaca atctcatct tcatccaaca caacaaatg a

//

LOCUS KY328023 651 bp cRNA linear VRL 12-DEC-2016  
DEFINITION Human respiratory syncytial virus A isolate TH-CU/C5158/2014

attachment glycoprotein gene, partial cds.

ACCESSION KY328023

VERSION KY328023

KEYWORDS .

SOURCE Human respiratory syncytial virus A

ORGANISM Human respiratory syncytial virus A  
 Viruses; ssRNA viruses; ssRNA negative-strand viruses;  
 Mononegavirales; Pneumoviridae; Orthopneumovirus.

REFERENCE 1 (bases 1 to 651)

AUTHORS Thongpan,I., Mauleekoonphairoj,J., Vichiwattana,P., Korkong,S.,  
 Vongpunsawad,S. and Poovorawan,Y.

TITLE Molecular Characterization of Respiratory Syncytial Virus in  
 Thailand, 2012-2015

JOURNAL Unpublished

REFERENCE 2 (bases 1 to 651)

AUTHORS Thongpan,I., Mauleekoonphairoj,J., Vichiwattana,P., Korkong,S.,  
 Vongpunsawad,S. and Poovorawan,Y.

TITLE Direct Submission

JOURNAL Submitted (13-DEC-2016) Department of Pediatrics, Center of  
 Excellence in Clinical Virology, Faculty of Medicine, Chulalongkorn  
 University, Bangkok 10330, Thailand

COMMENT ##Assembly-Data-START##  
 Assembly Method :: DNASTAR-Lasergene v. 6  
 Sequencing Technology :: Sanger dideoxy sequencing  
 ##Assembly-Data-END##

FEATURES Location/Qualifiers

source 1..651  
 /organism="Human respiratory syncytial virus A"  
 /mol\_type="viral cRNA"  
 /isolate="TH-CU/C5158/2014"  
 /host="Homo sapiens"  
 /db\_xref="taxon:208893"  
 /country="Thailand"  
 /collection\_date="08-Oct-2014"  
 /note="group: A"

CDS <1..651  
 /note="G protein"  
 /codon\_start=1  
 /product="attachment glycoprotein"  
 /protein\_id="APY20364"  
 /translation="GTTLQSTTILASTTPSAESTPQSTTVKIINTTTTQILPSKPTTK  
 QRQNKPKQNKPNNDHFHFEVFNFPVPCISCSNNPTCWAICKRIPNKKPGKKTTKPTKKPT  
 LKTTKKDKPKPQTTKPKKEALTTKPTGKPTINTTKTNIRTTLLTSNTKGNPEHTSQKETL  
 HSTTSEGHLSPSQVHTTSGQEETLHSTTSESYLSPSQVYTTSEYLSQSLSSSNTTK"

ORIGIN

1 ggaactacat tacaatccac caccatacta gcttcaaca caccaagtgc tgagtcaacc  
 61 ccacaatcca caacagtcaa gatcataaac acaacaaca cccaaatatt acctagcaaa  
 121 cccaccacaa aacaacgcca aaataaacca caaaacaac ccaacaatga ttttcacttt  
 181 gaagtgttca atttgtacc ctgcagcata tgcagcaaca atccaacctg ctgggcatc  
 241 tgcaagagaa taccaacaaa aaaacctgga aagaaaacca ccaccaagcc cacaaaaaaa  
 301 ccaacctca agacaacaaa aaaagatccc aaacctcaaa ccacaaaacc aaaggaagca  
 361 ctcaaccca agcctacagg aaagccaacc atcaacacca ctaaacaaca catcagaact  
 421 aactgetca cctccaacac caaaggaat ccagaacaca caagtcaaaa ggaaccctc  
 481 cactcaacca cctccgaagg ccatctaagc ccatcacaag tccatacaac atccggtcaa

541 gaggaacc tccactcaac cacctccgaa agctatctaa gccatcaca agtctataca  
601 acatccgagt acctatcaca atctctatct tcatccaaca caacaaaatg a

//

LOCUS KY328024 651 bp cRNA linear VRL 12-DEC-2016  
DEFINITION Human respiratory syncytial virus A isolate TH-CU/C5079/2014  
attachment glycoprotein gene, partial cds.

ACCESSION KY328024

VERSION KY328024

KEYWORDS .

SOURCE Human respiratory syncytial virus A

ORGANISM Human respiratory syncytial virus A

Viruses; ssRNA viruses; ssRNA negative-strand viruses;  
Mononegavirales; Pneumoviridae; Orthopneumovirus.

REFERENCE 1 (bases 1 to 651)

AUTHORS Thongpan,I., Mauleekoonphairoj,J., Vichiwattana,P., Korkong,S.,  
Vongpunsawad,S. and Poovorawan,Y.

TITLE Molecular Characterization of Respiratory Syncytial Virus in  
Thailand, 2012-2015

JOURNAL Unpublished

REFERENCE 2 (bases 1 to 651)

AUTHORS Thongpan,I., Mauleekoonphairoj,J., Vichiwattana,P., Korkong,S.,  
Vongpunsawad,S. and Poovorawan,Y.

TITLE Direct Submission

JOURNAL Submitted (13-DEC-2016) Department of Pediatrics, Center of  
Excellence in Clinical Virology, Faculty of Medicine, Chulalongkorn  
University, Bangkok 10330, Thailand

COMMENT ##Assembly-Data-START##

Assembly Method :: DNASTAR-Lasergene v. 6  
Sequencing Technology :: Sanger dideoxy sequencing  
##Assembly-Data-END##

FEATURES Location/Qualifiers

source 1..651  
/organism="Human respiratory syncytial virus A"  
/mol\_type="viral cRNA"  
/isolate="TH-CU/C5079/2014"  
/host="Homo sapiens"  
/db\_xref="taxon:208893"  
/country="Thailand"  
/collection\_date="10-Sep-2014"  
/note="group: A"

CDS <1..651  
/note="G protein"  
/codon\_start=1  
/product="attachment glycoprotein"  
/protein\_id="APY20365"  
/translation="GTTLQSTTILASTTPSAESTPQSTTVKIINTTTTQILPSKPTTK  
QRQNKPNKPNDFHFEVFNFVPCISCSNNPTCWAICKRIPNKKPGKKTTKPTKKPT  
LKTTKKDPKPQTTKPKREALTTKPTGKPTINTTKTNIRTTLLTSNTKGNPEHTSQKETL  
HSTTSEGHLSQVHTTSGQEETLHSTTSESYLSPSQVYTTSEYLSQSLSSSNTTK"

ORIGIN

1 ggaactacat tacaatccac caccatacta gcttcaacaa caccaagtgc tgagtcaacc  
61 ccacaatcca caacagtcga gatcataaac acaacaacaa cccaaatatt acctagcaaa  
121 cccaccacaa aacaacgcca aaataaacca caaacaacac ccaacaatga ttttacttt  
181 gaagtgtca atttgtacc ctgcagcata tgcagcaaca atccaacctg ctgggccatc

241 tgcaagagaa taccaaacaa aaaacctgga aagaaaacca ccaccaagcc cacaaaaaaa  
301 ccaaccctca agacaaccaa aaaagatccc aaacctcaaa ccacaaaacc aaaggaagca  
361 ctcaacaac agcctacagg aaagccaacc atcaacacca ctaaaacaaa catcagaact  
421 aactgtctca cctccaacac caaaggaaat ccagaacaca caagtcaaaa ggaaaccctc  
481 cactcaacca cctccgaagg ccatctaage ccatcacaag tccatacaac atccggtcaa  
541 gaggaacc tccactcaac cacctcgaa agctatctaa gccatcaca agtctataca  
601 acatccgagt acctatcaca atctctatct tcatecaaca caacaaaatg a

//

LOCUS KY328025 651 bp cRNA linear VRL 12-DEC-2016  
DEFINITION Human respiratory syncytial virus A isolate TH-CU/B12797/2015  
attachment glycoprotein gene, partial cds.

ACCESSION KY328025

VERSION KY328025

KEYWORDS .

SOURCE Human respiratory syncytial virus A

ORGANISM Human respiratory syncytial virus A

Viruses; ssRNA viruses; ssRNA negative-strand viruses;  
Mononegavirales; Pneumoviridae; Orthopneumovirus.

REFERENCE 1 (bases 1 to 651)

AUTHORS Thongpan,I., Mauleekoonphairoj,J., Vichiwattana,P., Korkong,S.,  
Vongpunsawad,S. and Poovorawan,Y.

TITLE Molecular Characterization of Respiratory Syncytial Virus in  
Thailand, 2012-2015

JOURNAL Unpublished

REFERENCE 2 (bases 1 to 651)

AUTHORS Thongpan,I., Mauleekoonphairoj,J., Vichiwattana,P., Korkong,S.,  
Vongpunsawad,S. and Poovorawan,Y.

TITLE Direct Submission

JOURNAL Submitted (13-DEC-2016) Department of Pediatrics, Center of  
Excellence in Clinical Virology, Faculty of Medicine, Chulalongkorn  
University, Bangkok 10330, Thailand

COMMENT ##Assembly-Data-START##

Assembly Method :: DNASTAR-Lasergene v. 6  
Sequencing Technology :: Sanger dideoxy sequencing  
##Assembly-Data-END##

FEATURES Location/Qualifiers

source 1..651  
/organism="Human respiratory syncytial virus A"  
/mol\_type="viral cRNA"  
/isolate="TH-CU/B12797/2015"  
/host="Homo sapiens"  
/db\_xref="taxon:208893"  
/country="Thailand"  
/collection\_date="01-Sep-2015"  
/note="group: A"

CDS <1..651  
/note="G protein"  
/codon\_start=1  
/product="attachment glycoprotein"  
/protein\_id="APY20366"  
/translation="GTTSQSTTILASTTPSAESTPQSTTVKIKNTTTTQILPSKPTTK  
QRQNKPNKPNDFHFEVFNFPVPCISCSNNPTCWAICKRIPNKKPGKTTTKPTKKPT  
LKTTKKDPNPQTTKPKVLTTPKPTRKPTINTTKTNIRTTLLTSNTKGNPEHTSQEETL  
HSTTSKGYLSPSQVYTTSGQEETLHSTTSEGYLSPSQVYTTSEYLSQSLSSNTTK"



## ORIGIN

1 ggaactacat cacaatccac caccatacta gttcaaca caccaagtgc tgagtcaacc  
61 ccgcaatcca caacagtcaa gatcaaaaac acaacaaca cccaaatatt accagcaaa  
121 cccaccacaa aacaacgcca aaataaacca caaaacaac ccaacaatga ttttacttt  
181 gaagtgttca atttgtacc ctgcagcata tgcagcaaca atccaacctg ctgggccatc  
241 tgcaagagaa taccaacaa aaaacctgga aagaaaacca ccaccaagcc cacaaaaaaa  
301 ccaacctca aaacaacaa aaaagatccc aacctcaaa ccacaaaacc aaaggaagta  
361 ctactacca agctacaag aaagccaacc atcaacacca ctaaaacaaa catcagaact  
421 acactgetca cctccaacac caaaggaat ccagaacaca caagtcaaga ggaaaccctc  
481 cactcaacca cctcaaagg ctatctaagc ccattccaag ttatacaac atccgggtcaa  
541 gaggaacecc tccactcaac cacctcggaa ggctatctaa gcccatcaca agtctataca  
601 acatccgagt acctatcaca atctctatct tcattcaaca caacaaaatg a

//

LOCUS KY328026 651 bp cRNA linear VRL 12-DEC-2016  
DEFINITION Human respiratory syncytial virus A isolate TH-CU/C6247/2015  
attachment glycoprotein gene, partial cds.

ACCESSION KY328026

VERSION KY328026

KEYWORDS .

SOURCE Human respiratory syncytial virus A

ORGANISM Human respiratory syncytial virus A

Viruses; ssRNA viruses; ssRNA negative-strand viruses;  
Mononegavirales; Pneumoviridae; Orthopneumovirus.

REFERENCE 1 (bases 1 to 651)

AUTHORS Thongpan,I., Mauleekoonphairoj,J., Vichiwattana,P., Korkong,S.,  
Vongpunsawad,S. and Poovorawan,Y.

TITLE Molecular Characterization of Respiratory Syncytial Virus in  
Thailand, 2012-2015

JOURNAL Unpublished

REFERENCE 2 (bases 1 to 651)

AUTHORS Thongpan,I., Mauleekoonphairoj,J., Vichiwattana,P., Korkong,S.,  
Vongpunsawad,S. and Poovorawan,Y.

TITLE Direct Submission

JOURNAL Submitted (13-DEC-2016) Department of Pediatrics, Center of  
Excellence in Clinical Virology, Faculty of Medicine, Chulalongkorn  
University, Bangkok 10330, Thailand

COMMENT ##Assembly-Data-START##

Assembly Method :: DNASTAR-Lasergene v. 6  
Sequencing Technology :: Sanger dideoxy sequencing  
##Assembly-Data-END##

FEATURES Location/Qualifiers

source 1..651  
/organism="Human respiratory syncytial virus A"  
/mol\_type="viral cRNA"  
/isolate="TH-CU/C6247/2015"  
/host="Homo sapiens"  
/db\_xref="taxon:208893"  
/country="Thailand"  
/collection\_date="19-Nov-2015"  
/note="group: A"

CDS <1..651  
/note="G protein"  
/codon\_start=1  
/product="attachment glycoprotein"

/protein\_id="APY20367"  
/translation="GTTSQSTTILASTTPSAESTPQSTTVKIKNTTTTQILPSKPTTK  
QRQNKPNKPNDFHFEVFNFPVPCISCSNNPTCWAICKRIPNKKPGKKTTKPTKKPT  
LKTTKIDPNPQTTKPKPEVLTTKPTRKPTINTTKTNI RTLLTSNTKGNPEHTSQEETL  
HSTTSKGYLSPSQVYTTSGQEETLHSTTSEG YLSPSQVYTTSEYLSQSLSSSNTTK"

ORIGIN

1 ggaactacat cacaatccac caccatacta gttcaacaa caccaagtgc tgagteaacc  
61 ccgcaatcca caacagtaa gatcaaaaac acaacaacaa ccaaatatt accagcaaa  
121 cccaccacaa aacaacgcca aaataaacca caaacaacac ccaacaatga tttcactt  
181 gaagtgtca atttgtacc ctgcagcata tgcagcaaca atccaactg ctgggcatc  
241 tgcaagagaa taccaacaa aaaactgga aagaaaacca ccaccaagcc cacaaaaaaa  
301 ccaacctca aaacaacaa aatagatccc aacctcaaa ccacaaaacc aaaggaagta  
361 ctactacca agcctacaag aaagccaacc atcaacacca ctaaaacaaa catcagaact  
421 aactgctca cctcaacac caaaggaaat ccagaacaca caagtaaga ggaaacctc  
481 cactcaacca cctcaaagg ctatctaagc ccatccaag tctatacaac atccggtcaa  
541 gaggaacc tccactcaac cacctcgaa ggctatctaa gccatcaca agtctataca  
601 acatcagagt acctatcaca atctctatct tcatcaaca caacaaatg a

//

LOCUS KY328027 651 bp cRNA linear VRL 12-DEC-2016  
DEFINITION Human respiratory syncytial virus A isolate TH-CU/B12631/2015  
attachment glycoprotein gene, partial cds.

ACCESSION KY328027

VERSION KY328027

KEYWORDS .

SOURCE Human respiratory syncytial virus A

ORGANISM Human respiratory syncytial virus A

Viruses; ssRNA viruses; ssRNA negative-strand viruses;  
Mononegavirales; Pneumoviridae; Orthopneumovirus.

REFERENCE 1 (bases 1 to 651)

AUTHORS Thongpan,I., Mauleekoonphairoj,J., Vichiwattana,P., Korkong,S.,  
Vongpunsawad,S. and Poovorawan,Y.

TITLE Molecular Characterization of Respiratory Syncytial Virus in  
Thailand, 2012-2015

JOURNAL Unpublished

REFERENCE 2 (bases 1 to 651)

AUTHORS Thongpan,I., Mauleekoonphairoj,J., Vichiwattana,P., Korkong,S.,  
Vongpunsawad,S. and Poovorawan,Y.

TITLE Direct Submission

JOURNAL Submitted (13-DEC-2016) Department of Pediatrics, Center of  
Excellence in Clinical Virology, Faculty of Medicine, Chulalongkorn  
University, Bangkok 10330, Thailand

COMMENT ##Assembly-Data-START##

Assembly Method :: DNASTAR-Lasergene v. 6  
Sequencing Technology :: Sanger dideoxy sequencing  
##Assembly-Data-END##

FEATURES Location/Qualifiers

source 1..651  
/organism="Human respiratory syncytial virus A"  
/mol\_type="viral cRNA"  
/isolate="TH-CU/B12631/2015"  
/host="Homo sapiens"  
/db\_xref="taxon:208893"  
/country="Thailand"  
/collection\_date="14-Aug-2015"

CDS /note="group: A"  
<1..651  
/note="G protein"  
/codon\_start=1  
/product="attachment glycoprotein"  
/protein\_id="APY20368"  
/translation="GTTSQSTTILASTTPSAESTPQSTTVKIKNTTTTQILPSKPTTK  
QRQNKPNKPNDFHFEVFNFPVPCISCSNNPTCWAICKRIPNKKPGKKT TTKPTKKPT  
LKTTKKDPNPQTTPKPEVLTKPTRKPTINTTKTNIRTTLLTSNTKGNPEHTS QEETL  
HSTTSKGYLSPSQVYTTSGQEETLHSTTSEGYLSPSQVYTTSEYLSQSLSSSNTTK"

ORIGIN

1 ggaactacat cacaatccac caccatacta gcttcaacaa caccaagtgc tgagtcaacc  
61 ccgcaatcca caacagtcaa gatcaaaaac acaacaacaa cccaatatt accagcaaa  
121 cccaccacaa aacaacgcca aaataaacca caaaacaac ccaacaatga tttcacttt  
181 gaagtgtca atttgtacc ctgcagcata tgcagcaaca atccaacctg ctgggccatc  
241 tgcaagagaa taccaacaa aaaacctgga aagaaaacca ccaccaagcc cacaaaaaaa  
301 ccaacctca aaacaacaa aaaagatccc aacctcaaa ccacaaaacc aaaggaagta  
361 ctactacca agcctacaag aaagccaacc atcaacacca ctaaaacaaa catcagaact  
421 aactgetca cctcaacac caaaggaaat ccagaacaca caagtcaaga ggaaaccctc  
481 cactcaacca cctcaaagg ctatctaagc ccatcccaag tctatacaac atccgggtcaa  
541 gaggaacc tcaactcaac cacctccgaa ggctatctaa gccatcaca agtctatata  
601 acatccgagt acctatcaca atctctatct tcatccaaca caacaaatg a

//

LOCUS KY328028 651 bp cRNA linear VRL 12-DEC-2016  
DEFINITION Human respiratory syncytial virus A isolate TH-CU/C6221/2015  
attachment glycoprotein gene, partial cds.

ACCESSION KY328028

VERSION KY328028

KEYWORDS .

SOURCE Human respiratory syncytial virus A

ORGANISM Human respiratory syncytial virus A

Viruses; ssRNA viruses; ssRNA negative-strand viruses;  
Mononegavirales; Pneumoviridae; Orthopneumovirus.

REFERENCE 1 (bases 1 to 651)

AUTHORS Thongpan,I., Mauleekoonphairoj,J., Vichiwattana,P., Korkong,S.,  
Vongpunsawad,S. and Poovorawan,Y.

TITLE Molecular Characterization of Respiratory Syncytial Virus in  
Thailand, 2012-2015

JOURNAL Unpublished

REFERENCE 2 (bases 1 to 651)

AUTHORS Thongpan,I., Mauleekoonphairoj,J., Vichiwattana,P., Korkong,S.,  
Vongpunsawad,S. and Poovorawan,Y.

TITLE Direct Submission

JOURNAL Submitted (13-DEC-2016) Department of Pediatrics, Center of  
Excellence in Clinical Virology, Faculty of Medicine, Chulalongkorn  
University, Bangkok 10330, Thailand

COMMENT ##Assembly-Data-START##

Assembly Method :: DNASTAR-Lasergene v. 6  
Sequencing Technology :: Sanger dideoxy sequencing  
##Assembly-Data-END##

FEATURES Location/Qualifiers

source 1..651

/organism="Human respiratory syncytial virus A"  
/mol\_type="viral cRNA"

/isolate="TH-CU/C6221/2015"  
/host="Homo sapiens"  
/db\_xref="taxon:208893"  
/country="Thailand"  
/collection\_date="04-Nov-2015"  
/note="group: A"

CDS

<1..651  
/note="G protein"  
/codon\_start=1  
/product="attachment glycoprotein"  
/protein\_id="APY20369"  
/translation="GTTSQSTTILASTTPSAESTPQSTTVKIKNTTTTQILPSKPTTK  
QRQNKPNKPNDFHFEVFNFPVPCISCSNNPTCWAICKRIPNKKPGKKTTKPTKKPT  
LKTTKKDPNPQTTPKPEVLTKPTRKPTINTTKTNVITLLTSNTKGNPEHTSQEETL  
HSTTSKGYLSPSQVYTTSGQEETLHSTTSEGYLSPSQVYTTSEYLSQSLSSSNTTK"

ORIGIN

1 ggaactacat cacaatccac caccatacta gcttcaacaa caccaagtgc tgagtcaacc  
61 ccgcaatcca caacagtcaa gatcaaaaac acaacaacaa cccaaatatt acccagcaaa  
121 cccaccacaa aacaacgcca aaataaacca caaaacaaac ccaacaatga ttttacttt  
181 gaagtgttca atttgtacc ctgcagcata tgcagcaaca atccaacctg ctgggccatc  
241 tgcaagagaa taccaacaa aaaacctgga aagaaaacca ccaccaagcc cacaaaaaaa  
301 ccaacctca aaacaacaa aaaagatecc aacctcaaa ccacaaaacc aaaggaagta  
361 cteactacca agcctacaag aaagccaacc atcaacacca ctaaaacaaa cgtcataact  
421 aactgtctca cctccaacac caaaggaaat ccagaacaca caagtcaaga ggaaacctc  
481 cactcaacca cctcaaagg ctatctaagc ccatccaag ttatacaac atccgggtcaa  
541 gaggaaacc tccactcaac cacctcgaa ggctatctaa gccatcaca agctataca  
601 acatccgagt acctatcaca atctctatct tcatccaaca caacaaaatg a

//

LOCUS KY328029 651 bp cRNA linear VRL 12-DEC-2016  
DEFINITION Human respiratory syncytial virus A isolate TH-CU/B12259/2015  
attachment glycoprotein gene, partial cds.

ACCESSION KY328029

VERSION KY328029

KEYWORDS .

SOURCE Human respiratory syncytial virus A

ORGANISM Human respiratory syncytial virus A

Viruses; ssRNA viruses; ssRNA negative-strand viruses;  
Mononegavirales; Pneumoviridae; Orthopneumovirus.

REFERENCE 1 (bases 1 to 651)

AUTHORS Thongpan,I., Mauleekoonphairoj,J., Vichiwattana,P., Korkong,S.,  
Vongpunsawad,S. and Poovorawan,Y.

TITLE Molecular Characterization of Respiratory Syncytial Virus in  
Thailand, 2012-2015

JOURNAL Unpublished

REFERENCE 2 (bases 1 to 651)

AUTHORS Thongpan,I., Mauleekoonphairoj,J., Vichiwattana,P., Korkong,S.,  
Vongpunsawad,S. and Poovorawan,Y.

TITLE Direct Submission

JOURNAL Submitted (13-DEC-2016) Department of Pediatrics, Center of  
Excellence in Clinical Virology, Faculty of Medicine, Chulalongkorn  
University, Bangkok 10330, Thailand

COMMENT ##Assembly-Data-START##

Assembly Method :: DNASTAR-Lasergene v. 6  
Sequencing Technology :: Sanger dideoxy sequencing

##Assembly-Data-END##

FEATURES Location/Qualifiers

source 1..651  
/organism="Human respiratory syncytial virus A"  
/mol\_type="viral cRNA"  
/isolate="TH-CU/B12259/2015"  
/host="Homo sapiens"  
/db\_xref="taxon:208893"  
/country="Thailand"  
/collection\_date="15-Jul-2015"  
/note="group: A"

CDS <1..651  
/note="G protein"  
/codon\_start=1  
/product="attachment glycoprotein"  
/protein\_id="APY20370"  
/translation="GTTSQSTTILASTTPSAESTPQSTTVKIKNTTTTQILPSKPTTK  
QRQNKPNKPNDFHFEVFNFPVPCISCSNNPTCWAICKRIPNKKPGKKTTKPTKKPT  
LKTTKKDPNPQTTKPKVLTTPKPTRKPTINTTKTNIPTLLTSNTKGNPEHTSQEETL  
HSTTSKGYSPSQVHTTSGQEETLHSTTSEGYSQVYTTSEYLSQSLSSSNTTK"

ORIGIN

1 ggaactacat cacaatccac caccatacta gttcaacaa caccaagtgc tgagtcaacc  
61 ccgcaatcca caacagtcaa gatcaaaaac acaacaacaa cccaaatatt accagcaaa  
121 cccaccacaa aacaacgcca aaataaacca caaaacaaac ccaacaatga tttcacttt  
181 gaagtgttca atttgtacc ctgcagcata tgcagcaaca atccaacctg ctgggcatc  
241 tgcaaaaagaa taccaacaa aaaacctgga aagaaaacca ccaccaagcc cacaaaaaaa  
301 ccaacctca aaacaacaa aaaagatccc aacctcaaa ccacaaaacc aaaggaagta  
361 ctactacca agctacaag aaagccaacc atcaacacca ctaaaacaaa catcagaact  
421 acactgetca cctcaacac caaaggaat ccagaacaca caagtcaaga ggaaaccctc  
481 cactcaacca cctcaaagg ctatccaagc ccatccaag tccatacaac atccggtcaa  
541 gaggaacecc tcaactcaac cacctcggaa ggctatctaa gccatcaca agtctacaca  
601 acatccgagt acatcaca atctctatct tcatccaaca caacaaaatg a

//

LOCUS KY328030 651 bp cRNA linear VRL 12-DEC-2016  
DEFINITION Human respiratory syncytial virus A isolate TH-CU/C6233/2015  
attachment glycoprotein gene, partial cds.

ACCESSION KY328030

VERSION KY328030

KEYWORDS .

SOURCE Human respiratory syncytial virus A

ORGANISM Human respiratory syncytial virus A

Viruses; ssRNA viruses; ssRNA negative-strand viruses;  
Mononegavirales; Pneumoviridae; Orthopneumovirus.

REFERENCE 1 (bases 1 to 651)

AUTHORS Thongpan,I., Mauleekoonphairoj,J., Vichiwattana,P., Korkong,S.,  
Vongpunsawad,S. and Poovorawan,Y.

TITLE Molecular Characterization of Respiratory Syncytial Virus in  
Thailand, 2012-2015

JOURNAL Unpublished

REFERENCE 2 (bases 1 to 651)

AUTHORS Thongpan,I., Mauleekoonphairoj,J., Vichiwattana,P., Korkong,S.,  
Vongpunsawad,S. and Poovorawan,Y.

TITLE Direct Submission

JOURNAL Submitted (13-DEC-2016) Department of Pediatrics, Center of

Excellence in Clinical Virology, Faculty of Medicine, Chulalongkorn University, Bangkok 10330, Thailand

COMMENT ##Assembly-Data-START##

Assembly Method :: DNASTAR-Lasergene v. 6  
Sequencing Technology :: Sanger dideoxy sequencing  
##Assembly-Data-END##

FEATURES Location/Qualifiers

source 1..651  
/organism="Human respiratory syncytial virus A"  
/mol\_type="viral cRNA"  
/isolate="TH-CU/C6233/2015"  
/host="Homo sapiens"  
/db\_xref="taxon:208893"  
/country="Thailand"  
/collection\_date="04-Nov-2015"  
/note="group: A"

CDS <1..651  
/note="G protein"  
/codon\_start=1  
/product="attachment glycoprotein"  
/protein\_id="APY20371"  
/translation="GTTSQSTTILASTTPSAESTPQSTTVKIKNTTTTQILPSKPTTK  
QRQNKPNKPNDFHFEVFNFVPCISCSNNPTCWAICKRIPNKKPGKKTTKPTKKPT  
LKTTKKDPNPQTTKPEVLTKPTGKPTINTTKTNI RTLLTSNTKGNSEYTSQEETL  
HSTTYKGYLSPSQVYTTSGQEETLHSTTSEGYLSSSQVYTISEYLSQSPSSSNTTK"

ORIGIN

1 ggaactacat cacaatccac caccatacta gttcaacaa caccaagtgc tgagtaacc  
61 ccacaatcca caacagteaa gatcaaaaac acaacaacaa cccaaatatt acctagcaaa  
121 cccaccacaa aacaacgcca aaataaacca caaacaacac ccaacaatga tttcacttt  
181 gaagtgtca atttgtacc ctgcagcata tgcagcaaca atccaacctg ctgggccatc  
241 tgcaagagaa taccaacaa aaaacctgga aagaaaacca ccaccaagcc cacaaaaaaa  
301 ccaacctca aaacaaccaa aaaagatecc aatcctcaaa ccacaaaacc aaaggaagta  
361 ctactacca agcctacagg aaagccaacc atcaacacca ctaaacaacaa catcagaact  
421 aactgctca ctccaacac caaaggaaat tcagaatata caagtcaaga ggaaacctc  
481 cactcaacca ctacaaagg ctatctaagc ccatccaag tctatacaac atccggtcaa  
541 gaggaacc tccactcaac cacctcgaa ggctatctaa getcatcaca agtctataca  
601 atatccgagt acctatcaca atctcatct teatccaaca caacaaaatg a

//

LOCUS KY328031 651 bp cRNA linear VRL 12-DEC-2016  
DEFINITION Human respiratory syncytial virus A isolate TH-CU/C5087/2014  
attachment glycoprotein gene, partial cds.

ACCESSION KY328031

VERSION KY328031

KEYWORDS .

SOURCE Human respiratory syncytial virus A

ORGANISM Human respiratory syncytial virus A  
Viruses; ssRNA viruses; ssRNA negative-strand viruses;  
Mononegavirales; Pneumoviridae; Orthopneumovirus.

REFERENCE 1 (bases 1 to 651)

AUTHORS Thongpan,I., Mauleekoonphairoj,J., Vichiwattana,P., Korkong,S.,  
Vongpunawad,S. and Poovorawan,Y.

TITLE Molecular Characterization of Respiratory Syncytial Virus in  
Thailand, 2012-2015

JOURNAL Unpublished

REFERENCE 2 (bases 1 to 651)

AUTHORS Thongpan,I., Mauleekoonphairoj,J., Vichiwattana,P., Korkong,S.,  
Vongpunsawad,S. and Poovorawan,Y.

TITLE Direct Submission

JOURNAL Submitted (13-DEC-2016) Department of Pediatrics, Center of  
Excellence in Clinical Virology, Faculty of Medicine, Chulalongkorn  
University, Bangkok 10330, Thailand

COMMENT ##Assembly-Data-START##

Assembly Method :: DNASTAR-Lasergene v. 6  
Sequencing Technology :: Sanger dideoxy sequencing  
##Assembly-Data-END##

FEATURES Location/Qualifiers

source 1..651  
/organism="Human respiratory syncytial virus A"  
/mol\_type="viral cRNA"  
/isolate="TH-CU/C5087/2014"  
/host="Homo sapiens"  
/db\_xref="taxon:208893"  
/country="Thailand"  
/collection\_date="10-Sep-2014"  
/note="group: A"

CDS <1..651  
/note="G protein"  
/codon\_start=1  
/product="attachment glycoprotein"  
/protein\_id="APY20372"  
/translation="GTTSQSTTILASTTPSAESTPQSTTVKIKNTTTTQILPSKPTTK  
QRQNKPNKPNDFHFEVFNFPVPCISCSNNPTCWAICKRIPNKKPGKTTTKPTKKPT  
LKTTKKDPNPQTTKPKVLTTKPTGKPTINTTKTNIRTTLLTSNTKGNPEYTSQEETL  
HSTTYKGYSPSQVHTTSGQEETLHSTTSEGYSPSQVYTTSEYLSQSLSSSNTTK"

ORIGIN

1 ggaactacat cacaatccac caccatacta gttcaacaa caccaagtgc tgagtcaacc  
61 cacaatcca caacagtcga gatcaaaaa acaacaaca ccaaatatt acctagcaaa  
121 cccaccacaa aacaacgcca aataaacca caaaacaac ccaacaatga tttcacttt  
181 gaagtgttca atttgtacc ctgcagcata tgcagcaaca atccaacctg ctgggccatc  
241 tgcaagagaa taccaacaa aaaacctgga aagaaaacca ccaccaagcc cacaaaaaaa  
301 ccaacctca aaacaaccaa aaaagatccc aacctcaaa ccacaaaacc aaaggaagta  
361 ctactacca agctacagg aaagccaacc atcaacacca ctaaaacaaa catcagaact  
421 aactgetca cctcaacac caaaggaaat ccagaatata caagtcaaga ggaaacctc  
481 cactcaacca cctacaaagg ctatccaagc cateccaag tccatacaac atccggtaa  
541 gaggaaccc tccactcaac cacctccgaa ggctatccaa gccatcaca agtctataca  
601 acatccgagt acctatcaca atctctatct tcatccaaca caacaaaatg a

//

LOCUS KY328032 651 bp cRNA linear VRL 12-DEC-2016

DEFINITION Human respiratory syncytial virus A isolate TH-CU/C5091/2014  
attachment glycoprotein gene, partial cds.

ACCESSION KY328032

VERSION KY328032

KEYWORDS .

SOURCE Human respiratory syncytial virus A

ORGANISM Human respiratory syncytial virus A  
Viruses; ssRNA viruses; ssRNA negative-strand viruses;  
Mononegavirales; Pneumoviridae; Orthopneumovirus.

REFERENCE 1 (bases 1 to 651)

AUTHORS Thongpan,I., Mauleekoonphairoj,J., Vichiwattana,P., Korkong,S.,  
Vongpunsawad,S. and Poovorawan,Y.

TITLE Molecular Characterization of Respiratory Syncytial Virus in  
Thailand, 2012-2015

JOURNAL Unpublished

REFERENCE 2 (bases 1 to 651)

AUTHORS Thongpan,I., Mauleekoonphairoj,J., Vichiwattana,P., Korkong,S.,  
Vongpunsawad,S. and Poovorawan,Y.

TITLE Direct Submission

JOURNAL Submitted (13-DEC-2016) Department of Pediatrics, Center of  
Excellence in Clinical Virology, Faculty of Medicine, Chulalongkorn  
University, Bangkok 10330, Thailand

COMMENT ##Assembly-Data-START##

Assembly Method :: DNASTAR-Lasergene v. 6  
Sequencing Technology :: Sanger dideoxy sequencing  
##Assembly-Data-END##

FEATURES Location/Qualifiers

source 1..651  
/organism="Human respiratory syncytial virus A"  
/mol\_type="viral cRNA"  
/isolate="TH-CU/C5091/2014"  
/host="Homo sapiens"  
/db\_xref="taxon:208893"  
/country="Thailand"  
/collection\_date="10-Sep-2014"  
/note="group: A"

CDS <1..651  
/note="G protein"  
/codon\_start=1  
/product="attachment glycoprotein"  
/protein\_id="APY20373"  
/translation="GTTSQSTTILASTTPSAESTPQSTTVKIKNTTTTQILPSKPTTK  
QRQNKPNKPNDFHFEVFNFPVPCISCSNNPTCWAICKRIPNKKPGKKT TTKPTKKPT  
LKT TTKDPNPQT TTKPKEVL TTKPTGKPTINTTKTNI RTTLLTSNTKGNPEYTSQEETL  
HSTTYKGYSPSPVHTTSGQEETLHSTTSEGYSPSPQVYTTSEYLSQSLSSSNTTK"

ORIGIN

1 ggaactacat cacaatccac caccatacta gttcaacaa caccaagtgc tgagtcaacc  
61 ccacaatcca caacagtcaa gatcaaaaac acaacaacaa cccaaatatt acctagcaaa  
121 cccaccacaa aacaacgcca aaataaacca caaaacaaac ccaacaatga ttttcactt  
181 gaagtgttca atttgtacc ctgcagcata tgcagcaaca atccaacctg ctgggccatc  
241 tgcaagagaa taccaacaa aaaacctgga aagaaaacca ccaccaagcc cacaaaaaaa  
301 ccaacctca aaacaacaa aaaagatccc aacctcaaa ccacaaaacc aaaggaagta  
361 ctactacca agctacagg aaagccaacc atcaacacca ctaaaacaaa catcagaact  
421 aactgtctca cctcaacac caaaggaaat ccagaataca caagtcaaga ggaaacctc  
481 cactcaacca cctacaaagg ctatccaagc ccatccaag tccatacaac atccggtcaa  
541 gaggaaaccc tcaactcaac cacctcgaa ggctatcaa gccatcaca agtctataca  
601 acatccgagt acctatcaca atctctatct tcatccaaca caacaaaatg a

//

LOCUS KY328033 651 bp cRNA linear VRL 12-DEC-2016

DEFINITION Human respiratory syncytial virus A isolate ON1/TH-CU/B12563/2015  
attachment glycoprotein gene, partial cds.

ACCESSION KY328033

VERSION KY328033

KEYWORDS .



SOURCE Human respiratory syncytial virus A  
 ORGANISM Human respiratory syncytial virus A  
 Viruses; ssRNA viruses; ssRNA negative-strand viruses;  
 Mononegavirales; Pneumoviridae; Orthopneumovirus.

REFERENCE 1 (bases 1 to 651)  
 AUTHORS Thongpan,I., Mauleekoonphairoj,J., Vichiwattana,P., Korkong,S.,  
 Vongpunsawad,S. and Poovorawan,Y.  
 TITLE Molecular Characterization of Respiratory Syncytial Virus in  
 Thailand, 2012-2015  
 JOURNAL Unpublished

REFERENCE 2 (bases 1 to 651)  
 AUTHORS Thongpan,I., Mauleekoonphairoj,J., Vichiwattana,P., Korkong,S.,  
 Vongpunsawad,S. and Poovorawan,Y.  
 TITLE Direct Submission  
 JOURNAL Submitted (13-DEC-2016) Department of Pediatrics, Center of  
 Excellence in Clinical Virology, Faculty of Medicine, Chulalongkorn  
 University, Bangkok 10330, Thailand

COMMENT ##Assembly-Data-START##  
 Assembly Method :: DNASTAR-Lasergene v. 6  
 Sequencing Technology :: Sanger dideoxy sequencing  
 ##Assembly-Data-END##

FEATURES Location/Qualifiers  
 source 1..651  
 /organism="Human respiratory syncytial virus A"  
 /mol\_type="viral cRNA"  
 /isolate="ON1/TH-CU/B12563/2015"  
 /host="Homo sapiens"  
 /db\_xref="taxon:208893"  
 /country="Thailand"  
 /collection\_date="16-Aug-2015"  
 /note="group: A"

CDS <1..651  
 /note="G protein"  
 /codon\_start=1  
 /product="attachment glycoprotein"  
 /protein\_id="APY20374"  
 /translation="GTTSQSTTILASTTPSAESTPQSTTVKIKNTTTTQILPSKPTTK  
 QRQNKPKQNKPNDFHFEVFNFVPCISCSNNPTCWAICKRIPNKKPGKKTTKPTKKPT  
 LKTTKDKPKPQTTKPKVLTTKPTGKPTINTTKNIRTTLLTSNTKGNPEHTSQEETL  
 HSTTSEGYLSPSQVYTTSGQEETLHSTTSEGYLSPSQVYTTSEYLSQSLSSSNTTK"

ORIGIN  
 1 ggaactacat cacaatccac caccatacta gttcaacaa caccaagtgc tgagtcaacc  
 61 ccacaatcca caacagtcaa gatcaaaaac acaacaacaa ctcaaatatt acctagcaaa  
 121 cccaccacaa aacaacgcca aaataaacca caaaacaaac ccaacaatga tttcacttt  
 181 gaagtgttca atttgtacc ctgcagcata tgcagcaaca atccaacctg ctgggccatc  
 241 tgcaagagaa taccaacaa aaaacctgga aagaaaacca ccaccaagcc cacaaaaaaa  
 301 ccaacctca aaacaacaa aaaagatccc aaacctcaaa ccacaaaacc aaaggaagta  
 361 ctactacca agcctacagg aaagccaacc atcaacacca ctaaaacaaa catcagaact  
 421 acactgetca ctccaacac caaaggaat ccagaacaca caagtcaaga ggaaaccctc  
 481 cactcaacca cctccgaagg ctatctaagc ccatcacaag tctatacaac atccgggtaa  
 541 gaggaaaccc tccactcaac cacctcggaa ggctatctaa gcccatcaca agtctataca  
 601 acatccgagt acctatcaca atctctatct teatccaaca caacaaaatg a

//  
 LOCUS KY328034 651 bp cRNA linear VRL 12-DEC-2016

DEFINITION Human respiratory syncytial virus A isolate TH-CU/B12963/2015 attachment glycoprotein gene, partial cds.

ACCESSION KY328034

VERSION KY328034

KEYWORDS .

SOURCE Human respiratory syncytial virus A

ORGANISM Human respiratory syncytial virus A

Viruses; ssRNA viruses; ssRNA negative-strand viruses; Mononegavirales; Pneumoviridae; Orthopneumovirus.

REFERENCE 1 (bases 1 to 651)

AUTHORS Thongpan,I., Mauleekoonphairoj,J., Vichiwattana,P., Korkong,S., Vongpunsawad,S. and Poovorawan,Y.

TITLE Molecular Characterization of Respiratory Syncytial Virus in Thailand, 2012-2015

JOURNAL Unpublished

REFERENCE 2 (bases 1 to 651)

AUTHORS Thongpan,I., Mauleekoonphairoj,J., Vichiwattana,P., Korkong,S., Vongpunsawad,S. and Poovorawan,Y.

TITLE Direct Submission

JOURNAL Submitted (13-DEC-2016) Department of Pediatrics, Center of Excellence in Clinical Virology, Faculty of Medicine, Chulalongkorn University, Bangkok 10330, Thailand

COMMENT ##Assembly-Data-START##

Assembly Method :: DNASTAR-Lasergene v. 6  
Sequencing Technology :: Sanger dideoxy sequencing  
##Assembly-Data-END##

FEATURES Location/Qualifiers

source 1..651

/organism="Human respiratory syncytial virus A"  
/mol\_type="viral cRNA"  
/isolate="TH-CU/B12963/2015"  
/host="Homo sapiens"  
/db\_xref="taxon:208893"  
/country="Thailand"  
/collection\_date="19-Sep-2015"  
/note="group: A"

CDS <1..651

/note="G protein"  
/codon\_start=1  
/product="attachment glycoprotein"  
/protein\_id="APY20375"  
/translation="GTTSQSTTILASTTPSAESTPQSTTIKIKNTTTTQILPSKPTTK  
QRQNKPKQNKPNDFHFEVFNFPVPCISCSNNPTCWAICKRIPNKKPGKKTITTKPTKKQT  
LKTTKKDPKPKQTTKPKVLTTKPTGKPTINTTKTNVRTLITSNTKGNPEHTSQEETL  
HSTTSEGYPSPSQVYTTSGQEETLHSTTSEGYPSPQAHTTSEYPSQSLSSSNTAK"

ORIGIN

1 ggaactacat cacaatccac caccatacta gttcaacaa caccaagtgc tgagteaacc  
61 ccacaatcca caacaatcaa gatcaaaaac acaacaacaa cccaaatatt acctagcaaa  
121 cccaccacaa aacaacgcca aaataaacca caaacaacac ccaacaatga tttcacttt  
181 gaagtgttca attttgtacc ctgcagcata tgcagcaaca atccaacctg ctgggccatc  
241 tgcaagagaa taccaacaaa gaaacctgga aagaaaacca ccaccaagcc cacaaagaaa  
301 caaacctca agacaacaaa aaaagatecc aaacctcaaa ccacaaaacc aaaggaagta  
361 ctactacca agcctacagg aaagccaacc atcaacacca ctaaaacaaa cgtcagaact  
421 acactgatca cctccaacac caaaggaaat ccagaacaca caagtcaaga ggaaaccctc

481 cactcaacca cctccgaagg ctatccaage ccatcacaag tctacacaac atccggtaa  
541 gaggaaaccc tccactcaac cacctccgaa ggttatccaa gcccatcaca agcccataca  
601 acatccgagt accatcaca atctctatct teatccaaca cagcaaatg a

//

LOCUS KY328035 651 bp cRNA linear VRL 12-DEC-2016  
DEFINITION Human respiratory syncytial virus A isolate TH-CU/B12477/2015  
attachment glycoprotein gene, partial cds.

ACCESSION KY328035

VERSION KY328035

KEYWORDS .

SOURCE Human respiratory syncytial virus A

ORGANISM Human respiratory syncytial virus A

Viruses; ssRNA viruses; ssRNA negative-strand viruses;  
Mononegavirales; Pneumoviridae; Orthopneumovirus.

REFERENCE 1 (bases 1 to 651)

AUTHORS Thongpan,I., Mauleekoonphairoj,J., Vichiwattana,P., Korkong,S.,  
Vongpunsawad,S. and Poovorawan,Y.

TITLE Molecular Characterization of Respiratory Syncytial Virus in  
Thailand, 2012-2015

JOURNAL Unpublished

REFERENCE 2 (bases 1 to 651)

AUTHORS Thongpan,I., Mauleekoonphairoj,J., Vichiwattana,P., Korkong,S.,  
Vongpunsawad,S. and Poovorawan,Y.

TITLE Direct Submission

JOURNAL Submitted (13-DEC-2016) Department of Pediatrics, Center of  
Excellence in Clinical Virology, Faculty of Medicine, Chulalongkorn  
University, Bangkok 10330, Thailand

COMMENT ##Assembly-Data-START##

Assembly Method :: DNASTAR-Lasergene v. 6  
Sequencing Technology :: Sanger dideoxy sequencing  
##Assembly-Data-END##

FEATURES Location/Qualifiers

source 1..651  
/organism="Human respiratory syncytial virus A"  
/mol\_type="viral cRNA"  
/isolate="TH-CU/B12477/2015"  
/host="Homo sapiens"  
/db\_xref="taxon:208893"  
/country="Thailand"  
/collection\_date="04-Aug-2015"  
/note="group: A"

CDS <1..651  
/note="G protein"  
/codon\_start=1  
/product="attachment glycoprotein"  
/protein\_id="APY20376"  
/translation="GTTSQSTTILASTTPSAESTPQSTTVKIKNTTTTQILPSKPTTK  
QRQNKPNKPNDFHFEVFNFPVPCISCSNNPTCWAICKRIPNKKPGKKT TTKPTKKQT  
LKT TTKDPKPQT TTKPKEVL TTKPTGKPTINTTKTNIRTTLITSNTKGNPEHTSQEETL  
HSTTSEGYPSPSQVYTTSGQEETLHSTTSEGYPSPSQAHTTSEYPSQSLSSNTAK"

ORIGIN

1 ggaactacat cacaatccac caccatacta gcttcaacaa caccaagtgc tgagtcaacc  
61 ccacaatcca caacagtcaa gatcaaaaac acaacaacaa cccaaatatt acctagcaaa  
121 cccaccacaa aacaacgcca aaataaacca caaacaacac ccaacaatga tttcacttt

181 gaagtgttca atttgtacc ctgcagcata tgcagcaaca atccaacctg ctgggcatc  
241 tgcaagagaa taccaacaa gaaacctgga aagaaaacca ccaccaagcc cacaaagaaa  
301 caaacctca agacaaccaa aaaagatccc aaacctcaaa ccacaaaacc aaaggaagta  
361 ctactacca agcctacagg aaagccaacc atcaacacca ctaaaacaaa catcagaact  
421 aactgatca cctccaacac caaaggaaat ccagaacaca caagtcaaga ggaaaccctc  
481 cactcaacca cctccgaagg ctatccaagc ccatcacaag tctacacaac atccggtaa  
541 gaggaacecc tccactcaac cacctcggaa gggtatcaa gcccatcaca agccatata  
601 acatccgagt acctatcaca atctctatct tcatccaaca cagcaaatg a

//

LOCUS KY328036 651 bp cRNA linear VRL 12-DEC-2016  
DEFINITION Human respiratory syncytial virus A isolate TH-CU/B12696/2015  
attachment glycoprotein gene, partial cds.

ACCESSION KY328036

VERSION KY328036

KEYWORDS .

SOURCE Human respiratory syncytial virus A

ORGANISM Human respiratory syncytial virus A

Viruses; ssRNA viruses; ssRNA negative-strand viruses;  
Mononegavirales; Pneumoviridae; Orthopneumovirus.

REFERENCE 1 (bases 1 to 651)

AUTHORS Thongpan,I., Mauleekoonphairoj,J., Vichiwattana,P., Korkong,S.,  
Vongpunsawad,S. and Poovorawan,Y.

TITLE Molecular Characterization of Respiratory Syncytial Virus in  
Thailand, 2012-2015

JOURNAL Unpublished

REFERENCE 2 (bases 1 to 651)

AUTHORS Thongpan,I., Mauleekoonphairoj,J., Vichiwattana,P., Korkong,S.,  
Vongpunsawad,S. and Poovorawan,Y.

TITLE Direct Submission

JOURNAL Submitted (13-DEC-2016) Department of Pediatrics, Center of  
Excellence in Clinical Virology, Faculty of Medicine, Chulalongkorn  
University, Bangkok 10330, Thailand

COMMENT ##Assembly-Data-START##

Assembly Method :: DNASTAR-Lasergene v. 6  
Sequencing Technology :: Sanger dideoxy sequencing  
##Assembly-Data-END##

FEATURES Location/Qualifiers

source 1..651  
/organism="Human respiratory syncytial virus A"  
/mol\_type="viral cRNA"  
/isolate="TH-CU/B12696/2015"  
/host="Homo sapiens"  
/db\_xref="taxon:208893"  
/country="Thailand"  
/collection\_date="22-Aug-2015"  
/note="group: A"

CDS <1..651  
/note="G protein"  
/codon\_start=1  
/product="attachment glycoprotein"  
/protein\_id="APY20377"  
/translation="GTTSQSTTILASTTPSAESTPQSTTVKIKNTTTTQILPSKPTTK  
QRQNKPNKPNDFHFEVFNFPVPCISCSNNPTCWAICKRIPNKKPGKKTTKPTKKQT  
LKTTKKDPKPQTTPKPEVLTKPTGKPTINTTKTNIRTTLLTSNTKGNPEHTSQEETL

HSTTSEGYSPSPSQVYTTSGQEETLHSTTSEGYSPSPAHTTSEYPSQSLSSSNTAK"

ORIGIN

1 ggaactacat cacaatccac caccatacta gcttcaacaa caccaagtgc tgagtaacc  
61 ccacaatcca caacagtcga gatcaaaaac acaacaacaa cccaaatatt acctagcaaa  
121 cccaccacaa aacaacgcca aaataaacca caaaacaac ccaacaatga ttttacttt  
181 gaagtgtca atttgtacc ctgcagcata tgcagcaaca atccaacctg ctgggccatc  
241 tgcaagagaa taccaaacaa gaaacctgga aagaaaacca ccaccaagcc cacaaagaaa  
301 caaacctca agacaaccaa aaaagatecc aaacctcaaa ccacaaaacc aaaggaagta  
361 ctactacca agcctacagg aaagccaacc atcaacacca ctaaacaacaa catcagaact  
421 aactgctca ctccaacac caaaggaaat ccagaacaca caagtcaaga ggaaaccctc  
481 cactcaacca cctcgaagg ctatccaagc ccatcacaag tctacacaac atccgggtcaa  
541 gaggaacc tccactcaac cacctcgaag ggttatccaa gcccatcaca agccatata  
601 acatcagat accatcaca atctctatct tcatccaaca cagcaaatg a

//

LOCUS KY328037 651 bp cRNA linear VRL 12-DEC-2016  
DEFINITION Human respiratory syncytial virus A isolate TH-CU/B10980/2014  
attachment glycoprotein gene, partial cds.

ACCESSION KY328037

VERSION KY328037

KEYWORDS .

SOURCE Human respiratory syncytial virus A

ORGANISM Human respiratory syncytial virus A

Viruses; ssRNA viruses; ssRNA negative-strand viruses;  
Mononegavirales; Pneumoviridae; Orthopneumovirus.

REFERENCE 1 (bases 1 to 651)

AUTHORS Thongpan,I., Mauleekoonphairoj,J., Vichiwattana,P., Korkong,S.,  
Vongpunsawad,S. and Poovorawan,Y.

TITLE Molecular Characterization of Respiratory Syncytial Virus in  
Thailand, 2012-2015

JOURNAL Unpublished

REFERENCE 2 (bases 1 to 651)

AUTHORS Thongpan,I., Mauleekoonphairoj,J., Vichiwattana,P., Korkong,S.,  
Vongpunsawad,S. and Poovorawan,Y.

TITLE Direct Submission

JOURNAL Submitted (13-DEC-2016) Department of Pediatrics, Center of  
Excellence in Clinical Virology, Faculty of Medicine, Chulalongkorn  
University, Bangkok 10330, Thailand

COMMENT ##Assembly-Data-START##

Assembly Method :: DNASTAR-Lasergene v. 6  
Sequencing Technology :: Sanger dideoxy sequencing  
##Assembly-Data-END##

FEATURES Location/Qualifiers

source 1..651  
/organism="Human respiratory syncytial virus A"  
/mol\_type="viral cRNA"  
/isolate="TH-CU/B10980/2014"  
/host="Homo sapiens"  
/db\_xref="taxon:208893"  
/country="Thailand"  
/collection\_date="11-Sep-2014"  
/note="group: A"  
CDS <1..651  
/note="G protein"  
/codon\_start=1

```
/product="attachment glycoprotein"  
/protein_id="APY20378"  
/translation="GTTSQSTTILASTTLSAESTPQSTTVKIKNTTTTQILPSKPTTK  
QRQNKPNKPNDFHFEVFNVPSCSICNNPTCWAICKRIPNKKPGKTTTKPTKKPT  
LKTTKDKPKPQTTKPKKVLTTKPTGKPTINTTKTNI RTLLTSNTKGNPEHTSQEETL  
HSTTSEGYPSPSQVYTTSGQEETLHSTTSEGYPSPSQVHTTSEYLSQSLSSSNTTK"
```

ORIGIN

```
1 ggaactacat cacaatccac caccatacta gcttcaacaa cattaagtgc tgagtcaacc  
61 ccacaatcca caacagtcga gatcaaaaaa acaacaacaa ccaaatatt acctagcaaa  
121 cccaccacaa aacaacgcca aaataaacca caaaacaaac ccaacaatga tttcacttt  
181 gaagtgttca atttgtacc ctgcagcata tgcagcaaca atccaacctg ctgggccatc  
241 tgcaagagaa taccaaacaa aaaacctgga aagaaaacca ccaccaagcc cacaaaaaaa  
301 ccaacctca agacaaccaa aaaagatccc aaacctcaaa ccacaaaacc aaagaaagta  
361 ctactacca agcctacagg aaagccaacc atcaacacca ctaaaacaaa catcagaact  
421 aactgetca cctcaacac caaaggaaat ccagaacaca caagtaaga ggaaaccctc  
481 cactcaacca cctcgaagg ctatccaage ccatcacaag tctatacaac atccggtaa  
541 gaggaacc tccactcaac cacctccgaa ggctatccaa gccatcaca agtccataca  
601 acatccgagt acctatcaca atctctatct tcatccaaca caacaaaatg a
```

//

LOCUS KY328038 651 bp cRNA linear VRL 12-DEC-2016  
DEFINITION Human respiratory syncytial virus A isolate TH-CU/CB122/2013  
attachment glycoprotein gene, partial cds.

ACCESSION KY328038

VERSION KY328038

KEYWORDS .

SOURCE Human respiratory syncytial virus A

ORGANISM Human respiratory syncytial virus A

Viruses; ssRNA viruses; ssRNA negative-strand viruses;  
Mononegavirales; Pneumoviridae; Orthopneumovirus.

REFERENCE 1 (bases 1 to 651)

AUTHORS Thongpan,I., Mauleekoonphairoj,J., Vichiwattana,P., Korkong,S.,  
Vongpunsawad,S. and Poovorawan,Y.

TITLE Molecular Characterization of Respiratory Syncytial Virus in  
Thailand, 2012-2015

JOURNAL Unpublished

REFERENCE 2 (bases 1 to 651)

AUTHORS Thongpan,I., Mauleekoonphairoj,J., Vichiwattana,P., Korkong,S.,  
Vongpunsawad,S. and Poovorawan,Y.

TITLE Direct Submission

JOURNAL Submitted (13-DEC-2016) Department of Pediatrics, Center of  
Excellence in Clinical Virology, Faculty of Medicine, Chulalongkorn  
University, Bangkok 10330, Thailand

COMMENT ##Assembly-Data-START##

Assembly Method :: DNASTAR-Lasergene v. 6  
Sequencing Technology :: Sanger dideoxy sequencing  
##Assembly-Data-END##

FEATURES Location/Qualifiers

source 1..651

```
/organism="Human respiratory syncytial virus A"  
/mol_type="viral cRNA"  
/isolate="TH-CU/CB122/2013"  
/host="Homo sapiens"  
/db_xref="taxon:208893"  
/country="Thailand"
```

/collection\_date="01-Nov-2013"  
/note="group: A"  
CDS <1..651  
/note="G protein"  
/codon\_start=1  
/product="attachment glycoprotein"  
/protein\_id="APY20379"  
/translation="GTTSQSTTILASTTSSAESTPQSTTVKIKNTTTTQILPSKPTTK  
QRQNKPNKPNDFHFEVFNFPVPCISCSNNPTCWAICKRIPNKKPGKKT TTKPTKKPT  
LKT TTKDKPKPQT TTKPKKVL TTKPTGKPTINTTKT NIRTLLTSNTKGNPEHTSQEETL  
HSTTSEGYSPSPVYTTSGQEETLHSTTSEGYSPSPVHTTSEYLSQSLSSSNTTK"

ORIGIN

1 ggaactacat cacaatccac caccatacta gcttcaacaa catcaagtgc tgagtcaacc  
61 ccacaatcca caacagtcaa gatcaaaaac acaacaacaa cccaaatatt acctagcaaa  
121 cccaccacaa aacaacgcca aaataaacca caaaacaaac ccaacaatga ttttacttt  
181 gaagtgttca atttgtacc ctgcagcata tgcagcaaca atccaacctg ctgggccatc  
241 tgcaagagaa taccaacaa aaaacctgga aagaaaacca ccaccaagcc cacaaaaaaa  
301 ccaacctca agacaacaa aaaagatccc aaacctcaa ccacaaaacc aaagaaagta  
361 ctactacca agcctacagg aaagccaacc atcaacacca ctaaaacaaa catcagaact  
421 aactgtctca cctccaacac caaaggaaat ccagaacaca caagtcaaga ggaaacctc  
481 cactcaacca cctccgaagg ctatccaage ccatcacaag tctatacaac atccggtcaa  
541 gaggaacc tcaactcaac cacctcgaa ggctatcaa gccatcaca agtccataca  
601 acatccgagt acctatcaca atctctatct tcatccaaca caacaaaatg a

//

LOCUS KY328039 651 bp cRNA linear VRL 12-DEC-2016  
DEFINITION Human respiratory syncytial virus A isolate TH-CU/CB119/2013  
attachment glycoprotein gene, partial cds.

ACCESSION KY328039

VERSION KY328039

KEYWORDS .

SOURCE Human respiratory syncytial virus A

ORGANISM Human respiratory syncytial virus A

Viruses; ssRNA viruses; ssRNA negative-strand viruses;  
Mononegavirales; Pneumoviridae; Orthopneumovirus.

REFERENCE 1 (bases 1 to 651)

AUTHORS Thongpan,I., Mauleekoonphairoj,J., Vichiwattana,P., Korkong,S.,  
Vongpunsawad,S. and Poovorawan,Y.

TITLE Molecular Characterization of Respiratory Syncytial Virus in  
Thailand, 2012-2015

JOURNAL Unpublished

REFERENCE 2 (bases 1 to 651)

AUTHORS Thongpan,I., Mauleekoonphairoj,J., Vichiwattana,P., Korkong,S.,  
Vongpunsawad,S. and Poovorawan,Y.

TITLE Direct Submission

JOURNAL Submitted (13-DEC-2016) Department of Pediatrics, Center of  
Excellence in Clinical Virology, Faculty of Medicine, Chulalongkorn  
University, Bangkok 10330, Thailand

COMMENT ##Assembly-Data-START##

Assembly Method :: DNASTAR-Lasergene v. 6  
Sequencing Technology :: Sanger dideoxy sequencing  
##Assembly-Data-END##

FEATURES Location/Qualifiers

source 1..651

/organism="Human respiratory syncytial virus A"

/mol\_type="viral cRNA"  
/isolate="TH-CU/CB119/2013"  
/host="Homo sapiens"  
/db\_xref="taxon:208893"  
/country="Thailand"  
/collection\_date="01-Nov-2013"  
/note="group: A"

CDS <1..651  
/note="G protein"  
/codon\_start=1  
/product="attachment glycoprotein"  
/protein\_id="APY20380"  
/translation="GTTSQSTTILASTTSSAESTPQSTTVKIKNTTTTQILPSKPTTK  
QRQNKPKQNKPNDFHFEVFNFVPCISCSNNPTCWAICKRIPNKKPGKKTTKPTKKPT  
LKTTKKDPKPQTTKPKKVLTTKPTGKPTINTTKTNI RTLLTSNTKGNPEHTSQEETL  
HSTTSEGYPSPSQVYTTSGQEETLHSTTSEGYPSPSQVHTTSEYLSQSLSSSNTTK"

ORIGIN

1 ggaactacat cacaatccac caccatacta gcttcaaca catcaagtgc tgagtcaacc  
61 ccacaatcca caacagtcaa gatcaaaaac acaacaaca cccaaatatt acctagcaaa  
121 cccaccacaa aacaacgcca aataaaca caaaacaac ccaacaatga ttttacttt  
181 gaagtgttca atttgtacc ctgcagcata tgcagcaaca atccaacctg ctgggccaatc  
241 tgcaagagaa taccaacaa aaaacctgga aagaaaacca ccaccaagcc cacaaaaaaa  
301 ccaacctca agacaacaa aaaagatccc aaacctcaa ccacaaaacc aaagaaagta  
361 ctactacca agcctacagg aaagccaacc atcaacacca ctaaaacaaa catcagaact  
421 acactgetca cctccaacac caaaggaat ccagaacaca caagtcaaga ggaaaccctc  
481 cactcaacca cctccgaagg ctatccaagc ccatcacaag tctatacaac atccggtaa  
541 gaggaacecc tccactcaac cacctcgaag ggctatcaa gcccataca agtccataca  
601 acatccgagt acctatcaca atctctatct tcatccaaca caacaaaatg a

//

LOCUS KY328040 651 bp cRNA linear VRL 12-DEC-2016  
DEFINITION Human respiratory syncytial virus A isolate TH-CU/CB124/2013  
attachment glycoprotein gene, partial cds.

ACCESSION KY328040

VERSION KY328040

KEYWORDS .

SOURCE Human respiratory syncytial virus A

ORGANISM Human respiratory syncytial virus A

Viruses; ssRNA viruses; ssRNA negative-strand viruses;  
Mononegavirales; Pneumoviridae; Orthopneumovirus.

REFERENCE 1 (bases 1 to 651)

AUTHORS Thongpan,I., Mauleekoonphairoj,J., Vichiwattana,P., Korkong,S.,  
Vongpunsawad,S. and Poovorawan,Y.

TITLE Molecular Characterization of Respiratory Syncytial Virus in  
Thailand, 2012-2015

JOURNAL Unpublished

REFERENCE 2 (bases 1 to 651)

AUTHORS Thongpan,I., Mauleekoonphairoj,J., Vichiwattana,P., Korkong,S.,  
Vongpunsawad,S. and Poovorawan,Y.

TITLE Direct Submission

JOURNAL Submitted (13-DEC-2016) Department of Pediatrics, Center of  
Excellence in Clinical Virology, Faculty of Medicine, Chulalongkorn  
University, Bangkok 10330, Thailand

COMMENT ##Assembly-Data-START##

Assembly Method :: DNASTAR-Lasergene v. 6



Sequencing Technology :: Sanger dideoxy sequencing

##Assembly-Data-END##

FEATURES Location/Qualifiers

source 1..651  
/organism="Human respiratory syncytial virus A"  
/mol\_type="viral cRNA"  
/isolate="TH-CU/CB124/2013"  
/host="Homo sapiens"  
/db\_xref="taxon:208893"  
/country="Thailand"  
/collection\_date="01-Nov-2013"  
/note="group: A"

CDS <1..651  
/note="G protein"  
/codon\_start=1  
/product="attachment glycoprotein"  
/protein\_id="APY20381"  
/translation="GTTSQSTTILASTTSSAESTPQSTTVKIKNTTTTQILPSKPTTK  
QRQNKPNKPNDFHFEVFNFPVPCISCSNNPTCWAICKRIPNKKPGKKTTKPTKKPT  
LKTTKKDPKPKQTTKPKKVLTTKPTGKPTINTTKTNI RTTLLTSNTKGNPEHTSQEETL  
HSTTSEGYPSPSQVYTTSGQEETLHSTTSEGYPSPSQVHTTSEYLSQSLSSSNTTK"

ORIGIN

1 ggaactacat cacaatccac caccatacta gttcaacaa catcaagtgc tgagtcaacc  
61 ccacaatcca caacagctca gatcaaaaac acaacaacaa cccaaatatt acctagcaaa  
121 cccaccacaa aacaagccca aaataaacca caaacaacac ccaacaatga tttcacttt  
181 gaagtgtca atttgtacc ctgcagcata tgcagcaaca atccaacctg ctgggccatc  
241 tgcaagagaa taccaacaaa aaaacctgga aagaaaacca ccaccaagcc cacaaaaaaaa  
301 ccaacctca agacaacaaa aaaagatecc aaacctcaaa ccacaaaacc aaagaaagta  
361 ctactacca agcctacagg aaagccaacc atcaacacca ctaaaacaaa catcagaact  
421 aactgctca cctccaacac caaaggaaat ccagaacaca caagtcaaga ggaaaccctc  
481 cactcaacca cctcgaagg ctatccaagc ccatcacaag tctatacaac atccgggtcaa  
541 gaggaacc tccactcaac cacctcgaag ggctatccaa gccatcaca agtccataca  
601 acatccgagt acctatcaca atctctatct tcatccaaca caacaaaatg a

//

LOCUS KY328041 651 bp cRNA linear VRL 12-DEC-2016  
DEFINITION Human respiratory syncytial virus A isolate TH-CU/CB135/2013  
attachment glycoprotein gene, partial cds.

ACCESSION KY328041

VERSION KY328041

KEYWORDS .

SOURCE Human respiratory syncytial virus A

ORGANISM Human respiratory syncytial virus A  
Viruses; ssRNA viruses; ssRNA negative-strand viruses;  
Mononegavirales; Pneumoviridae; Orthopneumovirus.

REFERENCE 1 (bases 1 to 651)

AUTHORS Thongpan,I., Mauleekoonphairoj,J., Vichiwattana,P., Korkong,S.,  
Vongpunsawad,S. and Poovorawan,Y.

TITLE Molecular Characterization of Respiratory Syncytial Virus in  
Thailand, 2012-2015

JOURNAL Unpublished

REFERENCE 2 (bases 1 to 651)

AUTHORS Thongpan,I., Mauleekoonphairoj,J., Vichiwattana,P., Korkong,S.,  
Vongpunsawad,S. and Poovorawan,Y.

TITLE Direct Submission

JOURNAL Submitted (13-DEC-2016) Department of Pediatrics, Center of Excellence in Clinical Virology, Faculty of Medicine, Chulalongkorn University, Bangkok 10330, Thailand

COMMENT ##Assembly-Data-START##

Assembly Method :: DNASTAR-Lasergene v. 6  
Sequencing Technology :: Sanger dideoxy sequencing  
##Assembly-Data-END##

FEATURES Location/Qualifiers

source 1..651  
/organism="Human respiratory syncytial virus A"  
/mol\_type="viral cRNA"  
/isolate="TH-CU/CB135/2013"  
/host="Homo sapiens"  
/db\_xref="taxon:208893"  
/country="Thailand"  
/collection\_date="01-Nov-2013"  
/note="group: A"

CDS <1..651  
/note="G protein"  
/codon\_start=1  
/product="attachment glycoprotein"  
/protein\_id="APY20382"  
/translation="GTTSQSTTILASTTSSAESTPQSTTVKIKNTTTTQILPSKPTTK  
QRQNKPNKPNDFHFEVFNFPVPCISCSNNPTCWAICKRIPNKKPGKKT TTKPTKKPT  
LKTTKKDPKPQTTKPKKVLTTKPTGKPTINTTKTNIRTTLLTSNTKGNPEHTSQEETL  
HSTTSEGYPSPSQVYTTSGQEETLHSTTSEGYPSPSQVHTTSEYLSQSLSSSNTTK"

ORIGIN

1 ggaactacat cacaatccac caccatacta gcttcaacaa catcaagtgc tgagtcaacc  
61 ccacaatcca caacagtcaa gatcaaaaac acaacaacaa ccaaatatt acctagcaaa  
121 cccaccacaa aacaacgcca aaataaacca caaaacaac ccaacaatga tttcacttt  
181 gaagtggtca atttgtacc ctgcagcata tgcagcaaca atccaacctg ctgggccatc  
241 tgcaagagaa taccaaacaa aaaacctgga aagaaaacca ccaccaagcc cacaaaaaaa  
301 ccaacctca agacaacaa aaaagatccc aaacctcaaa ccacaaaacc aaagaaagta  
361 ctactacca agctacagg aaagccaacc atcaacacca ctaaaacaaa catcagaact  
421 aactgetca cctcaacac caaaggaaat ccagaacaca caagtaaga ggaaaccctc  
481 cactcaacca cctcgaagg ctatccaage ccatcacaag tctatacaac atccggctca  
541 gaggaacc tcaactcaac cacctcgaag ggctatcaa gccatcaca agtccataca  
601 acatccgagt acctatcaca atctctatct tcatccaaca caacaaatg a

//

LOCUS KY328042 651 bp cRNA linear VRL 12-DEC-2016  
DEFINITION Human respiratory syncytial virus A isolate TH-CU/CB164/2014  
attachment glycoprotein gene, partial cds.

ACCESSION KY328042

VERSION KY328042

KEYWORDS .

SOURCE Human respiratory syncytial virus A

ORGANISM Human respiratory syncytial virus A  
Viruses; ssRNA viruses; ssRNA negative-strand viruses;  
Mononegavirales; Pneumoviridae; Orthopneumovirus.

REFERENCE 1 (bases 1 to 651)

AUTHORS Thongpan,I., Mauleekoonphairoj,J., Vichiwattana,P., Korkong,S.,  
Vongpunsawad,S. and Poovorawan,Y.

TITLE Molecular Characterization of Respiratory Syncytial Virus in  
Thailand, 2012-2015

JOURNAL Unpublished  
REFERENCE 2 (bases 1 to 651)  
AUTHORS Thongpan,I., Mauleekoonphairoj,J., Vichiwattana,P., Korkong,S.,  
Vongpunsawad,S. and Poovorawan,Y.  
TITLE Direct Submission  
JOURNAL Submitted (13-DEC-2016) Department of Pediatrics, Center of  
Excellence in Clinical Virology, Faculty of Medicine, Chulalongkorn  
University, Bangkok 10330, Thailand  
COMMENT ##Assembly-Data-START##  
Assembly Method :: DNASTAR-Lasergene v. 6  
Sequencing Technology :: Sanger dideoxy sequencing  
##Assembly-Data-END##  
FEATURES Location/Qualifiers  
source 1..651  
/organism="Human respiratory syncytial virus A"  
/mol\_type="viral cRNA"  
/isolate="TH-CU/CB164/2014"  
/host="Homo sapiens"  
/db\_xref="taxon:208893"  
/country="Thailand"  
/collection\_date="01-Jan-2014"  
/note="group: A"  
CDS <1..651  
/note="G protein"  
/codon\_start=1  
/product="attachment glycoprotein"  
/protein\_id="APY20383"  
/translation="GTTSQSTTILASTTSSAESTPQSTTVKIKNTTTTQILPSKPTTK  
QRQNKPKPNNDHFVFNFPVPCISCSNNPTCWAICKRIPNKKPGKKTTKPTKKPT  
LKTTKKDPKPQTTKPKKVLTTKPTGKPTINTTKTNI RTLLTSNTKGNPEHTSQEETL  
HSTTSEGYPSPSQVYTTSGQEETLHSTTSEGYPSPSQVHTTSEYLSQSLSSSNTTK"  
ORIGIN  
1 ggaactacat cacaatccac caccatacta gcttcaacaa catcaagtgc tgagtcaacc  
61 ccacaatcca caacagtcaa gatcaaaaac acaacaacaa cccaatatt acctagcaaa  
121 cccaccacaa aacaacgcca aataaaacca caaaacaaac ccaacaatga ttttacttt  
181 gaagtgttca atttgtacc ctgcagcata tgcagcaaca atccaacctg ctgggccatc  
241 tgcaagagaa taccaacaa aaaacctgga aagaaaacca ccaccaagcc cacaaaaaaa  
301 ccaacctca agacaacaa aaaagatecc aaacctcaaa ccacaaaacc aaagaaagta  
361 ctcactacca agcctacagg aaagccaacc atcaacacca ctaaaacaaa catcagaact  
421 aactgtctca cctccaacac caaaggaaat ccagaacaca caagtcaaga ggaaacctc  
481 cactcaacca cctccgaagg ctatccaage ccatcacaag tctatacaac atccggtcaa  
541 gaggaaacc tcaactcaac cacctcgaa ggctatcaa gccatcaca agtccataca  
601 acatccgagt acctatcaca atctctatct tcatccaaca caacaaaatg a  
//  
LOCUS KY328043 651 bp cRNA linear VRL 12-DEC-2016  
DEFINITION Human respiratory syncytial virus A isolate TH-CU/CB49/2013  
attachment glycoprotein gene, partial cds.  
ACCESSION KY328043  
VERSION KY328043  
KEYWORDS .  
SOURCE Human respiratory syncytial virus A  
ORGANISM Human respiratory syncytial virus A  
Viruses; ssRNA viruses; ssRNA negative-strand viruses;  
Mononegavirales; Pneumoviridae; Orthopneumovirus.

REFERENCE 1 (bases 1 to 651)

AUTHORS Thongpan,I., Mauleekoonphairoj,J., Vichiwattana,P., Korkong,S.,  
Vongpunsawad,S. and Poovorawan,Y.

TITLE Molecular Characterization of Respiratory Syncytial Virus in  
Thailand, 2012-2015

JOURNAL Unpublished

REFERENCE 2 (bases 1 to 651)

AUTHORS Thongpan,I., Mauleekoonphairoj,J., Vichiwattana,P., Korkong,S.,  
Vongpunsawad,S. and Poovorawan,Y.

TITLE Direct Submission

JOURNAL Submitted (13-DEC-2016) Department of Pediatrics, Center of  
Excellence in Clinical Virology, Faculty of Medicine, Chulalongkorn  
University, Bangkok 10330, Thailand

COMMENT ##Assembly-Data-START##

Assembly Method :: DNASTAR-Lasergene v. 6  
Sequencing Technology :: Sanger dideoxy sequencing  
##Assembly-Data-END##

FEATURES Location/Qualifiers

source 1..651  
/organism="Human respiratory syncytial virus A"  
/mol\_type="viral cRNA"  
/isolate="TH-CU/CB49/2013"  
/host="Homo sapiens"  
/db\_xref="taxon:208893"  
/country="Thailand"  
/collection\_date="01-Jul-2013"  
/note="group: A"

CDS <1..651  
/note="G protein"  
/codon\_start=1  
/product="attachment glycoprotein"  
/protein\_id="APY20384"  
/translation="GTTSQSTTILASTTSSAESTPQSTTVKIKNTTTTQILPSKPTTK  
QRQNKPKQNKPNNDHFHFEVFNFPVPCISCSNNPTCWAICKRIPNKKPGKKTTKPTKKPT  
LKTTKKDPKPQTTKPKKVLTTKPTGKPTINTTKTNI RTLLTSNTKGNPEHTSQEETL  
HSTTSEGYPSPSQVYTTSGQEETLHSTTSEGYPSPSQVHTTSEYLSQSLSSSNTTK"

ORIGIN

1 ggaactacat cacaatccac caccatacta gttcaacaa catcaagtgc tgagtcaacc  
61 ccacaatcca caacagtcaa gatcaaaaac acaacaacaa cccaaatatt acctagcaaa  
121 cccaccacaa aacaacgcca aaataaacca caaaacaaac ccaacaatga ttttcacttt  
181 gaagtgttca atttgtacc ctgcagcata tgcagcaaca atccaacctg ctgggccatc  
241 tgcaagagaa taccaacaa aaaacctgga aagaaaacca ctaccaagcc cacaaaaaaa  
301 ccaacctca agacaacaa aaaagatccc aaacctcaa ccacaaaacc aaagaaagta  
361 ctactacca agcctacagg aaagccaacc atcaacacca ctaaaacaaa catcagaact  
421 aactgetca cctccaacac caaaggaaat ccagaacaca caagtcaaga ggaaaccctc  
481 cactcaacca cctccgaagg ctatccaagc ccatcacaag tctatacaac atccgggtcaa  
541 gaggaacecc tcaactcaac cacctcggaa ggctatcaa gcccataca agtccataca  
601 acatccgagt acctatcaca atctctatct tcacccaaca caacaaaatg a

//

LOCUS KY328044 651 bp cRNA linear VRL 12-DEC-2016  
DEFINITION Human respiratory syncytial virus A isolate TH-CU/B12405/2015  
attachment glycoprotein gene, partial cds.

ACCESSION KY328044

VERSION KY328044

KEYWORDS

SOURCE Human respiratory syncytial virus A

ORGANISM Human respiratory syncytial virus A

Viruses; ssRNA viruses; ssRNA negative-strand viruses; Mononegavirales; Pneumoviridae; Orthopneumovirus.

REFERENCE 1 (bases 1 to 651)

AUTHORS Thongpan,I., Mauleekoonphairoj,J., Vichiwattana,P., Korkong,S., Vongpunsawad,S. and Poovorawan,Y.

TITLE Molecular Characterization of Respiratory Syncytial Virus in Thailand, 2012-2015

JOURNAL Unpublished

REFERENCE 2 (bases 1 to 651)

AUTHORS Thongpan,I., Mauleekoonphairoj,J., Vichiwattana,P., Korkong,S., Vongpunsawad,S. and Poovorawan,Y.

TITLE Direct Submission

JOURNAL Submitted (13-DEC-2016) Department of Pediatrics, Center of Excellence in Clinical Virology, Faculty of Medicine, Chulalongkorn University, Bangkok 10330, Thailand

COMMENT ##Assembly-Data-START##

Assembly Method :: DNASTAR-Lasergene v. 6  
Sequencing Technology :: Sanger dideoxy sequencing  
##Assembly-Data-END##

FEATURES Location/Qualifiers

source 1..651  
/organism="Human respiratory syncytial virus A"  
/mol\_type="viral cRNA"  
/isolate="TH-CU/B12405/2015"  
/host="Homo sapiens"  
/db\_xref="taxon:208893"  
/country="Thailand"  
/collection\_date="30-Jul-2015"  
/note="group: A"

CDS <1..651  
/note="G protein"  
/codon\_start=1  
/product="attachment glycoprotein"  
/protein\_id="APY20385"  
/translation="GTTSQSTTILASTTPSAESTPQSTTVKIKNTTTTQILPSKPTTK  
QRQNKPNKPNDFHFEVFNFPVPCISCSNNPTCWAICKRIPNKKPGKKTTKPTKKPT  
LKTTKKDPKPKQTTKPKVLTTKPTGKPTINTTKTNI RTLLTSNTKGNPEHTSQEETL  
HSTTSEGYLSPSQVYTTSGQEETLHSTTSEGYLSPSQVYTTSEYLSQSLSSSNTTK"

ORIGIN

1 ggaactacat cacaatccac caccatacta gttcaacaa caccaagtgc tgagtaacc  
61 ccacaatcca caacagteaa gatcaaaaac acaacaaca cccaaatatt acctagcaaa  
121 cccaccacaa aacaacgcca aaataaacca caaaacaac ccaacaatga tttcacttt  
181 gaagtgtca atttgtacc ctgcagcata tgcagcaaca atccaacctg ctgggccatc  
241 tgcaagagaa taccaaacaa aaaacctgga aagaaaacca ccaccaagcc cacaaaaaaa  
301 ccaacctca agacaaccaa aaaagatecc aaacctcaaa ccacaaaacc aaaggaagta  
361 ctactacca agcctacagg aaagccaacc atcaacacca ccaaacaaca catcagaact  
421 aactgctca ctccaacac caaaggaaat ccagaacaca caagtcaaga ggaaaccctc  
481 cactcaacca cctcgaagg ctatctaagc ccateccaag tetatacaac atccggtaa  
541 gaggaacc tccaactaac cacctcgaa ggctatctaa gccatcaca agtctataca  
601 acatcagat acctatcaca atctctatct teatccaaca caacaaaatg a

//

LOCUS KY328045 651 bp cRNA linear VRL 12-DEC-2016  
DEFINITION Human respiratory syncytial virus A isolate TH-CU/B12546/2015  
attachment glycoprotein gene, partial cds.

ACCESSION KY328045

VERSION KY328045

KEYWORDS .

SOURCE Human respiratory syncytial virus A

ORGANISM Human respiratory syncytial virus A

Viruses; ssRNA viruses; ssRNA negative-strand viruses;  
Mononegavirales; Pneumoviridae; Orthopneumovirus.

REFERENCE 1 (bases 1 to 651)

AUTHORS Thongpan,I., Mauleekoonphairoj,J., Vichiwattana,P., Korkong,S.,  
Vongpunsawad,S. and Poovorawan,Y.

TITLE Molecular Characterization of Respiratory Syncytial Virus in  
Thailand, 2012-2015

JOURNAL Unpublished

REFERENCE 2 (bases 1 to 651)

AUTHORS Thongpan,I., Mauleekoonphairoj,J., Vichiwattana,P., Korkong,S.,  
Vongpunsawad,S. and Poovorawan,Y.

TITLE Direct Submission

JOURNAL Submitted (13-DEC-2016) Department of Pediatrics, Center of  
Excellence in Clinical Virology, Faculty of Medicine, Chulalongkorn  
University, Bangkok 10330, Thailand

COMMENT ##Assembly-Data-START##

Assembly Method :: DNASTAR-Lasergene v. 6  
Sequencing Technology :: Sanger dideoxy sequencing  
##Assembly-Data-END##

FEATURES Location/Qualifiers

source 1..651  
/organism="Human respiratory syncytial virus A"  
/mol\_type="viral cRNA"  
/isolate="TH-CU/B12546/2015"  
/host="Homo sapiens"  
/db\_xref="taxon:208893"  
/country="Thailand"  
/collection\_date="11-Aug-2015"  
/note="group: A"

CDS <1..651  
/note="G protein"  
/codon\_start=1  
/product="attachment glycoprotein"  
/protein\_id="APY20386"  
/translation="GTTSQSTTILASTTPSAESTPQSTTVKIKNTTTTQILPSKPTTK  
QRQNKPNKPNDFHFEVFNFPVPCISCSNNPTCWAICKRIPNKKPGKKTTKPTKKPT  
LKTTKKDPKPQTTKPKVLTTKPTGKPTINTTKTNI RTLLTSNTKGNPEHTSQEETL  
HSTTSEGYLSPSQVYTTSGQEETLHSTTSEGYLSPSQVYTTSEYLSQSLSSSNTTK"

ORIGIN

1 ggaactacat cacaatccac caccatacta gttcaacaa caccaagtgc tgagtcaacc  
61 cacaatcca caacagtcaa gatcaaaaaa acaacaacaa ccaaatatt acctagcaaa  
121 cccaccacaa aacaacgcca aataaacca caaaacaac ccaacaatga tttcacttt  
181 gaagtgttca atttgtacc ctgcagcata tgcagcaaca atccaacctg ctgggccatc  
241 tgcaagagaa taccaacaa aaaacctgga aagaaaacca ccaccaagcc cacaaaaaaa  
301 ccaacctca agacaacaa aaaagatccc aaacctcaaa ccacaaaacc aaaggaagta  
361 ctactacca agcctacagg aaagccaacc atcaacacca caaaacaaa catcagaact

421 acactgetca cctccaacac caaaggaaat ccagaacaca caagtcaaga ggaaaccctc  
481 cactcaacca cctccgaagg ctatctaagc ccatccaag tctatacaac atccggtaa  
541 gaggaaacc tccactcaac cacctcggaa ggctatctaa gccatcaca agtctataca  
601 acatccgagt acctatcaca atctctatct tcattcaaca caacaaaatg a

//

LOCUS KY328046 651 bp cRNA linear VRL 12-DEC-2016

DEFINITION Human respiratory syncytial virus A isolate TH-CU/C6214/2015  
attachment glycoprotein gene, partial cds.

ACCESSION KY328046

VERSION KY328046

KEYWORDS .

SOURCE Human respiratory syncytial virus A

ORGANISM Human respiratory syncytial virus A

Viruses; ssRNA viruses; ssRNA negative-strand viruses;

Mononegavirales; Pneumoviridae; Orthopneumovirus.

REFERENCE 1 (bases 1 to 651)

AUTHORS Thongpan,I., Mauleekoonphairoj,J., Vichiwattana,P., Korkong,S.,  
Vongpunsawad,S. and Poovorawan,Y.

TITLE Molecular Characterization of Respiratory Syncytial Virus in  
Thailand, 2012-2015

JOURNAL Unpublished

REFERENCE 2 (bases 1 to 651)

AUTHORS Thongpan,I., Mauleekoonphairoj,J., Vichiwattana,P., Korkong,S.,  
Vongpunsawad,S. and Poovorawan,Y.

TITLE Direct Submission

JOURNAL Submitted (13-DEC-2016) Department of Pediatrics, Center of  
Excellence in Clinical Virology, Faculty of Medicine, Chulalongkorn  
University, Bangkok 10330, Thailand

COMMENT ##Assembly-Data-START##

Assembly Method :: DNASTAR-Lasergene v. 6

Sequencing Technology :: Sanger dideoxy sequencing

##Assembly-Data-END##

FEATURES Location/Qualifiers

source 1..651

/organism="Human respiratory syncytial virus A"

/mol\_type="viral cRNA"

/isolate="TH-CU/C6214/2015"

/host="Homo sapiens"

/db\_xref="taxon:208893"

/country="Thailand"

/collection\_date="04-Nov-2015"

/note="group: A"

CDS <1..651

/note="G protein"

/codon\_start=1

/product="attachment glycoprotein"

/protein\_id="APY20387"

/translation="GTTSQSTTILASTTPSAESTPQSTTVKIKNTTTTQILPSKPTTK

QRQNKPNKPNDFHFEVFNFPVPCISCSNNPTCWAICKRIPNKKPGKKTTKPTKKPT

LKTTKDKPKPQTTKPKVLTTKPTGKPTINTTKNIRTTLLTSNTKGNPEHTSQEETL

HSTTSEGYLSPSQVYTTSGQEETLHSTTSEGYLSPSQVYTTSEYLSQSLSSSNTTK"

ORIGIN

1 ggaactacat cacaatccac caccatacta gcttcaacaa caccaagtgc tgagtcaacc

61 ccacaatcca caacagtaa gatcaaaaac acaacaacaa cccaatatt acctagcaaa

121 cccaccacaa aacaacgcca aaataaacca caaacaacac ccaacaatga tttcacttt  
181 gaagtgttca atttgtacc ctgcagcata tgcagcaaca atccaactg ctgggccatc  
241 tgcaagagaa taccaacaaa aaaacctgga aagaaaacca ccaccaagcc cacaaaaaaa  
301 ccaacctca agacaaccaa aaaagatecc aaacctcaaa ccacaaaacc aaaggaagta  
361 ctactacca agcctacagg aaagccaacc atcaacacca ccaaaacaaa catcagaacc  
421 aactgctca cctccaacac caaaggaaat ccagaacaca caagtcaaga ggaaaccctc  
481 cactcaacca cctcgaagg ctatctaagc ccateccaag tetatacaac atccggtaa  
541 gaggaaccc tccactcaac cacctcgaag ggctatctaa gccatcaca agtctataca  
601 acatcagagt acctatcaca atctctatct teatccaaca caacaaatg a

//

LOCUS KY328047 651 bp cRNA linear VRL 12-DEC-2016  
DEFINITION Human respiratory syncytial virus A isolate TH-CU/B12568/2015  
attachment glycoprotein gene, partial cds.

ACCESSION KY328047

VERSION KY328047

KEYWORDS .

SOURCE Human respiratory syncytial virus A

ORGANISM Human respiratory syncytial virus A  
Viruses; ssRNA viruses; ssRNA negative-strand viruses;  
Mononegavirales; Pneumoviridae; Orthopneumovirus.

REFERENCE 1 (bases 1 to 651)

AUTHORS Thongpan,I., Mauleekoonphairoj,J., Vichiwattana,P., Korkong,S.,  
Vongpunsawad,S. and Poovorawan,Y.

TITLE Molecular Characterization of Respiratory Syncytial Virus in  
Thailand, 2012-2015

JOURNAL Unpublished

REFERENCE 2 (bases 1 to 651)

AUTHORS Thongpan,I., Mauleekoonphairoj,J., Vichiwattana,P., Korkong,S.,  
Vongpunsawad,S. and Poovorawan,Y.

TITLE Direct Submission

JOURNAL Submitted (13-DEC-2016) Department of Pediatrics, Center of  
Excellence in Clinical Virology, Faculty of Medicine, Chulalongkorn  
University, Bangkok 10330, Thailand

COMMENT ##Assembly-Data-START##

Assembly Method :: DNASTAR-Lasergene v. 6  
Sequencing Technology :: Sanger dideoxy sequencing  
##Assembly-Data-END##

FEATURES Location/Qualifiers

source 1..651  
/organism="Human respiratory syncytial virus A"  
/mol\_type="viral cRNA"  
/isolate="TH-CU/B12568/2015"  
/host="Homo sapiens"  
/db\_xref="taxon:208893"  
/country="Thailand"  
/collection\_date="16-Aug-2015"  
/note="group: A"

CDS <1..651  
/note="G protein"  
/codon\_start=1  
/product="attachment glycoprotein"  
/protein\_id="APY20388"  
/translation="GTTSQSTTILASTTPSAESTPQSTTVKIKNTTTTQILPSKPTTK  
QRQNKPNKPNDFHFEVFNFPVPCISCSNNPTCWAICKRIPNKKPGKKTTKPTKKPT



LKTTKKDPKPQTTKTKEALTTKPTGKPTINTTKTNIRTTLLTSNTKGNPEHTSQQEIL  
HSTTSEGYPSPSQVYTTSGQEETLHSTTSEGYPSPSQVYTTSEYLSQSLSSSNTTK"

ORIGIN

1 ggaactacat cacaatccac caccatacta gcttcaacaa caccaagtgc tgagtcaacc  
61 ccacaatcca caacagtcaa gatcaaaaac acaacaacaa cccaaatatt acctagcaaa  
121 cccaccacaa aacaacgcca aaacaaccca caaaacaaac ccaacaatga tttcactt  
181 gaagtgtca atttgtacc ctgcagcata tgcagcaaca atccaacctg ctgggccatc  
241 tgcaagagaa taccaaacaa aaaacctgga aagaaaacca ccaccaagcc cacaaaaaaa  
301 ccaacctca agacaaccaa aaaagatccc aaacctcaaa ccacaaaaac aaaggaagca  
361 ctaccacca agcctacagg aaagccaacc atcaacacca ccaaaacaaa catcagaact  
421 aactgetca cctccaacac caaaggaaat ccagaacaca caagtcaaga ggaaatctc  
481 cactcaacca cctccgaagg ctatccaage ccatccaag tctacacaac atccggtaa  
541 gaggaacc tccactcaac cacctccgaa ggctatcaa gccatcaca agtctataca  
601 acatccgagt acctatcaca atctctatct tcatccaaca caacaaatg a

//

LOCUS KY328048 651 bp cRNA linear VRL 12-DEC-2016  
DEFINITION Human respiratory syncytial virus A isolate TH-CU/B12664/2015  
attachment glycoprotein gene, partial cds.

ACCESSION KY328048

VERSION KY328048

KEYWORDS .

SOURCE Human respiratory syncytial virus A

ORGANISM Human respiratory syncytial virus A

Viruses; ssRNA viruses; ssRNA negative-strand viruses;  
Mononegavirales; Pneumoviridae; Orthopneumovirus.

REFERENCE 1 (bases 1 to 651)

AUTHORS Thongpan,I., Mauleekoonphairoj,J., Vichiwattana,P., Korkong,S.,  
Vongpunsawad,S. and Poovorawan,Y.

TITLE Molecular Characterization of Respiratory Syncytial Virus in  
Thailand, 2012-2015

JOURNAL Unpublished

REFERENCE 2 (bases 1 to 651)

AUTHORS Thongpan,I., Mauleekoonphairoj,J., Vichiwattana,P., Korkong,S.,  
Vongpunsawad,S. and Poovorawan,Y.

TITLE Direct Submission

JOURNAL Submitted (13-DEC-2016) Department of Pediatrics, Center of  
Excellence in Clinical Virology, Faculty of Medicine, Chulalongkorn  
University, Bangkok 10330, Thailand

COMMENT ##Assembly-Data-START##

Assembly Method :: DNASTAR-Lasergene v. 6  
Sequencing Technology :: Sanger dideoxy sequencing  
##Assembly-Data-END##

FEATURES Location/Qualifiers

source 1..651  
/organism="Human respiratory syncytial virus A"  
/mol\_type="viral cRNA"  
/isolate="TH-CU/B12664/2015"  
/host="Homo sapiens"  
/db\_xref="taxon:208893"  
/country="Thailand"  
/collection\_date="19-Aug-2015"  
/note="group: A"

CDS <1..651  
/note="G protein"

/codon\_start=1  
/product="attachment glycoprotein"  
/protein\_id="APY20389"  
/translation="GTTSQSTTILASTTPSAESTPQSTTVKIKNTTTTQILPSKPTTK  
QRQNKPNKPNDFHFEVFNFPVPCISCSNNPTCWAICKRIPNKKPGKKTTKPTKKPT  
LKTTKKDPKPQTTKTKEALTTKPTGKPTINTTKTNIRTTLLTSNTKGNPEHTSQEEII  
HSTTSEGYPSPSQVYTTSGQEETLHSTTSEGYPSPSQVYTTSEYLSQSLSSSNTTK"

ORIGIN

1 ggaactacat cacaatccac caccatacta gcttcaacaa caccaagtgc tgagtcaacc  
61 ccacaatcca caacagtcaa gatcaaaaac acaacaacaa cccaatatt acctagcaaa  
121 cccaccacaa aacaacgcca aaacaacaa caaaacaaac ccaacaatga ttttcactt  
181 gaagtgttca atttgtacc ctgcagcata tgcagcaaca atccaactg ctgggccatc  
241 tgcaagagaa taccaacaa aaaacctgga aagaaaacca ccaccaagcc cacaaaaaaa  
301 ccaacctca agacaacaa aaaagatccc aaacctcaa ccacaaaaac aaaggaagca  
361 ctcaccacca agcctacagg aaagccaacc atcaacacca caaaacaaa catcagaact  
421 aactgtctca cctccaacac caaaggaaat ccagaacaca caagtcaaga ggaaatcatc  
481 cactcaacca cctccgaagg ctatccaagc ccatccaag tctacacaac atccggtcaa  
541 gaggaaacc tccactcaac cacctcgaa ggctatcaa gccatcaca agtctataca  
601 acatccgagt acctatcaca atctctatct tcatccaaca caacaaaatg a

//

LOCUS KY328049 601 bp cRNA linear VRL 13-DEC-2016  
DEFINITION Human respiratory syncytial virus A isolate ON2/TH-CU/B10640/2014  
attachment glycoprotein gene, partial cds.

ACCESSION KY328049

VERSION KY328049

KEYWORDS .

SOURCE Human respiratory syncytial virus A

ORGANISM Human respiratory syncytial virus A

Viruses; ssRNA viruses; ssRNA negative-strand viruses;  
Mononegavirales; Pneumoviridae; Orthopneumovirus.

REFERENCE 1 (bases 1 to 601)

AUTHORS Thongpan,I., Mauleekoonphairoj,J., Vichiwattana,P., Korkong,S.,  
Vongpunsawad,S. and Poovorawan,Y.

TITLE Molecular Characterization of Respiratory Syncytial Virus in  
Thailand, 2012-2015

JOURNAL Unpublished

REFERENCE 2 (bases 1 to 601)

AUTHORS Thongpan,I., Mauleekoonphairoj,J., Vichiwattana,P., Korkong,S.,  
Vongpunsawad,S. and Poovorawan,Y.

TITLE Direct Submission

JOURNAL Submitted (13-DEC-2016) Department of Pediatrics, Center of  
Excellence in Clinical Virology, Faculty of Medicine, Chulalongkorn  
University, Bangkok 10330, Thailand

COMMENT ##Assembly-Data-START##

Assembly Method :: DNASTAR-Lasergene v. 6  
Sequencing Technology :: Sanger dideoxy sequencing  
##Assembly-Data-END##

FEATURES Location/Qualifiers

source 1..601  
/organism="Human respiratory syncytial virus A"  
/mol\_type="viral cRNA"  
/isolate="ON2/TH-CU/B10640/2014"  
/host="Homo sapiens"  
/db\_xref="taxon:208893"

/country="Thailand"  
/collection\_date="12-Aug-2014"  
/note="group: A"  
CDS <1..>601  
/note="G protein"  
/codon\_start=1  
/product="attachment glycoprotein"  
/protein\_id="APY20390"  
/translation="ISFSNLSGTTTSQSTTILASTTPSAESTPQSTTVKIKNTTTTQIL  
PSKPTTKQRQNKPKQNKPNDFHFEVFNFPVCSICSNNPTCWAICKRIPNKKPGKKT  
KPTKKPTLKTTKKDPKPKQTTKPKVELTTKPTGRPTINTTKTNIRTTLLTSNTKGNPEH  
TSQEETLHSTTSEGYLSPSHVYTTSGQEETLHSTTSEGYL"

#### ORIGIN

1 atcagcttct ccaatctgtc cggaactaca tcacaatcca ccaccatact agcttcaaca  
61 acaccaagtg ctgagtcaac cccacaatcc acaacagtca agatcaaaaa cacaacaaca  
121 acccaaatat tacctagcaa acccaccaca aaacaacgcc aaaataaacc acaaaacaaa  
181 cccaacaatg atttctactt tgaagtgttc aatthttgtac cctgcagcat atgcagcaac  
241 aatccaacct gctgggcat ctgcaagaga ataccaaca aaaacctgg aaagaaaacc  
301 accaccaagc ccacaaaaa accaacctc aagacaacca aaaaagatcc caaacctcaa  
361 accacaaaac caaaggaagt actcactacc aagcccacag gaaggccaac catcaacacc  
421 actaaaacaa acatcagaac tacactgtc acctccaaca ccaaggaaa tccagaacac  
481 acaagtaag aggaaacct cactcaacc acctccgaag gctatctaag cccatccat  
541 gtctatacaa catccgggca agaggaaacc ctccactcaa ccactccga aggctatcta  
601 a

//

LOCUS KY328050 648 bp cRNA linear VRL 13-DEC-2016  
DEFINITION Human respiratory syncytial virus A isolate TH-CU/B10806/2014  
attachment glycoprotein gene, partial cds.

ACCESSION KY328050

VERSION KY328050

KEYWORDS .

SOURCE Human respiratory syncytial virus A

ORGANISM Human respiratory syncytial virus A

Viruses; ssRNA viruses; ssRNA negative-strand viruses;  
Mononegavirales; Pneumoviridae; Orthopneumovirus.

REFERENCE 1 (bases 1 to 648)

AUTHORS Thongpan,I., Mauleekoonphairoj,J., Vichiwattana,P., Korkong,S.,  
Vongpunsawad,S. and Poovorawan,Y.

TITLE Molecular Characterization of Respiratory Syncytial Virus in  
Thailand, 2012-2015

JOURNAL Unpublished

REFERENCE 2 (bases 1 to 648)

AUTHORS Thongpan,I., Mauleekoonphairoj,J., Vichiwattana,P., Korkong,S.,  
Vongpunsawad,S. and Poovorawan,Y.

TITLE Direct Submission

JOURNAL Submitted (13-DEC-2016) Department of Pediatrics, Center of  
Excellence in Clinical Virology, Faculty of Medicine, Chulalongkorn  
University, Bangkok 10330, Thailand

COMMENT ##Assembly-Data-START##

Assembly Method :: DNASTAR-Lasergene v. 6  
Sequencing Technology :: Sanger dideoxy sequencing  
##Assembly-Data-END##

FEATURES Location/Qualifiers

source 1..648

/organism="Human respiratory syncytial virus A"

/mol\_type="viral cRNA"

/isolate="TH-CU/B10806/2014"

/host="Homo sapiens"

/db\_xref="taxon:208893"

/country="Thailand"

/collection\_date="27-Aug-2014"

/note="group: A"

CDS <1..>648

/note="G protein"

/codon\_start=1

/product="attachment glycoprotein"

/protein\_id="APY20391"

/translation="QNPQLGISFSNLSGTTTSQSTTILASTTPSAESTPQSTTVKIKNT

TTTQILPSKTTTKQHQNKPQNKPNDFHFEVFNFPVPCISCSNNPTCWTICKRIPNKKP

GKKTITTKPTKKPTLKTTKKDKPKPQTTKPKVELTTKPTGKPTINTTKTNIRTTLLTSNT

KGNPEHTSQEETLHSTTSEGYLSPSQVYTTSGQEETLHSTTSEGYLSPSQVYTTSG"

#### ORIGIN

1 cagaatcccc agettggaat cagcttctcc aatctgtccg gaactacatc acaatccacc  
61 accatactag ctcaacaac accaagtgtc gagtcaaccc cacaatccac aacagtcaag  
121 atcaaaaaca caacaacaac ccaaatatta cctagcaaaa ccaccacaaa acaacaccaa  
181 aataaaccac aaaacaacc caacaatgat ttcactttg aagtgttcaa tttgtacc  
241 tgcagcatat gcagcaaca tccaacctgc tggaccatct gcaagagaat accaaacaaa  
301 aaacctggaa agaaaaccac caccaagccc acaaaaaaac caacctcaa gacaacaaa  
361 aaagatecca aacctcaaac caaaaacca aaggaagtac tcaactacaa gectacagga  
421 aagccaacca tcaacaccac taaaacaac atcagaacta cactgctcac ctccaacacc  
481 aaaggaaatc cagaacacac aagtcaagag gaaacctcc actcaaccac ctccgaaggc  
541 tatctaagcc catcaaatg ctatacaaca tceggtaag aggaaacct ccaactcaac  
601 acctcegaag gttatctaag ccatcaciaa gtctatacaa cctcegga

//

LOCUS KY328051 653 bp cRNA linear VRL 13-DEC-2016

DEFINITION Human respiratory syncytial virus A isolate TH-CU/B10995/2014  
attachment glycoprotein gene, partial cds.

ACCESSION KY328051

VERSION KY328051

KEYWORDS .

SOURCE Human respiratory syncytial virus A

ORGANISM Human respiratory syncytial virus A

Viruses; ssRNA viruses; ssRNA negative-strand viruses;

Mononegavirales; Pneumoviridae; Orthopneumovirus.

REFERENCE 1 (bases 1 to 653)

AUTHORS Thongpan,I., Mauleekoonphairoj,J., Vichiwattana,P., Korkong,S.,  
Vongpunsawad,S. and Poovorawan,Y.

TITLE Molecular Characterization of Respiratory Syncytial Virus in  
Thailand, 2012-2015

JOURNAL Unpublished

REFERENCE 2 (bases 1 to 653)

AUTHORS Thongpan,I., Mauleekoonphairoj,J., Vichiwattana,P., Korkong,S.,  
Vongpunsawad,S. and Poovorawan,Y.

TITLE Direct Submission

JOURNAL Submitted (13-DEC-2016) Department of Pediatrics, Center of  
Excellence in Clinical Virology, Faculty of Medicine, Chulalongkorn  
University, Bangkok 10330, Thailand

COMMENT ##Assembly-Data-START##

Assembly Method :: DNASTAR-Lasergene v. 6  
Sequencing Technology :: Sanger dideoxy sequencing  
##Assembly-Data-END##

FEATURES Location/Qualifiers

source 1..653  
/organism="Human respiratory syncytial virus A"  
/mol\_type="viral cRNA"  
/isolate="TH-CU/B10995/2014"  
/host="Homo sapiens"  
/db\_xref="taxon:208893"  
/country="Thailand"  
/collection\_date="13-Sep-2014"  
/note="group: A"  
CDS <1..>653  
/note="G protein"  
/codon\_start=1  
/product="attachment glycoprotein"  
/protein\_id="APY20392"  
/translation="PQLGISFSNLSGTTSQSTTILASTTPSAESTPQSTTVKIKNTTT  
TQILPSKPTTKQRQNKPKPNNDFFHEVFNFVPCSICSNNPWCWAICKRIPNKKPGK  
KTTTKPTKKPTLKTTKKDPKPKQTTKPKVLTTKPTGKPTINTTKTNIRTTLLTSNTKG  
NPEHTSQEETLHSTTSEGYLSPSQVYTTSGQEETLHSTTSEGYLSPSQVYTTSEYLS"

ORIGIN

1 cccagcttg gaatcagctt ctccaatctg tccggaacta catcacaate caccaccata  
61 ctagcttcaa caacaccaag tgctgagtc accccacaat ccacaacagt caagatcaaa  
121 aacacaacaa caaccacaaat attacctagc aaaccacca caaacaacg ccaaaataaa  
181 ccacaaaaca aaccacaaa tgattttcac tttgaagtgt tcaattttgt accctgcage  
241 atatgcagca acaatccaac ctgctggggc atctgcaaga gaatacaaaa caaaaaacct  
301 ggaaagaaaa ccaccacaa gccacaaaa aaaccaacce tcaagacaac caaaaaagat  
361 cccaaacctc aaaccacaaa accaaaggaa gtactacta ccaagctac aggaaagcca  
421 accatcaaca cactaaaac aaacatcaga actacactgc tcacctcaa caccaaagga  
481 aatccagaac acacaagtca agaggaaacc ctcaactcaa ccacctcga aggctatcta  
541 agcccatcac aagtctatac aacatccggt caagaggaaa cctccactc aaccacctc  
601 gaaggtatc taagccatc acaagtctat acaacatccg agtacctatc aca

//

LOCUS KY328052 333 bp cRNA linear VRL 13-DEC-2016  
DEFINITION Human respiratory syncytial virus A isolate TH-CU/B12350/2015  
attachment glycoprotein gene, partial cds.

ACCESSION KY328052

VERSION KY328052

KEYWORDS .

SOURCE Human respiratory syncytial virus A

ORGANISM Human respiratory syncytial virus A

Viruses; ssRNA viruses; ssRNA negative-strand viruses;

Mononegavirales; Pneumoviridae; Orthopneumovirus.

REFERENCE 1 (bases 1 to 333)

AUTHORS Thongpan,I., Mauleekoonphairoj,J., Vichiwattana,P., Korkong,S.,  
Vongpunsawad,S. and Poovorawan,Y.

TITLE Molecular Characterization of Respiratory Syncytial Virus in  
Thailand, 2012-2015

JOURNAL Unpublished

REFERENCE 2 (bases 1 to 333)

AUTHORS Thongpan,I., Mauleekoonphairoj,J., Vichiwattana,P., Korkong,S.,  
Vongpunsawad,S. and Poovorawan,Y.

TITLE Direct Submission  
JOURNAL Submitted (13-DEC-2016) Department of Pediatrics, Center of Excellence in Clinical Virology, Faculty of Medicine, Chulalongkorn University, Bangkok 10330, Thailand  
COMMENT ##Assembly-Data-START##  
Assembly Method :: DNASTAR-Lasergene v. 6  
Sequencing Technology :: Sanger dideoxy sequencing  
##Assembly-Data-END##  
FEATURES Location/Qualifiers  
source 1..333  
/organism="Human respiratory syncytial virus A"  
/mol\_type="viral cRNA"  
/isolate="TH-CU/B12350/2015"  
/host="Homo sapiens"  
/db\_xref="taxon:208893"  
/country="Thailand"  
/collection\_date="10-Aug-2015"  
/note="group: A"  
CDS <1..333  
/note="G protein"  
/codon\_start=1  
/product="attachment glycoprotein"  
/protein\_id="APY20393"  
/translation="KKDPNPQTTPKPEVLTTKPTRKPTINTTKTNIRTTLLTSNTKGN  
PEHTSQEETLHSTTSKGHSPSPVHTTSGQEETLHSTTSEGHSPSPVYTTSEYLSQS  
PSSSNTTK"  
ORIGIN  
1 aaaaaagatc ccaaccetca aaccacaaaa ccaaaggaag tactcactac caagcctaca  
61 agaaagccaa ccatcaacac caccaaaaca aacatcagaa ctactctgct cacctccaac  
121 accaaaggaa atccagaaca cacaagtcaa gaggaaacce tccactcaac cacctccaaa  
181 ggccatccaa gccatccca agtccacaca acatccggtc aagaggaaac ctccactca  
241 accactccg aagccatcc aagccatca caagtctata caacatccga gtacctatca  
301 caatctccat cttcatccaa cacaacaaaa tga  
//  
LOCUS KY328053 699 bp cRNA linear VRL 13-DEC-2016  
DEFINITION Human respiratory syncytial virus A isolate ON2/TH-CU/B12560/2015  
attachment glycoprotein gene, partial cds.  
ACCESSION KY328053  
VERSION KY328053  
KEYWORDS .  
SOURCE Human respiratory syncytial virus A  
ORGANISM Human respiratory syncytial virus A  
Viruses; ssRNA viruses; ssRNA negative-strand viruses;  
Mononegavirales; Pneumoviridae; Orthopneumovirus.  
REFERENCE 1 (bases 1 to 699)  
AUTHORS Thongpan,I., Mauleekoonphairoj,J., Vichiwattana,P., Korkong,S.,  
Vongpunsawad,S. and Poovorawan,Y.  
TITLE Molecular Characterization of Respiratory Syncytial Virus in  
Thailand, 2012-2015  
JOURNAL Unpublished  
REFERENCE 2 (bases 1 to 699)  
AUTHORS Thongpan,I., Mauleekoonphairoj,J., Vichiwattana,P., Korkong,S.,  
Vongpunsawad,S. and Poovorawan,Y.  
TITLE Direct Submission

JOURNAL Submitted (13-DEC-2016) Department of Pediatrics, Center of Excellence in Clinical Virology, Faculty of Medicine, Chulalongkorn University, Bangkok 10330, Thailand

COMMENT ##Assembly-Data-START##

Assembly Method :: DNASTAR-Lasergene v. 6  
Sequencing Technology :: Sanger dideoxy sequencing  
##Assembly-Data-END##

FEATURES Location/Qualifiers

source 1..699  
/organism="Human respiratory syncytial virus A"  
/mol\_type="viral cRNA"  
/isolate="ON2/TH-CU/B12560/2015"  
/host="Homo sapiens"  
/db\_xref="taxon:208893"  
/country="Thailand"  
/collection\_date="16-Aug-2015"  
/note="group: A"

CDS <1..699  
/note="G protein"  
/codon\_start=1  
/product="attachment glycoprotein"  
/protein\_id="APY20394"  
/translation="YLTQNPQLGISFSNLSGTTTSQSTTILASTTPSAESTPQSTTVKI  
INTTTTQILPSKPTTKQRQNKPKQNKPNNDFFHFVFNFVPCISCSNNPTCWAICKRIPN  
KKPGKKTTKPTKKPTLTKTKKDPKPQTTKPKPEVLTKPTGKPTINTTKTNSRTLLT  
SNTKGNPEHTSQKETLHSTTSEGYLSPSQVYTTSGQEETLHSTTSEGYSPSQVYTT  
EYLSQSLSSNTTK"

ORIGIN

1 tacctcacc agaatcccca gcttggaatc agcttctcca atctgtccgg aactacatca  
61 caatccacca ccatactagc tcaacaaca ccaagtgtg agtcaacccc acaatccaca  
121 acagtcaaga tcataaacac aacaacaacc caaatattac ctageaaacc caccacaaa  
181 caacgccaaa ataaaccaca aacaaacccc aacaatgatt ttcacttga agtgttcaat  
241 ttgtacctc gcagcatatg tagcaacaat ccaacctgct gggccatctg caagagaata  
301 ccaaacaaaa aacctggaaa gaaaaccacc accaagccca caaaaaaac aacctcaag  
361 acaacacaaa aagatcccaa acctcaaacc acaaaaccaa aggaagtact cactaccaag  
421 ctacaggaa agccaacat caacaccact aaaacaaaca gcagaactac actgctcacc  
481 tccaacacca aaggaaatcc agaacacaca agtcaaaagg aaacctcca ctaaccacc  
541 tccgaaggct atctaagccc atcaaatgc tataacaat cgggtcaaga ggaaaccctc  
601 cactcaacca cctccgaagg ctatccaagc ccatcacaag tctataaac atccgagtac  
661 ctatcacaat ctctatctc atccaacaca acaaaatga

//

LOCUS KY328054 624 bp cRNA linear VRL 13-DEC-2016  
DEFINITION Human respiratory syncytial virus A isolate TH-CU/B10618/2014  
attachment glycoprotein gene, partial cds.

ACCESSION KY328054

VERSION KY328054

KEYWORDS .

SOURCE Human respiratory syncytial virus A

ORGANISM Human respiratory syncytial virus A  
Viruses; ssRNA viruses; ssRNA negative-strand viruses;  
Mononegavirales; Pneumoviridae; Orthopneumovirus.

REFERENCE 1 (bases 1 to 624)

AUTHORS Thongpan,I., Mauleekoonphairoj,J., Vichiwattana,P., Korkong,S.,  
Vongpunswad,S. and Poovorawan,Y.

TITLE Molecular Characterization of Respiratory Syncytial Virus in  
Thailand, 2012-2015  
JOURNAL Unpublished  
REFERENCE 2 (bases 1 to 624)  
AUTHORS Thongpan,I., Mauleekoonphairoj,J., Vichiwattana,P., Korkong,S.,  
Vongpunsawad,S. and Poovorawan,Y.

TITLE Direct Submission  
JOURNAL Submitted (13-DEC-2016) Department of Pediatrics, Center of  
Excellence in Clinical Virology, Faculty of Medicine, Chulalongkorn  
University, Bangkok 10330, Thailand

COMMENT ##Assembly-Data-START##  
Assembly Method :: DNASTAR-Lasergene v. 6  
Sequencing Technology :: Sanger dideoxy sequencing  
##Assembly-Data-END##

FEATURES Location/Qualifiers

source 1..624  
/organism="Human respiratory syncytial virus A"  
/mol\_type="viral cRNA"  
/isolate="TH-CU/B10618/2014"  
/host="Homo sapiens"  
/db\_xref="taxon:208893"  
/country="Thailand"  
/collection\_date="08-Aug-2014"  
/note="group: A"

CDS <1..624  
/note="G protein"  
/codon\_start=1  
/product="attachment glycoprotein"  
/protein\_id="APY20395"  
/translation="LASTTPSAESTPQSTTVKIKNTTTTQILPSKPTTKQRQNKPKQNK  
PNNDFHFVFNFPVPCICSNNPTCWAICKRIPNKKPGKTTTKPTKKPTLKTTKKDPK  
PQTTKPKEVLTTKPTGRPTINTTKTNI RTTLFTSNTKGNPEHTSQEETLHSTTSEGYL  
SPSQVYTTFGQEETLHSTTSEGYLSSSQVYTTSEYLSQSLSSSNTAK"

ORIGIN

1 ctagctcaa caacaccaag tgetgagtca accccacaat ccacaacagt caagatcaaa  
61 aacacaacia caacccaat attacctagc aaaccacca caaaacaacg caaaataaa  
121 ccacaaaaca aaccaacia tgattttcac ttgaagtgt tcaattttgt acctgcagc  
181 atatgcagca acaatccaac ctgetgggcc atctgcaaga gaatacaaaa caaaaaacct  
241 ggaaagaaaa ccaccacaa gccacaaaa aaaccaaccc tcaagacaac caaaaaagat  
301 cccaaacctc aaaccacaaa accaaaggaa gtactcacta ccaagcccac aggaaggcca  
361 accatcaaca ccactaaaac aaacatcaga actacactgt tcacctcaa caccaaagga  
421 aatccagaac acacaagtca agaggaaacc ctccactcaa ccacctccga aggetatcta  
481 agcccatccc aagtctatac aacattcggg caagaggaaa cctccactc aaccacctc  
541 gaaggctatc taagctcacc acaagtctat acaacatccg agtacctatc acaatcteta  
601 tttcatcca acacagcaaa atga

//

LOCUS KY328055 603 bp cRNA linear VRL 13-DEC-2016  
DEFINITION Human respiratory syncytial virus B isolate TH-CU/B10608/2014  
attachment glycoprotein gene, partial cds.

ACCESSION KY328055

VERSION KY328055

KEYWORDS .

SOURCE Human respiratory syncytial virus B

ORGANISM Human respiratory syncytial virus B



Viruses; ssRNA viruses; ssRNA negative-strand viruses;  
Mononegavirales; Pneumoviridae; Orthopneumovirus.

REFERENCE 1 (bases 1 to 603)

AUTHORS Thongpan,I., Mauleekoonphairoj,J., Vichiwattana,P., Korkong,S.,  
Vongpunsawad,S. and Poovorawan,Y.

TITLE Molecular Characterization of Respiratory Syncytial Virus in  
Thailand, 2012-2015

JOURNAL Unpublished

REFERENCE 2 (bases 1 to 603)

AUTHORS Thongpan,I., Mauleekoonphairoj,J., Vichiwattana,P., Korkong,S.,  
Vongpunsawad,S. and Poovorawan,Y.

TITLE Direct Submission

JOURNAL Submitted (13-DEC-2016) Department of Pediatrics, Center of  
Excellence in Clinical Virology, Faculty of Medicine, Chulalongkorn  
University, Bangkok 10330, Thailand

COMMENT ##Assembly-Data-START##

Assembly Method :: DNASTAR-Lasergene v. 6  
Sequencing Technology :: Sanger dideoxy sequencing  
##Assembly-Data-END##

FEATURES Location/Qualifiers

source 1..603  
/organism="Human respiratory syncytial virus B"  
/mol\_type="viral cRNA"  
/isolate="TH-CU/B10608/2014"  
/host="Homo sapiens"  
/db\_xref="taxon:208895"  
/country="Thailand"  
/collection\_date="04-Aug-2014"  
/note="group: B"

CDS <1..603  
/note="G protein"  
/codon\_start=1  
/product="attachment glycoprotein"  
/protein\_id="APY20396"  
/translation="IHTNSATISPNTKSETHHTTAQTKGTTSTPTQNNKPSTKPRPKN  
PPKKDDYHFEVFNFPVPCISCGNNQLCKSICKTIPSNKPKKPTTKPTNKPPTKTTNKR  
DPKTLAKTPKKETTINPTKKPTPKTTERDSTPQSTVLDITTSKHTERDTSTSQSIVL  
DTTTSKHTTQQQSLYSTTPENTPNSTQTPTASEASTSNST"

ORIGIN

1 atccacacaa actcagccac aatatcacc aatacaaat cagaaacaca ccatacaaca  
61 gcacaaacca aaggcacaac ctctactcca acacagaaca acaagccaag cacaaaacca  
121 cgtccaaaaa atccacaaa aaaagatgat taccatttg aagtgtcaa cttgttccc  
181 ttagtatat gtggcaaca tcaactctgc aatccattt gcaaaacaat accaagcaat  
241 aaaccaaaaga aaaaaccaac tacaaaaccc acaaacaaac cacctaccaa aaccacaaac  
301 aaaagagacc caaaacact agccaaaaca ccgaaaaaag aaaccacat taaccaaca  
361 aaaaaaccaa ccccaagac tacagaaaga gacaccagca cccacaate cactgtgctc  
421 gacataacca catcaaaaca cacagaaaga gacaccagca cctcacaate cattgtgctt  
481 gacacaacca catcaaaaca cacaaccaa cagcaatctc tctactcaac cacccccgaa  
541 aacacacca actccagca aacaccaca gcatccgagg cctccacate aaattctacc  
601 taa

//

LOCUS KY328056 603 bp cRNA linear VRL 13-DEC-2016  
DEFINITION Human respiratory syncytial virus B isolate TH-CU/B11014/2014  
attachment glycoprotein gene, partial cds.

ACCESSION KY328056

VERSION KY328056

KEYWORDS .

SOURCE Human respiratory syncytial virus B

ORGANISM Human respiratory syncytial virus B

Viruses; ssRNA viruses; ssRNA negative-strand viruses;  
Mononegavirales; Pneumoviridae; Orthopneumovirus.

REFERENCE 1 (bases 1 to 603)

AUTHORS Thongpan,I., Mauleekoonphairoj,J., Vichiwattana,P., Korkong,S.,  
Vongpunsawad,S. and Poovorawan,Y.

TITLE Molecular Characterization of Respiratory Syncytial Virus in  
Thailand, 2012-2015

JOURNAL Unpublished

REFERENCE 2 (bases 1 to 603)

AUTHORS Thongpan,I., Mauleekoonphairoj,J., Vichiwattana,P., Korkong,S.,  
Vongpunsawad,S. and Poovorawan,Y.

TITLE Direct Submission

JOURNAL Submitted (13-DEC-2016) Department of Pediatrics, Center of  
Excellence in Clinical Virology, Faculty of Medicine, Chulalongkorn  
University, Bangkok 10330, Thailand

COMMENT ##Assembly-Data-START##

Assembly Method :: DNASTAR-Lasergene v. 6  
Sequencing Technology :: Sanger dideoxy sequencing  
##Assembly-Data-END##

FEATURES Location/Qualifiers

source 1..603

/organism="Human respiratory syncytial virus B"  
/mol\_type="viral cRNA"  
/isolate="TH-CU/B11014/2014"  
/host="Homo sapiens"  
/db\_xref="taxon:208895"  
/country="Thailand"  
/collection\_date="23-Sep-2014"  
/note="group: B"

CDS <1..603

/note="G protein"  
/codon\_start=1  
/product="attachment glycoprotein"  
/protein\_id="APY20397"  
/translation="IHTNSATISPNTKSETHHTTAQTKGTTSTPTQNNKPSTKPRPKN  
PPKKDDYHFEVFNFPVPCISCGNNQLCKSICKTIPSNPKPKKPTTKPTNKPPTKTTNKR  
DPKTLAKTPKKETTINPTKKPTKPTTERDTSTPQSTVLDITTSKHTERDTSTSQSIVL  
DTTTSKHTTQQQLSYSTTPENTPNSTQTPTASEPSTSNST"

ORIGIN

1 atccacaaa actcagccac aatataccac aatacaaaat cagaaacaca ccatacaaca  
61 gcacaaacca aaggcacaac ctctactcca acacagaaca acaagccaag cacaaaacca  
121 cgtccaaaaa atccacaaa aaaagatgat taccatttg aagtgtcaa cttgttccc  
181 tgtagtatat gtggcaacaa tcaactctgc aaatccattt gcaaaacaat accaagcaat  
241 aaaccaaaga aaaaaccaac taaaaaccc acaaacaaac cacctaccaa aaccacaaac  
301 aaaagagacc caaaacact agccaaaaca ccgaaaaaag aaaccacat taaccaaca  
361 aaaaaccaa ccccaagac tacagaaaga gacaccagca cccacaate cactgtgctc  
421 gacataacca catcaaaaca cacagaaaga gacaccagca cctcacaate cattgtgctt  
481 gacacaacca catcaaaaca cacaaccaa cagcaatctc ttactcaac ccccccgaa  
541 aacacacca actccagca aacaccaca gcatccgagc ctccacatc aaattctacc

601 taa

//

LOCUS KY328057 603 bp cRNA linear VRL 13-DEC-2016  
DEFINITION Human respiratory syncytial virus B isolate TH-CU/B10808/2014  
attachment glycoprotein gene, partial cds.

ACCESSION KY328057

VERSION KY328057

KEYWORDS .

SOURCE Human respiratory syncytial virus B

ORGANISM Human respiratory syncytial virus B

Viruses; ssRNA viruses; ssRNA negative-strand viruses;  
Mononegavirales; Pneumoviridae; Orthopneumovirus.

REFERENCE 1 (bases 1 to 603)

AUTHORS Thongpan,I., Mauleekoonphairoj,J., Vichiwattana,P., Korkong,S.,  
Vongpunsawad,S. and Poovorawan,Y.

TITLE Molecular Characterization of Respiratory Syncytial Virus in  
Thailand, 2012-2015

JOURNAL Unpublished

REFERENCE 2 (bases 1 to 603)

AUTHORS Thongpan,I., Mauleekoonphairoj,J., Vichiwattana,P., Korkong,S.,  
Vongpunsawad,S. and Poovorawan,Y.

TITLE Direct Submission

JOURNAL Submitted (13-DEC-2016) Department of Pediatrics, Center of  
Excellence in Clinical Virology, Faculty of Medicine, Chulalongkorn  
University, Bangkok 10330, Thailand

COMMENT ##Assembly-Data-START##

Assembly Method :: DNASTAR-Lasergene v. 6  
Sequencing Technology :: Sanger dideoxy sequencing  
##Assembly-Data-END##

FEATURES Location/Qualifiers

source 1..603  
/organism="Human respiratory syncytial virus B"  
/mol\_type="viral cRNA"  
/isolate="TH-CU/B10808/2014"  
/host="Homo sapiens"  
/db\_xref="taxon:208895"  
/country="Thailand"  
/collection\_date="28-Aug-2014"  
/note="group: B"

CDS <1..603  
/note="G protein"  
/codon\_start=1  
/product="attachment glycoprotein"  
/protein\_id="APY20398"  
/translation="IHTNSATISPNTKSETHHTTAQTKGTTSTPTQNNKPSTKPRPKN  
PPKKDDYHFEVFNFPVCSICGNNQLCKSICKTIPSNKPKKPTTKPTNKPPTKTTNKR  
DPKTLAKTPKKETTINPTKKPTPKTTERDSTPQSTVLDITTSKHTERDSTSTSQIVL  
DTTTSKHTTQQQSLYSTTPENTPNSTQTPTASEPSTSNST"

ORIGIN

1 atccacaaa actcagccac aatatcacc aatacaaat cagaaacaca ccatacaaca  
61 gcacaaacca aaggcacaac ctctactcca acacagaaca acaagccaag cacaaaacca  
121 cgtcAAAAAA atccacaaa aaaagatgat taccatttg aagtggtcaa ctttggtccc  
181 tgtagtatat gtggcaacaa tcaactctgc aaatccattt gcaaaacaat accaagcaat  
241 aaaccaaaaga aaaaaccaac taaaaaacc acaaacaaac cacctaccaa aaccacaaac

301 aaaagagacc ccaaacact agccaaaaca ccgaaaaaag aaaccacat taaccaaca  
361 aaaaaaccaa ccccaagac tacagaaaga gacaccagca cccacaate cactgtgctc  
421 gacataacca catcaaaaca cacagaaaga gacaccagca cctcacaate cattgtgctt  
481 gacacaacca catcaaaaca cacaaccaa cagcaatctc tctactcaac cacccccgaa  
541 aacacacca actccacgca aacaccaca gcatccgagc cctccacate aaattctacc  
601 taa

//

LOCUS KY328058 597 bp cRNA linear VRL 13-DEC-2016  
DEFINITION Human respiratory syncytial virus B isolate TH-CU/C5180/2014  
attachment glycoprotein gene, partial cds.

ACCESSION KY328058

VERSION KY328058

KEYWORDS .

SOURCE Human respiratory syncytial virus B

ORGANISM Human respiratory syncytial virus B

Viruses; ssRNA viruses; ssRNA negative-strand viruses;  
Mononegavirales; Pneumoviridae; Orthopneumovirus.

REFERENCE 1 (bases 1 to 597)

AUTHORS Thongpan,I., Mauleekoonphairoj,J., Vichiwattana,P., Korkong,S.,  
Vongpunsawad,S. and Poovorawan,Y.

TITLE Molecular Characterization of Respiratory Syncytial Virus in  
Thailand, 2012-2015

JOURNAL Unpublished

REFERENCE 2 (bases 1 to 597)

AUTHORS Thongpan,I., Mauleekoonphairoj,J., Vichiwattana,P., Korkong,S.,  
Vongpunsawad,S. and Poovorawan,Y.

TITLE Direct Submission

JOURNAL Submitted (13-DEC-2016) Department of Pediatrics, Center of  
Excellence in Clinical Virology, Faculty of Medicine, Chulalongkorn  
University, Bangkok 10330, Thailand

COMMENT ##Assembly-Data-START##

Assembly Method :: DNASTAR-Lasergene v. 6  
Sequencing Technology :: Sanger dideoxy sequencing  
##Assembly-Data-END##

FEATURES Location/Qualifiers

source 1..597

/organism="Human respiratory syncytial virus B"  
/mol\_type="viral cRNA"  
/isolate="TH-CU/C5180/2014"  
/host="Homo sapiens"  
/db\_xref="taxon:208895"  
/country="Thailand"  
/collection\_date="30-Oct-2014"  
/note="group: B"

CDS <1..597

/note="G protein"  
/codon\_start=1  
/product="attachment glycoprotein"  
/protein\_id="APY20399"  
/translation="TNSATISPNTKSETHHTTAQTKGTTSTPTQNNKPSTKPRKPNP  
KKDDYHFEVFNFPVPCISCGNNQLCKSICKTIPSNKPKKPTTKPTNKPPTKTTNKRDP  
KTLAKTPKETTINPTKPKPTTTERDSTPQSTVLDITTSKHTERDSTSTSQSIALDT  
TTSKHTTQQQLYSTTPENTPNSTQTPTASEPSTSNST"

ORIGIN

1 acaaactcag ccacaatata gcccaatata aaatcagaaa cacaccatac aacagcacia  
61 accaaaggca caacctctac tccaacacag aacaacaagc caagcacaaa accacgtcca  
121 aaaaatccac caaaaaaaga tgattacat tttgaagtgt tcaactttgt tcctgtagt  
181 atatgtggca acaatcaact ctgcaaatcc attgcaaaa caataccaag caataaacca  
241 aagaaaaaac caactacaaa acccaciaaac aaaccaccta ccaaaaccac aaacaaaaga  
301 gaccccaaaa cactagccaa aacaccgaag aaagaaacca ccattaacc aacaaaaaaa  
361 ccaaccccca agactacaga aagagacacc agcacccac aatccactgt gctcgacata  
421 accacatcaa aacacacaga aagagacacc agcacctcac aatccattgc gcttgacaca  
481 accacatcaa aacacacac ccaacagcaa tctctctact caaccacccc cgaaacaca  
541 cccaactcca cacaacacc cacagcatcc gagcctcca catcaaatc tacctaa

//

LOCUS KY328059 603 bp cRNA linear VRL 13-DEC-2016  
DEFINITION Human respiratory syncytial virus B isolate TH-CU/C5066/2014  
attachment glycoprotein gene, partial cds.

ACCESSION KY328059

VERSION KY328059

KEYWORDS .

SOURCE Human respiratory syncytial virus B

ORGANISM Human respiratory syncytial virus B

Viruses; ssRNA viruses; ssRNA negative-strand viruses;  
Mononegavirales; Pneumoviridae; Orthopneumovirus.

REFERENCE 1 (bases 1 to 603)

AUTHORS Thongpan,I., Mauleekoonphairoj,J., Vichiwattana,P., Korkong,S.,  
Vongpunsawad,S. and Poovorawan,Y.

TITLE Molecular Characterization of Respiratory Syncytial Virus in  
Thailand, 2012-2015

JOURNAL Unpublished

REFERENCE 2 (bases 1 to 603)

AUTHORS Thongpan,I., Mauleekoonphairoj,J., Vichiwattana,P., Korkong,S.,  
Vongpunsawad,S. and Poovorawan,Y.

TITLE Direct Submission

JOURNAL Submitted (13-DEC-2016) Department of Pediatrics, Center of  
Excellence in Clinical Virology, Faculty of Medicine, Chulalongkorn  
University, Bangkok 10330, Thailand

COMMENT ##Assembly-Data-START##

Assembly Method :: DNASTAR-Lasergene v. 6  
Sequencing Technology :: Sanger dideoxy sequencing  
##Assembly-Data-END##

FEATURES Location/Qualifiers

source 1..603

/organism="Human respiratory syncytial virus B"  
/mol\_type="viral cRNA"  
/isolate="TH-CU/C5066/2014"  
/host="Homo sapiens"  
/db\_xref="taxon:208895"  
/country="Thailand"  
/collection\_date="10-Sep-2014"  
/note="group: B"

CDS <1..603

/note="G protein"  
/codon\_start=1  
/product="attachment glycoprotein"  
/protein\_id="APY20400"  
/translation="IHTNSATISPNTKSETHHTTAQTKGTTSTPTQNNKPSTKPRPKN

PPKKDDYHFEVFNFVPCISICGNNQLCKSICKTIPSNKPKKKPTTKPTNKPPTKTTNKR  
DPKTLAKTPKKETTINPTKKPTKTTTERDTSTPQSTVLDITTSKHTERDTSTSQSIAL  
DTTTSKHTTQQQLHSTTPENTPNSTQTPAASEPSTSNSST"

ORIGIN

1 atccacacaa actcagccac aatatacccc aatacaaaat cagaaacaca ccatacaaca  
61 gcacaaacca aaggcacaac ctctactcca acacagaaca acaagccaag cacaaaacca  
121 cgtccaaaaa atccacacaa aaaagatgat taccattttg aagtattcaa cttgttccc  
181 tgtagtatat gtggcaacaa tcaactctgc aaatccattt gcaaaacaat accaagcaat  
241 aaaccaaga aaaaaccaac tacaaaaccc acaaacaaac cacctaccaa aaccacaaac  
301 aaaagagacc ccaaaacact agccaaaaca ccgaaaaaag aaaccacat taaccaaca  
361 aaaaaaccaa ccccaagac tacagaaaga gacaccagca cccacaate cactgtgctc  
421 gacataacca catcaaaaca cacagaaaga gataccagca cctcacaatc cattgcgctt  
481 gacacaacca catcaaaaca cacaaccaa cagcaatctc tcaactcaac cacccccgaa  
541 aacacacca actccacaca aacaccgca gcatccgagc cctccacatc aaattctacc  
601 taa

//

LOCUS KY328060 603 bp cRNA linear VRL 13-DEC-2016  
DEFINITION Human respiratory syncytial virus B isolate TH-CU/C5182/2014  
attachment glycoprotein gene, partial cds.

ACCESSION KY328060

VERSION KY328060

KEYWORDS .

SOURCE Human respiratory syncytial virus B

ORGANISM Human respiratory syncytial virus B

Viruses; ssRNA viruses; ssRNA negative-strand viruses;  
Mononegavirales; Pneumoviridae; Orthopneumovirus.

REFERENCE 1 (bases 1 to 603)

AUTHORS Thongpan,I., Mauleekoonphairoj,J., Vichiwattana,P., Korkong,S.,  
Vongpunsawad,S. and Poovorawan,Y.

TITLE Molecular Characterization of Respiratory Syncytial Virus in  
Thailand, 2012-2015

JOURNAL Unpublished

REFERENCE 2 (bases 1 to 603)

AUTHORS Thongpan,I., Mauleekoonphairoj,J., Vichiwattana,P., Korkong,S.,  
Vongpunsawad,S. and Poovorawan,Y.

TITLE Direct Submission

JOURNAL Submitted (13-DEC-2016) Department of Pediatrics, Center of  
Excellence in Clinical Virology, Faculty of Medicine, Chulalongkorn  
University, Bangkok 10330, Thailand

COMMENT ##Assembly-Data-START##

Assembly Method :: DNASTAR-Lasergene v. 6  
Sequencing Technology :: Sanger dideoxy sequencing  
##Assembly-Data-END##

FEATURES Location/Qualifiers

source 1..603  
/organism="Human respiratory syncytial virus B"  
/mol\_type="viral cRNA"  
/isolate="TH-CU/C5182/2014"  
/host="Homo sapiens"  
/db\_xref="taxon:208895"  
/country="Thailand"  
/collection\_date="01-Oct-2014"  
/note="group: B"

CDS <1..603

/note="G protein"  
/codon\_start=1  
/product="attachment glycoprotein"  
/protein\_id="APY20401"  
/translation="IHTNSATISPNTKSETHHTTAQTKGTTSTPTQNNKPSTKPRPKN  
PPKKDDYHFEVFNFPVPCISCGNNQLCKSICKTIPSNKPKKKPTTKPTNKPPTKTTNKR  
DPKTLAKTPKKETTINPTKKPTPKTTERDTSTPQSTVLDITTSKHTERDTSTSQSIAL  
DTTTSKHTTQQQLHSTTPENTPNSTQTPAASEPSTSNSST"

ORIGIN

1 atccacacaa actcagccac aatatcacc aatacaaat cagaaacaca ccatacaaca  
61 gcacaaacca aaggcacaac ctctactcca acacagaaca acaagccaag cacaaaacca  
121 cgtccaaaaa atccacaaa aaaagatgat taccatttg aagtggtcaa cttgtgcc  
181 tgtagtatat gtggcaacaa tcaactctgc aaatccattt gcaaaacaat accaagcaat  
241 aaaccaaaga aaaaccaac tacaaaaccc acaacaacac cactaccaa aaccacaaac  
301 aaaagagacc ccaaacact agccaaaaca cgaaaaaag aaaccacat taaccaaca  
361 aaaaaaccaa ccccaagac tacagaaaga gacaccagca cccacaate cactgtgctc  
421 gacataacca catcaaaaca cacagaaaga gataccagca ctcacaatc cattgcgctt  
481 gacacaacca catcaaaaca cacaaccaa cagcaatctc tccactcaac caccgccgaa  
541 aacacacca actccacaca aacaccgca geatccgagc cctccacac aaattctacc  
601 taa

//

LOCUS KY328061 603 bp cRNA linear VRL 13-DEC-2016  
DEFINITION Human respiratory syncytial virus B isolate TH-CU/B10635/2014  
attachment glycoprotein gene, partial cds.

ACCESSION KY328061

VERSION KY328061

KEYWORDS .

SOURCE Human respiratory syncytial virus B

ORGANISM Human respiratory syncytial virus B

Viruses; ssRNA viruses; ssRNA negative-strand viruses;  
Mononegavirales; Pneumoviridae; Orthopneumovirus.

REFERENCE 1 (bases 1 to 603)

AUTHORS Thongpan,I., Mauleekoonphairoj,J., Vichiwattana,P., Korkong,S.,  
Vongpunsawad,S. and Poovorawan,Y.

TITLE Molecular Characterization of Respiratory Syncytial Virus in  
Thailand, 2012-2015

JOURNAL Unpublished

REFERENCE 2 (bases 1 to 603)

AUTHORS Thongpan,I., Mauleekoonphairoj,J., Vichiwattana,P., Korkong,S.,  
Vongpunsawad,S. and Poovorawan,Y.

TITLE Direct Submission

JOURNAL Submitted (13-DEC-2016) Department of Pediatrics, Center of  
Excellence in Clinical Virology, Faculty of Medicine, Chulalongkorn  
University, Bangkok 10330, Thailand

COMMENT ##Assembly-Data-START##

Assembly Method :: DNASTAR-Lasergene v. 6  
Sequencing Technology :: Sanger dideoxy sequencing  
##Assembly-Data-END##

FEATURES Location/Qualifiers

source 1..603  
/organism="Human respiratory syncytial virus B"  
/mol\_type="viral cRNA"  
/isolate="TH-CU/B10635/2014"  
/host="Homo sapiens"

/db\_xref="taxon:208895"  
/country="Thailand"  
/collection\_date="11-Aug-2014"  
/note="group: B"  
CDS <1..603  
/note="G protein"  
/codon\_start=1  
/product="attachment glycoprotein"  
/protein\_id="APY20402"  
/translation="IHTNSATISPNTKSETHHTTAQTKGTTSTPTQNNKPSTKPRPKN  
PPKKDDYHFEVFNFPVCSICGNNQLCKSICKTIPSNKPKKPTTKPTNKPPTKTTNKR  
DPKTLAKTPKKETTINPTKKPTKTTTERDTSTPQSTVLDITTSKHTERDTSTSQSIAL  
DTTTSKHTTQQQLHSTTPENTPNSTQTPAASEPSTSNSST"

ORIGIN

1 atccacaca actcagccac aatataccac aatacaaaat cagaaacaca ccatacaaca  
61 gcacaaacca aaggcacaac ctctactcca acacagaaca acaagccaag cacaaaacca  
121 cgtccaaaaa atccacaaa aaaagatgat taccatttg aagtgtcaa cttgtgcc  
181 ttagtatat gtggcaaca tcaactctgc aatccattt gcaaaacaat accaagcaat  
241 aaaccaaaaga aaaaaccaac taaaaaaccc acaaacaaac cacctaccaa aaccacaaac  
301 aaaagagacc caaaacact agccaaaaca ccgaaaaaag aaaccacat taaccaaca  
361 aaaaaaccaa cccaagac tacagaaaga gacaccagca cccacaatc cactgtgctc  
421 gacataacca catcaaaaca cacagaaaga gataccagca cctacaatc cattgcgctt  
481 gacacaacca catcaaaaca cacaaccaa cagcaatctc tccactcaac cacccecgaa  
541 aacacacca actccacaca aacaccgca gcatccgagc cctccacatc aaattctacc  
601 taa

//

LOCUS KY328062 603 bp cRNA linear VRL 13-DEC-2016  
DEFINITION Human respiratory syncytial virus B isolate TH-CU/C5239/2014  
attachment glycoprotein gene, partial cds.

ACCESSION KY328062

VERSION KY328062

KEYWORDS .

SOURCE Human respiratory syncytial virus B

ORGANISM Human respiratory syncytial virus B

Viruses; ssRNA viruses; ssRNA negative-strand viruses;  
Mononegavirales; Pneumoviridae; Orthopneumovirus.

REFERENCE 1 (bases 1 to 603)

AUTHORS Thongpan,I., Mauleekoonphairoj,J., Vichiwattana,P., Korkong,S.,  
Vongpunsawad,S. and Poovorawan,Y.

TITLE Molecular Characterization of Respiratory Syncytial Virus in  
Thailand, 2012-2015

JOURNAL Unpublished

REFERENCE 2 (bases 1 to 603)

AUTHORS Thongpan,I., Mauleekoonphairoj,J., Vichiwattana,P., Korkong,S.,  
Vongpunsawad,S. and Poovorawan,Y.

TITLE Direct Submission

JOURNAL Submitted (13-DEC-2016) Department of Pediatrics, Center of  
Excellence in Clinical Virology, Faculty of Medicine, Chulalongkorn  
University, Bangkok 10330, Thailand

COMMENT ##Assembly-Data-START##

Assembly Method :: DNASTAR-Lasergene v. 6  
Sequencing Technology :: Sanger dideoxy sequencing  
##Assembly-Data-END##

FEATURES Location/Qualifiers



source 1..603  
 /organism="Human respiratory syncytial virus B"  
 /mol\_type="viral cRNA"  
 /isolate="TH-CU/C5239/2014"  
 /host="Homo sapiens"  
 /db\_xref="taxon:208895"  
 /country="Thailand"  
 /collection\_date="01-Nov-2014"  
 /note="group: B"

CDS <1..603  
 /note="G protein"  
 /codon\_start=1  
 /product="attachment glycoprotein"  
 /protein\_id="APY20403"  
 /translation="IHTNSATISPNTKSETHHTTAQTKGTTSTPTQNNKPSTKPRPKN  
 PPKKDDYHFEVFNFPVCSICGNNQLCKSICKTIPSNKPKKKPTTKPTNKPPTKTTNKR  
 DPKTLAKTPKKETTINPTKKPTPKTTERDTSTPQSTVLDITTSKHTERDTSTSQSIAL  
 DTTTSKHTTQQQLHSTTPENTPNSTQTPAASEPSTSNST"

ORIGIN

1 atccacacaa actcagccac aatataccac aatacaaaat cagaaacaca ccatacaaca  
 61 gcacaaacca aaggcacaac ctctactcca acacagaaca acaagccaag cacaaaacca  
 121 cgtccaaaaa atccacaaa aaaagatgat taccatttg aagtgtcaa cttgttccc  
 181 tgtagtatat gtggcaacaa tcaactctgc aaatccattt gcaaaacaat accaagcaat  
 241 aaaccaaaaga aaaaaccaac tacaaaaccc acaaacaaac cacctaccaa aaccacaaac  
 301 aaaagagacc caaaacact agccaaaaca ccgaaaaaag aaaccacat taaccaaca  
 361 aaaaaccaa ccccaagac tacagaaaga gacaccagca cccacaate cactgtgctc  
 421 gacataacca catcaaaaca cacagaaaga gataccagca cctcacaate cattgcgctt  
 481 gacacaacca catcaaaaca cacaaccaa cagcaatctc tccactcaac cacccecgaa  
 541 aacacacca actccacaca aacaccgca geatccgagc cctccacatc aaattetacc  
 601 taa

//

LOCUS KY328063 603 bp cRNA linear VRL 13-DEC-2016

DEFINITION Human respiratory syncytial virus B isolate TH-CU/C5205/2014  
 attachment glycoprotein gene, partial cds.

ACCESSION KY328063

VERSION KY328063

KEYWORDS .

SOURCE Human respiratory syncytial virus B

ORGANISM Human respiratory syncytial virus B

Viruses; ssRNA viruses; ssRNA negative-strand viruses;  
 Mononegavirales; Pneumoviridae; Orthopneumovirus.

REFERENCE 1 (bases 1 to 603)

AUTHORS Thongpan,I., Mauleekoonphairoj,J., Vichiwattana,P., Korkong,S.,  
 Vongpunsawad,S. and Poovorawan,Y.

TITLE Molecular Characterization of Respiratory Syncytial Virus in  
 Thailand, 2012-2015

JOURNAL Unpublished

REFERENCE 2 (bases 1 to 603)

AUTHORS Thongpan,I., Mauleekoonphairoj,J., Vichiwattana,P., Korkong,S.,  
 Vongpunsawad,S. and Poovorawan,Y.

TITLE Direct Submission

JOURNAL Submitted (13-DEC-2016) Department of Pediatrics, Center of  
 Excellence in Clinical Virology, Faculty of Medicine, Chulalongkorn  
 University, Bangkok 10330, Thailand

COMMENT ##Assembly-Data-START##

Assembly Method :: DNASTAR-Lasergene v. 6  
Sequencing Technology :: Sanger dideoxy sequencing  
##Assembly-Data-END##

FEATURES Location/Qualifiers

source 1..603  
/organism="Human respiratory syncytial virus B"  
/mol\_type="viral cRNA"  
/isolate="TH-CU/C5205/2014"  
/host="Homo sapiens"  
/db\_xref="taxon:208895"  
/country="Thailand"  
/collection\_date="01-Oct-2014"  
/note="group: B"

CDS <1..603  
/note="G protein"  
/codon\_start=1  
/product="attachment glycoprotein"  
/protein\_id="APY20404"  
/translation="IHTNSATISPNTKSETHHTTAQTKGTTSTPTQNNKPSTKPRPKN  
PPKKDDYHFEVFNFPVCSICGNNQLCKSICKTIPSNKPKKKPTTKPTNKPPTKTTNKR  
DPKTLAKTPKKETTINPTKKPTPKTTERDTSTPQSTVLDITTSKHTERDTSTSQSIVP  
DTTTSKHTTQQQLHSTTPENTPNSTQTPTASEPSTSNST"

ORIGIN

1 atccacaaa actcagccac aatataccac aatacaaaat cagaaacaca ccatacaaca  
61 gcacaaacca aaggcacaac ctctactcca acacagaaca acaagccaag cacaaaacca  
121 cgtccaaaaa atccacaaa aaaagatgat taccatttg aagtgtcaa cttgttccc  
181 tgtagtatat gtggcaacaa tcaactctgc aaatccattt gcaaaacaat accaagcaat  
241 aaaccaaaga aaaaaccaac tacaaaaccc acaaacaaac cacctaccaa aaccacaaac  
301 aaaagagacc ccaaaacact agccaaaaca ccgaaaaaag aaaccacat taaccaaca  
361 aaaaaaccaa ccccaagac tacagaaaga gacaccagca cccacaate cactgtgcta  
421 gacataacca catcaaaaca cacagaaaga gacaccagca cctcacaate cattgtgccc  
481 gacacaacca catcaaaaca cacaaccaa cagcaatctc tcaactcaac cacccccgaa  
541 aacacacca actccagca aacaccaca gcatccgagc cctccacatc aaattctacc  
601 taa

//

LOCUS KY328064 603 bp cRNA linear VRL 13-DEC-2016  
DEFINITION Human respiratory syncytial virus B isolate TH-CU/C5212/2014  
attachment glycoprotein gene, partial cds.

ACCESSION KY328064

VERSION KY328064

KEYWORDS .

SOURCE Human respiratory syncytial virus B

ORGANISM Human respiratory syncytial virus B

Viruses; ssRNA viruses; ssRNA negative-strand viruses;  
Mononegavirales; Pneumoviridae; Orthopneumovirus.

REFERENCE 1 (bases 1 to 603)

AUTHORS Thongpan,I., Mauleekoonphairoj,J., Vichiwattana,P., Korkong,S.,  
Vongpunsawad,S. and Poovorawan,Y.

TITLE Molecular Characterization of Respiratory Syncytial Virus in  
Thailand, 2012-2015

JOURNAL Unpublished

REFERENCE 2 (bases 1 to 603)

AUTHORS Thongpan,I., Mauleekoonphairoj,J., Vichiwattana,P., Korkong,S.,

Vongpunsawad,S. and Poovorawan,Y.

TITLE Direct Submission

JOURNAL Submitted (13-DEC-2016) Department of Pediatrics, Center of Excellence in Clinical Virology, Faculty of Medicine, Chulalongkorn University, Bangkok 10330, Thailand

COMMENT ##Assembly-Data-START##

Assembly Method :: DNASTAR-Lasergene v. 6  
Sequencing Technology :: Sanger dideoxy sequencing  
##Assembly-Data-END##

FEATURES Location/Qualifiers

source 1..603  
/organism="Human respiratory syncytial virus B"  
/mol\_type="viral cRNA"  
/isolate="TH-CU/C5212/2014"  
/host="Homo sapiens"  
/db\_xref="taxon:208895"  
/country="Thailand"  
/collection\_date="01-Nov-2014"  
/note="group: B"

CDS <1..603  
/note="G protein"  
/codon\_start=1  
/product="attachment glycoprotein"  
/protein\_id="APY20405"  
/translation="IHTNSATISPNTKSETHHTTAQTKGTTSTPTQNNKPSTKPRPKN  
PPKKDDYHFEVFNFPVPCISCGNNQLCKSICKTIPSNPKPKKPTTKPTNKPPTKTTNKR  
DPKTLAKTPKKETTINPTKKPTKTTTERDTSTPQSTVLDITTSKHTERDTSTSQSIVP  
DTTTSKHTTQQQLHSTTPENTPNSTQTPTASEPSTSNST"

ORIGIN

1 atccacacaa actcagccac aatatcacc aatacaaat cagaaacaca ccatacaaca  
61 gcacaaacca aaggcacaac ctctactcca acacagaaca acaagccaag cacaaaacca  
121 cgtccaaaaa atccacaaa aaaagatgat taccatttg aagtgtcaa cttgtgcc  
181 tgtagtatat gtggcaacaa tcaactctgc aaatccattt gcaaaacaat accaagcaat  
241 aaaccaaaga aaaaaccaac tacaaaaccc acaaaaaaac cacctaccaa aaccacaaac  
301 aaaagagacc ccaaaacact agccaaaaca cggaaaaaag aaaccacat taaccaaca  
361 aaaaaaccaa ccccaagac tacagaaaga gacaccagca cccacaatc cactgtgcta  
421 gacataacca catcaaaaca cacagaaaga gacaccagca ctcacaatc cattgtgcc  
481 gacacaacca catcaaaaca cacacccaa cagcaatctc tccactcaac caccgccgaa  
541 aacacacca actccagca aacaccaca gcatccgagc cctccacatc aaattctacc  
601 taa

//

LOCUS KY328065 603 bp cRNA linear VRL 13-DEC-2016

DEFINITION Human respiratory syncytial virus B isolate TH-CU/B12236/2015  
attachment glycoprotein gene, partial cds.

ACCESSION KY328065

VERSION KY328065

KEYWORDS .

SOURCE Human respiratory syncytial virus B

ORGANISM Human respiratory syncytial virus B  
Viruses; ssRNA viruses; ssRNA negative-strand viruses;  
Mononegavirales; Pneumoviridae; Orthopneumovirus.

REFERENCE 1 (bases 1 to 603)

AUTHORS Thongpan,I., Mauleekoonphairoj,J., Vichiwattana,P., Korkong,S.,  
Vongpunsawad,S. and Poovorawan,Y.

TITLE Molecular Characterization of Respiratory Syncytial Virus in  
Thailand, 2012-2015  
JOURNAL Unpublished  
REFERENCE 2 (bases 1 to 603)  
AUTHORS Thongpan,I., Mauleekoonphairoj,J., Vichiwattana,P., Korkong,S.,  
Vongpunsawad,S. and Poovorawan,Y.

TITLE Direct Submission  
JOURNAL Submitted (13-DEC-2016) Department of Pediatrics, Center of  
Excellence in Clinical Virology, Faculty of Medicine, Chulalongkorn  
University, Bangkok 10330, Thailand

COMMENT ##Assembly-Data-START##  
Assembly Method :: DNASTAR-Lasergene v. 6  
Sequencing Technology :: Sanger dideoxy sequencing  
##Assembly-Data-END##

FEATURES Location/Qualifiers

source 1..603  
/organism="Human respiratory syncytial virus B"  
/mol\_type="viral cRNA"  
/isolate="TH-CU/B12236/2015"  
/host="Homo sapiens"  
/db\_xref="taxon:208895"  
/country="Thailand"  
/collection\_date="12-Jul-2015"  
/note="group: B"

CDS <1..603  
/note="G protein"  
/codon\_start=1  
/product="attachment glycoprotein"  
/protein\_id="APY20406"  
/translation="IHTNSATISPNTKSETHHTTAQTKGTTSTPTQNNKPSTKPRPKN  
PPKKDDYHFEVFNFPVPCISICGNNQLCKSICKTIPSNKPKKKPTTKPTNKPPTKTTNKR  
DPKTLAKTPKKETTINPTKKPTPKTTERDSSTPQSTVLDITTSKHTERDTSTSQSIAL  
DTTTSKHTTQQQSLYSTTPENTPNSTQTPTASEPSTSNST"

ORIGIN

1 atccacacaa actcagccac aatataccac aatacaaaat cagaaacaca ccatacaaca  
61 gcacaaacca aaggcacaac ctctactcca acacagaaca acaagccaag cacaaaacca  
121 cgtccaaaaa atccacaaa aaaagatgat taccatttg aagtgtcaa cttgtgcc  
181 ttagtatat gtggcaacaa tcaactttgc aatccattt gcaaaacaat accaagcaat  
241 aaaccaaaaga aaaaaccaac taaaaaaccc acaaacaaac cacctaccaa aaccacaaac  
301 aaaagggacc caaaacact agccaaaaca ccgaaaaaag aaaccacat taaccaaca  
361 aaaaaaccaa ccccaagac tacagaaaga gactccagca cccacaatc cactgtgctc  
421 gacataacca catcaaaaca cacagaaaga gacaccagca cctcacaatc cattgcgctt  
481 gacacaacca catcaaaaca cacaaccaa cagcaatctc tctactcaac cacccccgaa  
541 aacacacca actccagca aacaccaca gcatccgagc cctccacatc aaattctacc  
601 taa

//

LOCUS KY328066 603 bp cRNA linear VRL 13-DEC-2016  
DEFINITION Human respiratory syncytial virus B isolate TH-CU/B12411/2015  
attachment glycoprotein gene, partial cds.

ACCESSION KY328066

VERSION KY328066

KEYWORDS .

SOURCE Human respiratory syncytial virus B

ORGANISM Human respiratory syncytial virus B

Viruses; ssRNA viruses; ssRNA negative-strand viruses;  
Mononegavirales; Pneumoviridae; Orthopneumovirus.

REFERENCE 1 (bases 1 to 603)

AUTHORS Thongpan,I., Mauleekoonphairoj,J., Vichiwattana,P., Korkong,S.,  
Vongpunsawad,S. and Poovorawan,Y.

TITLE Molecular Characterization of Respiratory Syncytial Virus in  
Thailand, 2012-2015

JOURNAL Unpublished

REFERENCE 2 (bases 1 to 603)

AUTHORS Thongpan,I., Mauleekoonphairoj,J., Vichiwattana,P., Korkong,S.,  
Vongpunsawad,S. and Poovorawan,Y.

TITLE Direct Submission

JOURNAL Submitted (13-DEC-2016) Department of Pediatrics, Center of  
Excellence in Clinical Virology, Faculty of Medicine, Chulalongkorn  
University, Bangkok 10330, Thailand

COMMENT ##Assembly-Data-START##

Assembly Method :: DNASTAR-Lasergene v. 6  
Sequencing Technology :: Sanger dideoxy sequencing  
##Assembly-Data-END##

FEATURES Location/Qualifiers

source 1..603  
/organism="Human respiratory syncytial virus B"  
/mol\_type="viral cRNA"  
/isolate="TH-CU/B12411/2015"  
/host="Homo sapiens"  
/db\_xref="taxon:208895"  
/country="Thailand"  
/collection\_date="23-Jul-2015"  
/note="group: B"

CDS <1..603  
/note="G protein"  
/codon\_start=1  
/product="attachment glycoprotein"  
/protein\_id="APY20407"  
/translation="IHTNSATISPNTKSETHHTTAQTKGTTSTPTQNNKPSTKPRPKN  
PPKKDDYHFEVFNFVPCSICGNNQLCKSICKTIPSNKPKKPTTKPTNKPPTKTTNKR  
DPKTLAKTPKKETTINPTKKPTPKTTERDSSTPQSTVLDITTSKHTERDTSTSQSIAL  
DTTTSKHTTQQQSLYSTTPENTPNSTQTPTASEPSTSNST"

ORIGIN

1 atccacaaa actcagccac aatatcacc aatacaaat cagaaacaca ccatacaaca  
61 gcacaaacca aaggcacaac ctctactcca acacagaaca acaagccaag cacaaaacca  
121 cgtccaaaa atccacaaa aaaagatgat taccatttg aagtgtcaa cttgttccc  
181 ttagtatat gtggcaaca tcaacttgc aatccatt gcaaaacaat accaagcaat  
241 aaaccaaaaga aaaaaccaac taaaaaacc acaaaacaac cacctaccaa aaccacaaac  
301 aaaagggacc caaaacact agccaaaaca ccgaaaaag aaaccacat taaccaaca  
361 aaaaaacca ccccaagac tacagaaaga gactccagca cccacaate cactgtgctc  
421 gacataacca catcaaaaca cacagaaaga gacaccagca cctcacaate cattgcgett  
481 gacacaacca catcaaaaca cacaaccaa cagcaatctc tctactcaac cacccccgaa  
541 aacacacca actccagca aacaccaca gcatccgagc cctccacate aaattctacc  
601 taa

//

LOCUS KY328067 603 bp cRNA linear VRL 13-DEC-2016  
DEFINITION Human respiratory syncytial virus B isolate TH-CU/B12543/2015  
attachment glycoprotein gene, partial cds.

ACCESSION KY328067

VERSION KY328067

KEYWORDS .

SOURCE Human respiratory syncytial virus B

ORGANISM Human respiratory syncytial virus B

Viruses; ssRNA viruses; ssRNA negative-strand viruses;  
Mononegavirales; Pneumoviridae; Orthopneumovirus.

REFERENCE 1 (bases 1 to 603)

AUTHORS Thongpan,I., Mauleekoonphairoj,J., Vichiwattana,P., Korkong,S.,  
Vongpunsawad,S. and Poovorawan,Y.

TITLE Molecular Characterization of Respiratory Syncytial Virus in  
Thailand, 2012-2015

JOURNAL Unpublished

REFERENCE 2 (bases 1 to 603)

AUTHORS Thongpan,I., Mauleekoonphairoj,J., Vichiwattana,P., Korkong,S.,  
Vongpunsawad,S. and Poovorawan,Y.

TITLE Direct Submission

JOURNAL Submitted (13-DEC-2016) Department of Pediatrics, Center of  
Excellence in Clinical Virology, Faculty of Medicine, Chulalongkorn  
University, Bangkok 10330, Thailand

COMMENT ##Assembly-Data-START##

Assembly Method :: DNASTAR-Lasergene v. 6  
Sequencing Technology :: Sanger dideoxy sequencing  
##Assembly-Data-END##

FEATURES Location/Qualifiers

source 1..603

/organism="Human respiratory syncytial virus B"  
/mol\_type="viral cRNA"  
/isolate="TH-CU/B12543/2015"  
/host="Homo sapiens"  
/db\_xref="taxon:208895"  
/country="Thailand"  
/collection\_date="11-Aug-2015"  
/note="group: B"

CDS <1..603

/note="G protein"  
/codon\_start=1  
/product="attachment glycoprotein"  
/protein\_id="APY20408"  
/translation="IHTNSATISPNTKSETHHTTAQTKGTTSTPTQNNKPSTKPRPKN  
PPKKDDYHFEVFNFPVCSICGNNQLCKSICKTIPSNPKPKKPTTKPTNKPPTKTTNKR  
DPKTLAKTPKKETTINPTKKPTKPTTERDSSSTPQSTVLDITTSKHTERDTSTSQSIAL  
DTTTSKHTTQQQLSYSTTPENTPNSTQTPTASEPSTSNST"

ORIGIN

1 atccacaaa actcagccac aatataccac aatacaaaat cagaaacaca ccatacaaca  
61 gcacaaacca aaggcacaac ctctactcca acacagaaca acaagccaag cacaaaacca  
121 cgtccaaaaa atccacaaa aaaagatgat taccatttg aagtgtcaa cttgttccc  
181 ttagtatat gtggcaacaa tcaacttgc aaatccatt gcaaaacaat accaagcaat  
241 aaaccaaga aaaaaccaac tacaaaacc acaaacaaac cacctacaa aaccacaaac  
301 aaaagggacc caaaacact agccaaaaca ccgaaaaaag aaaccacat taaccaaca  
361 aaaaaccaa ccccaagac tacagaaaga gactccagca cccacaate cactgtgctc  
421 gacataacca catcaaaaca cacagaaaga gacaccagca cctcacaate cattgcgctt  
481 gacacaacca catcaaaaca cacaaccaa cagcaatctc ttactcaac ccccccgaa  
541 aacacacca actccagca aacaccaca gcatccgagc ctccacatc aaattctacc

601 taa

//

LOCUS KY328068 603 bp cRNA linear VRL 13-DEC-2016  
DEFINITION Human respiratory syncytial virus B isolate TH-CU/B12474/2015  
attachment glycoprotein gene, partial cds.

ACCESSION KY328068

VERSION KY328068

KEYWORDS .

SOURCE Human respiratory syncytial virus B

ORGANISM Human respiratory syncytial virus B

Viruses; ssRNA viruses; ssRNA negative-strand viruses;  
Mononegavirales; Pneumoviridae; Orthopneumovirus.

REFERENCE 1 (bases 1 to 603)

AUTHORS Thongpan,I., Mauleekoonphairoj,J., Vichiwattana,P., Korkong,S.,  
Vongpunsawad,S. and Poovorawan,Y.

TITLE Molecular Characterization of Respiratory Syncytial Virus in  
Thailand, 2012-2015

JOURNAL Unpublished

REFERENCE 2 (bases 1 to 603)

AUTHORS Thongpan,I., Mauleekoonphairoj,J., Vichiwattana,P., Korkong,S.,  
Vongpunsawad,S. and Poovorawan,Y.

TITLE Direct Submission

JOURNAL Submitted (13-DEC-2016) Department of Pediatrics, Center of  
Excellence in Clinical Virology, Faculty of Medicine, Chulalongkorn  
University, Bangkok 10330, Thailand

COMMENT ##Assembly-Data-START##

Assembly Method :: DNASTAR-Lasergene v. 6  
Sequencing Technology :: Sanger dideoxy sequencing  
##Assembly-Data-END##

FEATURES Location/Qualifiers

source 1..603

/organism="Human respiratory syncytial virus B"  
/mol\_type="viral cRNA"  
/isolate="TH-CU/B12474/2015"  
/host="Homo sapiens"  
/db\_xref="taxon:208895"  
/country="Thailand"  
/collection\_date="04-Aug-2015"  
/note="group: B"

CDS <1..603

/note="G protein"  
/codon\_start=1  
/product="attachment glycoprotein"  
/protein\_id="APY20409"  
/translation="IHTNSATISPNTKSETHHTTAQTKGTTSTPTQNNKPSTKPRPKN  
PPKKDDYHFEVFNFPVCSICGNNQLCKSICKTIPSNKPKKPTTKPTNKPPTKTTNKR  
DPKTLAKTPKKETTINPTKKPTPKTTERDSSTPQSTLLDITTSKHTERDTSTSQSIAL  
DTTTSKHTTQQQSLYSTTPENTPNSTQTPTASEPSTSNST"

ORIGIN

1 atccacaaa actcagccac aatatcacc aatacaaat cagaaacgca ccatacaaca  
61 gcacaaacca aaggcacaac ctctactcca acacagaaca acaagccaag cacaaaacca  
121 cgtcctaaaa atccacaaa aaaagatgat taccatttg aagtggtcaa cttgtgcc  
181 tgtagtatat gtggcaaca tcaacttgc aatccattt gcaaaacaat accaagcaat  
241 aaaccaaga aaaaccaac taaaaaccc acaacaacac cacctaccaa aaccacaaac

301 aaaagggacc ccaaacact agccaaaaca ccgaaaaaag aaaccacat taaccaaca  
361 aaaaaaccaa ccccaagac tacagaaaga gactccagca cccacaatc cactctgctc  
421 gacataacca catcaaaaca cacagaaaga gacaccagca cctcacaatc cattgctt  
481 gacacaacca catcaaaaca cacaaccaa cagcaatctc tctactcaac cacccccgaa  
541 aacacacca actccagcga aacaccaca gcatccgagc cctccacatc aaattctacc  
601 taa

//

LOCUS KY328069 603 bp cRNA linear VRL 13-DEC-2016  
DEFINITION Human respiratory syncytial virus B isolate TH-CU/B12487/2015  
attachment glycoprotein gene, partial cds.

ACCESSION KY328069

VERSION KY328069

KEYWORDS .

SOURCE Human respiratory syncytial virus B

ORGANISM Human respiratory syncytial virus B

Viruses; ssRNA viruses; ssRNA negative-strand viruses;  
Mononegavirales; Pneumoviridae; Orthopneumovirus.

REFERENCE 1 (bases 1 to 603)

AUTHORS Thongpan,I., Mauleekoonphairoj,J., Vichiwattana,P., Korkong,S.,  
Vongpunsawad,S. and Poovorawan,Y.

TITLE Molecular Characterization of Respiratory Syncytial Virus in  
Thailand, 2012-2015

JOURNAL Unpublished

REFERENCE 2 (bases 1 to 603)

AUTHORS Thongpan,I., Mauleekoonphairoj,J., Vichiwattana,P., Korkong,S.,  
Vongpunsawad,S. and Poovorawan,Y.

TITLE Direct Submission

JOURNAL Submitted (13-DEC-2016) Department of Pediatrics, Center of  
Excellence in Clinical Virology, Faculty of Medicine, Chulalongkorn  
University, Bangkok 10330, Thailand

COMMENT ##Assembly-Data-START##

Assembly Method :: DNASTAR-Lasergene v. 6  
Sequencing Technology :: Sanger dideoxy sequencing  
##Assembly-Data-END##

FEATURES Location/Qualifiers

source 1..603

/organism="Human respiratory syncytial virus B"  
/mol\_type="viral cRNA"  
/isolate="TH-CU/B12487/2015"  
/host="Homo sapiens"  
/db\_xref="taxon:208895"  
/country="Thailand"  
/collection\_date="05-Aug-2015"  
/note="group: B"

CDS <1..603

/note="G protein"  
/codon\_start=1  
/product="attachment glycoprotein"  
/protein\_id="APY20410"  
/translation="IHTNSATISPNTKSETHHTTAQTKGTTSTPTQNNKPSTKPRPKN  
PPKKDDYHFEVFNFPVCSICGNNQLCKSICKTIPSNKPKKPTTKPTNKPPTKTTNKR  
DPKTLAKTPKKETTINPTKKPTPKTTERDSSTPQSTLLDITTSKHTERDTSTSQSIAL  
DTTTSKHTTQQQSLYSTTPENTPNSTQTPTASEPSTSNST"

ORIGIN



1 atccacaaa actcagccac aatatacccc aatacaaaat cagaaacgca ccatacaaca  
61 gcacaaacca aaggcacaac ctctactcca acacagaaca acaagccaag cacaaaacca  
121 cgtccaaaaa atccacaaa aaaagatgat taccatttg aagtgtcaa cttgttccc  
181 tgtagtatat gtggcaacaa tcaactttgc aaatccatt gcaaaacaat accaagcaat  
241 aaaccaaga aaaaaccaac tacaaaaccc acaacaacac cacctaccaa aaccacaaac  
301 aaaagggacc caaaacact agccaaaaca cggaaaaaag aaaccacat taaccaaca  
361 aaaaaaccaa ccccaagac tacagaaaga gactccagca cccacaate cactctgctc  
421 gacataacca catcaaaaca cacagaaaga gacaccagca cctcacaate cattcgctt  
481 gacacaacca catcaaaaca cacaaccaa cagcaatctc tctactcaac cacccccgaa  
541 aacacacca actccagca aacaccaca gcatccgagc cctccacatc aaattctacc  
601 taa

//

LOCUS KY328070 603 bp cRNA linear VRL 13-DEC-2016  
DEFINITION Human respiratory syncytial virus B isolate TH-CU/B12719/2015  
attachment glycoprotein gene, partial cds.

ACCESSION KY328070

VERSION KY328070

KEYWORDS .

SOURCE Human respiratory syncytial virus B

ORGANISM Human respiratory syncytial virus B

Viruses; ssRNA viruses; ssRNA negative-strand viruses;  
Mononegavirales; Pneumoviridae; Orthopneumovirus.

REFERENCE 1 (bases 1 to 603)

AUTHORS Thongpan,I., Mauleekoonphairoj,J., Vichiwattana,P., Korkong,S.,  
Vongpunsawad,S. and Poovorawan,Y.

TITLE Molecular Characterization of Respiratory Syncytial Virus in  
Thailand, 2012-2015

JOURNAL Unpublished

REFERENCE 2 (bases 1 to 603)

AUTHORS Thongpan,I., Mauleekoonphairoj,J., Vichiwattana,P., Korkong,S.,  
Vongpunsawad,S. and Poovorawan,Y.

TITLE Direct Submission

JOURNAL Submitted (13-DEC-2016) Department of Pediatrics, Center of  
Excellence in Clinical Virology, Faculty of Medicine, Chulalongkorn  
University, Bangkok 10330, Thailand

COMMENT ##Assembly-Data-START##

Assembly Method :: DNASTAR-Lasergene v. 6  
Sequencing Technology :: Sanger dideoxy sequencing  
##Assembly-Data-END##

FEATURES Location/Qualifiers

source 1..603  
/organism="Human respiratory syncytial virus B"  
/mol\_type="viral cRNA"  
/isolate="TH-CU/B12719/2015"  
/host="Homo sapiens"  
/db\_xref="taxon:208895"  
/country="Thailand"  
/collection\_date="25-Aug-2015"  
/note="group: B"

CDS <1..603  
/note="G protein"  
/codon\_start=1  
/product="attachment glycoprotein"  
/protein\_id="APY20411"

/translation="IHTNSATISPNTKSETHHTTAQTKGTTSTPTQNNKPSTKPRPKN  
PPKKDDYHFEVFNFPVPCISGNNQLCKSICKTIPSNKPKKKPTTKPTNKPPTKTTNKR  
DPKTLAKTPKKENTINPTKKPTKTTTERDTSTPQSTVLDITTSKHTERDTSTSQSIAL  
DTTTSKHTTQQQSLYSTTPENTPNSTQTPTASEPSTSNST"

ORIGIN

1 atccacacaa actcagccac aatatcacc aatacaaat cagaaacaca ccatacaaca  
61 gcacaaacca aaggcacaac ctctactcca acacagaaca acaagccaag cacaaaacca  
121 cgtccaaaaa atccacaaa aaaagatgat taccatttg aagtgtcaa cttgttccc  
181 tgtagtatat gtggcaacaa tcaactctgc aaatccattt gcaaaacaat accaagcaat  
241 aaaccaaaaga aaaaaccaac tacaaaaccc acaaaacaac cacctaccaa aactacaaac  
301 aaaagagacc ccaaaacact agccaagaca ccgaaaaaag aaaacacat taaccaaca  
361 aaaaaaccaa cccccaagac tacagaaaga gacaccagca cccacaatc cactgtgctc  
421 gacataacca catcaaaaca cacagaaaga gacaccagca cctcacaatc cattgctt  
481 gacacaacca catcaaaaca cacacccaa cagcaatctc tctactcaac ccccccgaa  
541 aacacacca actccacaca aacaccaca geatccgagc cctccacatc aaattctacc  
601 taa

//

LOCUS KY328071 603 bp cRNA linear VRL 13-DEC-2016  
DEFINITION Human respiratory syncytial virus B isolate TH-CU/B12619/2015  
attachment glycoprotein gene, partial cds.

ACCESSION KY328071

VERSION KY328071

KEYWORDS .

SOURCE Human respiratory syncytial virus B

ORGANISM Human respiratory syncytial virus B

Viruses; ssRNA viruses; ssRNA negative-strand viruses;  
Mononegavirales; Pneumoviridae; Orthopneumovirus.

REFERENCE 1 (bases 1 to 603)

AUTHORS Thongpan,I., Mauleekoonphairoj,J., Vichiwattana,P., Korkong,S.,  
Vongpunsawad,S. and Poovorawan,Y.

TITLE Molecular Characterization of Respiratory Syncytial Virus in  
Thailand, 2012-2015

JOURNAL Unpublished

REFERENCE 2 (bases 1 to 603)

AUTHORS Thongpan,I., Mauleekoonphairoj,J., Vichiwattana,P., Korkong,S.,  
Vongpunsawad,S. and Poovorawan,Y.

TITLE Direct Submission

JOURNAL Submitted (13-DEC-2016) Department of Pediatrics, Center of  
Excellence in Clinical Virology, Faculty of Medicine, Chulalongkorn  
University, Bangkok 10330, Thailand

COMMENT ##Assembly-Data-START##

Assembly Method :: DNASTAR-Lasergene v. 6  
Sequencing Technology :: Sanger dideoxy sequencing  
##Assembly-Data-END##

FEATURES Location/Qualifiers

source 1..603  
/organism="Human respiratory syncytial virus B"  
/mol\_type="viral cRNA"  
/isolate="TH-CU/B12619/2015"  
/host="Homo sapiens"  
/db\_xref="taxon:208895"  
/country="Thailand"  
/collection\_date="13-Aug-2015"  
/note="group: B"

CDS <1..603  
/note="G protein"  
/codon\_start=1  
/product="attachment glycoprotein"  
/protein\_id="APY20412"  
/translation="IHTNSTTISPNTKSETHHTTAQTKGTTSTPTQNNKPSTKPRPKN  
PPKKDDYHFEVFNFVPCSIGNNQLCKSICKTIPSNKPKKKPTTKPTNKPPTKTTNKR  
DPKTLAKTPKKENTINPTKKPTPKTTERDTSTPQSTVLDITTSKHTERDTSTSQSIAL  
DTTTSKHTTQQQSLYSTTPENTPNSTQTPTASEPSTSNST"

ORIGIN

1 atccacacaa actcaaccac aatatcacc aatacaaaat cagaaacaca ccatacaaca  
61 gcacaaacca aaggcacaac ctctactcca acacagaaca acaagccaag cacaaaaacca  
121 cgtccaaaaa atccacaaa aaaagatgat taccatttg aagtgtcaa cttgtgcc  
181 tgtagtatat gtggcaacaa tcaactctgc aatccatct gcaaaacaat accaagcaat  
241 aaaccaaaaga aaaaaccaac taaaaaacc acaacaacac cacctaccaa aactacaaac  
301 aaaagagacc ccaaaacact agccaaaaca ccgaaaaaag aaaacacat taaccaaca  
361 aaaaaaccaa ccccaagac tacagaaaga gacaccagca cccacaatc cactgtgctc  
421 gacataacca catcaaaaca cacagaaaga gacaccagca ctcacaatc cattgcgctt  
481 gacacaacca catcaaaaca cacaaccaa cagcaatctc tctactcaac cacccccgaa  
541 aacacacca actccacaca aacaccaca gcatccgagc cctccacatc aaattctacc  
601 taa

//

LOCUS KY328072 603 bp cRNA linear VRL 13-DEC-2016  
DEFINITION Human respiratory syncytial virus B isolate TH-CU/B12626/2015  
attachment glycoprotein gene, partial cds.

ACCESSION KY328072

VERSION KY328072

KEYWORDS .

SOURCE Human respiratory syncytial virus B

ORGANISM Human respiratory syncytial virus B

Viruses; ssRNA viruses; ssRNA negative-strand viruses;  
Mononegavirales; Pneumoviridae; Orthopneumovirus.

REFERENCE 1 (bases 1 to 603)

AUTHORS Thongpan,I., Mauleekoonphairoj,J., Vichiwattana,P., Korkong,S.,  
Vongpunsawad,S. and Poovorawan,Y.

TITLE Molecular Characterization of Respiratory Syncytial Virus in  
Thailand, 2012-2015

JOURNAL Unpublished

REFERENCE 2 (bases 1 to 603)

AUTHORS Thongpan,I., Mauleekoonphairoj,J., Vichiwattana,P., Korkong,S.,  
Vongpunsawad,S. and Poovorawan,Y.

TITLE Direct Submission

JOURNAL Submitted (13-DEC-2016) Department of Pediatrics, Center of  
Excellence in Clinical Virology, Faculty of Medicine, Chulalongkorn  
University, Bangkok 10330, Thailand

COMMENT ##Assembly-Data-START##

Assembly Method :: DNASTAR-Lasergene v. 6  
Sequencing Technology :: Sanger dideoxy sequencing  
##Assembly-Data-END##

FEATURES Location/Qualifiers

source 1..603  
/organism="Human respiratory syncytial virus B"  
/mol\_type="viral cRNA"  
/isolate="TH-CU/B12626/2015"

/host="Homo sapiens"  
/db\_xref="taxon:208895"  
/country="Thailand"  
/collection\_date="14-Aug-2015"  
/note="group: B"  
CDS <1..603  
/note="G protein"  
/codon\_start=1  
/product="attachment glycoprotein"  
/protein\_id="APY20413"  
/translation="IHTNSTTISPNTKSETHHTTAQTKGTTSTPTQNNKPSTKPRPKN  
PPKKDDYHFEVFNFPVCSICGNNQLCKSICKTIPSNKPKKPTTKPTNKPPTKTTNKR  
DPKTLAKTPKKENTINPTKKPTPKTTERDTSTPQSTVLDITTSKHTERDTSTSQSIAL  
DTTTSKHTTQQQSLYSTTPENTPNSTQTPTASEPSTSNST"

ORIGIN

1 atccacacaa actcaaccac aatataccac aatacaaaat cagaaacaca ccatacaaca  
61 gcacaaacca aaggcacaac ctctactcca acacagaaca acaagccaag cacaaaacca  
121 cgtccaaaaa atccacacaa aaaagatgat taccatttg aagtgtcaa cttgttccc  
181 ttagtatat gtggcaacaa tcaactctgc aatccatct gcaaaacaat accaagcaat  
241 aaaccaaaaga aaaaaccaac taaaaaaccc acaaacaaac cacctaccaa aactacaaac  
301 aaaagagacc caaaacact agccaaaaca ccgaaaaaag aaaacacat taaccaaca  
361 aaaaaaccaa cccaagac tacagaaaga gacaccagca cccacaate cactgtgctc  
421 gacataacca catcaaaaca cacagaaaga gacaccagca cctcacaate cattggett  
481 gacacaacca catcaaaaca cacaaccaa cagcaatctc ttactcaac cacccccgaa  
541 aacacacca actccacaca aacaccaca geatccgagc cctccacatc aaattetacc  
601 taa

//

LOCUS KY328073 624 bp cRNA linear VRL 13-DEC-2016  
DEFINITION Human respiratory syncytial virus B isolate TH-CU/C6153/2015  
attachment glycoprotein gene, partial cds.

ACCESSION KY328073

VERSION KY328073

KEYWORDS .

SOURCE Human respiratory syncytial virus B

ORGANISM Human respiratory syncytial virus B

Viruses; ssRNA viruses; ssRNA negative-strand viruses;  
Mononegavirales; Pneumoviridae; Orthopneumovirus.

REFERENCE 1 (bases 1 to 624)

AUTHORS Thongpan,I., Mauleekoonphairoj,J., Vichiwattana,P., Korkong,S.,  
Vongpunsawad,S. and Poovorawan,Y.

TITLE Molecular Characterization of Respiratory Syncytial Virus in  
Thailand, 2012-2015

JOURNAL Unpublished

REFERENCE 2 (bases 1 to 624)

AUTHORS Thongpan,I., Mauleekoonphairoj,J., Vichiwattana,P., Korkong,S.,  
Vongpunsawad,S. and Poovorawan,Y.

TITLE Direct Submission

JOURNAL Submitted (13-DEC-2016) Department of Pediatrics, Center of  
Excellence in Clinical Virology, Faculty of Medicine, Chulalongkorn  
University, Bangkok 10330, Thailand

COMMENT ##Assembly-Data-START##

Assembly Method :: DNASTAR-Lasergene v. 6  
Sequencing Technology :: Sanger dideoxy sequencing  
##Assembly-Data-END##

FEATURES Location/Qualifiers

source 1..624  
/organism="Human respiratory syncytial virus B"  
/mol\_type="viral cRNA"  
/isolate="TH-CU/C6153/2015"  
/host="Homo sapiens"  
/db\_xref="taxon:208895"  
/country="Thailand"  
/collection\_date="08-Oct-2015"  
/note="group: B"

CDS <1..624  
/note="G protein"  
/codon\_start=1  
/product="attachment glycoprotein"  
/protein\_id="APY20414"  
/translation="IHTNSATISPNTKSETHHTTAQTKGTTSTPTQNNKPSTKPRPKN  
PPKKDDYHFEVFNFPVCSICGNNQLCKSICKTIPSNPKPKKPTTKPTNKPPTKTTNKR  
DPKTLAKTPKKENTINPTKKPTKPTTERDTSTPQSTVLDITTSKHTERDTSTSQSIAL  
DTTTSKHTTQQQSLYSTTPENTPNSTQTPTASEPSTSNSTQRLQSYA"

ORIGIN

1 atccacacaa actcagccac aatatacccc aatacaaaat cagaaacaca ccatacaaca  
61 gcacaaacca aaggcacaac ctctactcca acacagaaca acaagccaag cacaaaacca  
121 cgtccaaaaa atccacaaa aaaagatgat taccattttg aagtgttcaa ctttgttccc  
181 tgtagtatat gtggcaacaa tcaactctgc aaatccattt gcaaaacaat accaagcaat  
241 aaaccaaaga aaaaaccaac taaaaaccc acaaacaaac cacctaccaa aaccacaaac  
301 aaaagagacc caaaacact agccaaaaca ccgaaaaaag aaaacacat taaccaaca  
361 aaaaaacaa ccccaagac tacagaaaga gacaccagca cccacaate cactgtgctc  
421 gacataacca catcaaaaca cacagaaaga gacaccagca cctcacaate cattgcactt  
481 gacacaacca catcaaaaca cacaaccaa cagcaatctc tctactcaac cacccccgaa  
541 aacacacca actccacaca aacaccaca gcatccgagc cctccacatc aaactctacc  
601 caaagactcc agtcatatgc ctg

//

LOCUS KY328074 624 bp cRNA linear VRL 13-DEC-2016

DEFINITION Human respiratory syncytial virus B isolate TH-CU/C6262/2015  
attachment glycoprotein gene, partial cds.

ACCESSION KY328074

VERSION KY328074

KEYWORDS .

SOURCE Human respiratory syncytial virus B

ORGANISM Human respiratory syncytial virus B

Viruses; ssRNA viruses; ssRNA negative-strand viruses;  
Mononegavirales; Pneumoviridae; Orthopneumovirus.

REFERENCE 1 (bases 1 to 624)

AUTHORS Thongpan,I., Mauleekoonphairoj,J., Vichiwattana,P., Korkong,S.,  
Vongpunsawad,S. and Poovorawan,Y.

TITLE Molecular Characterization of Respiratory Syncytial Virus in  
Thailand, 2012-2015

JOURNAL Unpublished

REFERENCE 2 (bases 1 to 624)

AUTHORS Thongpan,I., Mauleekoonphairoj,J., Vichiwattana,P., Korkong,S.,  
Vongpunsawad,S. and Poovorawan,Y.

TITLE Direct Submission

JOURNAL Submitted (13-DEC-2016) Department of Pediatrics, Center of  
Excellence in Clinical Virology, Faculty of Medicine, Chulalongkorn

University, Bangkok 10330, Thailand

COMMENT ##Assembly-Data-START##

Assembly Method :: DNASTAR-Lasergene v. 6  
Sequencing Technology :: Sanger dideoxy sequencing  
##Assembly-Data-END##

FEATURES Location/Qualifiers

source 1..624

/organism="Human respiratory syncytial virus B"  
/mol\_type="viral cRNA"  
/isolate="TH-CU/C6262/2015"  
/host="Homo sapiens"  
/db\_xref="taxon:208895"  
/country="Thailand"  
/collection\_date="19-Nov-2015"  
/note="group: B"

CDS <1..624

/note="G protein"  
/codon\_start=1  
/product="attachment glycoprotein"  
/protein\_id="APY20415"  
/translation="IHTNSATISPNTKSETHHTTAQTKGTTSTPTQNNKPSTKPRPKN  
PPKKDDYHFEVFNFPVPCISGNNQLCKSICKTIPSNKPKKKPTTKPTNKPTTKTNKR  
DPKTLAKTPKKENTINPTKKPTPTTERDSTPQSTVLDITTSKHTERDSTSQSIAL  
DTTTSKHTTQQQSLYSTTPENTPNSTQTPTASEPSTSNSTQRLQSYA"

ORIGIN

1 atccacaaa actcagccac aatatcacc aatacaaat cagaaacaca ccatacaaca  
61 gcacaaacca aaggcacaac ctctactcca acacagaaca acaagccaag cacaaaacca  
121 cgtccaaaaa atccacaaa aaaagatgat taccatttg aagtggtcaa cttgtgcc  
181 tgtagtatat gtggcaacaa tcaactctgc aatccattt gcaaaacaat accaagcaat  
241 aaaccaaaga aaaaaccaac tacaaaacce acaaacaaac cacctaccaa aaccacaaac  
301 aaaagagacc ccaaaacact agccaaaaca cggaaaaaag aaaacacat taaccaaca  
361 aaaaaaccaa cccccaagac tacagaaaga gacaccagca cccacaate cactgtgctc  
421 gacataacca catcaaaaca cacagaaaga gacaccagca ctcacaate cattgcactt  
481 gacacaacca catcaaaaca cacacccaa cagcaatctc ttactcaac cacccccgaa  
541 aacacacca actccacaca aacaccaca geatccgagc cctccacate aaactctacc  
601 caaagactcc agtcatatgc ctg

//

LOCUS KY328075 624 bp cRNA linear VRL 13-DEC-2016  
DEFINITION Human respiratory syncytial virus B isolate TH-CU/B12557/2015  
attachment glycoprotein gene, partial cds.

ACCESSION KY328075

VERSION KY328075

KEYWORDS .

SOURCE Human respiratory syncytial virus B

ORGANISM Human respiratory syncytial virus B

Viruses; ssRNA viruses; ssRNA negative-strand viruses;  
Mononegavirales; Pneumoviridae; Orthopneumovirus.

REFERENCE 1 (bases 1 to 624)

AUTHORS Thongpan,I., Mauleekoonphairoj,J., Vichiwattana,P., Korkong,S.,  
Vongpunsawad,S. and Poovorawan,Y.

TITLE Molecular Characterization of Respiratory Syncytial Virus in  
Thailand, 2012-2015

JOURNAL Unpublished

REFERENCE 2 (bases 1 to 624)

AUTHORS Thongpan,I., Mauleekoonphairoj,J., Vichiwattana,P., Korkong,S.,  
Vongpunsawad,S. and Poovorawan,Y.

TITLE Direct Submission

JOURNAL Submitted (13-DEC-2016) Department of Pediatrics, Center of  
Excellence in Clinical Virology, Faculty of Medicine, Chulalongkorn  
University, Bangkok 10330, Thailand

COMMENT ##Assembly-Data-START##

Assembly Method :: DNASTAR-Lasergene v. 6  
Sequencing Technology :: Sanger dideoxy sequencing  
##Assembly-Data-END##

FEATURES Location/Qualifiers

source 1..624  
/organism="Human respiratory syncytial virus B"  
/mol\_type="viral cRNA"  
/isolate="TH-CU/B12557/2015"  
/host="Homo sapiens"  
/db\_xref="taxon:208895"  
/country="Thailand"  
/collection\_date="16-Aug-2015"  
/note="group: B"

CDS <1..624  
/note="G protein"  
/codon\_start=1  
/product="attachment glycoprotein"  
/protein\_id="APY20416"  
/translation="IHTNSATISPNTKSETHHTTAQTKGTTSTPTQNNKPSTKPRPKN  
PPKKDDYHFEVFNFPVCSICGNNQLCKSICKTIPSNKPKKKPTTKPTNKPPTKTTNKR  
DPKTLAKTPKKENTINPTKKPTKTTTERDTSTPQSTVLDITTSKHTERDTSTPQSIAL  
DTTTSKHTTQQQLHSTTPENTPNSTQTPTASEPSTSNSSTQRLQSYA"

ORIGIN

1 atccacaaa actcagccac aatataccac aatacaaaat cagaacacac ccatacaaca  
61 gcacaaacca aaggcacaac ctctactcca acacagaaca acaagccaag cacaaaacca  
121 cgtccaaaaa atccacaaa aaaagatgat taccatttg aagtgtcaa cttgtgcc  
181 ttagtatat gtggcaaca tcaactctgc aatccattt gcaaaacaat accaagcaat  
241 aaaccaaaaga aaaaaccaac taaaaaaccc acaaacacac cacctaccaa aaccacaaac  
301 aaaagagacc caaaacact agccaaaaca ccgaaaaaag aaaacacat taaccaaca  
361 aaaaaaccaa cccaagac tacagaaaga gacaccagca cccacaatc cactgtgctc  
421 gacataacca catcaaaaca cacagaaaga gacaccagca cccacaatc cattgcgctt  
481 gacacaacca catcaaaaca cacacccaa cagcaatctc tccactcaac ccccccgaa  
541 aacacacca actccacaca aacaccaca gcatccgagc cctccacatc aaattccacc  
601 caaagactcc agtcatatgc tttag

//

LOCUS KY328076 624 bp cRNA linear VRL 13-DEC-2016  
DEFINITION Human respiratory syncytial virus B isolate TH-CU/B12728/2015  
attachment glycoprotein gene, partial cds.

ACCESSION KY328076

VERSION KY328076

KEYWORDS .

SOURCE Human respiratory syncytial virus B

ORGANISM Human respiratory syncytial virus B  
Viruses; ssRNA viruses; ssRNA negative-strand viruses;  
Mononegavirales; Pneumoviridae; Orthopneumovirus.

REFERENCE 1 (bases 1 to 624)

AUTHORS Thongpan,I., Mauleekoonphairoj,J., Vichiwattana,P., Korkong,S.,

Vongpunsawad,S. and Poovorawan,Y.  
**TITLE** Molecular Characterization of Respiratory Syncytial Virus in Thailand, 2012-2015  
**JOURNAL** Unpublished  
**REFERENCE** 2 (bases 1 to 624)  
**AUTHORS** Thongpan,I., Mauleekoonphairoj,J., Vichiwattana,P., Korkong,S., Vongpunsawad,S. and Poovorawan,Y.  
**TITLE** Direct Submission  
**JOURNAL** Submitted (13-DEC-2016) Department of Pediatrics, Center of Excellence in Clinical Virology, Faculty of Medicine, Chulalongkorn University, Bangkok 10330, Thailand  
**COMMENT** ##Assembly-Data-START##  
Assembly Method :: DNASTAR-Lasergene v. 6  
Sequencing Technology :: Sanger dideoxy sequencing  
##Assembly-Data-END##  
**FEATURES** Location/Qualifiers  
source 1..624  
/organism="Human respiratory syncytial virus B"  
/mol\_type="viral cRNA"  
/isolate="TH-CU/B12728/2015"  
/host="Homo sapiens"  
/db\_xref="taxon:208895"  
/country="Thailand"  
/collection\_date="26-Aug-2015"  
/note="group: B"  
CDS <1..624  
/note="G protein"  
/codon\_start=1  
/product="attachment glycoprotein"  
/protein\_id="APY20417"  
/translation="IHTNSATISPNTKSETHHTTAQTKGTTSTPTQNNKPSTKPRPKN  
PPKKDDYHFEVFNFPVCSICGNNQLCKSICKTIPSNKPKKKPTTKPTNKPPTKTTNKR  
DPKTLAKTPKKENTINPTKKPTKPTTERDTSTPQSTVLDITTSKHTERDTSTPQSIAL  
DTTTSKHTTQQQLHSTTPENTPNSTQTPTASEPSTSNSTQRLQSYA"  
**ORIGIN**  
1 atccacacaa actcagccac aatatcacc aatacaaat cagaaacaca ccatacaaca  
61 gcacaaacca aaggcacaac ctctactcca acacagaaca acaagccaag cacaaaacca  
121 cgtccaaaaa atccacaaa aaaagatgat taccatttg aagtgtcaa cttgttccc  
181 tgtagtatat gtggcaacaa tcaactctgc aaatccattt gcaaaacaat accaagcaat  
241 aaaccaaaga aaaaaccaac tacaaaacc acaaacaaac cacctaccaa aaccacaaac  
301 aaaagagacc caaaacact agccaaaaca ccgaaaaaag aaaacacat taaccaaca  
361 aaaaaccaa ccccaagac tacagaaaga gacaccagca cccacaatc cactgtgctc  
421 gacataacca catcaaaaca cacagaaaga gacaccagca cccacaatc cattgcgctt  
481 gacacaacca catcaaaaca cacaaccaa cagcaatctc tccactcaac cacccecgaa  
541 aacacacca actccacaca aacaccaca geatccgagc cctccacatc aaattecacc  
601 caaagactcc agtcatatgc ttag  
//  
**LOCUS** KY328077 603 bp cRNA linear VRL 13-DEC-2016  
**DEFINITION** Human respiratory syncytial virus B isolate TH-CU/B12360/2015 attachment glycoprotein gene, partial cds.  
**ACCESSION** KY328077  
**VERSION** KY328077  
**KEYWORDS** .  
**SOURCE** Human respiratory syncytial virus B



ORGANISM Human respiratory syncytial virus B  
Viruses; ssRNA viruses; ssRNA negative-strand viruses;  
Mononegavirales; Pneumoviridae; Orthopneumovirus.

REFERENCE 1 (bases 1 to 603)

AUTHORS Thongpan,I., Mauleekoonphairoj,J., Vichiwattana,P., Korkong,S.,  
Vongpunsawad,S. and Poovorawan,Y.

TITLE Molecular Characterization of Respiratory Syncytial Virus in  
Thailand, 2012-2015

JOURNAL Unpublished

REFERENCE 2 (bases 1 to 603)

AUTHORS Thongpan,I., Mauleekoonphairoj,J., Vichiwattana,P., Korkong,S.,  
Vongpunsawad,S. and Poovorawan,Y.

TITLE Direct Submission

JOURNAL Submitted (13-DEC-2016) Department of Pediatrics, Center of  
Excellence in Clinical Virology, Faculty of Medicine, Chulalongkorn  
University, Bangkok 10330, Thailand

COMMENT ##Assembly-Data-START##

Assembly Method :: DNASTAR-Lasergene v. 6  
Sequencing Technology :: Sanger dideoxy sequencing  
##Assembly-Data-END##

FEATURES Location/Qualifiers

source 1..603  
/organism="Human respiratory syncytial virus B"  
/mol\_type="viral cRNA"  
/isolate="TH-CU/B12360/2015"  
/host="Homo sapiens"  
/db\_xref="taxon:208895"  
/country="Thailand"  
/collection\_date="12-Jul-2015"  
/note="group: B"

CDS <1..603  
/note="G protein"  
/codon\_start=1  
/product="attachment glycoprotein"  
/protein\_id="APY20418"  
/translation="IHTNSATISPNTKSETHHTTAQTKSTTSTPTQNNKPSTKPRPKN  
PPKKDDYHFEVFNFPVPCISCGNNQLCKSICKTIPSNKPKKKPTTKPTNKPPTKTTNKR  
DPKTLAKTPKKETTINPTKKPTPKTTERDSTPQSTVLDITTSKHTERDTSTSQSIAL  
DTTTSKHTTQQQSLYSTTPENTPNSTQTPTASEPSTSNST"

ORIGIN

1 atccacaaa actcagccac aatataccac aatacaaaat cagaaacaca ccatacaaca  
61 gcacaaacca aaagcacaac ctctactcca acacagaaca acaagccgag cacaaaacca  
121 cgtccaaaaa atccacaaa aaaagatgat taccattttg aagtgttcaa ctttgttccc  
181 tgtagtatat gtggcaacaa tcaactctgc aatccattt gcaaaacaat accaagcaac  
241 aaaccaaaaga aaaaaccaac taaaaaacc acaaacaaac cacctactaa aaccacaaac  
301 aaaagagacc ccaaactact agccaaaaca ccgaaaaaag aaaccacat taaccaaca  
361 aaaaaaccaa ccccaagac tacagaaaga gacaccagca cccacaate cactgtgctc  
421 gacataacca catcaaaaca cacagaaaga gacaccagca cctcacaate cattgcgctt  
481 gacacaacca catcaaaaca cacaaccaa cagcaatctc ttactcaac ccccccgaa  
541 aacacacca actccacaca aacaccaca gcatccgagc cctccacatc aattctacc  
601 taa

//

LOCUS KY328078 603 bp cRNA linear VRL 13-DEC-2016

DEFINITION Human respiratory syncytial virus B isolate TH-CU/C6207/2015

attachment glycoprotein gene, partial cds.  
 ACCESSION KY328078  
 VERSION KY328078  
 KEYWORDS .  
 SOURCE Human respiratory syncytial virus B  
 ORGANISM Human respiratory syncytial virus B  
 Viruses; ssRNA viruses; ssRNA negative-strand viruses;  
 Mononegavirales; Pneumoviridae; Orthopneumovirus.  
 REFERENCE 1 (bases 1 to 603)  
 AUTHORS Thongpan,I., Mauleekoonphairoj,J., Vichiwattana,P., Korkong,S.,  
 Vongpunsawad,S. and Poovorawan,Y.  
 TITLE Molecular Characterization of Respiratory Syncytial Virus in  
 Thailand, 2012-2015  
 JOURNAL Unpublished  
 REFERENCE 2 (bases 1 to 603)  
 AUTHORS Thongpan,I., Mauleekoonphairoj,J., Vichiwattana,P., Korkong,S.,  
 Vongpunsawad,S. and Poovorawan,Y.  
 TITLE Direct Submission  
 JOURNAL Submitted (13-DEC-2016) Department of Pediatrics, Center of  
 Excellence in Clinical Virology, Faculty of Medicine, Chulalongkorn  
 University, Bangkok 10330, Thailand  
 COMMENT ##Assembly-Data-START##  
 Assembly Method :: DNASTAR-Lasergene v. 6  
 Sequencing Technology :: Sanger dideoxy sequencing  
 ##Assembly-Data-END##

FEATURES Location/Qualifiers  
 source 1..603  
 /organism="Human respiratory syncytial virus B"  
 /mol\_type="viral cRNA"  
 /isolate="TH-CU/C6207/2015"  
 /host="Homo sapiens"  
 /db\_xref="taxon:208895"  
 /country="Thailand"  
 /collection\_date="29-Oct-2015"  
 /note="group: B"  
 CDS <1..603  
 /note="G protein"  
 /codon\_start=1  
 /product="attachment glycoprotein"  
 /protein\_id="APY20419"  
 /translation="IHTNSATISPNTKSETHHTTAQTKSTTSTPTQNNKPSTKPRPKN  
 PPKKDDYHFEVFNFPVCSICGNNQLCKSICKTIPSNPKPKKPTTKPTNKPPTKTTNKR  
 DPKTLAKTPKKETTINPTKKPTKTTTERDISTPQSTVLDITTSKHTERDSTSTQSIAL  
 DTTTSKHTTQQQSLYSTTPENTPNSTQTPTASEPSTSNST"

ORIGIN  
 1 atccacacaa actcagccac aatatcacc aatacaaat cagaaacaca ccatacaaca  
 61 gcacaaacca aaagcacaac ctctactcca acacagaaca acaagccgag cacaaaacca  
 121 cgtccaaaaa atccacaaa aaaagatgat taccatttg aagtggtcaa cttgtgtccc  
 181 tgtagtatat gtggcaacaa tcaactctgc aaatccattt gcaaaacaat accaagcaac  
 241 aaaccaaaaga aaaaaccaac tacaaaaccc acaaacaaac cacctactaa aaccacaaac  
 301 aaaagagacc ccaaaacact agccaaaaca ccgaaaaaag aaaccacat taaccaaca  
 361 aaaaaaccaa ccccaagac tacagaaaga gacatcagca cccacaatc cactgtgctc  
 421 gacataacca catcaaaaca cacagaaaga gacaccagca ctcacaatc cattgcgett  
 481 gacacaacca catcaaaaca cacaaccaa cagcaatctc ttactcaac ccccccgaa

541 aacacacca actccacaca aacaccaca gcatccgagc cctccacatc aaattctacc  
601 taa

//

LOCUS KY328079 603 bp cRNA linear VRL 13-DEC-2016  
DEFINITION Human respiratory syncytial virus B isolate TH-CU/C6249/2015  
attachment glycoprotein gene, partial cds.

ACCESSION KY328079

VERSION KY328079

KEYWORDS .

SOURCE Human respiratory syncytial virus B

ORGANISM Human respiratory syncytial virus B

Viruses; ssRNA viruses; ssRNA negative-strand viruses;  
Mononegavirales; Pneumoviridae; Orthopneumovirus.

REFERENCE 1 (bases 1 to 603)

AUTHORS Thongpan,I., Mauleekoonphairoj,J., Vichiwattana,P., Korkong,S.,  
Vongpunsawad,S. and Poovorawan,Y.

TITLE Molecular Characterization of Respiratory Syncytial Virus in  
Thailand, 2012-2015

JOURNAL Unpublished

REFERENCE 2 (bases 1 to 603)

AUTHORS Thongpan,I., Mauleekoonphairoj,J., Vichiwattana,P., Korkong,S.,  
Vongpunsawad,S. and Poovorawan,Y.

TITLE Direct Submission

JOURNAL Submitted (13-DEC-2016) Department of Pediatrics, Center of  
Excellence in Clinical Virology, Faculty of Medicine, Chulalongkorn  
University, Bangkok 10330, Thailand

COMMENT ##Assembly-Data-START##

Assembly Method :: DNASTAR-Lasergene v. 6  
Sequencing Technology :: Sanger dideoxy sequencing  
##Assembly-Data-END##

FEATURES Location/Qualifiers

source 1..603

/organism="Human respiratory syncytial virus B"  
/mol\_type="viral cRNA"  
/isolate="TH-CU/C6249/2015"  
/host="Homo sapiens"  
/db\_xref="taxon:208895"  
/country="Thailand"  
/collection\_date="19-Nov-2015"  
/note="group: B"

CDS <1..603

/note="G protein"  
/codon\_start=1  
/product="attachment glycoprotein"  
/protein\_id="APY20420"  
/translation="IHTNSATISPNTKSETHHTTAQTKSTTSTPTQNNKPSTKPRPKN  
PPKKDDYHFEVFNFPVCSICGNNQLCKSICKTIPSNKPKKKPTTKPTNKPPTKTTNKR  
DPKTLAKTPKKETTINPTKKPTPKTTERDISTPQSTVLDITTSKHTERDTSTSQSIAL  
DTTTSKHTTQQQSLYSTTPENTPNSTQTPTASEPSTSNST"

ORIGIN

1 atccacacaa actcagccac aatatacccc aatacaaaat cagaaacaca ccatacaaca  
61 gcacaaacca aaagcacaac ctctactcca acacagaaca acaagccgag cacaaaacca  
121 cgtccaaaaa atccacaaa aaaagatgat taccatttg aagtgtcaa cttgtgcc  
181 tgtagtatat gtggcaacaa tcaactctgc aatccattt gcaaaacaat accaagcaac

241 aaaccaaga aaaaccaac tacaaaacc acaacaac cacactactaa aaccacaac  
301 aaaagagacc ccaaacact agccaaaaca ccgaaaaaag aaaccacat taaccaaca  
361 aaaaaacaa ccccaagac tacagaaaga gacatcagca cccacaate cactgtgctc  
421 gacataacca catcaaaaca cacagaaaga gacaccagca cctcacaate cattgcgctt  
481 gacacaacca catcaaaaca cacaaccaa cagcaatctc tctactcaac cacccccgaa  
541 aacacacca actccacaca aacaccaca gcatccgagc cctccacatc aaattctacc  
601 taa

//

LOCUS KY328080 603 bp cRNA linear VRL 13-DEC-2016

DEFINITION Human respiratory syncytial virus B isolate TH-CU/C6217/2015  
attachment glycoprotein gene, partial cds.

ACCESSION KY328080

VERSION KY328080

KEYWORDS .

SOURCE Human respiratory syncytial virus B

ORGANISM Human respiratory syncytial virus B

Viruses; ssRNA viruses; ssRNA negative-strand viruses;

Mononegavirales; Pneumoviridae; Orthopneumovirus.

REFERENCE 1 (bases 1 to 603)

AUTHORS Thongpan,I., Mauleekoonphairoj,J., Vichiwattana,P., Korkong,S.,  
Vongpunsawad,S. and Poovorawan,Y.

TITLE Molecular Characterization of Respiratory Syncytial Virus in  
Thailand, 2012-2015

JOURNAL Unpublished

REFERENCE 2 (bases 1 to 603)

AUTHORS Thongpan,I., Mauleekoonphairoj,J., Vichiwattana,P., Korkong,S.,  
Vongpunsawad,S. and Poovorawan,Y.

TITLE Direct Submission

JOURNAL Submitted (13-DEC-2016) Department of Pediatrics, Center of  
Excellence in Clinical Virology, Faculty of Medicine, Chulalongkorn  
University, Bangkok 10330, Thailand

COMMENT ##Assembly-Data-START##

Assembly Method :: DNASTAR-Lasergene v. 6  
Sequencing Technology :: Sanger dideoxy sequencing  
##Assembly-Data-END##

FEATURES Location/Qualifiers

source 1..603

/organism="Human respiratory syncytial virus B"

/mol\_type="viral cRNA"

/isolate="TH-CU/C6217/2015"

/host="Homo sapiens"

/db\_xref="taxon:208895"

/country="Thailand"

/collection\_date="04-Nov-2015"

/note="group: B"

CDS <1..603

/note="G protein"

/codon\_start=1

/product="attachment glycoprotein"

/protein\_id="APY20421"

/translation="IHTNSATISPNTKSETHHTTAQTKSTTSTPTQNNKPSTKPRPKN

PPKKDDYHFEVFNFPVPCISCGNNQLCKSICKTIPSNKPKKPTTKPTNKPPTKTTNKR

DPKTLAKTPKKETTINPTKKPTPKTTERDISTPQSTVLDITTSKHTERDTSTSQSIAL

DTTTSKHTTQQQSLYSTTPENTPNSTQTPTASEPSTSNST"

## ORIGIN

1 atccacacaa actcagccac aatatcacc aatacaaaat cagaaacaca ccatacaaca  
61 gcacaaacca aaagcacaac ctctactcca acacagaaca acaagccgag cacaaaacca  
121 cgtccaaaaa atccacaaa aaaagatgat taccattttg aagtgttcaa ctttgttccc  
181 tgtagtatat gtggcaacaa tcaactctgc aaatccattt gcaaaacaat accaagcaac  
241 aaaccaaaga aaaaaccaac tacaaaaccc acaaacaaac cacctactaa aaccacaaac  
301 aaaagagacc ccaaaacact agccaaaaca ccgaaaaaag aaaccacat taaccaaca  
361 aaaaaaccaa cccccaagac tacagaaaga gacatcagca cccacaatc cactgtgctc  
421 gacataacca catcaaaaca cacagaaaga gacaccagca cctcacaatc cattgcgett  
481 gacacaacca catcaaaaca cacaaccaa cagcaatctc ttactcaac cacccccgaa  
541 aacacacca actccacaca aacaccaca geatccgagc cctccacatc aaattctacc  
601 taa

//

LOCUS KY328081 603 bp cRNA linear VRL 13-DEC-2016

DEFINITION Human respiratory syncytial virus B isolate TH-CU/C6250/2015  
attachment glycoprotein gene, partial cds.

ACCESSION KY328081

VERSION KY328081

KEYWORDS .

SOURCE Human respiratory syncytial virus B

ORGANISM Human respiratory syncytial virus B

Viruses; ssRNA viruses; ssRNA negative-strand viruses;  
Mononegavirales; Pneumoviridae; Orthopneumovirus.

REFERENCE 1 (bases 1 to 603)

AUTHORS Thongpan,I., Mauleekoonphairoj,J., Vichiwattana,P., Korkong,S.,  
Vongpunsawad,S. and Poovorawan,Y.

TITLE Molecular Characterization of Respiratory Syncytial Virus in  
Thailand, 2012-2015

JOURNAL Unpublished

REFERENCE 2 (bases 1 to 603)

AUTHORS Thongpan,I., Mauleekoonphairoj,J., Vichiwattana,P., Korkong,S.,  
Vongpunsawad,S. and Poovorawan,Y.

TITLE Direct Submission

JOURNAL Submitted (13-DEC-2016) Department of Pediatrics, Center of  
Excellence in Clinical Virology, Faculty of Medicine, Chulalongkorn  
University, Bangkok 10330, Thailand

COMMENT ##Assembly-Data-START##

Assembly Method :: DNASTAR-Lasergene v. 6  
Sequencing Technology :: Sanger dideoxy sequencing  
##Assembly-Data-END##

FEATURES Location/Qualifiers

source 1..603  
/organism="Human respiratory syncytial virus B"  
/mol\_type="viral cRNA"  
/isolate="TH-CU/C6250/2015"  
/host="Homo sapiens"  
/db\_xref="taxon:208895"  
/country="Thailand"  
/collection\_date="19-Nov-2015"  
/note="group: B"

CDS <1..603  
/note="G protein"  
/codon\_start=1  
/product="attachment glycoprotein"

/protein\_id="APY20422"  
/translation="IHTNSATISPNTKSETHHTTAQTKSTTSTPTQNNKPSTKPRPKN  
PPKKDDYHFEVFNFVPCISCGNNQLCKSICKTIPSNKPKKKPTTKPTNKPPTKTTNKR  
DPKTLAKTPKKETTINPTKKPTKTTTERDISTPQSTVLDITTSKHTERDTSTSQSIAL  
DTTTSKHTTQQQSLYSTTPENTPNSTQTPTASEPSTSNST"

ORIGIN

1 atccacaaa actcagccac aatataccac aatacaaaat cagaaacaca ccatacaaca  
61 gcacaaacca aaagcacaac ctctactcca acacagaaca acaagccgag cacaaaacca  
121 cgtccaaaaa atccacaaa aaaagatgat taccatttg aagtgtcaa cttgtgcc  
181 ttagtatat gtggcaaca tcaactctgc aatccattt gcaaaacaat accaagcaac  
241 aaaccaaaaga aaaaaccaac taaaaaaccc acaaacaaac cacactactaa aaccacaaac  
301 aaaagagacc caaaacact agccaaaaca ccgaaaaaag aaaccacat taaccaaca  
361 aaaaaaccaa ccccaagac tacagaaaga gacatcagca cccacaatc cactgtgctc  
421 gacataacca catcaaaaca cacagaaaga gacaccagca cctcacaatc cattgcgctt  
481 gacacaacca catcaaaaca cacaaccaa cagcaatctc tctactcaac cacccccgaa  
541 aacacacca actccacaca aacaccaca gcatccgagc cctccacatc aaattctacc  
601 taa

//

LOCUS KY328082 603 bp cRNA linear VRL 13-DEC-2016

DEFINITION Human respiratory syncytial virus B isolate TH-CU/C6226/2015  
attachment glycoprotein gene, partial cds.

ACCESSION KY328082

VERSION KY328082

KEYWORDS .

SOURCE Human respiratory syncytial virus B

ORGANISM Human respiratory syncytial virus B

Viruses; ssRNA viruses; ssRNA negative-strand viruses;  
Mononegavirales; Pneumoviridae; Orthopneumovirus.

REFERENCE 1 (bases 1 to 603)

AUTHORS Thongpan,I., Mauleekoonphairoj,J., Vichiwattana,P., Korkong,S.,  
Vongpunsawad,S. and Poovorawan,Y.

TITLE Molecular Characterization of Respiratory Syncytial Virus in  
Thailand, 2012-2015

JOURNAL Unpublished

REFERENCE 2 (bases 1 to 603)

AUTHORS Thongpan,I., Mauleekoonphairoj,J., Vichiwattana,P., Korkong,S.,  
Vongpunsawad,S. and Poovorawan,Y.

TITLE Direct Submission

JOURNAL Submitted (13-DEC-2016) Department of Pediatrics, Center of  
Excellence in Clinical Virology, Faculty of Medicine, Chulalongkorn  
University, Bangkok 10330, Thailand

COMMENT ##Assembly-Data-START##

Assembly Method :: DNASTAR-Lasergene v. 6  
Sequencing Technology :: Sanger dideoxy sequencing  
##Assembly-Data-END##

FEATURES Location/Qualifiers

source 1..603

/organism="Human respiratory syncytial virus B"

/mol\_type="viral cRNA"

/isolate="TH-CU/C6226/2015"

/host="Homo sapiens"

/db\_xref="taxon:208895"

/country="Thailand"

/collection\_date="04-Nov-2015"

CDS /note="group: B"  
<1..603  
/note="G protein"  
/codon\_start=1  
/product="attachment glycoprotein"  
/protein\_id="APY20423"  
/translation="IHTNSATISPNTKSETHHTTAQTKSTTSTPTQNNKPSTKPRPKN  
PPKKDDYHFEVFNFVPCISICGNNQLCKSICKTIPSNKPKKKPTTKPTNKPPTKTTNKR  
DPKTLAKTPKKETTINPTKKPTPKTTERDISTPQSTVLDITTSKHTERDTSTSQSIAL  
DTTTSKHTTQQQLYSTTPENTPNSTQTPTASEPSTSNST"

ORIGIN

1 atccacacaa actcagccac aatatcacc aatacaaaat cagaaacaca ccatacaaca  
61 gcacaaacca aaagcacaac ctctactcca acacagaaca acaagccgag cacaaaacca  
121 cgtccaaaaa atccacaaa aaaagatgat taccattttg aagtgtcaa cttgttccc  
181 tgtagtatat gtggcaacaa tcaactctgc aatccattt gaaaaacaat accaagcaac  
241 aaaccaaaga aaaaaccaac tacaaaaccc acaaacaaac cacctactaa aaccacaaac  
301 aaaagagacc caaaacact agccaaaaca ccgaaaaaag aaaccacat taaccaaca  
361 aaaaaccaa ccccaagac tacagaaaga gacatcagca cccacaatc cactgtgctc  
421 gacataacca catcaaaaca cacagaaaga gacaccagca cctcacaatc cattgcgett  
481 gacacaacca catcaaaaca cacaaccaa cagcaatctc tctactcaac cacccccgaa  
541 aacacacca actccacaca aacaccaca geatccgagc cctccacatc aaattctacc  
601 taa

//

LOCUS KY328083 603 bp cRNA linear VRL 13-DEC-2016  
DEFINITION Human respiratory syncytial virus B isolate B/TH-CU/B12563/2015  
attachment glycoprotein gene, partial cds.

ACCESSION KY328083

VERSION KY328083

KEYWORDS .

SOURCE Human respiratory syncytial virus B

ORGANISM Human respiratory syncytial virus B

Viruses; ssRNA viruses; ssRNA negative-strand viruses;  
Mononegavirales; Pneumoviridae; Orthopneumovirus.

REFERENCE 1 (bases 1 to 603)

AUTHORS Thongpan,I., Mauleekoonphairoj,J., Vichiwattana,P., Korkong,S.,  
Vongpunsawad,S. and Poovorawan,Y.

TITLE Molecular Characterization of Respiratory Syncytial Virus in  
Thailand, 2012-2015

JOURNAL Unpublished

REFERENCE 2 (bases 1 to 603)

AUTHORS Thongpan,I., Mauleekoonphairoj,J., Vichiwattana,P., Korkong,S.,  
Vongpunsawad,S. and Poovorawan,Y.

TITLE Direct Submission

JOURNAL Submitted (13-DEC-2016) Department of Pediatrics, Center of  
Excellence in Clinical Virology, Faculty of Medicine, Chulalongkorn  
University, Bangkok 10330, Thailand

COMMENT ##Assembly-Data-START##

Assembly Method :: DNASTAR-Lasergene v. 6  
Sequencing Technology :: Sanger dideoxy sequencing  
##Assembly-Data-END##

FEATURES Location/Qualifiers

source 1..603

/organism="Human respiratory syncytial virus B"  
/mol\_type="viral cRNA"

/isolate="B/TH-CU/B12563/2015"  
/host="Homo sapiens"  
/db\_xref="taxon:208895"  
/country="Thailand"  
/collection\_date="16-Aug-2015"  
/note="group: B"

CDS

<1..603  
/note="G protein"  
/codon\_start=1  
/product="attachment glycoprotein"  
/protein\_id="APY20424"  
/translation="IHTNSATISPNTKSETHHTTAQTKSTTSTPTQNNKPSTKPRPKN  
PPKKDDYHFEVFNFPVPCISICGNNQLCKSICKTIPSNKPKKKPTTKPTNKPTKTNNKR  
DPKTLAKTPKKETTINPTKKPTPKTTERDISTPQSTVLNITTSKHTERDTSTSQSIAL  
DTTTSKHTTQQQSLYSTTPENTPNSTQTPTASEPSTSNST"

ORIGIN

1 atccacaaa actcagccac aatataccac aatacaaaat cagaaacaca ccatacaaca  
61 gcacaaacca aaagcacaac ctctactcca acacagaaca acaagccgag cacaaaacca  
121 cgtccaaaaa atccacaaa aaaagatgat taccatttg aagtgttcaa cttgttccc  
181 tgtagtatat gtggcaacaa tcaactctgc aatccattt gcaaaacaat accaagcaac  
241 aaaccaaaga aaaaaccaac tacaaaaccc acaaacaaac cacctactaa aaccacaac  
301 aaaagagacc ccaaactact agccaaaaca ccgaaaaaag aaaccacat taaccaaca  
361 aaaaaaccaa ccccaagac tacagaaaga gacatcagca cccacaate cactgtgctc  
421 aacataacca catcaaaaca cacagaaaga gacaccagca cctacaate cattgcgctt  
481 gacacaacca catcaaaaca cacaaccaa cagcaatctc ttactcaac cacccccgaa  
541 aacacacca actccacaca aacaccaca gcatccgagc cctccacatc aaattctacc  
601 taa

//

LOCUS KY328084 603 bp cRNA linear VRL 13-DEC-2016  
DEFINITION Human respiratory syncytial virus B isolate TH-CU/C6552/2015  
attachment glycoprotein gene, partial cds.

ACCESSION KY328084

VERSION KY328084

KEYWORDS .

SOURCE Human respiratory syncytial virus B

ORGANISM Human respiratory syncytial virus B

Viruses; ssRNA viruses; ssRNA negative-strand viruses;  
Mononegavirales; Pneumoviridae; Orthopneumovirus.

REFERENCE 1 (bases 1 to 603)

AUTHORS Thongpan,I., Mauleekoonphairoj,J., Vichiwattana,P., Korkong,S.,  
Vongpunsawad,S. and Poovorawan,Y.

TITLE Molecular Characterization of Respiratory Syncytial Virus in  
Thailand, 2012-2015

JOURNAL Unpublished

REFERENCE 2 (bases 1 to 603)

AUTHORS Thongpan,I., Mauleekoonphairoj,J., Vichiwattana,P., Korkong,S.,  
Vongpunsawad,S. and Poovorawan,Y.

TITLE Direct Submission

JOURNAL Submitted (13-DEC-2016) Department of Pediatrics, Center of  
Excellence in Clinical Virology, Faculty of Medicine, Chulalongkorn  
University, Bangkok 10330, Thailand

COMMENT ##Assembly-Data-START##

Assembly Method :: DNASTAR-Lasergene v. 6  
Sequencing Technology :: Sanger dideoxy sequencing



##Assembly-Data-END##

FEATURES Location/Qualifiers

source 1..603

/organism="Human respiratory syncytial virus B"  
/mol\_type="viral cRNA"  
/isolate="TH-CU/C6552/2015"  
/host="Homo sapiens"  
/db\_xref="taxon:208895"  
/country="Thailand"  
/collection\_date="19-Nov-2015"  
/note="group: B"

CDS <1..603

/note="G protein"  
/codon\_start=1  
/product="attachment glycoprotein"  
/protein\_id="APY20425"  
/translation="IHTNSATISPNTKSETHHTTAQTKSTTSTPTQNNKPSTKPRPKN  
SPKKDDYHFEVFNFPVCSICGNNQLCKSICKTIPSNKPKKPTTKPTNKPPTKTTNKR  
DPKTLAKTPKKETTINPTKKPTKTTTERDISTPQSTVLDITTSKHTERDSTSTSQSIAL  
DTTTSKHTTQQQSLYSTTPENTPNSTQTPTASEPSTSNST"

ORIGIN

1 atccacacaa actcagccac aatataccac aatacaaaat cagaaacaca ccatacaaca  
61 gcacaaacca aaagcacaac ctctactcca acacaaaaca acaagccgag cacaaaacca  
121 cgtccaaaaa atccacaaa aaaagatgat taccatttg aagtgtcaa cttgttccc  
181 tgtagtatat gtggcaacaa tcaactctgc aaatccattt gcaaaacaat accaagcaac  
241 aaaccaaaaga aaaaaccaac tacaaaaccc acaaaaaaac cacactactaa aaccacaaac  
301 aaaagagacc ccaaaacact agccaaaaca ccgaaaaaag aaaccacat taaccaaca  
361 aaaaaaccaa cccccaagac tacagaaaga gacatcagca cccacaatc cactgtgctc  
421 gacataacca catcaaaaca cacagaaaga gacaccagca ctcacaatc cattgctt  
481 gacacaacca catcaaaaca cacaaccaa cagcaatctc ttactcaac cacccccgaa  
541 aacacacca actccacaca aacaccaca geatccgagc cctccacatc aaattctacc  
601 taa

//

LOCUS KY328085 603 bp cRNA linear VRL 13-DEC-2016  
DEFINITION Human respiratory syncytial virus B isolate TH-CU/B10639/2014  
attachment glycoprotein gene, partial cds.

ACCESSION KY328085

VERSION KY328085

KEYWORDS .

SOURCE Human respiratory syncytial virus B

ORGANISM Human respiratory syncytial virus B  
Viruses; ssRNA viruses; ssRNA negative-strand viruses;  
Mononegavirales; Pneumoviridae; Orthopneumovirus.

REFERENCE 1 (bases 1 to 603)

AUTHORS Thongpan,I., Mauleekoonphairoj,J., Vichiwattana,P., Korkong,S.,  
Vongpunsawad,S. and Poovorawan,Y.

TITLE Molecular Characterization of Respiratory Syncytial Virus in  
Thailand, 2012-2015

JOURNAL Unpublished

REFERENCE 2 (bases 1 to 603)

AUTHORS Thongpan,I., Mauleekoonphairoj,J., Vichiwattana,P., Korkong,S.,  
Vongpunsawad,S. and Poovorawan,Y.

TITLE Direct Submission

JOURNAL Submitted (13-DEC-2016) Department of Pediatrics, Center of

Excellence in Clinical Virology, Faculty of Medicine, Chulalongkorn University, Bangkok 10330, Thailand

COMMENT ##Assembly-Data-START##

Assembly Method :: DNASTAR-Lasergene v. 6  
Sequencing Technology :: Sanger dideoxy sequencing  
##Assembly-Data-END##

FEATURES Location/Qualifiers

source 1..603  
/organism="Human respiratory syncytial virus B"  
/mol\_type="viral cRNA"  
/isolate="TH-CU/B10639/2014"  
/host="Homo sapiens"  
/db\_xref="taxon:208895"  
/country="Thailand"  
/collection\_date="12-Aug-2014"  
/note="group: B"

CDS <1..603  
/note="G protein"  
/codon\_start=1  
/product="attachment glycoprotein"  
/protein\_id="APY20426"  
/translation="IHTNSATISPNTKSETHHTTAQTKGTTSTSTQNNKPSTKPRPKN  
PPKKDDYHFEVFNFVPCSIGNNQLCKSICKTIPSNKPKKKPTTKPTNKPPTKTTNKR  
DPKTLAKTPKKENTINPTKEPTPKTTERDTSTPQSTVLDITTSKHTERDTSTSQSIVL  
DTTTSKHTTQQQLYSTTPENTPNSTQTPTASEPSTSNST"

ORIGIN

1 atccacacaa actcagccac aatataccac aatacaaaat cagaaacaca ccatacaaca  
61 gcacaaacca aaggcacaac ctctacttca acacagaaca acaagccaag cacaaaacca  
121 cgtccaaaaa atccacaaa aaaagatgat taccatttg aagtgttcaa cttgttccc  
181 ttagtatat gtggcaacaa tcaactctgc aatccattt gcaaaacaat accaagcaat  
241 aaaccaaaaga aaaaaccaac taaaaaaccc acaaacaaac cacctaccaa aaccacaaac  
301 aaaagagacc ccaaaacact agccaaaaca ccgaaaaaag aaaacaccat taaccaaca  
361 aaagaaccaa ccccaaagac tacagaaaga gacaccagca cccacaatc cactgtgctc  
421 gacataacca catcaaaaca cacagaaaga gacaccagca ctcacaatc cattgtgctt  
481 gacacaacca catcaaaaca cacaaccaa cagcaatctc tctactcaac cacccccgaa  
541 aacacacca actccacaca aacaccaca gcatccgagc cctccacate aaattctacc  
601 taa

//

LOCUS KY328086 603 bp cRNA linear VRL 13-DEC-2016  
DEFINITION Human respiratory syncytial virus B isolate B/TH-CU/B10640/2014  
attachment glycoprotein gene, partial cds.

ACCESSION KY328086

VERSION KY328086

KEYWORDS .

SOURCE Human respiratory syncytial virus B

ORGANISM Human respiratory syncytial virus B  
Viruses; ssRNA viruses; ssRNA negative-strand viruses;  
Mononegavirales; Pneumoviridae; Orthopneumovirus.

REFERENCE 1 (bases 1 to 603)

AUTHORS Thongpan,I., Mauleekoonphairoj,J., Vichiwattana,P., Korkong,S.,  
Vongpunawad,S. and Poovorawan,Y.

TITLE Molecular Characterization of Respiratory Syncytial Virus in  
Thailand, 2012-2015

JOURNAL Unpublished

REFERENCE 2 (bases 1 to 603)

AUTHORS Thongpan,I., Mauleekoonphairoj,J., Vichiwattana,P., Korkong,S.,  
Vongpunsawad,S. and Poovorawan,Y.

TITLE Direct Submission

JOURNAL Submitted (13-DEC-2016) Department of Pediatrics, Center of  
Excellence in Clinical Virology, Faculty of Medicine, Chulalongkorn  
University, Bangkok 10330, Thailand

COMMENT ##Assembly-Data-START##

Assembly Method :: DNASTAR-Lasergene v. 6  
Sequencing Technology :: Sanger dideoxy sequencing  
##Assembly-Data-END##

FEATURES Location/Qualifiers

source 1..603

/organism="Human respiratory syncytial virus B"  
/mol\_type="viral cRNA"  
/isolate="B/TH-CU/B10640/2014"  
/host="Homo sapiens"  
/db\_xref="taxon:208895"  
/country="Thailand"  
/collection\_date="12-Aug-2014"  
/note="group: B"

CDS <1..603

/note="G protein"  
/codon\_start=1  
/product="attachment glycoprotein"  
/protein\_id="APY20427"  
/translation="IHTNSATISPNTKSETHHTTAQTKGTTSTSTQNNKPSTKPRPKN  
PPKKDDYHFEVFNFPVPCISCGNNQLCKSICKTIPSNKPKKPTTKPTNKPPTKTTNKR  
DPKTLAKTPKKENTINPTKEPTPKTTERDSTPQSTVLDITTSKHTERDSTSTSQSIVL  
DTTTSKHTTQQQSLYSTTPENTPNSTQTPTASEPSTSNST"

ORIGIN

1 atccacacaa actcagccac aatatcacc aatacaaaat cagaaacaca ccatacaaca  
61 gcacaaacca aaggcacaac ctctacttca acacagaaca acaagccaag cacaaaacca  
121 cgtccaaaaa atccacaaa aaaagatgat taccatttg aagtgtcaa cttgttccc  
181 ttagtatat gtggcaacaa tcaactctgc aaatccattt gaaaacaat accaagcaat  
241 aaaccaaaaga aaaaaccaac taaaaaacc acaaacaaac cacctaccaa aaccacaaac  
301 aaaagagacc caaaacact agccaaaaca ccgaaaaaag aaaacacat taaccaaca  
361 aaagaaccaa cccaaagac tacagaaaga gacaccagca cccacaate cactgtgctc  
421 gacataacca catcaaaaca cacagaaaga gacaccagca cctcacaate cattgtgctt  
481 gacacaacca catcaaaaca cacaacccea cagcaatctc tetactcaac cacccccgaa  
541 aacacacca actccacaca aacaccaca geatccgagc cctccacatc aaattetacc  
601 taa

//

LOCUS KY328087 603 bp cRNA linear VRL 13-DEC-2016

DEFINITION Human respiratory syncytial virus B isolate TH-CU/C5164/2014  
attachment glycoprotein gene, partial cds.

ACCESSION KY328087

VERSION KY328087

KEYWORDS .

SOURCE Human respiratory syncytial virus B

ORGANISM Human respiratory syncytial virus B  
Viruses; ssRNA viruses; ssRNA negative-strand viruses;  
Mononegavirales; Pneumoviridae; Orthopneumovirus.

REFERENCE 1 (bases 1 to 603)

AUTHORS Thongpan,I., Mauleekoonphairoj,J., Vichiwattana,P., Korkong,S.,  
Vongpunsawad,S. and Poovorawan,Y.

TITLE Molecular Characterization of Respiratory Syncytial Virus in  
Thailand, 2012-2015

JOURNAL Unpublished

REFERENCE 2 (bases 1 to 603)

AUTHORS Thongpan,I., Mauleekoonphairoj,J., Vichiwattana,P., Korkong,S.,  
Vongpunsawad,S. and Poovorawan,Y.

TITLE Direct Submission

JOURNAL Submitted (13-DEC-2016) Department of Pediatrics, Center of  
Excellence in Clinical Virology, Faculty of Medicine, Chulalongkorn  
University, Bangkok 10330, Thailand

COMMENT ##Assembly-Data-START##

Assembly Method :: DNASTAR-Lasergene v. 6  
Sequencing Technology :: Sanger dideoxy sequencing  
##Assembly-Data-END##

FEATURES Location/Qualifiers

source 1..603  
/organism="Human respiratory syncytial virus B"  
/mol\_type="viral cRNA"  
/isolate="TH-CU/C5164/2014"  
/host="Homo sapiens"  
/db\_xref="taxon:208895"  
/country="Thailand"  
/collection\_date="01-Oct-2014"  
/note="group: B"

CDS <1..603  
/note="G protein"  
/codon\_start=1  
/product="attachment glycoprotein"  
/protein\_id="APY20428"  
/translation="IHTNSATISPNTKSETHHTTAQTKGTTSTPTQNNKPSTKPRPKN  
PPKKDDYHFEVFNFPVCSICGNNQLCKSICKTIPSNKPKKKPTTKPTNKPTTKTTNKR  
DLKTLAKTPKKETTINPTKKPTKTTTERDTSTPQSTVLDITTSKHTERDTSTSQSIAL  
DTTTSKHTTQQQLSYSTTPENTPNSTQTPTASEPSTSNST"

ORIGIN

1 atccacacaa actcagccac aatataccac aatacaaaat cagaaacaca ccatacaaca  
61 gcacaaacca aaggcacaac ctctactcca acacagaaca acaagccaag cacaaaacca  
121 cgtccaaaaa atccacaaa aaaagatgat tatcatttg aagtgttcaa cttgttccc  
181 tgtagtatat gtggcaacaa tcaactctgc aaatccattt gcaaaacaat accaagcaat  
241 aaaccaaaga aaaaaccaac tacaaaaccc acaaaacaac caactaccaa aaccacaaac  
301 aaaagagacc taaaacact agccaaaaca cggaaaaag aaaccacat taaccaaca  
361 aaaaaccaa ccccaagac tacagaaaga gacaccagca cccacaate cactgtgctc  
421 gacataacca catcaaaaca cacagaaaga gacaccagca cctcacaate cattgcgctc  
481 gacacaacca catcaaaaca cacaaccaa gagcaatctc ttactcaac ccccccgaa  
541 aacacacca actccacaca aacaccaca gcatccgagc cctccacatc aaattctacc  
601 taa

//

LOCUS KY328088 603 bp cRNA linear VRL 13-DEC-2016  
DEFINITION Human respiratory syncytial virus B isolate TH-CU/B10981/2014  
attachment glycoprotein gene, partial cds.

ACCESSION KY328088

VERSION KY328088

KEYWORDS .

SOURCE Human respiratory syncytial virus B  
 ORGANISM Human respiratory syncytial virus B  
 Viruses; ssRNA viruses; ssRNA negative-strand viruses;  
 Mononegavirales; Pneumoviridae; Orthopneumovirus.

REFERENCE 1 (bases 1 to 603)  
 AUTHORS Thongpan,I., Mauleekoonphairoj,J., Vichiwattana,P., Korkong,S.,  
 Vongpunsawad,S. and Poovorawan,Y.  
 TITLE Molecular Characterization of Respiratory Syncytial Virus in  
 Thailand, 2012-2015  
 JOURNAL Unpublished

REFERENCE 2 (bases 1 to 603)  
 AUTHORS Thongpan,I., Mauleekoonphairoj,J., Vichiwattana,P., Korkong,S.,  
 Vongpunsawad,S. and Poovorawan,Y.  
 TITLE Direct Submission  
 JOURNAL Submitted (13-DEC-2016) Department of Pediatrics, Center of  
 Excellence in Clinical Virology, Faculty of Medicine, Chulalongkorn  
 University, Bangkok 10330, Thailand

COMMENT ##Assembly-Data-START##  
 Assembly Method :: DNASTAR-Lasergene v. 6  
 Sequencing Technology :: Sanger dideoxy sequencing  
 ##Assembly-Data-END##

FEATURES Location/Qualifiers  
 source 1..603  
 /organism="Human respiratory syncytial virus B"  
 /mol\_type="viral cRNA"  
 /isolate="TH-CU/B10981/2014"  
 /host="Homo sapiens"  
 /db\_xref="taxon:208895"  
 /country="Thailand"  
 /collection\_date="11-Sep-2014"  
 /note="group: B"

CDS <1..603  
 /note="G protein"  
 /codon\_start=1  
 /product="attachment glycoprotein"  
 /protein\_id="APY20429"  
 /translation="IHTNSATISPNTKSETHHTTAQTKGTTSTPTQNNKPSTKPRPKN  
 PPKKDDYHFEVFNFPVCSICGNNQLCKSICKTIPSNKPKKKPTTKPTNKPTTKTTNKR  
 DLKTLAKTPKKETTINPTKKPTPKTTERDSTPQSTVLDITTSKHTERDTSTSQSIAL  
 DTTTSKHTTQQQSLYSTTPENTPNSTQTPTASEPSTSNST"

ORIGIN  
 1 atccacaaa actcagccac aatatcacc aatacaaat cagaacaca ccatacaaca  
 61 gcacaaacca aaggcacaac ctctactcca acacagaaca acaagccaag cacaaaacca  
 121 cgtccaaaaa atccacaaa aaaagatgat tatcatttg aagtgtcaa cttgttccc  
 181 tgtagtatat gtggcaacaa tcaactctgc aaatccattt gaaaacaat accaagcaat  
 241 aaaccaaaga aaaaccaac taaaaaccc acaacaagc caactaccaa aaccacaaac  
 301 aaaagagacc taaaacact agccaaaaca cggaaaaag aaaccacat taaccaaca  
 361 aaaaaaccaa ccccaagac tacagaaaga gacaccagca cccacaatc cactgtgctc  
 421 gacataacca catcaaaaca cacagaaaga gacaccagca ctcacaatc cattgcgctc  
 481 gacacaacca catcaaaaca cacaaccaa cagcaatctc ttactcaac cacccccgaa  
 541 aacacacca actccacaca aacaccaca geatccgagc ctccacatc aaattctacc  
 601 taa

//  
 LOCUS KY328089 603 bp cRNA linear VRL 13-DEC-2016

DEFINITION Human respiratory syncytial virus B isolate TH-CU/C4085/2013  
attachment glycoprotein gene, partial cds.

ACCESSION KY328089

VERSION KY328089

KEYWORDS .

SOURCE Human respiratory syncytial virus B

ORGANISM Human respiratory syncytial virus B

Viruses; ssRNA viruses; ssRNA negative-strand viruses;  
Mononegavirales; Pneumoviridae; Orthopneumovirus.

REFERENCE 1 (bases 1 to 603)

AUTHORS Thongpan,I., Mauleekoonphairoj,J., Vichiwattana,P., Korkong,S.,  
Vongpunsawad,S. and Poovorawan,Y.

TITLE Molecular Characterization of Respiratory Syncytial Virus in  
Thailand, 2012-2015

JOURNAL Unpublished

REFERENCE 2 (bases 1 to 603)

AUTHORS Thongpan,I., Mauleekoonphairoj,J., Vichiwattana,P., Korkong,S.,  
Vongpunsawad,S. and Poovorawan,Y.

TITLE Direct Submission

JOURNAL Submitted (13-DEC-2016) Department of Pediatrics, Center of  
Excellence in Clinical Virology, Faculty of Medicine, Chulalongkorn  
University, Bangkok 10330, Thailand

COMMENT ##Assembly-Data-START##

Assembly Method :: DNASTAR-Lasergene v. 6  
Sequencing Technology :: Sanger dideoxy sequencing  
##Assembly-Data-END##

FEATURES Location/Qualifiers

source 1..603

/organism="Human respiratory syncytial virus B"  
/mol\_type="viral cRNA"  
/isolate="TH-CU/C4085/2013"  
/host="Homo sapiens"  
/db\_xref="taxon:208895"  
/country="Thailand"  
/collection\_date="01-Oct-2013"  
/note="group: B"

CDS <1..603

/note="G protein"  
/codon\_start=1  
/product="attachment glycoprotein"  
/protein\_id="APY20430"  
/translation="IHTNSATISPNTKSETHHTTAQTKGRTSTPTQNNKPSTKPRPKN  
PPKKDDYHFEVFNFPVCSICGNNQLCKSICKTIPSNKPKKPTTKPTNKPPTKTTNKR  
DPKTLAKTPKKETTINPTKKPTKTTERTDSTPHSTVLDTTTTSKHTERDTSTSQSIAL  
DTTTSKHTTQQQSLYSTTPENTPNSTQTPTASEPSTSNST"

ORIGIN

1 atccacaaa actcagccac aatatacct aatacaaat cagaaacaca ccatacaaca  
61 gcacaaacca aaggcagaac ctactacca acacagaaca acaagccaag cacaaaacca  
121 cgtccaaaaa atccacaaa aaaagatgat taccatttg aagtgtcaa cttgtgcc  
181 ttagtatat gtggcaaca tcaactctgc aatccattt gaaaacaat accaagcaat  
241 aaaccaaga aaaaaccaac taaaaaacc acaacaacac cacctaccaa aaccacaaac  
301 aaaagagacc caaaacact agccaaaaca ccgaaaaag aaaccacat taaccaaca  
361 aaaaaccaa cccaagac cacagaaga gacaccagca cccacactc cactgtgctc  
421 gacacaaca catcaaaaca cacagaaga gacaccagca ctcacaatc cattgcgctt

481 gacacaacca catcaaaaca cacaacccaa cagcaatctc tctactcaac cacccccgaa  
541 aacacacca actccacaca aacaccaca gcatccgagc cctccacatc aaattctacc  
601 taa

//

LOCUS KY328090 603 bp cRNA linear VRL 13-DEC-2016  
DEFINITION Human respiratory syncytial virus B isolate TH-CU/C4078/2013  
attachment glycoprotein gene, partial cds.

ACCESSION KY328090

VERSION KY328090

KEYWORDS .

SOURCE Human respiratory syncytial virus B

ORGANISM Human respiratory syncytial virus B

Viruses; ssRNA viruses; ssRNA negative-strand viruses;  
Mononegavirales; Pneumoviridae; Orthopneumovirus.

REFERENCE 1 (bases 1 to 603)

AUTHORS Thongpan,I., Mauleekoonphairoj,J., Vichiwattana,P., Korkong,S.,  
Vongpunsawad,S. and Poovorawan,Y.

TITLE Molecular Characterization of Respiratory Syncytial Virus in  
Thailand, 2012-2015

JOURNAL Unpublished

REFERENCE 2 (bases 1 to 603)

AUTHORS Thongpan,I., Mauleekoonphairoj,J., Vichiwattana,P., Korkong,S.,  
Vongpunsawad,S. and Poovorawan,Y.

TITLE Direct Submission

JOURNAL Submitted (13-DEC-2016) Department of Pediatrics, Center of  
Excellence in Clinical Virology, Faculty of Medicine, Chulalongkorn  
University, Bangkok 10330, Thailand

COMMENT ##Assembly-Data-START##

Assembly Method :: DNASTAR-Lasergene v. 6  
Sequencing Technology :: Sanger dideoxy sequencing  
##Assembly-Data-END##

FEATURES Location/Qualifiers

source 1..603  
/organism="Human respiratory syncytial virus B"  
/mol\_type="viral cRNA"  
/isolate="TH-CU/C4078/2013"  
/host="Homo sapiens"  
/db\_xref="taxon:208895"  
/country="Thailand"  
/collection\_date="01-Sep-2013"  
/note="group: B"

CDS <1..603  
/note="G protein"  
/codon\_start=1  
/product="attachment glycoprotein"  
/protein\_id="APY20431"  
/translation="IHTNSATISPNTKSETHHTTAQTKGRTSTPTQNNKPSTKPRPKN  
PPKKDDYHFEVFNFVPCISCGNNQLCKSICKTIPSNKPKKKPTTKPTNKPPTKTTNKR  
DPKTLAKTPKKETTINPTKKPTPKTTERDTSTPQSTVLDTTTSKRTERDTSTSQSIAL  
DTTTSKHTTQQQLSYSTTPENTPNSTQTPTASEPSTSNST"

ORIGIN

1 atccacacaa actcagccac aatatcacct aatacaaaat cagaaacaca ccatacaaca  
61 gcacaaacca aaggcagaac ctctactcca acacagaaca acaagccaag cacaaaacca  
121 cgtcctcaaaa atccacaaa aaaagatgat taccatttg aagtgtcaa ctttgtccc

181 tgtagtatat gtggcaacaa tcaactctgc aaatccattt gcaaaacaat accaagcaat  
241 aaaccaaga aaaaaccaac tacaaaaccc acaaacaaac cacctaccaa aaccacaaac  
301 aaaagagacc ccaaaacact agccaaaaca ccgaaaaaag aaaccacat taaccaaca  
361 aaaaaacca cccccaagac cacagaaaga gacaccagca cccacaate cactgtgctc  
421 gacacaacca catcaaacg cacagaaaga gacaccagca ctcacaate cattgcgctt  
481 gacacaacca catcaaacacacaccaa cagcaatctc tctactcaac cacccccgaa  
541 aacacacca actccacaca aacaccaca geatccgagc cctccacate aaattctacc  
601 taa

//

LOCUS KY328091 603 bp cRNA linear VRL 13-DEC-2016

DEFINITION Human respiratory syncytial virus B isolate TH-CU410/2012  
attachment glycoprotein gene, partial cds.

ACCESSION KY328091

VERSION KY328091

KEYWORDS .

SOURCE Human respiratory syncytial virus B

ORGANISM Human respiratory syncytial virus B

Viruses; ssRNA viruses; ssRNA negative-strand viruses;  
Mononegavirales; Pneumoviridae; Orthopneumovirus.

REFERENCE 1 (bases 1 to 603)

AUTHORS Thongpan,I., Mauleekoonphairoj,J., Vichiwattana,P., Korkong,S.,  
Vongpunsawad,S. and Poovorawan,Y.

TITLE Molecular Characterization of Respiratory Syncytial Virus in  
Thailand, 2012-2015

JOURNAL Unpublished

REFERENCE 2 (bases 1 to 603)

AUTHORS Thongpan,I., Mauleekoonphairoj,J., Vichiwattana,P., Korkong,S.,  
Vongpunsawad,S. and Poovorawan,Y.

TITLE Direct Submission

JOURNAL Submitted (13-DEC-2016) Department of Pediatrics, Center of  
Excellence in Clinical Virology, Faculty of Medicine, Chulalongkorn  
University, Bangkok 10330, Thailand

COMMENT ##Assembly-Data-START##

Assembly Method :: DNASTAR-Lasergene v. 6  
Sequencing Technology :: Sanger dideoxy sequencing  
##Assembly-Data-END##

FEATURES Location/Qualifiers

source 1..603

/organism="Human respiratory syncytial virus B"

/mol\_type="viral cRNA"

/isolate="TH-CU410/2012"

/host="Homo sapiens"

/db\_xref="taxon:208895"

/country="Thailand"

/collection\_date="01-Aug-2012"

/note="group: B"

CDS <1..603

/note="G protein"

/codon\_start=1

/product="attachment glycoprotein"

/protein\_id="APY20432"

/translation="IHTNSATISPNTKSETHHTTAQTKGRTSTPTQNNKPSTKPRPKN

PPKKDDYHFEVFNFPVPCISCGNNQLCKSICKTIPSNKPKKKPTTKPTNKPPTKTTNKR

DPKTLAKTPKKETTINPTKKPTKPTTERDTSTPQSTVLDTTTTSKHTERDTSTSQSIAL



DTTTSKHTTQQQSLYSTTPENTPNSTQTPTASEPSTSNSST"

ORIGIN

1 atccacacaa actcagccac aatatacct aatacaaat cagaaacaca ccatacaaca  
61 gcacaaacca aaggcagaac ctctactcca acacagaaca acaagccaag cacaaaaacca  
121 cgtccaaaaa atccacaaa aaaagatgat taccatttg aagtgtcaa cttgtgcc  
181 ttagtatat gtggcaaca tcaactctgc aaatccattt gcaaaacaat accaagcaat  
241 aaaccaaaaga aaaaaccaac taaaaaccc acaaacaaac cacctaccaa aaccacaaac  
301 aaaagagacc ccaaaacact agccaaaaca ccgaaaaaag aaaccacat taaccaaca  
361 aaaaaaccaa ccccaagac cacagaaga gacaccagca cccacaatc cactgtgetc  
421 gacacaacca catcaaaaca cacagaaaga gacaccagca cctcacaatc cattgcgctt  
481 gacacaacca catcaaaaca cacaaccaa cagcaatctc tctactcaac cacccccgaa  
541 aacacacca actccacaca aacaccaca gcatccgagc cctccacatc aaattctacc  
601 taa

//

LOCUS KY328092 603 bp cRNA linear VRL 13-DEC-2016

DEFINITION Human respiratory syncytial virus B isolate TH-CU468/2012  
attachment glycoprotein gene, partial cds.

ACCESSION KY328092

VERSION KY328092

KEYWORDS .

SOURCE Human respiratory syncytial virus B

ORGANISM Human respiratory syncytial virus B

Viruses; ssRNA viruses; ssRNA negative-strand viruses;  
Mononegavirales; Pneumoviridae; Orthopneumovirus.

REFERENCE 1 (bases 1 to 603)

AUTHORS Thongpan,I., Mauleekoonphairoj,J., Vichiwattana,P., Korkong,S.,  
Vongpunsawad,S. and Poovorawan,Y.

TITLE Molecular Characterization of Respiratory Syncytial Virus in  
Thailand, 2012-2015

JOURNAL Unpublished

REFERENCE 2 (bases 1 to 603)

AUTHORS Thongpan,I., Mauleekoonphairoj,J., Vichiwattana,P., Korkong,S.,  
Vongpunsawad,S. and Poovorawan,Y.

TITLE Direct Submission

JOURNAL Submitted (13-DEC-2016) Department of Pediatrics, Center of  
Excellence in Clinical Virology, Faculty of Medicine, Chulalongkorn  
University, Bangkok 10330, Thailand

COMMENT ##Assembly-Data-START##

Assembly Method :: DNASTAR-Lasergene v. 6  
Sequencing Technology :: Sanger dideoxy sequencing  
##Assembly-Data-END##

FEATURES Location/Qualifiers

source 1..603  
/organism="Human respiratory syncytial virus B"  
/mol\_type="viral cRNA"  
/isolate="TH-CU468/2012"  
/host="Homo sapiens"  
/db\_xref="taxon:208895"  
/country="Thailand"  
/collection\_date="01-Sep-2012"  
/note="group: B"  
CDS <1..603  
/note="G protein"  
/codon\_start=1

/product="attachment glycoprotein"  
/protein\_id="APY20433"  
/translation="IHTNSATISPNTKSETHHTTAQTKGRTSTPTQNNKPSTKPRPKN  
PPKKDDYHFEVFNFPVPCISICGNNQLCKSICKTIPSNKPKKKPTTKPTNKPPTKTTNKR  
DPKTLAKTPKKETTINPTKKPTKTTTERDSTPQSTVLDTTTSKHTERDSTSQSIAL  
DTTTSKHTTQQQSLYSTTPENTPNSTQTPTASEPSTSNST"

ORIGIN

1 atccacaaa actcagccac aatatcacct aatacaaaat cagaaacaca ccatacaaca  
61 gcacaaacca aaggcagaac ctctactcca acacagaaca acaagccaag cacaaaaacca  
121 cgtccaaaaa atccacaaa aaaagatgat taccatttg aagtgtcaa cttgttccc  
181 ttagtatat gtggcaacaa tcaactctgc aatccattt gaaaaacaat accaagcaat  
241 aaaccaaaaga aaaaaccaac tacaaaaccc acaaacaaac cacctaccaa aaccacaaac  
301 aaaagagacc caaaacact agccaaaaca ccgaaaaaag aaaccacat taaccaaca  
361 aaaaaaccaa ccccaagac cacagaaaga gacaccagca cccacaatc cactgtgctc  
421 gacacaacca catcaaaaca cacagaaaga gacaccagca ctcacaatc cattgctt  
481 gacacaacca catcaaaaca cacaaccaa cagcaatctc ttactcaac cacccccgaa  
541 aacacacca actccacaca aacaccaca geatccgagc cctccacatc aaattetacc  
601 taa

//

LOCUS KY328093 603 bp cRNA linear VRL 13-DEC-2016

DEFINITION Human respiratory syncytial virus B isolate TH-CU404/2012  
attachment glycoprotein gene, partial cds.

ACCESSION KY328093

VERSION KY328093

KEYWORDS .

SOURCE Human respiratory syncytial virus B

ORGANISM Human respiratory syncytial virus B

Viruses; ssRNA viruses; ssRNA negative-strand viruses;  
Mononegavirales; Pneumoviridae; Orthopneumovirus.

REFERENCE 1 (bases 1 to 603)

AUTHORS Thongpan,I., Mauleekoonphairoj,J., Vichiwattana,P., Korkong,S.,  
Vongpunsawad,S. and Poovorawan,Y.

TITLE Molecular Characterization of Respiratory Syncytial Virus in  
Thailand, 2012-2015

JOURNAL Unpublished

REFERENCE 2 (bases 1 to 603)

AUTHORS Thongpan,I., Mauleekoonphairoj,J., Vichiwattana,P., Korkong,S.,  
Vongpunsawad,S. and Poovorawan,Y.

TITLE Direct Submission

JOURNAL Submitted (13-DEC-2016) Department of Pediatrics, Center of  
Excellence in Clinical Virology, Faculty of Medicine, Chulalongkorn  
University, Bangkok 10330, Thailand

COMMENT ##Assembly-Data-START##

Assembly Method :: DNASTAR-Lasergene v. 6  
Sequencing Technology :: Sanger dideoxy sequencing  
##Assembly-Data-END##

FEATURES Location/Qualifiers

source 1..603

/organism="Human respiratory syncytial virus B"

/mol\_type="viral cRNA"

/isolate="TH-CU404/2012"

/host="Homo sapiens"

/db\_xref="taxon:208895"

/country="Thailand"

/collection\_date="01-Aug-2012"  
/note="group: B"  
CDS <1..603  
/note="G protein"  
/codon\_start=1  
/product="attachment glycoprotein"  
/protein\_id="APY20434"  
/translation="IHTNSATISPNTKSETHHTTAQTKGRTSTPTQNNKPSTKPRPKN  
PPKKDDYHFEVFNFPVCSICGNNQLCKSICKTIPSNPKPKKPTTKPTNKPPTKTTNKR  
DPKTLAKTPKKETTINPTKKPTKPTTERDTSTPQSTVLDTTTSKHTERDTSTSQSIAL  
DTTTSKHTTQQQSLYSTTPENTPNSTQTPTASEPSTSNST"

ORIGIN

1 atccacacaa actcagccac aatatacct aatacaaat cagaacacaca ccatacaaca  
61 gcacaaacca aaggcagaac ctctactcca acacagaaca acaagccaag cacaaaacca  
121 cgtccaaaaa atccacaaa aaaagatgat taccattttg aagtgtcaa ctttgtccc  
181 tgtagtatat gtggcaacaa tcaactctgc aaatccattt gcaaaacaat accaagcaat  
241 aaaccaaaaga aaaaaccaac tacaaaacc acaaacacac cacctaccaa aaccacaaac  
301 aaaagagacc ccaaaacact agccaaaaca ccgaaaaaag aaaccacat taaccaaca  
361 aaaaaaccaa ccccaagac cacagaaaga gacaccagca cccacaatc cactgtgctc  
421 gacacaacca catcaaaaca cacagaaaga gacaccagca cctacaatc cattgcgett  
481 gacacaacca catcaaaaca cacaaccaa cagcaatctc tctactcaac cacccccgaa  
541 aacacacca actccacaca aacaccaca gcatccgagc cctccacatc aaattctacc  
601 taa

//

LOCUS KY328094 603 bp cRNA linear VRL 13-DEC-2016

DEFINITION Human respiratory syncytial virus B isolate TH-CU/C4014/2013  
attachment glycoprotein gene, partial cds.

ACCESSION KY328094

VERSION KY328094

KEYWORDS .

SOURCE Human respiratory syncytial virus B

ORGANISM Human respiratory syncytial virus B

Viruses; ssRNA viruses; ssRNA negative-strand viruses;  
Mononegavirales; Pneumoviridae; Orthopneumovirus.

REFERENCE 1 (bases 1 to 603)

AUTHORS Thongpan,I., Mauleekoonphairoj,J., Vichiwattana,P., Korkong,S.,  
Vongpunsawad,S. and Poovorawan,Y.

TITLE Molecular Characterization of Respiratory Syncytial Virus in  
Thailand, 2012-2015

JOURNAL Unpublished

REFERENCE 2 (bases 1 to 603)

AUTHORS Thongpan,I., Mauleekoonphairoj,J., Vichiwattana,P., Korkong,S.,  
Vongpunsawad,S. and Poovorawan,Y.

TITLE Direct Submission

JOURNAL Submitted (13-DEC-2016) Department of Pediatrics, Center of  
Excellence in Clinical Virology, Faculty of Medicine, Chulalongkorn  
University, Bangkok 10330, Thailand

COMMENT ##Assembly-Data-START##

Assembly Method :: DNASTAR-Lasergene v. 6  
Sequencing Technology :: Sanger dideoxy sequencing  
##Assembly-Data-END##

FEATURES Location/Qualifiers

source 1..603

/organism="Human respiratory syncytial virus B"

/mol\_type="viral cRNA"  
/isolate="TH-CU/C4014/2013"  
/host="Homo sapiens"  
/db\_xref="taxon:208895"  
/country="Thailand"  
/collection\_date="01-Aug-2013"  
/note="group: B"

CDS <1..603  
/note="G protein"  
/codon\_start=1  
/product="attachment glycoprotein"  
/protein\_id="APY20435"  
/translation="IHTNSATISPNTKSETHHTTAQTKGRTSTPTQNNKPSTKPRPKN  
PPKKDDYHFEVFNFPVPCISGNNQLCKSICKTIPSNKPKKKPTTKPTNKPTKTTNKR  
DPKTLAKTPKKETTINPTKKPTKTTTERDTSTPQSTVLDTTTTSKHTERDTSTSQSIAL  
DTTTSKHTTQQQSLYSTTPENTPNSTQTPTASEPSTSNSST"

#### ORIGIN

1 atccacaaa actcagccac aatatacct aatacaaat cagaacaca ccatacaaca  
61 gcacaaacca aaggcgaac ctctactcca acacagaaca acaagccaag cacaaaacca  
121 cgtcAAAAAA atccacaaa aaaagatgat taccatttg aagtggtcaa cttgtgcc  
181 tgtagtatat gtggcaacaa tcaactctgc aaatccattt gcaaaacaat accaagcaat  
241 aaaccaaaga aaaaaccaac taaaaaccc acaaacaaac cacctacaa aaccacaaac  
301 aaaagagacc caaaacact agccaaaaca cgaAAAAAag aaaccacat taaccaaca  
361 aaaaaaccaa ccccaagac cacagaaaga gacaccagca cccacaate cactgtgctc  
421 gacacaacca catcaaaaca cacagaaaga gacaccagca ctcacaate cattgcgctt  
481 gacacaacca catcaaaaca cacaaccaa cagcaatctc ttactcaac cacccccgaa  
541 aacacacca actccacaca aacaccaca geatccgagc cctccacate aaattctacc  
601 taa

//

LOCUS KY328095 603 bp cRNA linear VRL 13-DEC-2016

DEFINITION Human respiratory syncytial virus B isolate TH-CU485/2012  
attachment glycoprotein gene, partial cds.

ACCESSION KY328095

VERSION KY328095

KEYWORDS .

SOURCE Human respiratory syncytial virus B

ORGANISM Human respiratory syncytial virus B

Viruses; ssRNA viruses; ssRNA negative-strand viruses;  
Mononegavirales; Pneumoviridae; Orthopneumovirus.

REFERENCE 1 (bases 1 to 603)

AUTHORS Thongpan,I., Mauleekoonphairoj,J., Vichiwattana,P., Korkong,S.,  
Vongpunsawad,S. and Poovorawan,Y.

TITLE Molecular Characterization of Respiratory Syncytial Virus in  
Thailand, 2012-2015

JOURNAL Unpublished

REFERENCE 2 (bases 1 to 603)

AUTHORS Thongpan,I., Mauleekoonphairoj,J., Vichiwattana,P., Korkong,S.,  
Vongpunsawad,S. and Poovorawan,Y.

TITLE Direct Submission

JOURNAL Submitted (13-DEC-2016) Department of Pediatrics, Center of  
Excellence in Clinical Virology, Faculty of Medicine, Chulalongkorn  
University, Bangkok 10330, Thailand

COMMENT ##Assembly-Data-START##

Assembly Method :: DNASTAR-Lasergene v. 6

Sequencing Technology :: Sanger dideoxy sequencing

##Assembly-Data-END##

FEATURES            Location/Qualifiers  
source            1..603  
                  /organism="Human respiratory syncytial virus B"  
                  /mol\_type="viral cRNA"  
                  /isolate="TH-CU485/2012"  
                  /host="Homo sapiens"  
                  /db\_xref="taxon:208895"  
                  /country="Thailand"  
                  /collection\_date="01-Oct-2012"  
                  /note="group: B"  
CDS                <1..603  
                  /note="G protein"  
                  /codon\_start=1  
                  /product="attachment glycoprotein"  
                  /protein\_id="APY20436"  
                  /translation="IHTNSATISPNTKSETHHTTAQTKGRTSTPTQNNKPSTKPRPKN  
                  PPKKDDYHFEVFNFVPCISCGNNQLCKSICKTIPSNKPKKPTTKPTNKPPTKTTNKR  
                  DPKTLAKTPKKETTINPTKKPTKTTTERDTSTPQSTVLDTTTSKHTERDTSTSQSIAL  
                  DTTTSKHTTQQQSLYSTTPENTPNSTQTPTASEPSTSNST"

ORIGIN

1 atccacacaa actcagccac aatatacct aatacaaat cagaacacac ccatacaaca  
61 gcacaaacca aaggcagaac ctctactcca acacagaaca acaagccaag cacaaaacca  
121 cgtccaaaaa atccacaaa aaaagatgat taccatttg aagtgtcaa cttgtgcc  
181 ttagtatat gtggcaacaa tcaactctgc aaatccattt gcaaaacaat accaagcaat  
241 aaaccaaaaga aaaaaccaac taaaaaaccc acaaacaaac cacctaccaa aaccacaaac  
301 aaaagagacc caaaacact agccaaaaca ccgaaaaaag aaaccacat taaccaaca  
361 aaaaaaccaa cccaagac cacagaaga gacaccagca cccacaatc cactgtgetc  
421 gacacaacca catcaaaaca cacagaaga gacaccagca ctcacaatc cattgcgctt  
481 gacacaacca catcaaaaca cacaaccaa cagcaatctc tctactcaac cacccccgaa  
541 aacacacca actccacaca aacaccaca gcatccgagc cctccacatc aaattctacc  
601 taa

//

LOCUS    KY328096            603 bp    cRNA    linear    VRL 13-DEC-2016

DEFINITION Human respiratory syncytial virus B isolate TH-CU405/2012  
                  attachment glycoprotein gene, partial cds.

ACCESSION KY328096

VERSION    KY328096

KEYWORDS    .

SOURCE    Human respiratory syncytial virus B

ORGANISM Human respiratory syncytial virus B

Viruses; ssRNA viruses; ssRNA negative-strand viruses;  
Mononegavirales; Pneumoviridae; Orthopneumovirus.

REFERENCE 1 (bases 1 to 603)

AUTHORS Thongpan,I., Mauleekoonphairoj,J., Vichiwattana,P., Korkong,S.,  
Vongpunsawad,S. and Poovorawan,Y.

TITLE Molecular Characterization of Respiratory Syncytial Virus in  
Thailand, 2012-2015

JOURNAL Unpublished

REFERENCE 2 (bases 1 to 603)

AUTHORS Thongpan,I., Mauleekoonphairoj,J., Vichiwattana,P., Korkong,S.,  
Vongpunsawad,S. and Poovorawan,Y.

TITLE Direct Submission

JOURNAL Submitted (13-DEC-2016) Department of Pediatrics, Center of Excellence in Clinical Virology, Faculty of Medicine, Chulalongkorn University, Bangkok 10330, Thailand

COMMENT ##Assembly-Data-START##

Assembly Method :: DNASTAR-Lasergene v. 6  
Sequencing Technology :: Sanger dideoxy sequencing  
##Assembly-Data-END##

FEATURES Location/Qualifiers

source 1..603  
/organism="Human respiratory syncytial virus B"  
/mol\_type="viral cRNA"  
/isolate="TH-CU405/2012"  
/host="Homo sapiens"  
/db\_xref="taxon:208895"  
/country="Thailand"  
/collection\_date="01-Aug-2012"  
/note="group: B"

CDS <1..603  
/note="G protein"  
/codon\_start=1  
/product="attachment glycoprotein"  
/protein\_id="APY20437"  
/translation="IHTNSATISPNTKSETHHTTAQTKGRTSTPTQNNKPSTKPRPKN  
PPKKDDYHFEVFNFPVPCISGNNQLCKSICKTIPSNKPKKKPTTKPTNKPPTKTTNKR  
DPKTLAKTPKKETTINPTKKPTKTTERTDSTPQSTVLDTTTSKHETERDTSTSQSIAL  
DTTTSKHTTQQQLSYSTTPENTPNSTQTPTASEPSTSNST"

ORIGIN

1 atccacacaa actcagccac aatatcacct aatacaaaat cagaaacaca ccatacaaca  
61 gcacaaacca aaggcagaac ctctactcca acacagaaca acaagccaag cacaaaacca  
121 cgtccaaaaa atccacaaa aaaagatgat taccatttg aagtgtcaa cttgttccc  
181 tgtagtatat gtggcaacaa tcaactctgc aatccattt gcaaaacaat accaagcaat  
241 aaaccaaaaga aaaaaccaac tacaaaacc acaaacaaac cacctaccaa aaccacaaac  
301 aaaagagacc caaaacact agccaaaaca ccgaaaaaag aaaccacat taaccaaca  
361 aaaaaccaa ccccaagac cacagaaaga gacaccagca cccacaatc cactgtgctc  
421 gacacaacca catcaaaaca cacagaaaga gacaccagca ctcacaatc cattgcgctt  
481 gacacaacca catcaaaaca cacaaccaa cagcaatctc ttactcaac cacccccgaa  
541 aacacacca actccacaca aacaccaca geatccgagc cctccacatc aaattctacc  
601 taa

//

LOCUS KY328097 603 bp cRNA linear VRL 13-DEC-2016

DEFINITION Human respiratory syncytial virus B isolate TH-CU460/2012  
attachment glycoprotein gene, partial cds.

ACCESSION KY328097

VERSION KY328097

KEYWORDS .

SOURCE Human respiratory syncytial virus B

ORGANISM Human respiratory syncytial virus B  
Viruses; ssRNA viruses; ssRNA negative-strand viruses;  
Mononegavirales; Pneumoviridae; Orthopneumovirus.

REFERENCE 1 (bases 1 to 603)

AUTHORS Thongpan,I., Mauleekoonphairoj,J., Vichiwattana,P., Korkong,S.,  
Vongpunawad,S. and Poovorawan,Y.

TITLE Molecular Characterization of Respiratory Syncytial Virus in  
Thailand, 2012-2015

JOURNAL Unpublished  
REFERENCE 2 (bases 1 to 603)  
AUTHORS Thongpan,I., Mauleekoonphairoj,J., Vichiwattana,P., Korkong,S.,  
Vongpunsawad,S. and Poovorawan,Y.  
TITLE Direct Submission  
JOURNAL Submitted (13-DEC-2016) Department of Pediatrics, Center of  
Excellence in Clinical Virology, Faculty of Medicine, Chulalongkorn  
University, Bangkok 10330, Thailand  
COMMENT ##Assembly-Data-START##  
Assembly Method :: DNASTAR-Lasergene v. 6  
Sequencing Technology :: Sanger dideoxy sequencing  
##Assembly-Data-END##  
FEATURES Location/Qualifiers  
source 1..603  
/organism="Human respiratory syncytial virus B"  
/mol\_type="viral cRNA"  
/isolate="TH-CU460/2012"  
/host="Homo sapiens"  
/db\_xref="taxon:208895"  
/country="Thailand"  
/collection\_date="01-Sep-2012"  
/note="group: B"  
CDS <1..603  
/note="G protein"  
/codon\_start=1  
/product="attachment glycoprotein"  
/protein\_id="APY20438"  
/translation="IHTNSATISPNTKSETHHTTAQTKGRTSTPTQNNKPSTKPRPKN  
PPKKDDYHFEVFNFPVCSICGNNQLCKSICKTIPSNKPKKKPTTKPTNKPTKTNNKR  
DPKTLAKTPKKETTINPTKKPTPKTTERDTSTPQSTVLDTTTSKHTERDTSTSQSIAL  
DTTTSKHTTQQQSLYSTTPENTPNSTQTPTASEPSTSNST"  
ORIGIN  
1 atccacaaa actcagccac aatatacct aatacaaat cagaacaca ccatacaaca  
61 gcacaaacca aaggcagaac ctctactcca acacagaaca acaagccaag cacaaaacca  
121 cgtccaaaaa atccacaaa aaaagatgat taccatttg aagtgtcaa ctttgtccc  
181 tgtagtatat gtggcaacaa tcaactctgc aaatccattt gcaaaacaat accaagcaat  
241 aaaccaaaga aaaaaccaac taaaaaccc acaaacaaac cacctaccaa aaccacaaac  
301 aaaagagacc caaaacact agccaaaaca ccgaaaaaag aaaccacat taaccaaca  
361 aaaaaacca ccccaagac cacagaaaga gacaccagca cccacaate cactgtgctc  
421 gacacaacca catcaaaaca cacagaaaga gacaccagca cctcacaatc cattgcgett  
481 gacacaacca catcaaaaca cacaaccaa cagcaatctc ttactcaac ccccccgaa  
541 aacacacca actccacaca aacaccaca gcatccgagc cctccacatc aaattctacc  
601 taa  
//  
LOCUS KY328098 603 bp cRNA linear VRL 13-DEC-2016  
DEFINITION Human respiratory syncytial virus B isolate TH-CU/C4149/2013  
attachment glycoprotein gene, partial cds.  
ACCESSION KY328098  
VERSION KY328098  
KEYWORDS .  
SOURCE Human respiratory syncytial virus B  
ORGANISM Human respiratory syncytial virus B  
Viruses; ssRNA viruses; ssRNA negative-strand viruses;  
Mononegavirales; Pneumoviridae; Orthopneumovirus.

REFERENCE 1 (bases 1 to 603)

AUTHORS Thongpan,I., Mauleekoonphairoj,J., Vichiwattana,P., Korkong,S.,  
Vongpunsawad,S. and Poovorawan,Y.

TITLE Molecular Characterization of Respiratory Syncytial Virus in  
Thailand, 2012-2015

JOURNAL Unpublished

REFERENCE 2 (bases 1 to 603)

AUTHORS Thongpan,I., Mauleekoonphairoj,J., Vichiwattana,P., Korkong,S.,  
Vongpunsawad,S. and Poovorawan,Y.

TITLE Direct Submission

JOURNAL Submitted (13-DEC-2016) Department of Pediatrics, Center of  
Excellence in Clinical Virology, Faculty of Medicine, Chulalongkorn  
University, Bangkok 10330, Thailand

COMMENT ##Assembly-Data-START##

Assembly Method :: DNASTAR-Lasergene v. 6  
Sequencing Technology :: Sanger dideoxy sequencing  
##Assembly-Data-END##

FEATURES Location/Qualifiers

source 1..603  
/organism="Human respiratory syncytial virus B"  
/mol\_type="viral cRNA"  
/isolate="TH-CU/C4149/2013"  
/host="Homo sapiens"  
/db\_xref="taxon:208895"  
/country="Thailand"  
/collection\_date="01-Sep-2013"  
/note="group: B"

CDS <1..603  
/note="G protein"  
/codon\_start=1  
/product="attachment glycoprotein"  
/protein\_id="APY20439"  
/translation="IHTNSATISPNTKSETHHTTAQTKGRTSTPTQNNKPSTKPRPKN  
PPKKDDYHFEVFNFPVCSICGNNQLCKSICKTIPSNPKPKKPTTKPTNKPPTKTTNKR  
DPKTLAKTPKKETTINPTKKPTKTTERTDTSTPQSTVLDTTTTSKHTERDTSTSQSIAL  
DTTTSKHTTQQQSLYSTTPENTPNSTQTPTASEPSTSNST"

ORIGIN

1 atccacacaa actcagccac aatatacct aatacaaaat cagaacacac ccatacaaca  
61 gcacaaacca aaggcagaac ctctactcca acacagaaca acaagccaag cacaaaacca  
121 cgtccaaaaa atccacaaa aaaagatgat taccatttg aagtgtcaa cttgtgcc  
181 ttagtatat gtggcaacaa tcaactctgc aaatccattt gcaaacaaat accaagcaat  
241 aaaccaaaaga aaaaaccaac taaaaaaccc acaaacaaac cacctaccaa aaccacaaac  
301 aaaagagacc caaaacact agccaaaaca ccgaaaaaag aaaccacat taaccaaca  
361 aaaaaaccaa ccccaagac cacagaaaga gacaccagca cccacaate cactgtgctc  
421 gacacaacca catcaaaaca cacagaaaga gacaccagca ctcacaate cattgctt  
481 gacacaacca catcaaaaca cacaaccaa cagcaatctc ttactcaac ccccccgaa  
541 aacacacca actccacaca aacaccaca geatccgagc cctccacac aaattctacc  
601 taa

//

LOCUS KY328099 603 bp cRNA linear VRL 13-DEC-2016

DEFINITION Human respiratory syncytial virus B isolate TH-CU/C3137/2012  
attachment glycoprotein gene, partial cds.

ACCESSION KY328099

VERSION KY328099



KEYWORDS

SOURCE Human respiratory syncytial virus B

ORGANISM Human respiratory syncytial virus B

Viruses; ssRNA viruses; ssRNA negative-strand viruses;  
Mononegavirales; Pneumoviridae; Orthopneumovirus.

REFERENCE 1 (bases 1 to 603)

AUTHORS Thongpan,I., Mauleekoonphairoj,J., Vichiwattana,P., Korkong,S.,  
Vongpunsawad,S. and Poovorawan,Y.

TITLE Molecular Characterization of Respiratory Syncytial Virus in  
Thailand, 2012-2015

JOURNAL Unpublished

REFERENCE 2 (bases 1 to 603)

AUTHORS Thongpan,I., Mauleekoonphairoj,J., Vichiwattana,P., Korkong,S.,  
Vongpunsawad,S. and Poovorawan,Y.

TITLE Direct Submission

JOURNAL Submitted (13-DEC-2016) Department of Pediatrics, Center of  
Excellence in Clinical Virology, Faculty of Medicine, Chulalongkorn  
University, Bangkok 10330, Thailand

COMMENT ##Assembly-Data-START##

Assembly Method :: DNASTAR-Lasergene v. 6  
Sequencing Technology :: Sanger dideoxy sequencing  
##Assembly-Data-END##

FEATURES Location/Qualifiers

source 1..603

/organism="Human respiratory syncytial virus B"  
/mol\_type="viral cRNA"  
/isolate="TH-CU/C3137/2012"  
/host="Homo sapiens"  
/db\_xref="taxon:208895"  
/country="Thailand"  
/collection\_date="01-Aug-2012"  
/note="group: B"

CDS <1..603

/note="G protein"  
/codon\_start=1  
/product="attachment glycoprotein"  
/protein\_id="APY20440"  
/translation="IHTNSATISPNTKSETHHTTAQTKGRTSTPTQNNKPSTKPRPKN  
PPKKDDYHFEVFNFPVPCISICGNNQLCKSICKTIPSNKPKKKPTTKPTNKPPTKTTNKR  
DPKTLAKTPKKETTINPTKKPTKTTERTDSTPQSTVLDTTTTSKHTERDTSTSQSIAL  
DTTTSKHTTQQQSLYSTTPENTPNSTQTPTASEPSTSNST"

ORIGIN

1 atccacacaa actcagccac aatatacct aatacaaat cagaaacaca ccatacaaca  
61 gcacaaacca aaggcagaac ctctactcca acacagaaca acaagccaag cacaaaacca  
121 cgtccaaaaa atccacaaa aaaagatgat taccatttg aagtgtcaa cttgtgcc  
181 ttagtatat gtggcaacaa tcaactctgc aatccattt gcaaaacaat accaagcaat  
241 aaaccaaaaga aaaaaccaac taaaaaaccc acaaacaaac cacctaccaa aaccacaaac  
301 aaaagagacc caaaacact agccaaaaca ccgaaaaaag aaaccacat taaccaaca  
361 aaaaaaccaa cccaagac cacagaaga gacaccagca cccacaatc cactgtgetc  
421 gacacaacca catcaaaaca cacagaaaga gacaccagca ctcacaatc cattgcgctt  
481 gacacaacca catcaaaaca cacaaccaa cagcaatctc tctactcaac cacccccgaa  
541 aacacacca actccacaca aacaccaca gcatccgagc cctccacatc aaattctacc  
601 taa

//

LOCUS KY328100 603 bp cRNA linear VRL 13-DEC-2016  
DEFINITION Human respiratory syncytial virus B isolate TH-CU/C4153/2013  
attachment glycoprotein gene, partial cds.

ACCESSION KY328100

VERSION KY328100

KEYWORDS .

SOURCE Human respiratory syncytial virus B

ORGANISM Human respiratory syncytial virus B

Viruses; ssRNA viruses; ssRNA negative-strand viruses;  
Mononegavirales; Pneumoviridae; Orthopneumovirus.

REFERENCE 1 (bases 1 to 603)

AUTHORS Thongpan,I., Mauleekoonphairoj,J., Vichiwattana,P., Korkong,S.,  
Vongpunsawad,S. and Poovorawan,Y.

TITLE Molecular Characterization of Respiratory Syncytial Virus in  
Thailand, 2012-2015

JOURNAL Unpublished

REFERENCE 2 (bases 1 to 603)

AUTHORS Thongpan,I., Mauleekoonphairoj,J., Vichiwattana,P., Korkong,S.,  
Vongpunsawad,S. and Poovorawan,Y.

TITLE Direct Submission

JOURNAL Submitted (13-DEC-2016) Department of Pediatrics, Center of  
Excellence in Clinical Virology, Faculty of Medicine, Chulalongkorn  
University, Bangkok 10330, Thailand

COMMENT ##Assembly-Data-START##

Assembly Method :: DNASTAR-Lasergene v. 6  
Sequencing Technology :: Sanger dideoxy sequencing  
##Assembly-Data-END##

FEATURES Location/Qualifiers

source 1..603

/organism="Human respiratory syncytial virus B"  
/mol\_type="viral cRNA"  
/isolate="TH-CU/C4153/2013"  
/host="Homo sapiens"  
/db\_xref="taxon:208895"  
/country="Thailand"  
/collection\_date="01-Sep-2013"  
/note="group: B"

CDS <1..603

/note="G protein"  
/codon\_start=1  
/product="attachment glycoprotein"  
/protein\_id="APY20441"  
/translation="IHTNSATISPNTKSETHHTTAQTKGRTSTPTQNNKPSTKPRPKN  
PPKKDDYHFEVFNFPVPCISCGNNQLCKSICKTIPSNKPKKPTTKPTNKPPTKTTNKR  
DPKTLAKTPKKETTINPTKKPTPKTTERDSTPQSTVLDTTTSKHTERDSTSQSIAL  
DTTTSKHTTQQQSLYSTTPENTPNSTQTPTASEPSTSNST"

ORIGIN

1 atccacaaa actcagccac aatatcacct aatacaaaat cagaaacaca ccatacaaca  
61 gcacaaacca aaggcagaac ctctactcca acacagaaca acaagccaag cacaaaacca  
121 cgtccaaaaa atccacaaa aaaagatgat taccatttg aagtgtcaa cttgttccc  
181 ttagtatat gtggcaaca tcaactctgc aatccattt gaaaacaat accaagcaat  
241 aaaccaaaaga aaaaaccaac taaaaaaccc acaaacaaac cacctaccaa aaccacaaac  
301 aaaagagacc caaaacact agccaaaaca ccgaaaaaag aaaccacat taaccaaca  
361 aaaaaaccaa cccaagac cacagaaaga gacaccagca cccacaatc cactgtgctc

421 gacacaacca catcaaaaca cacagaaaga gaccaccagca cctcacaate cattgcgctt  
481 gacacaacca catcaaaaca cacaacccaa cagcaatctc tctactcaac cacccccgaa  
541 aacacacca actccacaca aacaccaca gcatccgagc cctccacate aaattctacc  
601 taa

//

LOCUS KY328101 603 bp cRNA linear VRL 13-DEC-2016

DEFINITION Human respiratory syncytial virus B isolate TH-CU/C4100/2013  
attachment glycoprotein gene, partial cds.

ACCESSION KY328101

VERSION KY328101

KEYWORDS .

SOURCE Human respiratory syncytial virus B

ORGANISM Human respiratory syncytial virus B

Viruses; ssRNA viruses; ssRNA negative-strand viruses;

Mononegavirales; Pneumoviridae; Orthopneumovirus.

REFERENCE 1 (bases 1 to 603)

AUTHORS Thongpan,I., Mauleekoonphairoj,J., Vichiwattana,P., Korkong,S.,  
Vongpunsawad,S. and Poovorawan,Y.

TITLE Molecular Characterization of Respiratory Syncytial Virus in  
Thailand, 2012-2015

JOURNAL Unpublished

REFERENCE 2 (bases 1 to 603)

AUTHORS Thongpan,I., Mauleekoonphairoj,J., Vichiwattana,P., Korkong,S.,  
Vongpunsawad,S. and Poovorawan,Y.

TITLE Direct Submission

JOURNAL Submitted (13-DEC-2016) Department of Pediatrics, Center of  
Excellence in Clinical Virology, Faculty of Medicine, Chulalongkorn  
University, Bangkok 10330, Thailand

COMMENT ##Assembly-Data-START##

Assembly Method :: DNASTAR-Lasergene v. 6

Sequencing Technology :: Sanger dideoxy sequencing

##Assembly-Data-END##

FEATURES Location/Qualifiers

source 1..603

/organism="Human respiratory syncytial virus B"

/mol\_type="viral cRNA"

/isolate="TH-CU/C4100/2013"

/host="Homo sapiens"

/db\_xref="taxon:208895"

/country="Thailand"

/collection\_date="01-Sep-2013"

/note="group: B"

CDS <1..603

/note="G protein"

/codon\_start=1

/product="attachment glycoprotein"

/protein\_id="APY20442"

/translation="IHTNSATISPNTKSETHHTTAQTKGRTSTPTQNNKPSTKPRPKN

PPKKDDYHFEVFNFPVPCISCGNNQLCKSICKTIPSNKPKKKPTTKPTNKPTTKTTNKR

DPKTLAKTPKKETTINPTKKPTKPTTERDTSTPQSTVLDTTTSKHTERDTSTSQSIAL

DTTTSKHHTTQQQSLYSTTPENTPNSTQTPTASEPSTSNST"

ORIGIN

1 atccacaaa actcagccac aatatacct aatacaaat cagaacaca ccatacaaca

61 gcacaaacca aaggcgaac ctctactcca acacagaaca acaagccaag cacaaaacca

121 cgtccaaaa atccacaaa aaaagatgat taccatttg aagtgtcaa cttgtgcc  
181 ttagtatat gtggcaaca tcaactctgc aaatccattt gcaaaacaat accaagcaat  
241 aaaccaaaaga aaaaaccaac taaaaaaccc acaaacaaac cacctaccaa aaccacaaac  
301 aaaagagacc ccaaaacact agccaaaaca ccgaaaaaag aaaccacat taaccaaca  
361 aaaaaaccaa ccccaagac cacagaaaga gacaccagca cccacaatc cactgtgetc  
421 gacacaacca catcaaaaca cacagaaaga gacaccagca cctcacaatc cattgcgctt  
481 gacacaacca catcaaaaca cacaaccaa cagcaatctc tctactcaac ccccccgaa  
541 aacacacca actccacaca aacaccaca gcatccgagc cctccacatc aaattctacc  
601 taa

//

LOCUS KY328102 585 bp cRNA linear VRL 13-DEC-2016

DEFINITION Human respiratory syncytial virus B isolate TH-CU407/2012  
attachment glycoprotein gene, partial cds.

ACCESSION KY328102

VERSION KY328102

KEYWORDS .

SOURCE Human respiratory syncytial virus B

ORGANISM Human respiratory syncytial virus B

Viruses; ssRNA viruses; ssRNA negative-strand viruses;  
Mononegavirales; Pneumoviridae; Orthopneumovirus.

REFERENCE 1 (bases 1 to 585)

AUTHORS Thongpan,I., Mauleekoonphairoj,J., Vichiwattana,P., Korkong,S.,  
Vongpunsawad,S. and Poovorawan,Y.

TITLE Molecular Characterization of Respiratory Syncytial Virus in  
Thailand, 2012-2015

JOURNAL Unpublished

REFERENCE 2 (bases 1 to 585)

AUTHORS Thongpan,I., Mauleekoonphairoj,J., Vichiwattana,P., Korkong,S.,  
Vongpunsawad,S. and Poovorawan,Y.

TITLE Direct Submission

JOURNAL Submitted (13-DEC-2016) Department of Pediatrics, Center of  
Excellence in Clinical Virology, Faculty of Medicine, Chulalongkorn  
University, Bangkok 10330, Thailand

COMMENT ##Assembly-Data-START##

Assembly Method :: DNASTAR-Lasergene v. 6  
Sequencing Technology :: Sanger dideoxy sequencing  
##Assembly-Data-END##

FEATURES Location/Qualifiers

source 1..585

/organism="Human respiratory syncytial virus B"

/mol\_type="viral cRNA"

/isolate="TH-CU407/2012"

/host="Homo sapiens"

/db\_xref="taxon:208895"

/country="Thailand"

/collection\_date="01-Aug-2012"

/note="group: B"

CDS <1..585

/note="G protein"

/codon\_start=1

/product="attachment glycoprotein"

/protein\_id="APY20443"

/translation="TISPNTKSETHHTTAQTKGRTSTPTQNNKPSTKPRPKNPPKKDD

YHFEVFNFPVPCICGNNQLCKSICKTIPSNKPKKPTTKPTNKPTKTTNKRDPKTLA

KTPKKETTINPTKKPTKPTTTERDTSTPQSTVLDTTTSKHTERDTSTSQSIALDTTTTSK  
HTTQQQLYSTTPENTPNSTQTPTASEPSTSNSST"

ORIGIN

1 acaatatcac ctaatacaaa atcagaaaca caccatacaa cagcacaac caaaggcaga  
61 accttactc caacacagaa caacaagcca agcacaacac cactgcaaa aaatccacca  
121 aaaaaagatg attaccattt tgaagtgtc aactttgtc cctgtagtat atgtggcaac  
181 aatcaactct gcaaatccat ttgcaaaaca ataccaagca ataaacaaa gaaaaaacca  
241 actacaaaac ccacaaacaa accacctacc aaaaccacaa acaaaagaga ccccaaaaca  
301 ctagccaaaa caccgaaaa agaaaccacc attaaccacaa caaaaaaac aacccccag  
361 accacagaaa gagacaccag caccccacaa tccactgtgc tcgacacaac cacatcaaaa  
421 cacacagaaa gagacaccag cacctcaaa tccattgcgc tgacacaaac cacatcaaaa  
481 cacacaacce aacagcaatc tcttactca accacccccg aaaacacacc caactccaca  
541 caaacacca cagcatcga gccctccaca tcaaattcta cctaa

//

LOCUS KY328103 603 bp cRNA linear VRL 13-DEC-2016

DEFINITION Human respiratory syncytial virus B isolate TH-CU427/2012  
attachment glycoprotein gene, partial cds.

ACCESSION KY328103

VERSION KY328103

KEYWORDS .

SOURCE Human respiratory syncytial virus B

ORGANISM Human respiratory syncytial virus B

Viruses; ssRNA viruses; ssRNA negative-strand viruses;  
Mononegavirales; Pneumoviridae; Orthopneumovirus.

REFERENCE 1 (bases 1 to 603)

AUTHORS Thongpan,I., Mauleekoonphairoj,J., Vichiwattana,P., Korkong,S.,  
Vongpunsawad,S. and Poovorawan,Y.

TITLE Molecular Characterization of Respiratory Syncytial Virus in  
Thailand, 2012-2015

JOURNAL Unpublished

REFERENCE 2 (bases 1 to 603)

AUTHORS Thongpan,I., Mauleekoonphairoj,J., Vichiwattana,P., Korkong,S.,  
Vongpunsawad,S. and Poovorawan,Y.

TITLE Direct Submission

JOURNAL Submitted (13-DEC-2016) Department of Pediatrics, Center of  
Excellence in Clinical Virology, Faculty of Medicine, Chulalongkorn  
University, Bangkok 10330, Thailand

COMMENT ##Assembly-Data-START##

Assembly Method :: DNASTAR-Lasergene v. 6  
Sequencing Technology :: Sanger dideoxy sequencing  
##Assembly-Data-END##

FEATURES Location/Qualifiers

source 1..603  
/organism="Human respiratory syncytial virus B"  
/mol\_type="viral cRNA"  
/isolate="TH-CU427/2012"  
/host="Homo sapiens"  
/db\_xref="taxon:208895"  
/country="Thailand"  
/collection\_date="01-Aug-2012"  
/note="group: B"  
CDS <1..603  
/note="G protein"  
/codon\_start=1

/product="attachment glycoprotein"  
/protein\_id="APY20444"  
/translation="IHTNSATISPNTKSETHHTTAQTKGRTSTPTQNNKPSTKPRPKN  
PPKKDDYHFEVFNFPVPCISCGNNQLCKSICKTIPSNKPKKKPTTKPTNKPPTKTTNKR  
DPKTLAKTPKKETTINPTKKPTKTERDTSTPQSTVLDTTTSKHTERDTSTSQSIAL  
DTTTSKHTTQQQSLYSTTPENTPNSTQTPTASEPSTSNST"

ORIGIN

1 atccacaaa actcagccac aatatcacct aatacaaaat cagaaacaca ccatacaaca  
61 gcacaaacca aaggcagaac ctctactcca acacagaaca acaagccaag cacaaaacca  
121 cgtccaaaaa atccacaaa aaaagatgat taccatttg aagtgtcaa cttgttccc  
181 ttagtatat gtggcaaca tcaactctgc aatccattt gaaaaacaat accaagcaat  
241 aaaccaaaaga aaaaaccaac taaaaaaccc acaaacaaac cacctaccaa aaccacaaac  
301 aaaagagacc caaaacact agccaaaaca ccgaaaaaag aaaccacat taaccaaca  
361 aaaaaaccaa ccccaagac cacagaaaga gacaccagca cccacaatc cactgtgctc  
421 gacacaacca catcaaaaca cacagaaaga gacaccagca ctcacaatc cattgctt  
481 gacacaacca catcaaaaca cacaaccaa cagcaatctc ttactcaac cacccccgaa  
541 aacacacca actccacaca aacaccaca gcatccgagc cctccacatc aaattctacc  
601 taa

//

LOCUS KY328104 603 bp cRNA linear VRL 13-DEC-2016

DEFINITION Human respiratory syncytial virus B isolate TH-CU483/2012  
attachment glycoprotein gene, partial cds.

ACCESSION KY328104

VERSION KY328104

KEYWORDS .

SOURCE Human respiratory syncytial virus B

ORGANISM Human respiratory syncytial virus B

Viruses; ssRNA viruses; ssRNA negative-strand viruses;  
Mononegavirales; Pneumoviridae; Orthopneumovirus.

REFERENCE 1 (bases 1 to 603)

AUTHORS Thongpan,I., Mauleekoonphairoj,J., Vichiwattana,P., Korkong,S.,  
Vongpunsawad,S. and Poovorawan,Y.

TITLE Molecular Characterization of Respiratory Syncytial Virus in  
Thailand, 2012-2015

JOURNAL Unpublished

REFERENCE 2 (bases 1 to 603)

AUTHORS Thongpan,I., Mauleekoonphairoj,J., Vichiwattana,P., Korkong,S.,  
Vongpunsawad,S. and Poovorawan,Y.

TITLE Direct Submission

JOURNAL Submitted (13-DEC-2016) Department of Pediatrics, Center of  
Excellence in Clinical Virology, Faculty of Medicine, Chulalongkorn  
University, Bangkok 10330, Thailand

COMMENT ##Assembly-Data-START##

Assembly Method :: DNASTAR-Lasergene v. 6  
Sequencing Technology :: Sanger dideoxy sequencing  
##Assembly-Data-END##

FEATURES Location/Qualifiers

source 1..603

/organism="Human respiratory syncytial virus B"

/mol\_type="viral cRNA"

/isolate="TH-CU483/2012"

/host="Homo sapiens"

/db\_xref="taxon:208895"

/country="Thailand"

/collection\_date="01-Oct-2012"  
/note="group: B"  
CDS <1..603  
/note="G protein"  
/codon\_start=1  
/product="attachment glycoprotein"  
/protein\_id="APY20445"  
/translation="IHTNSATISPNTKSETHHTTAQTKGRTSTPTQNNKPSTKPRPKN  
PPKKDDYHFEVFNFPVCSICGNNQLCKSICKTIPSNPKPKKPTTKPTNKPPTKTTNKR  
DPKTLAKTPKKETTINPTKKPTKPTTERDTSTPQSTVLDTTTSKHTERDTSTSQSIAL  
DTTTSKHTTQQQLSYSTTPENTPNSTQTPTASEPSTSNST"

ORIGIN

1 atccacacaa actcagccac aatatacct aatacaaat cagaacacaca ccatacaaca  
61 gcacaaacca aaggcagaac ctctactcca acacagaaca acaagccaag cacaaaacca  
121 cgtccaaaaa atccacaaa aaaagatgat taccatttg aagtgtcaa ctttgtccc  
181 tgtagtatat gtggcaacaa tcaactctgc aaatccattt gcaaaacaat accaagcaat  
241 aaaccaaga aaaaaccaac taaaaaccc acaaacaaac cacctaccaa aaccacaaac  
301 aaaagagacc caaaacact agccaaaaca ccgaaaaaag aaaccacat taaccaaca  
361 aaaaaaccaa cccaagac cacagaaaga gacaccagca cccacaatc cactgtgctc  
421 gacacaacca catcaaaaca cacagaaaga gacaccagca cctacaatc tattgcgctt  
481 gacacaacca catcaaaaca cacaaccaa cagcaatctc ttactcaac cacccccgaa  
541 aacacacca actccacaca aacaccaca gcatccgagc cctccacatc aaattctacc  
601 taa

//

LOCUS KY328105 603 bp cRNA linear VRL 13-DEC-2016

DEFINITION Human respiratory syncytial virus B isolate TH-CU464/2012  
attachment glycoprotein gene, partial cds.

ACCESSION KY328105

VERSION KY328105

KEYWORDS .

SOURCE Human respiratory syncytial virus B

ORGANISM Human respiratory syncytial virus B

Viruses; ssRNA viruses; ssRNA negative-strand viruses;  
Mononegavirales; Pneumoviridae; Orthopneumovirus.

REFERENCE 1 (bases 1 to 603)

AUTHORS Thongpan,I., Mauleekoonphairoj,J., Vichiwattana,P., Korkong,S.,  
Vongpunsawad,S. and Poovorawan,Y.

TITLE Molecular Characterization of Respiratory Syncytial Virus in  
Thailand, 2012-2015

JOURNAL Unpublished

REFERENCE 2 (bases 1 to 603)

AUTHORS Thongpan,I., Mauleekoonphairoj,J., Vichiwattana,P., Korkong,S.,  
Vongpunsawad,S. and Poovorawan,Y.

TITLE Direct Submission

JOURNAL Submitted (13-DEC-2016) Department of Pediatrics, Center of  
Excellence in Clinical Virology, Faculty of Medicine, Chulalongkorn  
University, Bangkok 10330, Thailand

COMMENT ##Assembly-Data-START##

Assembly Method :: DNASTAR-Lasergene v. 6  
Sequencing Technology :: Sanger dideoxy sequencing  
##Assembly-Data-END##

FEATURES Location/Qualifiers

source 1..603

/organism="Human respiratory syncytial virus B"

/mol\_type="viral cRNA"  
/isolate="TH-CU464/2012"  
/host="Homo sapiens"  
/db\_xref="taxon:208895"  
/country="Thailand"  
/collection\_date="01-Sep-2012"  
/note="group: B"

CDS <1..603  
/note="G protein"  
/codon\_start=1  
/product="attachment glycoprotein"  
/protein\_id="APY20446"  
/translation="IHTNSATISPNTKSETHHTTAQTKGRTSTPTQNNKPSTKPRPKN  
PPKKDDYHFEVFNFPVCSICGNNQLCKSICKTIPSNKPKKKPTTKPTNKPTKTTNKR  
DPKTLAKTPKKETTINPTKKPTKTTERTDSTPQSTVLDTTTTSKHTERDTSTSQSIAL  
DTTTSKHTTQQQSLYSTTPENTPNSTQTPTASEPSTSNSST"

#### ORIGIN

1 atccacaaa actcagccac aatatcacct aatacaaaat cagaacaca ccatacaaca  
61 gcacaaacca aaggcagaac ctctactcca acacagaaca acaagccaag cacaaaacca  
121 cgtcAAAAAA atccacaaa aaaagatgat taccatttg aagtggtcaa cttgtgcc  
181 tgtagtatat gtggcaacaa tcaactctgc aaatccattt gcaaaacaat accaagcaat  
241 aaaccaaga aaaaccaac taaaaaccc acaacaac cacctacaa aaccacaaac  
301 aaaagagacc caaaacact agccaaaaca cgaAAAAAG aaaccacat taaccaaca  
361 aaaaaacaa ccccaagac cacagaaaga gacaccagca cccacaate cactgtgctc  
421 gacacaacca catcaaaaca cacagaaaga gacaccagca ctcacaate tattgegett  
481 gacacaacca catcaaaaca cacaaccaa cagcaatctc ttactcaac cacccccgaa  
541 aacacacca actccacaca aacaccaca geatccgagc cctccacac aaattctacc  
601 taa

//  
LOCUS KY328106 600 bp cRNA linear VRL 13-DEC-2016

DEFINITION Human respiratory syncytial virus B isolate TH-CU474/2012  
attachment glycoprotein gene, partial cds.

ACCESSION KY328106

VERSION KY328106

KEYWORDS .

SOURCE Human respiratory syncytial virus B

ORGANISM Human respiratory syncytial virus B

Viruses; ssRNA viruses; ssRNA negative-strand viruses;  
Mononegavirales; Pneumoviridae; Orthopneumovirus.

REFERENCE 1 (bases 1 to 600)

AUTHORS Thongpan,I., Mauleekoonphairoj,J., Vichiwattana,P., Korkong,S.,  
Vongpunsawad,S. and Poovorawan,Y.

TITLE Molecular Characterization of Respiratory Syncytial Virus in  
Thailand, 2012-2015

JOURNAL Unpublished

REFERENCE 2 (bases 1 to 600)

AUTHORS Thongpan,I., Mauleekoonphairoj,J., Vichiwattana,P., Korkong,S.,  
Vongpunsawad,S. and Poovorawan,Y.

TITLE Direct Submission

JOURNAL Submitted (13-DEC-2016) Department of Pediatrics, Center of  
Excellence in Clinical Virology, Faculty of Medicine, Chulalongkorn  
University, Bangkok 10330, Thailand

COMMENT ##Assembly-Data-START##

Assembly Method :: DNASTAR-Lasergene v. 6



Sequencing Technology :: Sanger dideoxy sequencing

##Assembly-Data-END##

FEATURES

Location/Qualifiers

source

1..600

/organism="Human respiratory syncytial virus B"

/mol\_type="viral cRNA"

/isolate="TH-CU474/2012"

/host="Homo sapiens"

/db\_xref="taxon:208895"

/country="Thailand"

/collection\_date="01-Oct-2012"

/note="group: B"

CDS

<1..600

/note="G protein"

/codon\_start=1

/product="attachment glycoprotein"

/protein\_id="APY20447"

/translation="HTNSATISPNTKSETHHTTAQTKGRTSTPTQNNKPSTKPRPKNP

PKKDDYHFEVFNFPVPCISGNNQLCKSICKTIPSNPKKKPTTKPTNKPTTKTTNKRD

PKTLAKTPKKETTINPTKKPTPKTTERDTSTPQSTVLDTTTTSKHTERDTSTSQSIALD

TTTTSKHTTQQQSLYSTTPENTPNSTQTPTASEPSTSNST"

ORIGIN

1 cacacaaact cagccacaat atcacctaat acaaaatcag aaacacacca tacaacagca

61 caaaccaaag gcagaacctc tactccaaca cagaacaaca agccaagcac aaaaccacgt

121 ccaaaaaaat caccaaaaaa agatgattac catttgaag tgttcaactt tgttcctgt

181 agtatatgtg gcaacaatca actctgcaa tccatttgca aaacaatacc aagcaataaa

241 ccaaagaaaa aaccaactac aaaaccaca acaaaccac ctaccaaacc cacaaacaaa

301 agagacccca aacactagc caaaacaccg aaaaaagaaa ccaccattaa cccaacaaaa

361 aaaccaaccc ccaagaccac agaaagagac accagcacc cacaatccac tgtgctcgac

421 acaaccacat caaaacacac agaaagagac accagcacc cacaatccat tgcgcttgac

481 acaaccacat caaaacacac aaccaacag caatctctct actcaaccac ccccgaaaac

541 acaccaact ccacacaaac accacagca tccgagccct ccaatcaaaa tccacctaa

//

LOCUS KY328107 603 bp cRNA linear VRL 13-DEC-2016

DEFINITION Human respiratory syncytial virus B isolate TH-CU/C4157/2013  
attachment glycoprotein gene, partial cds.

ACCESSION KY328107

VERSION KY328107

KEYWORDS .

SOURCE Human respiratory syncytial virus B

ORGANISM Human respiratory syncytial virus B

Viruses; ssRNA viruses; ssRNA negative-strand viruses;

Mononegavirales; Pneumoviridae; Orthopneumovirus.

REFERENCE 1 (bases 1 to 603)

AUTHORS Thongpan,I., Mauleekoonphairoj,J., Vichiwattana,P., Korkong,S.,  
Vongpunsawad,S. and Poovorawan,Y.

TITLE Molecular Characterization of Respiratory Syncytial Virus in  
Thailand, 2012-2015

JOURNAL Unpublished

REFERENCE 2 (bases 1 to 603)

AUTHORS Thongpan,I., Mauleekoonphairoj,J., Vichiwattana,P., Korkong,S.,  
Vongpunsawad,S. and Poovorawan,Y.

TITLE Direct Submission

JOURNAL Submitted (13-DEC-2016) Department of Pediatrics, Center of

Excellence in Clinical Virology, Faculty of Medicine, Chulalongkorn University, Bangkok 10330, Thailand

COMMENT ##Assembly-Data-START##

Assembly Method :: DNASTAR-Lasergene v. 6  
Sequencing Technology :: Sanger dideoxy sequencing  
##Assembly-Data-END##

FEATURES Location/Qualifiers

source 1..603  
/organism="Human respiratory syncytial virus B"  
/mol\_type="viral cRNA"  
/isolate="TH-CU/C4157/2013"  
/host="Homo sapiens"  
/db\_xref="taxon:208895"  
/country="Thailand"  
/collection\_date="01-Oct-2013"  
/note="group: B"

CDS <1..603  
/note="G protein"  
/codon\_start=1  
/product="attachment glycoprotein"  
/protein\_id="APY20448"  
/translation="IHTNSATISPNTKSETHHTTAQTKGRTSTPTQNNKPSTKPRPKN  
PPKKDDYHFEVFNFVPCSIGNNQLCKSICKTIPSNKPKKKPTTKPTNKPPTKTTNKR  
DPKTLAKTPKKETTINPTKKPTKTTTERDTSTPQSTVLDTTTTSKHTERDTSTSQSIAL  
DTTTSKHTTQQQLYSTTPENTPNSTQTPTASEPSTSNST"

ORIGIN

1 atccacacaa actcagccac aatatacct aatacaaat cagaaacaca ccatacaaca  
61 gcacaaacca aaggcagaac ctactcca acacagaaca acaagccaag cacaaaacca  
121 cgtccaaaaa atccacaaa aaaagatgat taccatttg aagtgtcaa ctctgtccc  
181 ttagtatat gtggcaaca tcaactctgc aatccattt gcaaaacaat accaagcaat  
241 aaaccaaaaga aaaaaccaac cacaaaacc acaaaacaac cacctacca aaccacaaac  
301 aaaagagacc ccaaaacact agccaaaaca ccgaaaaaag aaaccacat taaccaaca  
361 aaaaaaccaa ccccaagac cacagaaaga gacaccagca cccacaate cactgtgctc  
421 gacacaacca catcaaaaca cacagaaaga gacaccagca ctcacaate cattgcgctt  
481 gacacaacca catcaaaaca cacaaacca cagcaatctc tctactcaac cacccccgaa  
541 aacacacca actccacaca aacaccaca gcatccgagc cctccacate aaattccacc  
601 taa

//

LOCUS KY328108 603 bp cRNA linear VRL 13-DEC-2016

DEFINITION Human respiratory syncytial virus B isolate TH-CU/CB105/2013  
attachment glycoprotein gene, partial cds.

ACCESSION KY328108

VERSION KY328108

KEYWORDS .

SOURCE Human respiratory syncytial virus B

ORGANISM Human respiratory syncytial virus B

Viruses; ssRNA viruses; ssRNA negative-strand viruses;  
Mononegavirales; Pneumoviridae; Orthopneumovirus.

REFERENCE 1 (bases 1 to 603)

AUTHORS Thongpan,I., Mauleekoonphairoj,J., Vichiwattana,P., Korkong,S.,  
Vongpunawad,S. and Poovorawan,Y.

TITLE Molecular Characterization of Respiratory Syncytial Virus in  
Thailand, 2012-2015

JOURNAL Unpublished

REFERENCE 2 (bases 1 to 603)

AUTHORS Thongpan,I., Mauleekoonphairoj,J., Vichiwattana,P., Korkong,S.,  
Vongpunsawad,S. and Poovorawan,Y.

TITLE Direct Submission

JOURNAL Submitted (13-DEC-2016) Department of Pediatrics, Center of  
Excellence in Clinical Virology, Faculty of Medicine, Chulalongkorn  
University, Bangkok 10330, Thailand

COMMENT ##Assembly-Data-START##

Assembly Method :: DNASTAR-Lasergene v. 6  
Sequencing Technology :: Sanger dideoxy sequencing  
##Assembly-Data-END##

FEATURES Location/Qualifiers

source 1..603

/organism="Human respiratory syncytial virus B"  
/mol\_type="viral cRNA"  
/isolate="TH-CU/CB105/2013"  
/host="Homo sapiens"  
/db\_xref="taxon:208895"  
/country="Thailand"  
/collection\_date="01-Oct-2013"  
/note="group: B"

CDS <1..603

/note="G protein"  
/codon\_start=1  
/product="attachment glycoprotein"  
/protein\_id="APY20449"  
/translation="IHTNSATISPNTKSETHHTTAQTKGRTFTPTQNNKPSTKPRPKN  
PPKKDDYHFEVFNFPVPCISCGNNQLCKSICKTIPSNKPKKPTTKPTNKPPTKTTNKR  
DPKTLAKTPKKETTINPTKKPTPKTTERDSTSTPQSTVLDTTTSKHTERDSTSQSIAL  
DTTTSKHTTQQQSLYSTTPENTPNSTQTPTASEPSTSNST"

ORIGIN

1 atccacacaa actcagccac aatatcacct aatacaaaat cagaaacaca ccatacaaca  
61 gcacaaacca aaggcagaac ctttactcca acacagaaca acaagccaag cacaaaacca  
121 cgtccaaaaa atccacaaa aaaagatgat taccatttg aagtgtcaa ctctgtccc  
181 ttagtatat gtggcaacaa tcaactctgc aatccattt gaaaacaat accaagcaat  
241 aaaccaaaaga aaaaaccaac cacaaaacce acaaacaaac cacctaccaa aaccacaaac  
301 aaaagagacc caaaacact agccaaaaca ccgaaaaaag aaaccacat taaccaaca  
361 aaaaaaccaa ccccaagac cacagaaaga gacaccagca cccacaatc cactgtgctc  
421 gacacaacca catcaaaaca cacagaaaga gacaccagca ctcacaatc cattgcgctt  
481 gacacaacca catcaaaaca cacaacccea cagcaatctc ttactcaac cacccccgaa  
541 aacacacca actccacaca aacaccaca geatccgagc ctccacatc aaatccacc  
601 taa

//

LOCUS KY328109 603 bp cRNA linear VRL 13-DEC-2016

DEFINITION Human respiratory syncytial virus B isolate TH-CU/CB125/2013  
attachment glycoprotein gene, partial cds.

ACCESSION KY328109

VERSION KY328109

KEYWORDS .

SOURCE Human respiratory syncytial virus B

ORGANISM Human respiratory syncytial virus B  
Viruses; ssRNA viruses; ssRNA negative-strand viruses;  
Mononegavirales; Pneumoviridae; Orthopneumovirus.

REFERENCE 1 (bases 1 to 603)

AUTHORS Thongpan,I., Mauleekoonphairoj,J., Vichiwattana,P., Korkong,S.,  
Vongpunsawad,S. and Poovorawan,Y.

TITLE Molecular Characterization of Respiratory Syncytial Virus in  
Thailand, 2012-2015

JOURNAL Unpublished

REFERENCE 2 (bases 1 to 603)

AUTHORS Thongpan,I., Mauleekoonphairoj,J., Vichiwattana,P., Korkong,S.,  
Vongpunsawad,S. and Poovorawan,Y.

TITLE Direct Submission

JOURNAL Submitted (13-DEC-2016) Department of Pediatrics, Center of  
Excellence in Clinical Virology, Faculty of Medicine, Chulalongkorn  
University, Bangkok 10330, Thailand

COMMENT ##Assembly-Data-START##

Assembly Method :: DNASTAR-Lasergene v. 6  
Sequencing Technology :: Sanger dideoxy sequencing  
##Assembly-Data-END##

FEATURES Location/Qualifiers

source 1..603  
/organism="Human respiratory syncytial virus B"  
/mol\_type="viral cRNA"  
/isolate="TH-CU/CB125/2013"  
/host="Homo sapiens"  
/db\_xref="taxon:208895"  
/country="Thailand"  
/collection\_date="01-Nov-2013"  
/note="group: B"

CDS <1..603  
/note="G protein"  
/codon\_start=1  
/product="attachment glycoprotein"  
/protein\_id="APY20450"  
/translation="IHTNSATISPNTKSETHHTTAQTKGRTSTPTQNNKPSTKPRPKN  
PPKKDDYHFEVFNFPVPCISICGNNQLCKSICKTIPSNKPKKKPTTKPTNKPPTKTTNKR  
DPKTLAKTPKKETTINPTKKPTKPTTERDTSTPQSTVLDTTTSKHTERDTSTSQSTAL  
DTTTSKHTTQQQLHSTTPENTPNSTQTPTASEPSTSNST"

ORIGIN

1 atccacacaa actcagccac aatatacct aatacaaat cagaacaca ccatacaaca  
61 gcacaaacca aaggcagaac ctctactcca acacagaaca acaagccaag cacaaaacca  
121 cgtccaaaaa atccacaaa aaaagatgat taccatttg aagtgtcaa cttegttccc  
181 tgtagtatat gtggcaacaa tcaactctgc aaatccattt gcaaaacaat accaagcaat  
241 aaaccaaaga aaaaaccaac taaaaaacc acaaaaaac cacctacaa aaccacaaac  
301 aaaagagacc caaaacact agccaaaaca ccgaaaaaag aaaccacat taaccaaca  
361 aaaaaacaa ccccaagac cacagaaaga gacaccagea cccacaate cactgtgetc  
421 gacacaacca catcaaaaca cacagaaaga gacaccagea cctacaate cactgctt  
481 gacacaacca catcaaaaca cacaaccaa gagcaatctc tcaactcaac cacccccgaa  
541 aacacacca actccacaca aacaccaca gcatccgagc cctccacatc aaattccacc  
601 taa

//

LOCUS KY328110 603 bp cRNA linear VRL 13-DEC-2016

DEFINITION Human respiratory syncytial virus B isolate TH-CU/CB112/2013  
attachment glycoprotein gene, partial cds.

ACCESSION KY328110

VERSION KY328110

KEYWORDS .

SOURCE Human respiratory syncytial virus B  
 ORGANISM Human respiratory syncytial virus B  
 Viruses; ssRNA viruses; ssRNA negative-strand viruses;  
 Mononegavirales; Pneumoviridae; Orthopneumovirus.

REFERENCE 1 (bases 1 to 603)  
 AUTHORS Thongpan,I., Mauleekoonphairoj,J., Vichiwattana,P., Korkong,S.,  
 Vongpunsawad,S. and Poovorawan,Y.  
 TITLE Molecular Characterization of Respiratory Syncytial Virus in  
 Thailand, 2012-2015  
 JOURNAL Unpublished

REFERENCE 2 (bases 1 to 603)  
 AUTHORS Thongpan,I., Mauleekoonphairoj,J., Vichiwattana,P., Korkong,S.,  
 Vongpunsawad,S. and Poovorawan,Y.  
 TITLE Direct Submission  
 JOURNAL Submitted (13-DEC-2016) Department of Pediatrics, Center of  
 Excellence in Clinical Virology, Faculty of Medicine, Chulalongkorn  
 University, Bangkok 10330, Thailand

COMMENT ##Assembly-Data-START##  
 Assembly Method :: DNASTAR-Lasergene v. 6  
 Sequencing Technology :: Sanger dideoxy sequencing  
 ##Assembly-Data-END##

FEATURES Location/Qualifiers  
 source 1..603  
 /organism="Human respiratory syncytial virus B"  
 /mol\_type="viral cRNA"  
 /isolate="TH-CU/CB112/2013"  
 /host="Homo sapiens"  
 /db\_xref="taxon:208895"  
 /country="Thailand"  
 /collection\_date="01-Nov-2013"  
 /note="group: B"

CDS <1..603  
 /note="G protein"  
 /codon\_start=1  
 /product="attachment glycoprotein"  
 /protein\_id="APY20451"  
 /translation="IYTNSATISPNTKSETHHTTAQTKGRTSTPTQNNKPSTKPRPKN  
 PPKKDDYHFEVFNFPVPCISGNNQLCKSICKTIPSNKPKKKPTTKPTNKPPTKTTNKR  
 DPKTLAKTPKKETTINPTKKPTPKTTERDSTSTPQSTVLDTTTTSKHTERDSTSTQSTAL  
 DTTTSKHTTQQQLHSTTPENTPNSTQTPTASEPSTSNST"

ORIGIN  
 1 atctacaaa actcagccac aatatcacct aatacaaaat cagaaacaca ccatacaaca  
 61 gcacaaacca aaggcagaac ctctactcca acacagaaca acaagccaag cacaaaacca  
 121 cgtccaaaaa atccacaaa aaaagatgat taccatttg aagtggtcaa ctctgttccc  
 181 tgtagtatat gtggcaacaa tcaactctgc aaatccattt gcaaaacaat accaagcaat  
 241 aaaccaaaga aaaaaccaac tacaaaaccc acaaacaaac cacctaccaa aaccacaaac  
 301 aaaagagacc ccaaaacact agccaaaaca cggaaaaaag aaaccacat taaccaaca  
 361 aaaaaaccaa ccccaagac cacagaaaga gacaccagca cccacaate cactgtgctc  
 421 gacacaacca catcaaaaca cacagaaaga gacaccagca cctcacaate cactgcgctt  
 481 gacacaacca catcaaaaca cacaaccaa cagcaatctc tccactcaac cacccccga  
 541 aacacacca actccacaca aacaccaca geatccgagc cctccacac aaatccacc  
 601 taa

//  
 LOCUS KY328111 597 bp cRNA linear VRL 13-DEC-2016

DEFINITION Human respiratory syncytial virus B isolate TH-CU/CB95/2013  
attachment glycoprotein gene, partial cds.

ACCESSION KY328111

VERSION KY328111

KEYWORDS .

SOURCE Human respiratory syncytial virus B

ORGANISM Human respiratory syncytial virus B

Viruses; ssRNA viruses; ssRNA negative-strand viruses;  
Mononegavirales; Pneumoviridae; Orthopneumovirus.

REFERENCE 1 (bases 1 to 597)

AUTHORS Thongpan,I., Mauleekoonphairoj,J., Vichiwattana,P., Korkong,S.,  
Vongpunsawad,S. and Poovorawan,Y.

TITLE Molecular Characterization of Respiratory Syncytial Virus in  
Thailand, 2012-2015

JOURNAL Unpublished

REFERENCE 2 (bases 1 to 597)

AUTHORS Thongpan,I., Mauleekoonphairoj,J., Vichiwattana,P., Korkong,S.,  
Vongpunsawad,S. and Poovorawan,Y.

TITLE Direct Submission

JOURNAL Submitted (13-DEC-2016) Department of Pediatrics, Center of  
Excellence in Clinical Virology, Faculty of Medicine, Chulalongkorn  
University, Bangkok 10330, Thailand

COMMENT ##Assembly-Data-START##

Assembly Method :: DNASTAR-Lasergene v. 6  
Sequencing Technology :: Sanger dideoxy sequencing  
##Assembly-Data-END##

FEATURES Location/Qualifiers

source 1..597

/organism="Human respiratory syncytial virus B"  
/mol\_type="viral cRNA"  
/isolate="TH-CU/CB95/2013"  
/host="Homo sapiens"  
/db\_xref="taxon:208895"  
/country="Thailand"  
/collection\_date="01-Sep-2013"  
/note="group: B"

CDS <1..597

/note="G protein"  
/codon\_start=1  
/product="attachment glycoprotein"  
/protein\_id="APY20452"  
/translation="TNSATISPNTKSETHHTTAQTKGRTSTPTQNNKPSTKPRPKNPP  
KKDDYHFEVFNFPVPCISCGNNQLCKSICKTIPSNKPKKPTTKPTNKPPTKTTNKRDP  
KTLAKTPKETTINPTKKPTPKTTERDSTPQSTVLDTTTSKHTERDSTSTSQSTALDT  
TTSKHTTQQQLHSTTPENTPNSTQTPTASEPSTSNST"

ORIGIN

1 acaaactcag ccacaatc acctaataca aatcagaaa cacaccatac aacagcaca  
61 accaaaggca gaacctctac tccaacacag aacaacaagc caagcacaacc accacgtcca  
121 aaaaatccac caaaaaaga tgattaccat tttgaagtgt tcaactcgt tcctgtagt  
181 atatgtggca acaatcaact ctgcaaatcc atctgcaaaa caataccaag caataacca  
241 aagaaaaaac caactacaaa acccacaaac aaaccaccta ccaaaaccac aaacaaaaga  
301 gaccccaaaa cactagecaa aacaccgaaa aaagaaacca ccattaacce aacaaaaaaa  
361 ccaacccca agaccacaga aagagacacc agcacaccac aatccactgt gctcgacaca  
421 accacatcaa aacacacaga aagagacacc agcacctcac aatccactgc gcttgacaca

481 accacatcaa aacacacaac ccaacagcaa tctctcact caaccacccc cgaaaacaca  
541 cccaactcca cacaacacc cacagcatcc gagcctcca catcaatc cacctaa

//

LOCUS KY328112 603 bp cRNA linear VRL 13-DEC-2016  
DEFINITION Human respiratory syncytial virus B isolate TH-CU/C3173/2012  
attachment glycoprotein gene, partial cds.

ACCESSION KY328112

VERSION KY328112

KEYWORDS .

SOURCE Human respiratory syncytial virus B

ORGANISM Human respiratory syncytial virus B

Viruses; ssRNA viruses; ssRNA negative-strand viruses;  
Mononegavirales; Pneumoviridae; Orthopneumovirus.

REFERENCE 1 (bases 1 to 603)

AUTHORS Thongpan,I., Mauleekoonphairoj,J., Vichiwattana,P., Korkong,S.,  
Vongpunsawad,S. and Poovorawan,Y.

TITLE Molecular Characterization of Respiratory Syncytial Virus in  
Thailand, 2012-2015

JOURNAL Unpublished

REFERENCE 2 (bases 1 to 603)

AUTHORS Thongpan,I., Mauleekoonphairoj,J., Vichiwattana,P., Korkong,S.,  
Vongpunsawad,S. and Poovorawan,Y.

TITLE Direct Submission

JOURNAL Submitted (13-DEC-2016) Department of Pediatrics, Center of  
Excellence in Clinical Virology, Faculty of Medicine, Chulalongkorn  
University, Bangkok 10330, Thailand

COMMENT ##Assembly-Data-START##

Assembly Method :: DNASTAR-Lasergene v. 6  
Sequencing Technology :: Sanger dideoxy sequencing  
##Assembly-Data-END##

FEATURES Location/Qualifiers

source 1..603  
/organism="Human respiratory syncytial virus B"  
/mol\_type="viral cRNA"  
/isolate="TH-CU/C3173/2012"  
/host="Homo sapiens"  
/db\_xref="taxon:208895"  
/country="Thailand"  
/collection\_date="01-Sep-2012"  
/note="group: B"

CDS <1..603  
/note="G protein"  
/codon\_start=1  
/product="attachment glycoprotein"  
/protein\_id="APY20453"  
/translation="IHTNSATISPNTKSETHHTTAQTKGRTSTPTQNNKPSTKPRPKN  
PPKKDDYHFEVFNFPVCSICGNNQLCKSICKTIPSNKPKKKPTTKPTNKPPTKTTNKR  
DPKTLAKTPKKETTINPTRKPTPKTTERDSTPQSSVLDTTTTSKHTERDTSTSQSIAL  
DTTTSKHTTQQQSLYSTTPENTPNSTQTPTASEPSTSNST"

ORIGIN

1 atccacacaa actcagccac aatatacct aatacaaat cagaacacaca ccatacaaca  
61 gcacaaacca aaggcagaac ctctactcca acacagaaca acaagccaag cacaaaacca  
121 cgtccaaaaa atccacaaa aaaagatgat taccatttg aagtgtcaa cttgtgcc  
181 tgtagtatat gtggcaacaa tcaactctgc aaatccattt gcaaaacaat accaagcaat

241 aaaccaaga aaaaaccaac tacaaaacc acaacaac cacctacca aaccacaac  
301 aaaagagacc caaaacact agccaaaaca ccgaaaaaag aaaccacat taaccaaca  
361 agaaaacca ccccaagac cacagaaaga gacaccagca cccacaatc ctctgtgctc  
421 gacacaacca catcaaaaca cacagaaaga gacaccagca cctcacaatc cattgcgett  
481 gacacaacca catcaaaaca cacaacca cagcaatctc tctactcaac ccccccgaa  
541 aacacacca actccacaca aacaccaca gcatccgagc cctccacatc aaattctacc  
601 taa

//

LOCUS KY328113 603 bp cRNA linear VRL 13-DEC-2016

DEFINITION Human respiratory syncytial virus B isolate TH-CU476/2013  
attachment glycoprotein gene, partial cds.

ACCESSION KY328113

VERSION KY328113

KEYWORDS .

SOURCE Human respiratory syncytial virus B

ORGANISM Human respiratory syncytial virus B

Viruses; ssRNA viruses; ssRNA negative-strand viruses;  
Mononegavirales; Pneumoviridae; Orthopneumovirus.

REFERENCE 1 (bases 1 to 603)

AUTHORS Thongpan,I., Mauleekoonphairoj,J., Vichiwattana,P., Korkong,S.,  
Vongpunsawad,S. and Poovorawan,Y.

TITLE Molecular Characterization of Respiratory Syncytial Virus in  
Thailand, 2012-2015

JOURNAL Unpublished

REFERENCE 2 (bases 1 to 603)

AUTHORS Thongpan,I., Mauleekoonphairoj,J., Vichiwattana,P., Korkong,S.,  
Vongpunsawad,S. and Poovorawan,Y.

TITLE Direct Submission

JOURNAL Submitted (13-DEC-2016) Department of Pediatrics, Center of  
Excellence in Clinical Virology, Faculty of Medicine, Chulalongkorn  
University, Bangkok 10330, Thailand

COMMENT ##Assembly-Data-START##

Assembly Method :: DNASTAR-Lasergene v. 6  
Sequencing Technology :: Sanger dideoxy sequencing  
##Assembly-Data-END##

FEATURES Location/Qualifiers

source 1..603

/organism="Human respiratory syncytial virus B"

/mol\_type="viral cRNA"

/isolate="TH-CU476/2013"

/host="Homo sapiens"

/db\_xref="taxon:208895"

/country="Thailand"

/collection\_date="01-Oct-2012"

/note="group: B"

CDS <1..603

/note="G protein"

/codon\_start=1

/product="attachment glycoprotein"

/protein\_id="APY20454"

/translation="IHTNSATISPNTKSETHHTTAQTKGRTSTPTQNNKPSTKPRPKN

PPKKDDYHFEVFNFPVCSICGNNQLCKSICKTIPSNKPKKPTTKPTNKPPTKTTNKR

DPKTLAKTPKKETTINPTKKPTPKTTERDSTPHSTVLDTTTSKHTERDSTSQSTAL

DTTTSKHTTQQQSLYSTTPENTPNSTQTPTASEPSTSNST"



## ORIGIN

1 atccacacaa actcagccac aatatcacct aatacaaaat cagaacaca ccatacaaca  
61 gcacaaacca aaggcgaac ctctactcca acacagaaca acaagccaag cacaaaacca  
121 cgtccaaaaa atccacaaa aaaagatgat taccattttg aagtggtcaa ctttggtccc  
181 tgtagtatat gtggcaacaa tcaactctgc aaatccattt gcaaaacaat accaagcaat  
241 aaaccaaaga aaaaaccaac tacaaaaccc acaaacaaac cacctaccaa aaccacaaac  
301 aaaagagacc ccaaaacact agccaaaaca cggaaaaaag aaaccacat taaccaaca  
361 aaaaaaccaa cccccaagac aacagaaaga gacaccagca cccacactc cactgtgctc  
421 gacacaacca catcaaaaca cacagaaaga gacaccagca cctcacaate cactgcgctt  
481 gacacaacca catcaaaaca cacaaccaa cagcaatctc ttactcaac cacccccgaa  
541 aacacacca actccacaca aacaccaca geatccgagc cctccacate aaatccacc  
601 taa

//

LOCUS KY328114 603 bp cRNA linear VRL 13-DEC-2016  
DEFINITION Human respiratory syncytial virus B isolate TH-CU/CB126/2013  
attachment glycoprotein gene, partial cds.

ACCESSION KY328114

VERSION KY328114

KEYWORDS .

SOURCE Human respiratory syncytial virus B

ORGANISM Human respiratory syncytial virus B

Viruses; ssRNA viruses; ssRNA negative-strand viruses;  
Mononegavirales; Pneumoviridae; Orthopneumovirus.

REFERENCE 1 (bases 1 to 603)

AUTHORS Thongpan,I., Mauleekoonphairoj,J., Vichiwattana,P., Korkong,S.,  
Vongpunsawad,S. and Poovorawan,Y.

TITLE Molecular Characterization of Respiratory Syncytial Virus in  
Thailand, 2012-2015

JOURNAL Unpublished

REFERENCE 2 (bases 1 to 603)

AUTHORS Thongpan,I., Mauleekoonphairoj,J., Vichiwattana,P., Korkong,S.,  
Vongpunsawad,S. and Poovorawan,Y.

TITLE Direct Submission

JOURNAL Submitted (13-DEC-2016) Department of Pediatrics, Center of  
Excellence in Clinical Virology, Faculty of Medicine, Chulalongkorn  
University, Bangkok 10330, Thailand

COMMENT ##Assembly-Data-START##

Assembly Method :: DNASTAR-Lasergene v. 6  
Sequencing Technology :: Sanger dideoxy sequencing  
##Assembly-Data-END##

FEATURES Location/Qualifiers

source 1..603  
/organism="Human respiratory syncytial virus B"  
/mol\_type="viral cRNA"  
/isolate="TH-CU/CB126/2013"  
/host="Homo sapiens"  
/db\_xref="taxon:208895"  
/country="Thailand"  
/collection\_date="01-Nov-2013"  
/note="group: B"

CDS <1..603  
/note="G protein"  
/codon\_start=1  
/product="attachment glycoprotein"

```
/protein_id="APY20455"  
/translation="IHTNSATISPNTKSETHHTTAQTKGRTSTPTQNNKPSTKPRPKN  
PPKKDDYHFEVFNFVPCISCGNNQLCKSICKTIPSNKPKKKPTTKPTNKPPTKTTNKS  
DPKTLAKTPKKETTINPTKKPTKTTTERDTSTPQSTVLDTTTSKHTERDTSTPQSTAL  
DTTTSKHTTQQQLHSTTPENTPNSTQTPTASEPSTSNSST"
```

ORIGIN

```
1 atccacaaa actcagccac aatatacct aatacaaat cagaaacaca ccatacaaca  
61 gcacaaacca aaggcagaac ctactacca acacagaaca acaagccaag cacaaaacca  
121 cgtccaaaaa atccacaaa aaaagatgat taccatttg aagtgtcaa ctctgtccc  
181 ttagtatat gtggcaaca tcaactctgc aatccatct gcaaaacaat accaagcaat  
241 aaaccaaaaga aaaaaccaac taaaaaaccc acaaacaaac cacctaccaa aaccacaaac  
301 aaaagtgacc caaaacact agccaaaaca cggaaaaaag aaaccacat taaccaaca  
361 aaaaaaccaa ccccaagac cacagaaga gacaccagca cccacaatc cactgtgetc  
421 gacacaacca catcaaaaca cacagaaga gacaccagca cccacaatc cactgcactt  
481 gacacaacca catcaaaaca cacaaccaa cagcaatct tccactcaac ccccccgaa  
541 aacacacca actccacaca aacaccaca gcatccgagc cctccacatc aaattccacc  
601 taa
```

//

LOCUS KY328115 603 bp cRNA linear VRL 13-DEC-2016  
DEFINITION Human respiratory syncytial virus B isolate TH-CU/B10596/2014  
attachment glycoprotein gene, partial cds.

ACCESSION KY328115

VERSION KY328115

KEYWORDS .

SOURCE Human respiratory syncytial virus B

ORGANISM Human respiratory syncytial virus B

Viruses; ssRNA viruses; ssRNA negative-strand viruses;  
Mononegavirales; Pneumoviridae; Orthopneumovirus.

REFERENCE 1 (bases 1 to 603)

AUTHORS Thongpan,I., Mauleekoonphairoj,J., Vichiwattana,P., Korkong,S.,  
Vongpunsawad,S. and Poovorawan,Y.

TITLE Molecular Characterization of Respiratory Syncytial Virus in  
Thailand, 2012-2015

JOURNAL Unpublished

REFERENCE 2 (bases 1 to 603)

AUTHORS Thongpan,I., Mauleekoonphairoj,J., Vichiwattana,P., Korkong,S.,  
Vongpunsawad,S. and Poovorawan,Y.

TITLE Direct Submission

JOURNAL Submitted (13-DEC-2016) Department of Pediatrics, Center of  
Excellence in Clinical Virology, Faculty of Medicine, Chulalongkorn  
University, Bangkok 10330, Thailand

COMMENT ##Assembly-Data-START##

Assembly Method :: DNASTAR-Lasergene v. 6  
Sequencing Technology :: Sanger dideoxy sequencing  
##Assembly-Data-END##

FEATURES Location/Qualifiers

source 1..603

/organism="Human respiratory syncytial virus B"

/mol\_type="viral cRNA"

/isolate="TH-CU/B10596/2014"

/host="Homo sapiens"

/db\_xref="taxon:208895"

/country="Thailand"

/collection\_date="01-Aug-2014"

CDS /note="group: B"  
<1..603  
/note="G protein"  
/codon\_start=1  
/product="attachment glycoprotein"  
/protein\_id="APY20456"  
/translation="IHTNLATISPNTKSETHHTTAQTKGRTSTPTQKNKPSTKPRPKN  
PPKKDDYHFEVFNFVPCISICGNNQLCKSICKTIPSNKPKKKPTTKPTNKPPTKTTNKR  
DPKTLAKTPKKETTINPTKKPTKTTTERDTSTPQSTVLDTTTTSKHTERDTSTSQSIAL  
TTTTSKHTTQQQLSYSTTPENTPNSTQTPTASEPSTSNST"

ORIGIN

1 atccacacaa acttagccac aatatacct aatacaaaat cagaaacaca ccatacaaca  
61 gcacaaacca aaggcagaac ctctactcca acacagaaga acaagccaag cacaaaacca  
121 cgtccaaaaa atccacaaa aaaagatgat taccatttg aagtgtcaa ctctgtccc  
181 tgtagtatat gtggcaacaa tcaactctgc aaatccattt gcaaaacaat accaagcaat  
241 aaaccaaaga aaaaaccaac taaaaaaccc acaaacaaac cacctaccaa aaccacaaac  
301 aaaagagacc caaaacact agccaaaaca ccgaaaaaag aaaccacat taaccaaca  
361 aaaaaaccaa ccccaagac cacagaaaga gacaccagca cccacaatc cactgtgctc  
421 gacacaacca catcaaaaca cacagaaaga gacaccagca ctcacaatc cattgcegtt  
481 gacacaacca catcaaaaca cacaaccaa cagcaatctc tctactcaac cacccccgaa  
541 aacacacca actccacaca aacaccaca geatccgagc ctccacatc aaactccacc  
601 taa

//

LOCUS KY328116 624 bp cRNA linear VRL 13-DEC-2016  
DEFINITION Human respiratory syncytial virus B isolate TH-CU/B10598/2014  
attachment glycoprotein gene, partial cds.

ACCESSION KY328116

VERSION KY328116

KEYWORDS .

SOURCE Human respiratory syncytial virus B

ORGANISM Human respiratory syncytial virus B

Viruses; ssRNA viruses; ssRNA negative-strand viruses;  
Mononegavirales; Pneumoviridae; Orthopneumovirus.

REFERENCE 1 (bases 1 to 624)

AUTHORS Thongpan,I., Mauleekoonphairoj,J., Vichiwattana,P., Korkong,S.,  
Vongpunsawad,S. and Poovorawan,Y.

TITLE Molecular Characterization of Respiratory Syncytial Virus in  
Thailand, 2012-2015

JOURNAL Unpublished

REFERENCE 2 (bases 1 to 624)

AUTHORS Thongpan,I., Mauleekoonphairoj,J., Vichiwattana,P., Korkong,S.,  
Vongpunsawad,S. and Poovorawan,Y.

TITLE Direct Submission

JOURNAL Submitted (13-DEC-2016) Department of Pediatrics, Center of  
Excellence in Clinical Virology, Faculty of Medicine, Chulalongkorn  
University, Bangkok 10330, Thailand

COMMENT ##Assembly-Data-START##

Assembly Method :: DNASTAR-Lasergene v. 6  
Sequencing Technology :: Sanger dideoxy sequencing  
##Assembly-Data-END##

FEATURES Location/Qualifiers

source 1..624

/organism="Human respiratory syncytial virus B"  
/mol\_type="viral cRNA"

/isolate="TH-CU/B10598/2014"  
/host="Homo sapiens"  
/db\_xref="taxon:208895"  
/country="Thailand"  
/collection\_date="02-Aug-2014"  
/note="group: B"

CDS

<1..624  
/note="G protein"  
/codon\_start=1  
/product="attachment glycoprotein"  
/protein\_id="APY20457"  
/translation="IHTNLATISPNTKSETHHTTAQTKGRTSTPTQKNKPSTKPRPKN  
PPKKDDYHFEVFNFPVCSICGNNQLCKSICKTIPSNKPKKKPTTKPTNKPPTKTTNKR  
DPKTLAKTPKKETTINPTKKPTPKTTERDTSTPQSTVLDTTTTSKHTERDTSTSQSIAL  
TTTTSKHTTQQQSLYSTTPENTPNSTQTPTASEPSTSNSTQKLQSYA"

ORIGIN

1 atccacaaa acttagccac aatatacct aatacaaat cagaaacaca ccatacaaca  
61 gcacaaacca aaggcagaac ctctactcca acacagaaga acaagccaag cacaaaacca  
121 cgtcAAAAAA atccacaaa aaaagatgat taccatttg aagtgtca cttcgttccc  
181 tgtagtatat gtggcaacaa tcaactctgc aaatccattt gcaaaacaat accaagcaat  
241 aaaccaaaga aaaaaccaac taaaaaccc acaaacaaac cacctaccaa aaccacaaac  
301 aaaagagacc caaaacact agccaaaaca ccgaaaaaag aaaccacat taaccaaca  
361 aaaaaacaa ccccaagac cacagaaaga gacaccagca cccacaate cactgtgctc  
421 gacacaacca catcaaaaca cacagaaaga gacaccagca ctcacaatc cattgcgett  
481 gacacaacca catcaaaaca cacaaccaa cagcaatctc ttactcaac ccccccgaa  
541 aacacacca actccacaca aacaccaca gcatccgagc cctccacatc aaatccacc  
601 caaaaactcc agtcatatgc ttag

//

LOCUS KY328117 603 bp cRNA linear VRL 13-DEC-2016  
DEFINITION Human respiratory syncytial virus B isolate TH-CU/C4051/2013  
attachment glycoprotein gene, partial cds.

ACCESSION KY328117

VERSION KY328117

KEYWORDS .

SOURCE Human respiratory syncytial virus B

ORGANISM Human respiratory syncytial virus B

Viruses; ssRNA viruses; ssRNA negative-strand viruses;  
Mononegavirales; Pneumoviridae; Orthopneumovirus.

REFERENCE 1 (bases 1 to 603)

AUTHORS Thongpan,I., Mauleekoonphairoj,J., Vichiwattana,P., Korkong,S.,  
Vongpunsawad,S. and Poovorawan,Y.

TITLE Molecular Characterization of Respiratory Syncytial Virus in  
Thailand, 2012-2015

JOURNAL Unpublished

REFERENCE 2 (bases 1 to 603)

AUTHORS Thongpan,I., Mauleekoonphairoj,J., Vichiwattana,P., Korkong,S.,  
Vongpunsawad,S. and Poovorawan,Y.

TITLE Direct Submission

JOURNAL Submitted (13-DEC-2016) Department of Pediatrics, Center of  
Excellence in Clinical Virology, Faculty of Medicine, Chulalongkorn  
University, Bangkok 10330, Thailand

COMMENT ##Assembly-Data-START##

Assembly Method :: DNASTAR-Lasergene v. 6  
Sequencing Technology :: Sanger dideoxy sequencing

##Assembly-Data-END##

FEATURES Location/Qualifiers

source 1..603  
/organism="Human respiratory syncytial virus B"  
/mol\_type="viral cRNA"  
/isolate="TH-CU/C4051/2013"  
/host="Homo sapiens"  
/db\_xref="taxon:208895"  
/country="Thailand"  
/collection\_date="01-Aug-2013"  
/note="group: B"

CDS <1..603  
/note="G protein"  
/codon\_start=1  
/product="attachment glycoprotein"  
/protein\_id="APY20458"  
/translation="IHTNSATISPNTKSETHHTTAQTKGRTSTPTQNNKPSTKPRPKN  
PPKKDDYHFEVFNFCNICGNNQLCKSICKTIPSNKPKKKPTTKPTNKPTKTTNKR  
DPKTLAKTPKKETTINPTKKPTKTTTERDTSTPQSTVLDTTTTKHTERDTSTPQSTAL  
DTTTSKHTTQQQLHSTTPENTPNSTQTPTAPEPSTSNST"

ORIGIN

1 atccacacaa actcagccac aatatacct aatacaaaat cagaacaca ccatacaaca  
61 gcacaaacca aaggcagaac ctctactcca acacagaaca acaagccaag cacaaaacca  
121 cgtccaaaaa atccacaaa aaaagatgat taccatttg aagtgtcaa ctctgtccc  
181 tgaatatat gtggcaacaa tcaactctgc aatccattt gcaaaacaat accaagcaat  
241 aaaccaaaga aaaaaccaac tacaaaaccc acaacaaaac cacctacaa aaccacaaac  
301 aaaagagacc ccaaaacact agccaaaaca ccgaaaaaag aaaccacat taaccaaca  
361 aaaaaacaa cccccaagac cacagaaaga gacaccagca cccacaate cactgtgctc  
421 gacacaacca caacaaaaca cacagaaaga gacaccagca cccacaate cactgcgctt  
481 gacacaacca catcaaaaaca cacaaccaa cagcaatctc tccactcaac caccgccgaa  
541 aacacacca actccacaca aacaccaca geaccgagc cctccacatc aatccacc  
601 taa

//

LOCUS KY328118 603 bp cRNA linear VRL 13-DEC-2016

DEFINITION Human respiratory syncytial virus B isolate TH-CU/C4066/2013  
attachment glycoprotein gene, partial cds.

ACCESSION KY328118

VERSION KY328118

KEYWORDS .

SOURCE Human respiratory syncytial virus B

ORGANISM Human respiratory syncytial virus B

Viruses; ssRNA viruses; ssRNA negative-strand viruses;  
Mononegavirales; Pneumoviridae; Orthopneumovirus.

REFERENCE 1 (bases 1 to 603)

AUTHORS Thongpan,I., Mauleekoonphairoj,J., Vichiwattana,P., Korkong,S.,  
Vongpunsawad,S. and Poovorawan,Y.

TITLE Molecular Characterization of Respiratory Syncytial Virus in  
Thailand, 2012-2015

JOURNAL Unpublished

REFERENCE 2 (bases 1 to 603)

AUTHORS Thongpan,I., Mauleekoonphairoj,J., Vichiwattana,P., Korkong,S.,  
Vongpunsawad,S. and Poovorawan,Y.

TITLE Direct Submission

JOURNAL Submitted (13-DEC-2016) Department of Pediatrics, Center of

Excellence in Clinical Virology, Faculty of Medicine, Chulalongkorn University, Bangkok 10330, Thailand

COMMENT ##Assembly-Data-START##

Assembly Method :: DNASTAR-Lasergene v. 6  
Sequencing Technology :: Sanger dideoxy sequencing  
##Assembly-Data-END##

FEATURES Location/Qualifiers

source 1..603  
/organism="Human respiratory syncytial virus B"  
/mol\_type="viral cRNA"  
/isolate="TH-CU/C4066/2013"  
/host="Homo sapiens"  
/db\_xref="taxon:208895"  
/country="Thailand"  
/collection\_date="01-Aug-2013"  
/note="group: B"

CDS <1..603  
/note="G protein"  
/codon\_start=1  
/product="attachment glycoprotein"  
/protein\_id="APY20459"  
/translation="IHTNSATISPNTKSETHHTTAQTKGRTSTPTQNNKPSTKPRPKN  
PPKKDDYHFEVFNFVPCNICGNNQLCKSICKTIPSNKPKKKPTTKPTNKPPTKTTNKR  
DPKTLAKTPKKETTINPTKKPTPKTTERDTSTPQSTVLDTTTTKHTERDTSTPQSTAL  
DTTTSKHTTQQQLHSTTPENTPNSTQTPTAPEPSTSNST"

ORIGIN

1 atccacacaa actcagccac aatatacct aatacaaat cagaaacaca ccatacaaca  
61 gcacaaacca aaggcagaac ctactcca acacagaaca acaagccaag cacaaaacca  
121 cgtccaaaaa atccacaaa aaaagatgat taccatttg aagtgtcaa ctctgtccc  
181 tgaatatat gtggcaacaa tcaactctgc aaatccattt gcaaaacaat accaagcaat  
241 aaaccaaaaga aaaaaccaac taaaaaaccc acaaacaaac cacctaccaa aaccacaaac  
301 aaaagagacc caaaacact agccaaaaca ccgaaaaaag aaaccacat taaccaaca  
361 aaaaaaccaa ccccaagac cacagaaaga gacaccagca cccacaatc cactgtgetc  
421 gacacaacca caacaaaaca cacagaaaga gacaccagca cccacaatc cactgcgctt  
481 gacacaacca catcaaaaaca cacaaccaa cagcaatctc tccactcaac ccccccgaa  
541 aacacacca actccacaca aacaccaca gaccccgagc ctccacatc aaattccacc  
601 taa

//

LOCUS KY328119 603 bp cRNA linear VRL 13-DEC-2016

DEFINITION Human respiratory syncytial virus B isolate TH-CU/C4065/2013  
attachment glycoprotein gene, partial cds.

ACCESSION KY328119

VERSION KY328119

KEYWORDS .

SOURCE Human respiratory syncytial virus B

ORGANISM Human respiratory syncytial virus B

Viruses; ssRNA viruses; ssRNA negative-strand viruses;  
Mononegavirales; Pneumoviridae; Orthopneumovirus.

REFERENCE 1 (bases 1 to 603)

AUTHORS Thongpan,I., Mauleekoonphairoj,J., Vichiwattana,P., Korkong,S.,  
Vongpunswad,S. and Poovorawan,Y.

TITLE Molecular Characterization of Respiratory Syncytial Virus in  
Thailand, 2012-2015

JOURNAL Unpublished

REFERENCE 2 (bases 1 to 603)

AUTHORS Thongpan,I., Mauleekoonphairoj,J., Vichiwattana,P., Korkong,S.,  
Vongpunsawad,S. and Poovorawan,Y.

TITLE Direct Submission

JOURNAL Submitted (13-DEC-2016) Department of Pediatrics, Center of  
Excellence in Clinical Virology, Faculty of Medicine, Chulalongkorn  
University, Bangkok 10330, Thailand

COMMENT ##Assembly-Data-START##

Assembly Method :: DNASTAR-Lasergene v. 6  
Sequencing Technology :: Sanger dideoxy sequencing  
##Assembly-Data-END##

FEATURES Location/Qualifiers

source 1..603

/organism="Human respiratory syncytial virus B"  
/mol\_type="viral cRNA"  
/isolate="TH-CU/C4065/2013"  
/host="Homo sapiens"  
/db\_xref="taxon:208895"  
/country="Thailand"  
/collection\_date="01-Aug-2013"  
/note="group: B"

CDS <1..603

/note="G protein"  
/codon\_start=1  
/product="attachment glycoprotein"  
/protein\_id="APY20460"  
/translation="IHTNSATISPNTKSETHHTTAQTKGRTSTPTQNNKPSTKPRPKN  
PPKKDDYHFEVFNFPNCNICGNNQLCKSICKTIPSNKPKKKPTTKPTNKPPTKTTNKR  
DPKTLAKTPKKETTINPTKKPTPKTTERDSTPQSTVLDTTTTKHTERDSTPHSTAL  
DTTTSKHTTQQQLHSTTPENTPNSTQTPTAPEPSTSNST"

ORIGIN

1 atccacacaa actcagccac aatatcacct aatacaaaat cagaaacaca ccatacaaca  
61 gcacaaacca aaggcagaac ctctactcca acacagaaca acaagccaag cacaaaacca  
121 cgtccaaaaa atccacaaa aaaagatgat taccatttg aagtgtcaa ctctgtccc  
181 tgaatatat gtggcaacaa tcaactctgc aaatccattt gcaaaacaat accaagcaat  
241 aaaccaaaaga aaaaaccaac taaaaaaccc acaaacaaac cacctaccaa aaccacaaac  
301 aaaagagacc caaaacact agccaaaaca ccgaaaaaag aaaccacat taaccaaca  
361 aaaaaaccaa ccccaagac cacagaaaga gacaccagca cccacaate cactgtgctc  
421 gacacaacca caacaaaaca cacagaaaga gacaccagca cccacacte cactgcgett  
481 gacacaacca catcaaaaaca cacaaccaa cagcaatctc tccactcaac cacccecgaa  
541 aacacacca actccacaca aacaccaca gaccccgagc cctccacate aaattccacc  
601 taa

//

LOCUS KY328120 600 bp cRNA linear VRL 13-DEC-2016

DEFINITION Human respiratory syncytial virus B isolate TH-CU/CB127/2013  
attachment glycoprotein gene, partial cds.

ACCESSION KY328120

VERSION KY328120

KEYWORDS .

SOURCE Human respiratory syncytial virus B

ORGANISM Human respiratory syncytial virus B  
Viruses; ssRNA viruses; ssRNA negative-strand viruses;  
Mononegavirales; Pneumoviridae; Orthopneumovirus.

REFERENCE 1 (bases 1 to 600)

AUTHORS Thongpan,I., Mauleekoonphairoj,J., Vichiwattana,P., Korkong,S.,  
Vongpunsawad,S. and Poovorawan,Y.

TITLE Molecular Characterization of Respiratory Syncytial Virus in  
Thailand, 2012-2015

JOURNAL Unpublished

REFERENCE 2 (bases 1 to 600)

AUTHORS Thongpan,I., Mauleekoonphairoj,J., Vichiwattana,P., Korkong,S.,  
Vongpunsawad,S. and Poovorawan,Y.

TITLE Direct Submission

JOURNAL Submitted (13-DEC-2016) Department of Pediatrics, Center of  
Excellence in Clinical Virology, Faculty of Medicine, Chulalongkorn  
University, Bangkok 10330, Thailand

COMMENT ##Assembly-Data-START##

Assembly Method :: DNASTAR-Lasergene v. 6  
Sequencing Technology :: Sanger dideoxy sequencing  
##Assembly-Data-END##

FEATURES Location/Qualifiers

source 1..600  
/organism="Human respiratory syncytial virus B"  
/mol\_type="viral cRNA"  
/isolate="TH-CU/CB127/2013"  
/host="Homo sapiens"  
/db\_xref="taxon:208895"  
/country="Thailand"  
/collection\_date="01-Nov-2013"  
/note="group: B"

CDS <1..600  
/note="G protein"  
/codon\_start=1  
/product="attachment glycoprotein"  
/protein\_id="APY20461"  
/translation="HTNSATISPNTKSETHHTTAQTKGRTSTPTQNNKPSTKPRPKNP  
PKKDDYHFEVFNFPVPCSIGNNQLCKSICKTIPSNPKKKPTTKPTNKPPTKTTNKRD  
PKTLAKTPKKETTINPTKKPTPKTTERDTSTPQSTMLDTTTSKHTERDTSTSQSIALD  
TTTSKHHTTQQQLYSTTPENTPNSTQTPTASEPTTSNST"

ORIGIN

1 cacacaaact cagccacaat atcaccaat acaaaatcag aaacacacca tacaacagca  
61 caaaccaaag gcagaacctc cactccaaca cagaacaaca agccaagcac aaaaccacgt  
121 ccaaaaaaat caccacaaaa agatgattac cattttgaag tgttcaactt cgttcctgt  
181 agtatatgtg gcaacaatca actctgcaaa tccatttgca aaacaatacc aagcaataaa  
241 ccaagaagaaa aaccaactac aaaaccaca aacaaccac ccaccaaaa cacaaacaaa  
301 agagaccca aacactagc caaacaccg aaaaaagaaa ccaccattaa ccaacacaaa  
361 aaaccaacc ccaagaccac agaaagagac accagaccc cacaatccac tatgetcgac  
421 acaaccacat caaacacac agaaagagac accagacac cacaatccat tgcgcttgac  
481 acaaccacat caaacacac aaccaacag caatctctet actcaaccac ccccgaaaac  
541 acaccaact ccacacaac accacagca tccgagcca ccacatcaa ttccacctaa

//

LOCUS KY328121 603 bp cRNA linear VRL 13-DEC-2016

DEFINITION Human respiratory syncytial virus B isolate TH-CU/CB138/2013  
attachment glycoprotein gene, partial cds.

ACCESSION KY328121

VERSION KY328121

KEYWORDS .

SOURCE Human respiratory syncytial virus B



ORGANISM Human respiratory syncytial virus B  
Viruses; ssRNA viruses; ssRNA negative-strand viruses;  
Mononegavirales; Pneumoviridae; Orthopneumovirus.

REFERENCE 1 (bases 1 to 603)

AUTHORS Thongpan,I., Mauleekoonphairoj,J., Vichiwattana,P., Korkong,S.,  
Vongpunsawad,S. and Poovorawan,Y.

TITLE Molecular Characterization of Respiratory Syncytial Virus in  
Thailand, 2012-2015

JOURNAL Unpublished

REFERENCE 2 (bases 1 to 603)

AUTHORS Thongpan,I., Mauleekoonphairoj,J., Vichiwattana,P., Korkong,S.,  
Vongpunsawad,S. and Poovorawan,Y.

TITLE Direct Submission

JOURNAL Submitted (13-DEC-2016) Department of Pediatrics, Center of  
Excellence in Clinical Virology, Faculty of Medicine, Chulalongkorn  
University, Bangkok 10330, Thailand

COMMENT ##Assembly-Data-START##

Assembly Method :: DNASTAR-Lasergene v. 6  
Sequencing Technology :: Sanger dideoxy sequencing  
##Assembly-Data-END##

FEATURES Location/Qualifiers

source 1..603  
/organism="Human respiratory syncytial virus B"  
/mol\_type="viral cRNA"  
/isolate="TH-CU/CB138/2013"  
/host="Homo sapiens"  
/db\_xref="taxon:208895"  
/country="Thailand"  
/collection\_date="01-Nov-2013"  
/note="group: B"

CDS <1..603  
/note="G protein"  
/codon\_start=1  
/product="attachment glycoprotein"  
/protein\_id="APY20462"  
/translation="IHTNSATISPNTKSETHHTTAQTKGRTSTPTQNNKPSTKPRPKN  
PPKKDDYHFEVFNFVPCSICGNNQLCKSICKTIPSNKPKKKPTTKPTNKPPTKTTNKR  
DPKTLAKTPKKETTINPTKKPTPKTTERDSTPQSTMLDTTTSKHTERDSTSTSQSI  
ALDTTTSKHHTTQQQSLYSTTPENTPNSTQTPTASEPTTSNST"

ORIGIN

1 atccacaaa actcagccac aatataccac aatacaaaat cagaaacaca ccatacaaca  
61 gcacaaacca aaggcagaac ctccactcca acacagaaca acaagccaag cacaaaacca  
121 cgtccaaaaa atccacaaa aaaagatgat taccattttg aagtgttcaa cttegttccc  
181 tgtagtatat gtggcaacaa tcaactctgc aatccattt gcaaaacaat accaagcaat  
241 aaaccaaaaga aaaaaccaac taaaaaaccc acaaacaaac caccaccaa aaccacaaac  
301 aaaagagacc caaaacact agccaaaaca ccgaaaaaag aaaccacat taaccaaca  
361 aaaaaaccaa ccccaagac cacagaaaga gacaccagca cccacaate cactatgctc  
421 gacacaacca catcaaaaca cacagaaaga gacaccagca cctcacaatc cattgcgett  
481 gacacaacca catcaaaaca cacaaccaa cagcaatctc ttactcaac ccccccgaa  
541 aacacacca actccacaca aacaccaca gcatccgagc ccaccacatc aattccacc  
601 taa

//

LOCUS KY328122 603 bp cRNA linear VRL 13-DEC-2016

DEFINITION Human respiratory syncytial virus B isolate TH-CU/CB75/2013

attachment glycoprotein gene, partial cds.  
 ACCESSION KY328122  
 VERSION KY328122  
 KEYWORDS .  
 SOURCE Human respiratory syncytial virus B  
 ORGANISM Human respiratory syncytial virus B  
 Viruses; ssRNA viruses; ssRNA negative-strand viruses;  
 Mononegavirales; Pneumoviridae; Orthopneumovirus.  
 REFERENCE 1 (bases 1 to 603)  
 AUTHORS Thongpan,I., Mauleekoonphairoj,J., Vichiwattana,P., Korkong,S.,  
 Vongpunsawad,S. and Poovorawan,Y.  
 TITLE Molecular Characterization of Respiratory Syncytial Virus in  
 Thailand, 2012-2015  
 JOURNAL Unpublished  
 REFERENCE 2 (bases 1 to 603)  
 AUTHORS Thongpan,I., Mauleekoonphairoj,J., Vichiwattana,P., Korkong,S.,  
 Vongpunsawad,S. and Poovorawan,Y.  
 TITLE Direct Submission  
 JOURNAL Submitted (13-DEC-2016) Department of Pediatrics, Center of  
 Excellence in Clinical Virology, Faculty of Medicine, Chulalongkorn  
 University, Bangkok 10330, Thailand  
 COMMENT ##Assembly-Data-START##  
 Assembly Method :: DNASTAR-Lasergene v. 6  
 Sequencing Technology :: Sanger dideoxy sequencing  
 ##Assembly-Data-END##

FEATURES Location/Qualifiers  
 source 1..603  
 /organism="Human respiratory syncytial virus B"  
 /mol\_type="viral cRNA"  
 /isolate="TH-CU/CB75/2013"  
 /host="Homo sapiens"  
 /db\_xref="taxon:208895"  
 /country="Thailand"  
 /collection\_date="01-Aug-2013"  
 /note="group: B"  
 CDS <1..603  
 /note="G protein"  
 /codon\_start=1  
 /product="attachment glycoprotein"  
 /protein\_id="APY20463"  
 /translation="IHTNSATISPNTKSETHHTTAQTKGRTSTPTQNNKPSTKPRPKN  
 PPKKDDYHFEVFNFPVCSICGNNQLCKSICKTIPSNPKPKKPTTKPTNKPPTKTTNKR  
 DPKTLAKTPKKETTINPTKKPTKTTERTDSTPQSTVLDTTTTSKHTERDSTSQSIAL  
 DTTTSKHTTQQQSLYSTTPENTPNSTQTPTASEPSTSNST"

ORIGIN  
 1 atccacacaa actcagccac aatatcacc aatacaaat cagaaacaca ccatacaaca  
 61 gcacaaacca aaggcagaac ctccactcca acacagaaca acaagccaag cacaaaacca  
 121 cgtccaaaaa atccacaaa aaaagatgat taccatttg aagtgtcaa ctctgtccc  
 181 ttagtatat gtggcaacaa tcaactctgc aaatccattt gcaaaacaat accaagcaat  
 241 aaaccaaaga aaaaaccaac tacaaaaccc acaaacaaac cacctaccaa aaccacaaac  
 301 aaaagagacc ccaaaacact agccaaaaca ccgaaaaaag aaaccacat taaccaaca  
 361 aaaaaaccaa ccccaagac cacagaaaga gacaccagca cccacaate cactgtgctc  
 421 gacacaaca catcaaaaca cacagaaaga gacaccagca ctcacaate cattgcgctt  
 481 gacactacca catcaaaaca cacaaccaa cagcaatctc tctactcaac cacccecgaa

541 aacacacca actccacaca aacaccaca gcatccgagc cctccacatc aaatccacc  
601 taa

//

LOCUS KY328123 600 bp cRNA linear VRL 13-DEC-2016

DEFINITION Human respiratory syncytial virus B isolate TH-CU/CB82/2013  
attachment glycoprotein gene, partial cds.

ACCESSION KY328123

VERSION KY328123

KEYWORDS .

SOURCE Human respiratory syncytial virus B

ORGANISM Human respiratory syncytial virus B

Viruses; ssRNA viruses; ssRNA negative-strand viruses;  
Mononegavirales; Pneumoviridae; Orthopneumovirus.

REFERENCE 1 (bases 1 to 600)

AUTHORS Thongpan,I., Mauleekoonphairoj,J., Vichiwattana,P., Korkong,S.,  
Vongpunsawad,S. and Poovorawan,Y.

TITLE Molecular Characterization of Respiratory Syncytial Virus in  
Thailand, 2012-2015

JOURNAL Unpublished

REFERENCE 2 (bases 1 to 600)

AUTHORS Thongpan,I., Mauleekoonphairoj,J., Vichiwattana,P., Korkong,S.,  
Vongpunsawad,S. and Poovorawan,Y.

TITLE Direct Submission

JOURNAL Submitted (13-DEC-2016) Department of Pediatrics, Center of  
Excellence in Clinical Virology, Faculty of Medicine, Chulalongkorn  
University, Bangkok 10330, Thailand

COMMENT ##Assembly-Data-START##

Assembly Method :: DNASTAR-Lasergene v. 6  
Sequencing Technology :: Sanger dideoxy sequencing  
##Assembly-Data-END##

FEATURES Location/Qualifiers

source 1..600

/organism="Human respiratory syncytial virus B"  
/mol\_type="viral cRNA"  
/isolate="TH-CU/CB82/2013"  
/host="Homo sapiens"  
/db\_xref="taxon:208895"  
/country="Thailand"  
/collection\_date="01-Aug-2013"  
/note="group: B"

CDS <1..600

/note="G protein"  
/codon\_start=1  
/product="attachment glycoprotein"  
/protein\_id="APY20464"  
/translation="HTNSATISPNTKSETHHTTAQTKGRTSTPTQNNKPSTKPRPKNP  
PKKDDYHFEVFNFPVPCISGNNQLCKSICKTIPSNPKPKKPTTKPTNKPPTKTTNKRD  
PKTLAKTPKKETTINPTKKPTPKTTERDTSTPQSTVLDTTTTSKHTERDTSTSQSIALD  
TTTSKHTTQQQLYSTTPENTPNSTQTPTASEPSTSNST"

ORIGIN

1 cacacaaact cagccacaat atcaccat acaaatcag aaacacacca tacaacagca  
61 caaaccaaag gcagaacct cactcaaca cagaacaaca agccaagcac aaaaccacgt  
121 ccaaaaaatc caccaaaaaa agatgattac catttgaag tgttcaact cgttcctgt  
181 agtatatgtg gcaacaatca actctgcaa tccattgca aaacaatacc aagcaataaa

241 ccaagaaaa aaccaactac aaaaccaca aacaaaccac ctaccaaacc cacaacaaaa  
301 agagaccca aacactagc caaacaccg aaaaaagaaa ccaccattaa cccaacaaaa  
361 aaaccaacc ccaagaccac agaaagagac accagcacc cacaatccac tgtgetcgac  
421 acaaccacat caaacacac agaaagagac accagcacct cacaatccat tgcgcttgac  
481 actaccacat caaacacac aaccaacag caatctctct actcaaccac ccccgaaaac  
541 acaccaact ccacacaac acccacagca tccgagcct ccacatcaaa tccacctaa

//

LOCUS KY328124 603 bp cRNA linear VRL 13-DEC-2016

DEFINITION Human respiratory syncytial virus B isolate TH-CU/CB71/2013  
attachment glycoprotein gene, partial cds.

ACCESSION KY328124

VERSION KY328124

KEYWORDS .

SOURCE Human respiratory syncytial virus B

ORGANISM Human respiratory syncytial virus B

Viruses; ssRNA viruses; ssRNA negative-strand viruses;  
Mononegavirales; Pneumoviridae; Orthopneumovirus.

REFERENCE 1 (bases 1 to 603)

AUTHORS Thongpan,I., Mauleekoonphairoj,J., Vichiwattana,P., Korkong,S.,  
Vongpunsawad,S. and Poovorawan,Y.

TITLE Molecular Characterization of Respiratory Syncytial Virus in  
Thailand, 2012-2015

JOURNAL Unpublished

REFERENCE 2 (bases 1 to 603)

AUTHORS Thongpan,I., Mauleekoonphairoj,J., Vichiwattana,P., Korkong,S.,  
Vongpunsawad,S. and Poovorawan,Y.

TITLE Direct Submission

JOURNAL Submitted (13-DEC-2016) Department of Pediatrics, Center of  
Excellence in Clinical Virology, Faculty of Medicine, Chulalongkorn  
University, Bangkok 10330, Thailand

COMMENT ##Assembly-Data-START##

Assembly Method :: DNASTAR-Lasergene v. 6  
Sequencing Technology :: Sanger dideoxy sequencing  
##Assembly-Data-END##

FEATURES Location/Qualifiers

source 1..603

/organism="Human respiratory syncytial virus B"  
/mol\_type="viral cRNA"  
/isolate="TH-CU/CB71/2013"  
/host="Homo sapiens"  
/db\_xref="taxon:208895"  
/country="Thailand"  
/collection\_date="01-Aug-2013"  
/note="group: B"

CDS <1..603

/note="G protein"  
/codon\_start=1  
/product="attachment glycoprotein"  
/protein\_id="APY20465"  
/translation="IHTNSATISPNTKSETHHTTAQTKGRTSTPTQNNKPSTKPRPKN  
PPKKDDYHFEVFNFPVCSICGNNQLCKSICKTIPSNKPKKPTTKPTNKPPTKTTNKR  
DPKTLAKTPKKETTINPTKKPTPKTTERDSTPQSTVLDTTTTSKHTERDSTSQSIAL  
DTTTSKHTTQQQSLYSTTPENTPNSTQTPTASEPSTSNST"

ORIGIN

1 atccacaaa actcagccac aatatacccc aatacaaaat cagaaacaca ccatacaaca  
61 gcacaaacca aaggcagaac ctccactcca acacagaaca acaagccaag cacaaaacca  
121 cgtccaaaaa atccacaaa aaaagatgat taccatttg aagtgtcaa ctctgtccc  
181 tgtagtatat gtggcaacaa tcaactctgc aaatccattt gcaaaacaat accaagcaat  
241 aaaccaaaaga aaaaaccaac tacaaaaccc acaaacaaac cacctaccaa aaccacaaac  
301 aaaagagacc ccaaactact agccaaaaca ccgaaaaaag aaaccacat taaccaaca  
361 aaaaaaccaa ccccaagac cacagaaaga gacaccagca cccacaate cactgtgctc  
421 gacacaacca catcaaaaca cacagaaaga gacaccagca cctcacaatc cattgcgett  
481 gacactacca catcaaaaca cacaaccaa cagcaatctc tctactcaac cacccccgaa  
541 aacacacca actccacaca aacaccaca gcatccgagc cctccacatc aaattccacc  
601 taa

//

LOCUS KY328125 603 bp cRNA linear VRL 13-DEC-2016

DEFINITION Human respiratory syncytial virus B isolate TH-CU/CB47/2013  
attachment glycoprotein gene, partial cds.

ACCESSION KY328125

VERSION KY328125

KEYWORDS .

SOURCE Human respiratory syncytial virus B

ORGANISM Human respiratory syncytial virus B

Viruses; ssRNA viruses; ssRNA negative-strand viruses;  
Mononegavirales; Pneumoviridae; Orthopneumovirus.

REFERENCE 1 (bases 1 to 603)

AUTHORS Thongpan,I., Mauleekoonphairoj,J., Vichiwattana,P., Korkong,S.,  
Vongpunsawad,S. and Poovorawan,Y.

TITLE Molecular Characterization of Respiratory Syncytial Virus in  
Thailand, 2012-2015

JOURNAL Unpublished

REFERENCE 2 (bases 1 to 603)

AUTHORS Thongpan,I., Mauleekoonphairoj,J., Vichiwattana,P., Korkong,S.,  
Vongpunsawad,S. and Poovorawan,Y.

TITLE Direct Submission

JOURNAL Submitted (13-DEC-2016) Department of Pediatrics, Center of  
Excellence in Clinical Virology, Faculty of Medicine, Chulalongkorn  
University, Bangkok 10330, Thailand

COMMENT ##Assembly-Data-START##

Assembly Method :: DNASTAR-Lasergene v. 6  
Sequencing Technology :: Sanger dideoxy sequencing  
##Assembly-Data-END##

FEATURES Location/Qualifiers

source 1..603  
/organism="Human respiratory syncytial virus B"  
/mol\_type="viral cRNA"  
/isolate="TH-CU/CB47/2013"  
/host="Homo sapiens"  
/db\_xref="taxon:208895"  
/country="Thailand"  
/collection\_date="01-Jul-2013"  
/note="group: B"  
CDS <1..603  
/note="G protein"  
/codon\_start=1  
/product="attachment glycoprotein"  
/protein\_id="APY20466"

/translation="IHTNSATISPNTKSETHHTTAQTKGRTSTPTQNNKPSTKPRPKN  
PPKKDDYHFEVFNFPVPCICGNNQLCKSICKTIPSNPKPKKPTTKPTNKPPTKTTNKR  
DPKTLAKTPKKETTINPTKKPTKTTTERDTSTPQSTVLDTTTTSKHTERDTSTSQSIAL  
TTTTSKHTTQQQSLYSTTPENTPNSTQTPTASEPSTSNSST"

ORIGIN

1 atccacacaa actcagccac aatatcacc aatacaaat cagaaacaca ccatacaaca  
61 gcacaaacca aaggcagaac ctccactcca acacagaaca acaagccaag cacaaaacca  
121 cgtccaaaaa atccacaaa aaaagatgat taccatttg aagtgtcaa ctctgtccc  
181 tgtagtatat gtggcaacaa tcaactctgc aaatccattt gcaaaacaat accaagcaat  
241 aaaccaaaaga aaaaaccaac taaaaaacc acaaaaaaac cacctaccaa aaccacaaac  
301 aaaagagacc caaaaaact agccaaaaca cgaaaaaag aaaccacat taaccaaca  
361 aaaaaaccaa ccccaagac cacagaaaga gacaccagca cccacaate cactgtgctc  
421 gacacaacca catcaaaaca cacagaaaga gacaccagca ctcacaate cattgcgctt  
481 gacactacca catcaaaaca cacaaccaa cagcaatctc tctactcaac caccccggaa  
541 aacacacca actccacaca aacaccaca geatccgagc cctccacate aaatccacc  
601 taa

//

LOCUS KY328126 603 bp cRNA linear VRL 13-DEC-2016

DEFINITION Human respiratory syncytial virus B isolate TH-CU/CB84/2013  
attachment glycoprotein gene, partial cds.

ACCESSION KY328126

VERSION KY328126

KEYWORDS .

SOURCE Human respiratory syncytial virus B

ORGANISM Human respiratory syncytial virus B

Viruses; ssRNA viruses; ssRNA negative-strand viruses;  
Mononegavirales; Pneumoviridae; Orthopneumovirus.

REFERENCE 1 (bases 1 to 603)

AUTHORS Thongpan,I., Mauleekoonphairoj,J., Vichiwattana,P., Korkong,S.,  
Vongpunsawad,S. and Poovorawan,Y.

TITLE Molecular Characterization of Respiratory Syncytial Virus in  
Thailand, 2012-2015

JOURNAL Unpublished

REFERENCE 2 (bases 1 to 603)

AUTHORS Thongpan,I., Mauleekoonphairoj,J., Vichiwattana,P., Korkong,S.,  
Vongpunsawad,S. and Poovorawan,Y.

TITLE Direct Submission

JOURNAL Submitted (13-DEC-2016) Department of Pediatrics, Center of  
Excellence in Clinical Virology, Faculty of Medicine, Chulalongkorn  
University, Bangkok 10330, Thailand

COMMENT ##Assembly-Data-START##

Assembly Method :: DNASTAR-Lasergene v. 6  
Sequencing Technology :: Sanger dideoxy sequencing  
##Assembly-Data-END##

FEATURES Location/Qualifiers

source 1..603  
/organism="Human respiratory syncytial virus B"  
/mol\_type="viral cRNA"  
/isolate="TH-CU/CB84/2013"  
/host="Homo sapiens"  
/db\_xref="taxon:208895"  
/country="Thailand"  
/collection\_date="01-Aug-2013"  
/note="group: B"

CDS <1..603  
/note="G protein"  
/codon\_start=1  
/product="attachment glycoprotein"  
/protein\_id="APY20467"  
/translation="IHTNSATISPNTKSETHHTTAQTKGRTSTPTQNNKPSTKPRPKN  
PPKKDDYHFEVFNFVPCISICGNNQLCKSICKTIPSNKPKKKPTTKPTNKPPTKTTNKR  
DPKTLAKTPKKETTINPTKKPTPKTTERDTSTPQSTVLDTTTTSKHTERDTSTSQSIAL  
TTTTSKHTTQQQSLYSTTPENTPNSTQTPTASEPSTSNST"

ORIGIN

1 atccacacaa actcagccac aatatacccc aatacaaaat cagaaacaca ccatacaaca  
61 gcacaaacca aaggcagaac ctccactcca acacagaaca acaagccaag cacaaaacca  
121 cgtccaaaaa atccacaaa aaaagatgat taccatttg aagtgtcaa ctctgtccc  
181 tgtagtatat gtggcaacaa tcaactctgc aatccattt gcaaaacaat accaagcaat  
241 aaaccaaaaga aaaaaccaac taaaaaccc acaaacaaac cacctaccaa aaccacaaac  
301 aaaagagacc caaaacact agccaaaaca ccgaaaaaag aaaccacat taaccaaca  
361 aaaaaaccaa cccaagac cacagaaga gacaccagca cccacaatc cactgtgctc  
421 gacacaacca catcaaaaca cacagaaaga gacaccagca cctcacaatc cattgcgctt  
481 gacactacca catcaaaaca cacaaccaa cagcaatctc tctactcaac cacccecgaa  
541 aacacacca actccacaca aacaccaca gcatccgagc cctccacatc aaattccacc  
601 taa

//

LOCUS KY328127 603 bp cRNA linear VRL 13-DEC-2016  
DEFINITION Human respiratory syncytial virus B isolate TH-CU/CB129/2013  
attachment glycoprotein gene, partial cds.

ACCESSION KY328127

VERSION KY328127

KEYWORDS .

SOURCE Human respiratory syncytial virus B

ORGANISM Human respiratory syncytial virus B

Viruses; ssRNA viruses; ssRNA negative-strand viruses;  
Mononegavirales; Pneumoviridae; Orthopneumovirus.

REFERENCE 1 (bases 1 to 603)

AUTHORS Thongpan,I., Mauleekoonphairoj,J., Vichiwattana,P., Korkong,S.,  
Vongpunsawad,S. and Poovorawan,Y.

TITLE Molecular Characterization of Respiratory Syncytial Virus in  
Thailand, 2012-2015

JOURNAL Unpublished

REFERENCE 2 (bases 1 to 603)

AUTHORS Thongpan,I., Mauleekoonphairoj,J., Vichiwattana,P., Korkong,S.,  
Vongpunsawad,S. and Poovorawan,Y.

TITLE Direct Submission

JOURNAL Submitted (13-DEC-2016) Department of Pediatrics, Center of  
Excellence in Clinical Virology, Faculty of Medicine, Chulalongkorn  
University, Bangkok 10330, Thailand

COMMENT ##Assembly-Data-START##

Assembly Method :: DNASTAR-Lasergene v. 6  
Sequencing Technology :: Sanger dideoxy sequencing  
##Assembly-Data-END##

FEATURES Location/Qualifiers

source 1..603  
/organism="Human respiratory syncytial virus B"  
/mol\_type="viral cRNA"  
/isolate="TH-CU/CB129/2013"

/host="Homo sapiens"  
/db\_xref="taxon:208895"  
/country="Thailand"  
/collection\_date="01-Nov-2013"  
/note="group: B"  
CDS <1..603  
/note="G protein"  
/codon\_start=1  
/product="attachment glycoprotein"  
/protein\_id="APY20468"  
/translation="IHTNSATISPNTKSETHHTTAQTKGRTSTPTQNNKPSTKPRPKN  
PSKKDDYHFEVFNFPVCSICGNNQLCKSICKTIPSNKPKKPTTKPTNKPPTKTTDKR  
DPKTLAKTPKKETTINPTKKPTKTTERTDSTPQSTVLDTTTSKHTERDTSTSQSIAL  
DTTTSKHTTQQQSLYSTTPENTPNSTQTPTASEPSTSNST"

ORIGIN

1 atccacaaa actcagccac aatataccac aatacaaaat cagaaacaca ccatacaaca  
61 gcacaaacca aaggcagaac ctccactcca acacagaaca acaagccaag cacaaaacca  
121 cgtccaaaaa atccatcaaa aaaagatgat taccatttg aagtgttcaa ctctgtccc  
181 ttagtatat gtggcaacaa tcaactctgc aatccattt gaaaaacaat accaagcaat  
241 aaaccaaaaga aaaaaccaac taaaaaaccc acaaacaaac cacctaccaa aaccacagac  
301 aaaagagacc caaaacact agccaaaaca ccgaaaaaag aaaccacat taaccaaca  
361 aaaaaaccaa cccaagac cacagaaaga gacaccagca cccacaatc cactgtgctc  
421 gacacaacca catcaaaaca cacagaaaga gacaccagca ctcacaatc cattgctt  
481 gacactacca catcaaaaca cacaaccaa cageaatctc tctactcaac ccccccgaa  
541 aacacacca actccacaca aacaccaca geatccgagc cctccacatc aattecacc  
601 taa

//

LOCUS KY328128 603 bp cRNA linear VRL 13-DEC-2016

DEFINITION Human respiratory syncytial virus B isolate TH-CU/CB18/2013  
attachment glycoprotein gene, partial cds.

ACCESSION KY328128

VERSION KY328128

KEYWORDS .

SOURCE Human respiratory syncytial virus B

ORGANISM Human respiratory syncytial virus B

Viruses; ssRNA viruses; ssRNA negative-strand viruses;  
Mononegavirales; Pneumoviridae; Orthopneumovirus.

REFERENCE 1 (bases 1 to 603)

AUTHORS Thongpan,I., Mauleekoonphairoj,J., Vichiwattana,P., Korkong,S.,  
Vongpunsawad,S. and Poovorawan,Y.

TITLE Molecular Characterization of Respiratory Syncytial Virus in  
Thailand, 2012-2015

JOURNAL Unpublished

REFERENCE 2 (bases 1 to 603)

AUTHORS Thongpan,I., Mauleekoonphairoj,J., Vichiwattana,P., Korkong,S.,  
Vongpunsawad,S. and Poovorawan,Y.

TITLE Direct Submission

JOURNAL Submitted (13-DEC-2016) Department of Pediatrics, Center of  
Excellence in Clinical Virology, Faculty of Medicine, Chulalongkorn  
University, Bangkok 10330, Thailand

COMMENT ##Assembly-Data-START##

Assembly Method :: DNASTAR-Lasergene v. 6  
Sequencing Technology :: Sanger dideoxy sequencing  
##Assembly-Data-END##



FEATURES Location/Qualifiers

source 1..603  
/organism="Human respiratory syncytial virus B"  
/mol\_type="viral cRNA"  
/isolate="TH-CU/CB18/2013"  
/host="Homo sapiens"  
/db\_xref="taxon:208895"  
/country="Thailand"  
/collection\_date="01-Jul-2013"  
/note="group: B"

CDS <1..603  
/note="G protein"  
/codon\_start=1  
/product="attachment glycoprotein"  
/protein\_id="APY20469"  
/translation="IHTNSATISPNTKSETHHTTAQTKGRTSTPTQNNKPSTKPRPKN  
PPKKDDYHFEVFNFPVCSICGNNQLCKSICKTIPSNPKPKKPTTKPTNKPPTKTTNKR  
DPKTLAKTPKKETTINPTKKPTKPTTERDTSTPQSTVLDTTTTSKHTERDTSTSQSIAL  
DTTTSKHTTQQQSLYSTTPENTPNSTQTPTASEPSTSNST"

ORIGIN

1 atccacacaa actcagccac aatatacccc aatacaaaat cagaaacaca ccatacaaca  
61 gcacaaacca aaggcagaac ctccactcca acacagaaca acaagccaag cacaaaacca  
121 cgtccaaaaa atccacaaa aaaagatgat taccattttg aagtgttcaa cttegttccc  
181 tgtagtatat gtggcaacaa tcaactctgc aaatccattt gcaaaacaat accaagcaat  
241 aaaccaaaga aaaaaccaac taaaaaacc acaaacaaac cacctaccaa aaccacaaac  
301 aaaagagacc caaaacact agccaaaaca ccgaaaaaag aaaccacat taaccaaca  
361 aaaaaacaa ccccaagac cacagaaaga gacacaagca cccacaatc cactgtgctc  
421 gacacaacca catcaaaaca cacagaaaga gacaccagca cctcacaatc cattgcgett  
481 gacactacca catcaaaaca cacaaccaa cagcaatctc tctactcaac cacccccgaa  
541 aacacacca actccacaca aacaccaca gcatccgagc cctccacatc aaattccacc  
601 taa

//

LOCUS KY328129 603 bp cRNA linear VRL 13-DEC-2016  
DEFINITION Human respiratory syncytial virus B isolate TH-CU/CB137/2013  
attachment glycoprotein gene, partial cds.

ACCESSION KY328129

VERSION KY328129

KEYWORDS .

SOURCE Human respiratory syncytial virus B

ORGANISM Human respiratory syncytial virus B

Viruses; ssRNA viruses; ssRNA negative-strand viruses;  
Mononegavirales; Pneumoviridae; Orthopneumovirus.

REFERENCE 1 (bases 1 to 603)

AUTHORS Thongpan,I., Mauleekoonphairoj,J., Vichiwattana,P., Korkong,S.,  
Vongpunsawad,S. and Poovorawan,Y.

TITLE Molecular Characterization of Respiratory Syncytial Virus in  
Thailand, 2012-2015

JOURNAL Unpublished

REFERENCE 2 (bases 1 to 603)

AUTHORS Thongpan,I., Mauleekoonphairoj,J., Vichiwattana,P., Korkong,S.,  
Vongpunsawad,S. and Poovorawan,Y.

TITLE Direct Submission

JOURNAL Submitted (13-DEC-2016) Department of Pediatrics, Center of  
Excellence in Clinical Virology, Faculty of Medicine, Chulalongkorn

University, Bangkok 10330, Thailand

COMMENT ##Assembly-Data-START##

Assembly Method :: DNASTAR-Lasergene v. 6  
Sequencing Technology :: Sanger dideoxy sequencing  
##Assembly-Data-END##

FEATURES Location/Qualifiers

source 1..603  
/organism="Human respiratory syncytial virus B"  
/mol\_type="viral cRNA"  
/isolate="TH-CU/CB137/2013"  
/host="Homo sapiens"  
/db\_xref="taxon:208895"  
/country="Thailand"  
/collection\_date="01-Nov-2013"  
/note="group: B"

CDS <1..603  
/note="G protein"  
/codon\_start=1  
/product="attachment glycoprotein"  
/protein\_id="APY20470"  
/translation="IHTNSATISPNTKSETHHTTAQTKGRTSTPTQNNKPSTKPRPKN  
PPKKDDYHFEVFNFPVCSICGNNQLCKSICKTIPSNPKPKKPTTKPTNKPPTKTTNKR  
DPKTLAKTPKKETTTNPTKKPTKTERDTSTPQSTVLDTTTTSKHTERDTSTSQSIAL  
DTTTSKHTTQQQSLYSTTPENTPNSTQTPTASEPSTSNST"

ORIGIN

1 atccacaaa actcagccac aatatcacc aatacaaat cagaaacaca ccatacaaca  
61 gcacaaacca aaggcgaac ctccactcca acacagaaca acaagccaag cacaaaaacca  
121 cgtccaaaaa atccacaaa aaaagatgat taccatttg aagtggtcaa ctctgtccc  
181 tgtagtatat gtggcaacaa tcaactctgc aaatccattt gcaaaacaat accaagcaat  
241 aaaccaaaga aaaaaccaac taaaaaccc acaaacaaac cacctaccaa aaccacaaac  
301 aaaagagacc ccaaaacact agccaaaaca cgaaaaaag aaaccaccac caaccaaca  
361 aaaaaaccaa cccccaagac cacagaaaga gacaccagca cccacaate cactgtgctc  
421 gacacaacca catcaaaaca cacagaaaga gacaccagca ctcacaate cattgcgctt  
481 gacacaacca catcaaaaca cacaaccaa cagcagtctc ttactcaac cacccccgaa  
541 aacacacca actccacaca aacaccaca geatccgagc cctccacate aaatccacc  
601 taa

//

LOCUS KY328130 624 bp cRNA linear VRL 13-DEC-2016

DEFINITION Human respiratory syncytial virus B isolate TH-CU/C3115/2012  
attachment glycoprotein gene, partial cds.

ACCESSION KY328130

VERSION KY328130

KEYWORDS .

SOURCE Human respiratory syncytial virus B

ORGANISM Human respiratory syncytial virus B

Viruses; ssRNA viruses; ssRNA negative-strand viruses;  
Mononegavirales; Pneumoviridae; Orthopneumovirus.

REFERENCE 1 (bases 1 to 624)

AUTHORS Thongpan,I., Mauleekoonphairoj,J., Vichiwattana,P., Korkong,S.,  
Vongpunsawad,S. and Poovorawan,Y.

TITLE Molecular Characterization of Respiratory Syncytial Virus in  
Thailand, 2012-2015

JOURNAL Unpublished

REFERENCE 2 (bases 1 to 624)

AUTHORS Thongpan,I., Mauleekoonphairoj,J., Vichiwattana,P., Korkong,S.,  
Vongpunsawad,S. and Poovorawan,Y.

TITLE Direct Submission

JOURNAL Submitted (13-DEC-2016) Department of Pediatrics, Center of  
Excellence in Clinical Virology, Faculty of Medicine, Chulalongkorn  
University, Bangkok 10330, Thailand

COMMENT ##Assembly-Data-START##

Assembly Method :: DNASTAR-Lasergene v. 6  
Sequencing Technology :: Sanger dideoxy sequencing  
##Assembly-Data-END##

FEATURES Location/Qualifiers

source 1..624  
/organism="Human respiratory syncytial virus B"  
/mol\_type="viral cRNA"  
/isolate="TH-CU/C3115/2012"  
/host="Homo sapiens"  
/db\_xref="taxon:208895"  
/country="Thailand"  
/collection\_date="01-Aug-2012"  
/note="group: B"

CDS <1..624  
/note="G protein"  
/codon\_start=1  
/product="attachment glycoprotein"  
/protein\_id="APY20471"  
/translation="IHTNSATISPNTKSETHHTTAQTKGRTSTPTQNNKPSTKPRPKN  
PPKKDDYHFEVFNFPVCSICGNNQLCKSICKTIPSNKPKKPTTKPTNKPPTKTTNKR  
DPKPLAKTPKKETTINPTKKPTKTTTERDTSTPQSTVLDTTTTSKHTERDTSTSQSIAL  
DTTTSKHTTQQQSLYSTTPENTPNSTQTPTASEPSTSNSTQKLQSYA"

ORIGIN

1 atccacaaa actcagccac aatataccac aatacaaaat cagaaacaca ccatacaaca  
61 gcacaaacca aaggcagaac ctccactcca acacagaaca acaagccaag cacaaaacca  
121 cgtccaaaaa atccacaaa aaaagatgat taccatttg aagtgtcaa ctctgtccc  
181 ttagtatat gtggcaaca tcaactctgc aatccattt gcaaaacaat accaagcaat  
241 aaaccaaaaga aaaaaccaac taaaaaaccc acaaacaaac caccaccaa aaccacaaac  
301 aaaagagacc ccaaaccact agccaaaaca ccgaaaaaag aaaccacat caaccaaca  
361 aaaaaaccaa ccccaagac cacagaaga gacaccagca cccacaatc cactgtgetc  
421 gacacaaca catcaaaaca cacagaaga gacaccagca ctcacaatc cattgcgctt  
481 gacacaaca catcaaaaca cacaaccaa cagcaatctc tctactcaac ccccccgaa  
541 aacacacca actccacaca aacaccaca gcatccgagc cctccacate aaattccacc  
601 caaaaactcc agtcatatgc ttag

//

LOCUS KY328131 624 bp cRNA linear VRL 13-DEC-2016  
DEFINITION Human respiratory syncytial virus B isolate TH-CU/B10985/2014  
attachment glycoprotein gene, partial cds.

ACCESSION KY328131

VERSION KY328131

KEYWORDS .

SOURCE Human respiratory syncytial virus B

ORGANISM Human respiratory syncytial virus B  
Viruses; ssRNA viruses; ssRNA negative-strand viruses;  
Mononegavirales; Pneumoviridae; Orthopneumovirus.

REFERENCE 1 (bases 1 to 624)

AUTHORS Thongpan,I., Mauleekoonphairoj,J., Vichiwattana,P., Korkong,S.,

Vongpunsawad,S. and Poovorawan,Y.

TITLE Molecular Characterization of Respiratory Syncytial Virus in Thailand, 2012-2015

JOURNAL Unpublished

REFERENCE 2 (bases 1 to 624)

AUTHORS Thongpan,I., Mauleekoonphairoj,J., Vichiwattana,P., Korkong,S., Vongpunsawad,S. and Poovorawan,Y.

TITLE Direct Submission

JOURNAL Submitted (13-DEC-2016) Department of Pediatrics, Center of Excellence in Clinical Virology, Faculty of Medicine, Chulalongkorn University, Bangkok 10330, Thailand

COMMENT ##Assembly-Data-START##

Assembly Method :: DNASTAR-Lasergene v. 6  
Sequencing Technology :: Sanger dideoxy sequencing  
##Assembly-Data-END##

FEATURES Location/Qualifiers

source 1..624  
/organism="Human respiratory syncytial virus B"  
/mol\_type="viral cRNA"  
/isolate="TH-CU/B10985/2014"  
/host="Homo sapiens"  
/db\_xref="taxon:208895"  
/country="Thailand"  
/collection\_date="12-Sep-2014"  
/note="group: B"

CDS <1..624  
/note="G protein"  
/codon\_start=1  
/product="attachment glycoprotein"  
/protein\_id="APY20472"  
/translation="IHTNSATISPNTKSETHHTTAQTKGRTSTPTQNNKPSTKPRPKN  
PPKKDDYHFEVFNFPVCSICGNNQLCKSICKTIPSNKPKKPTTKPTNKPPTKTTNKR  
DPKTLAKTPKKETTINPTKKPTPKTTERDSTPQSTVLDTTISKHTERDTSTSQSIAL  
DTTTSKHTTQQQSLYSTTPENTPNSAQTPTASEPSTSNSTQKLQSYA"

ORIGIN

1 atccacacaa actcagccac aatatcacct aatacaaaat cagaaacaca ccatacaaca  
61 gcacaaacca aaggcagaac ctctactcca acacagaaca acaagccaag cacaaaacca  
121 cgtccaaaaa atccacaaa aaaagatgat taccatttg aagtgtcaa ctctgtccc  
181 ttagtatat gtggcaacaa tcaactctgc aaatccattt gcaaaacaat accaagcaat  
241 aaaccaaaga aaaaaccaac cacaaaacce acaaaacaac caccaccaa aaccacaaac  
301 aaaagagacc caaaacact agccaaaaca ccgaaaaaag aaaccacat taaccaaca  
361 aaaaaccaa ccccaagac cacagaaaga gacaccagca cccacaatc cactgtgctc  
421 gacacaacca tatcaaaaca cacagaaaga gacaccagca cctcacaatc cattgeactt  
481 gacacaacca catcaaaaca cacaaccaa cagcaatctc tetactcaac cacccccgaa  
541 aacacacca actccgcaca aacaccaca gcatccgagc cctccacatc aaatccacc  
601 caaaaactcc agtcatatgc ttag

//

LOCUS KY328132 603 bp cRNA linear VRL 13-DEC-2016

DEFINITION Human respiratory syncytial virus B isolate TH-CU/C4144/2013 attachment glycoprotein gene, partial cds.

ACCESSION KY328132

VERSION KY328132

KEYWORDS .

SOURCE Human respiratory syncytial virus B

ORGANISM Human respiratory syncytial virus B  
Viruses; ssRNA viruses; ssRNA negative-strand viruses;  
Mononegavirales; Pneumoviridae; Orthopneumovirus.

REFERENCE 1 (bases 1 to 603)

AUTHORS Thongpan,I., Mauleekoonphairoj,J., Vichiwattana,P., Korkong,S.,  
Vongpunsawad,S. and Poovorawan,Y.

TITLE Molecular Characterization of Respiratory Syncytial Virus in  
Thailand, 2012-2015

JOURNAL Unpublished

REFERENCE 2 (bases 1 to 603)

AUTHORS Thongpan,I., Mauleekoonphairoj,J., Vichiwattana,P., Korkong,S.,  
Vongpunsawad,S. and Poovorawan,Y.

TITLE Direct Submission

JOURNAL Submitted (13-DEC-2016) Department of Pediatrics, Center of  
Excellence in Clinical Virology, Faculty of Medicine, Chulalongkorn  
University, Bangkok 10330, Thailand

COMMENT ##Assembly-Data-START##

Assembly Method :: DNASTAR-Lasergene v. 6  
Sequencing Technology :: Sanger dideoxy sequencing  
##Assembly-Data-END##

FEATURES Location/Qualifiers

source 1..603  
/organism="Human respiratory syncytial virus B"  
/mol\_type="viral cRNA"  
/isolate="TH-CU/C4144/2013"  
/host="Homo sapiens"  
/db\_xref="taxon:208895"  
/country="Thailand"  
/collection\_date="01-Sep-2013"  
/note="group: B"

CDS <1..603  
/note="G protein"  
/codon\_start=1  
/product="attachment glycoprotein"  
/protein\_id="APY20473"  
/translation="IHTNSATISPNTKSETHHTTAQTKGRTSTPTQNNKPSTKPRPKN  
PPKKDDYHFEVFNFVPCSICGNNQLCKSICKTIPSNKPKKKPTTKPTNKPPTKTTNKR  
DPKTLAKTPKKETTINPTKKPTPKTTERDTSTSQSTVLDTTTTSKHTERDTSTPQSTAL  
DTTTSKHTTQQQLHSTTPENTPNSTQTPTASEPSTSNST"

ORIGIN

1 atccacaaa actcagccac aatataccac aatacaaaat cagaaacaca ccacacaaca  
61 gcacaaacca aaggcagaac ctctactcca acacagaaca acaagccaag cacaaaacca  
121 cgtccaaaaa atccacaaa aaaagatgat taccatttg aagtgtca cctcgttccc  
181 tgtagtatat gtggcaacaa tcaactctgc aaatccattt gcaaaacaat accaagcaat  
241 aaaccaaaaga aaaaaccaac taaaaaacc acaaaaaaac cacctaccaa aaccacaaac  
301 aaaagagacc ccaaaacact agccaaaaca ccgaaaaaag aaaccacat taaccaaca  
361 aaaaaaccaa cccccaaaac cacagaaaga gacaccagca cctcacagtc cactgtgctc  
421 gacacaacca catcaaaaca cacagaaaga gacaccagca cccacaate cactgcgctt  
481 gacacaacca catcaaaaca cacaaccaa cagcaatctc tcaactcaac cacccccgaa  
541 aacacacca actccacaca aacaccaca gcatccgagc cctccacatc aattccacc  
601 taa

//

LOCUS KY328133 603 bp cRNA linear VRL 13-DEC-2016

DEFINITION Human respiratory syncytial virus B isolate TH-CU/C5090/2014

attachment glycoprotein gene, partial cds.

ACCESSION KY328133

VERSION KY328133

KEYWORDS .

SOURCE Human respiratory syncytial virus B

ORGANISM Human respiratory syncytial virus B  
 Viruses; ssRNA viruses; ssRNA negative-strand viruses;  
 Mononegavirales; Pneumoviridae; Orthopneumovirus.

REFERENCE 1 (bases 1 to 603)

AUTHORS Thongpan,I., Mauleekoonphairoj,J., Vichiwattana,P., Korkong,S.,  
 Vongpunsawad,S. and Poovorawan,Y.

TITLE Molecular Characterization of Respiratory Syncytial Virus in  
 Thailand, 2012-2015

JOURNAL Unpublished

REFERENCE 2 (bases 1 to 603)

AUTHORS Thongpan,I., Mauleekoonphairoj,J., Vichiwattana,P., Korkong,S.,  
 Vongpunsawad,S. and Poovorawan,Y.

TITLE Direct Submission

JOURNAL Submitted (13-DEC-2016) Department of Pediatrics, Center of  
 Excellence in Clinical Virology, Faculty of Medicine, Chulalongkorn  
 University, Bangkok 10330, Thailand

COMMENT ##Assembly-Data-START##  
 Assembly Method :: DNASTAR-Lasergene v. 6  
 Sequencing Technology :: Sanger dideoxy sequencing  
 ##Assembly-Data-END##

FEATURES Location/Qualifiers

source 1..603  
 /organism="Human respiratory syncytial virus B"  
 /mol\_type="viral cRNA"  
 /isolate="TH-CU/C5090/2014"  
 /host="Homo sapiens"  
 /db\_xref="taxon:208895"  
 /country="Thailand"  
 /collection\_date="01-Sep-2014"  
 /note="group: B"

CDS <1..603  
 /note="G protein"  
 /codon\_start=1  
 /product="attachment glycoprotein"  
 /protein\_id="APY20474"  
 /translation="IHTNSATISPNTKSETHHTTAQTKGRTSTPTQNNKPSTKPRPKN  
 PPKKDDYHFEVFNFPVCSICGNNQLCKSICKTIPSNPKPKKPTTKPTNKPPTKTTNKR  
 DPKTLAKTPKKETTINPTKKPTKTTERTDSTPQSTVLDTTTTSKHTERDTSTSQSIAL  
 DTTTSKQTTQQLSLYSTTPENTPNSTQTPTASEPSTSNST"

ORIGIN

1 atccacacaa actcagccac aatatcacc aatacaaat cagaaacaca ccatacaaca  
 61 gcacaaacca aaggcagaac ctccactcca acacagaaca acaagccaag cacaaaacca  
 121 cgtccaaaaa atccacaaa aaaagatgat taccatttg aagtgtcaa ctctgtccc  
 181 tgtagtatat gtggcaacaa tcaactctgc aaatccattt gcaaaacaat accaagcaat  
 241 aaaccaaaga aaaaaccaac tacaaaaccc acaaacaaac cacctaccaa aaccacaaac  
 301 aaaagagacc ccaaaacact agccaaaaca ccgaaaaaag aaaccacat taaccaaca  
 361 aaaaaaccaa ccccaagac cacagaaaga gacaccagca cccacaate cactgtgctc  
 421 gacacaaca catcaaaaca cacagaaaga gacaccagca ctcacaate cattgcgctt  
 481 gacacaaca catcaaaaca acaacccaa cagctatctc tctactcaac cacccecgaa

541 aacacacca actccacaca aacaccaca gcatccgagc cctccacatc aaatfecacc  
601 taa

//

LOCUS KY328134 591 bp cRNA linear VRL 13-DEC-2016  
DEFINITION Human respiratory syncytial virus B isolate TH-CU/C5155/2014  
attachment glycoprotein gene, partial cds.

ACCESSION KY328134

VERSION KY328134

KEYWORDS .

SOURCE Human respiratory syncytial virus B

ORGANISM Human respiratory syncytial virus B

Viruses; ssRNA viruses; ssRNA negative-strand viruses;  
Mononegavirales; Pneumoviridae; Orthopneumovirus.

REFERENCE 1 (bases 1 to 591)

AUTHORS Thongpan,I., Mauleekoonphairoj,J., Vichiwattana,P., Korkong,S.,  
Vongpunsawad,S. and Poovorawan,Y.

TITLE Molecular Characterization of Respiratory Syncytial Virus in  
Thailand, 2012-2015

JOURNAL Unpublished

REFERENCE 2 (bases 1 to 591)

AUTHORS Thongpan,I., Mauleekoonphairoj,J., Vichiwattana,P., Korkong,S.,  
Vongpunsawad,S. and Poovorawan,Y.

TITLE Direct Submission

JOURNAL Submitted (13-DEC-2016) Department of Pediatrics, Center of  
Excellence in Clinical Virology, Faculty of Medicine, Chulalongkorn  
University, Bangkok 10330, Thailand

COMMENT ##Assembly-Data-START##

Assembly Method :: DNASTAR-Lasergene v. 6  
Sequencing Technology :: Sanger dideoxy sequencing  
##Assembly-Data-END##

FEATURES Location/Qualifiers

source 1..591  
/organism="Human respiratory syncytial virus B"  
/mol\_type="viral cRNA"  
/isolate="TH-CU/C5155/2014"  
/host="Homo sapiens"  
/db\_xref="taxon:208895"  
/country="Thailand"  
/collection\_date="01-Oct-2014"  
/note="group: B"

CDS <1..591  
/note="G protein"  
/codon\_start=1  
/product="attachment glycoprotein"  
/protein\_id="APY20475"  
/translation="SATISPNTKSETHHTTAQTKGRTSTPTQNNKPSTKPRPKNPPKK  
DDYHFEVFNFPVPCSIGNNQLCKSICKTIPSNPKKKPTTKPTNKPPTKTTNKRDPKT  
LAKTPKKETTINPTKKPTPKTTERDTSTPQSTVLDTTTTSKHTERDTSTSQSIALDTT  
SKQTTQQLSLYSTTPENTPNSTQTPTASEPSTSNST"

ORIGIN

1 tcagccacaa taccaccaa tacaaaatca gaaacacacc atacaacagc acaaaccaa  
61 ggagaaacct cactccaac acagaacaac aagccaagca caaaaccag tcaaaaaat  
121 ccacaaaaaa aagatgatta ccatttgaa gtgttcaact tcgttcctg tagtatatgt  
181 ggcaacaatc aactctgcaa atccatttgc aaaacaatac caagcaataa accaaagaaa

241 aaaccaacta caaaacccac aaacaacca cctaccaaaa ccacaacaa aagagacccc  
301 aaaacactag ccaaacacc gaaaaagaa accaccatta acccaacaaa aaaaccaacc  
361 cccaagacca cagaaagaga caccagcacc ccacaatcca ctgtgctoga cacaaccaca  
421 taaaacaca cagaaagaga caccagcacc tcacaatcca ttgcgcttga cacaaccaca  
481 taaaacaaa caaccaaca gctatctctc tactcaacca cccccgaaaa cacaccaac  
541 tcacacaaa caccacagc atccgagccc tcacatcaa attccaccta a

//

LOCUS KY328135 624 bp cRNA linear VRL 13-DEC-2016

DEFINITION Human respiratory syncytial virus B isolate TH-CU497/2012  
attachment glycoprotein gene, partial cds.

ACCESSION KY328135

VERSION KY328135

KEYWORDS .

SOURCE Human respiratory syncytial virus B

ORGANISM Human respiratory syncytial virus B

Viruses; ssRNA viruses; ssRNA negative-strand viruses;  
Mononegavirales; Pneumoviridae; Orthopneumovirus.

REFERENCE 1 (bases 1 to 624)

AUTHORS Thongpan,I., Mauleekoonphairoj,J., Vichiwattana,P., Korkong,S.,  
Vongpunsawad,S. and Poovorawan,Y.

TITLE Molecular Characterization of Respiratory Syncytial Virus in  
Thailand, 2012-2015

JOURNAL Unpublished

REFERENCE 2 (bases 1 to 624)

AUTHORS Thongpan,I., Mauleekoonphairoj,J., Vichiwattana,P., Korkong,S.,  
Vongpunsawad,S. and Poovorawan,Y.

TITLE Direct Submission

JOURNAL Submitted (13-DEC-2016) Department of Pediatrics, Center of  
Excellence in Clinical Virology, Faculty of Medicine, Chulalongkorn  
University, Bangkok 10330, Thailand

COMMENT ##Assembly-Data-START##

Assembly Method :: DNASTAR-Lasergene v. 6  
Sequencing Technology :: Sanger dideoxy sequencing  
##Assembly-Data-END##

FEATURES Location/Qualifiers

source 1..624

/organism="Human respiratory syncytial virus B"  
/mol\_type="viral cRNA"  
/isolate="TH-CU497/2012"  
/host="Homo sapiens"  
/db\_xref="taxon:208895"  
/country="Thailand"  
/collection\_date="01-Nov-2012"  
/note="group: B"

CDS <1..624

/note="G protein"  
/codon\_start=1  
/product="attachment glycoprotein"  
/protein\_id="APY20476"  
/translation="IHTNSATISPNTKSETHHTTAQTKGRTSTPTQNNKPSTKPRPKN  
PPKKDDYHFEVFNFPVCSICGNNQLCKSICKTIPSNKPKKPTTKPTNKPPTKTTNKR  
DPKTLAKTPKKETTINPTKKPTPKTTERDSTPQSTVLDTTTTSKHTERDSTPQSIAL  
DTTTSKHTTQQQSPYSTTPENTHNSTQTPTASEPSTSNSSTQKLQSYA"

ORIGIN



1 atccacaaa actcagccac aatataccac aacacaaaat cagaaacaca ccatacaaca  
61 gcacaaacca aaggcagaac ctctactcca acacagaaca acaagccaag cacaaaacca  
121 cgtccaaaaa atccacaaa aaaagatgat taccatttg aagtgtcaa cttgttccc  
181 ttagtatat gtggcaacaa tcaactctgc aaatccattt gcaaaacaat accaagcaat  
241 aaaccaaga aaaaaccaac tacaaaaccc acaaacaaac cacctaccaa aaccacaaac  
301 aaaagagacc ccaaacact agccaaaaca ccgaaaaaag aaaccacat taaccaaca  
361 aaaaaaccaa ccccaagac cacagaaaga gacaccagca cccacaate cactgtgetc  
421 gacacaacca catcaaaaca cacagaaaga gacaccagca cccacaate cattgcgctt  
481 gacacaacca catcaaaaca cacaaccaa cagcaatctc cctactcaac cacccccgaa  
541 aacacacaca actccacaca aacaccaca gcatccgagc cctccacatc aaattctacc  
601 caaaaactcc agtcatatgc ttag

//

LOCUS KY328136 603 bp cRNA linear VRL 13-DEC-2016

DEFINITION Human respiratory syncytial virus B isolate B/TH-CU448/2012  
attachment glycoprotein gene, partial cds.

ACCESSION KY328136

VERSION KY328136

KEYWORDS .

SOURCE Human respiratory syncytial virus B

ORGANISM Human respiratory syncytial virus B

Viruses; ssRNA viruses; ssRNA negative-strand viruses;  
Mononegavirales; Pneumoviridae; Orthopneumovirus.

REFERENCE 1 (bases 1 to 603)

AUTHORS Thongpan,I., Mauleekoonphairoj,J., Vichiwattana,P., Korkong,S.,  
Vongpunsawad,S. and Poovorawan,Y.

TITLE Molecular Characterization of Respiratory Syncytial Virus in  
Thailand, 2012-2015

JOURNAL Unpublished

REFERENCE 2 (bases 1 to 603)

AUTHORS Thongpan,I., Mauleekoonphairoj,J., Vichiwattana,P., Korkong,S.,  
Vongpunsawad,S. and Poovorawan,Y.

TITLE Direct Submission

JOURNAL Submitted (13-DEC-2016) Department of Pediatrics, Center of  
Excellence in Clinical Virology, Faculty of Medicine, Chulalongkorn  
University, Bangkok 10330, Thailand

COMMENT ##Assembly-Data-START##

Assembly Method :: DNASTAR-Lasergene v. 6  
Sequencing Technology :: Sanger dideoxy sequencing  
##Assembly-Data-END##

FEATURES Location/Qualifiers

source 1..603  
/organism="Human respiratory syncytial virus B"  
/mol\_type="viral cRNA"  
/isolate="B/TH-CU448/2012"  
/host="Homo sapiens"  
/db\_xref="taxon:208895"  
/country="Thailand"  
/collection\_date="01-Sep-2012"  
/note="group: B"  
CDS <1..603  
/note="G protein"  
/codon\_start=1  
/product="attachment glycoprotein"  
/protein\_id="APY20477"

/translation="IHTNSATISPNTKSETHHTTAQTKGRTSTPTQNNKPSTKPRPKN  
PPKKDDYHFEVFNFVPCISCGNNQLCKSICKTIPSNKPKKKPTTKPTNKPTKTTNKR  
DPKTLAKTPKKETTINPTKKPTKTTTERDTSTPQSTVLDTTTTSKNTERDTSTSQSTAL  
DTTTSKHTTQQQSLYSTTPENTPNSTQTPTASELSTSNST"

ORIGIN

1 atccacacaa actcagccac aatatacct aatacaaaat cagaacacaca ccatacaaca  
61 gcacaaacca aaggcagaac ctctactcca acacagaaca acaagccaag cacaaaacca  
121 cgtccaaaaa atccacaaa aaaagatgat taccatttg aagtgtcaa ctctgtccc  
181 tgtagtatat gtggcaacaa tcaactctgc aaatccattt gcaaaacaat accaagcaat  
241 aaaccaaaaga aaaaaccaac tacaaaaccc acaaaacaac caccaccaa aaccacaac  
301 aaaagagacc ccaaaacact agccaaaaca ccgaaaaaag aaaccacat caaccaaca  
361 aaaaaaccaa ccccaagac cacagaaaga gacaccagca cccacaate cactgtgctc  
421 gacacaacca catcaaaaaa cacagaaaga gacaccagca ctcacaate caccgcgctt  
481 gacacaacca catcaaaaaa cacaaccaa cagcaatctc tctactcaac cccccgaa  
541 aacacacca actccacaca aacaccaca geatccgagc tctccacac aaattccacc  
601 taa

//

LOCUS KY328137 624 bp cRNA linear VRL 13-DEC-2016  
DEFINITION Human respiratory syncytial virus B isolate TH-CU/B10997/2014  
attachment glycoprotein gene, partial cds.

ACCESSION KY328137

VERSION KY328137

KEYWORDS .

SOURCE Human respiratory syncytial virus B

ORGANISM Human respiratory syncytial virus B

Viruses; ssRNA viruses; ssRNA negative-strand viruses;  
Mononegavirales; Pneumoviridae; Orthopneumovirus.

REFERENCE 1 (bases 1 to 624)

AUTHORS Thongpan,I., Mauleekoonphairoj,J., Vichiwattana,P., Korkong,S.,  
Vongpunsawad,S. and Poovorawan,Y.

TITLE Molecular Characterization of Respiratory Syncytial Virus in  
Thailand, 2012-2015

JOURNAL Unpublished

REFERENCE 2 (bases 1 to 624)

AUTHORS Thongpan,I., Mauleekoonphairoj,J., Vichiwattana,P., Korkong,S.,  
Vongpunsawad,S. and Poovorawan,Y.

TITLE Direct Submission

JOURNAL Submitted (13-DEC-2016) Department of Pediatrics, Center of  
Excellence in Clinical Virology, Faculty of Medicine, Chulalongkorn  
University, Bangkok 10330, Thailand

COMMENT ##Assembly-Data-START##

Assembly Method :: DNASTAR-Lasergene v. 6  
Sequencing Technology :: Sanger dideoxy sequencing  
##Assembly-Data-END##

FEATURES Location/Qualifiers

source 1..624  
/organism="Human respiratory syncytial virus B"  
/mol\_type="viral cRNA"  
/isolate="TH-CU/B10997/2014"  
/host="Homo sapiens"  
/db\_xref="taxon:208895"  
/country="Thailand"  
/collection\_date="16-Sep-2014"  
/note="group: B"

CDS <1..624  
/note="G protein"  
/codon\_start=1  
/product="attachment glycoprotein"  
/protein\_id="APY20478"  
/translation="IHTNSATISPNTKSETHHTTAQTKGRTSTPTQNNKPSTKPRPKN  
PPKKDDYHFEVFNFPVCSICGNNQLCKSICKTIPSNKPKKKPTTKPTNKPPTKTTNKR  
DPKTLAKTPKKETTINPTKKPTPKTTERDTSTPQSTVLDTTTTSKHTERDTRTPQSTAL  
DKTTSKHITQQQLHSTTPENTPNSTQTPTASEPSTSNSTQKLQSYA"

ORIGIN

1 atccacacaa actcagccac aatatacct aatacaaat cagaaacaca ccatacaaca  
61 gcacaaacca aaggcagaac ctctactcca acacagaaca acaagccaag cacaaaaacca  
121 cgtccaaaaa atccacaaa aaaagatgat taccatttg aagtgtcaa ctctgtccc  
181 tgtagtatat gtggcaacaa tcaactctgc aatccattt gcaaaacaat accaagcaat  
241 aaaccaaaaga aaaaaccaac cactaaacct acaaacaaac cacctaccaa aaccacaaac  
301 aaaagagacc ccaaaact agccaaaaca ccgaaaaaag aaaccacat taaccaaca  
361 aaaaaaccaa cccaagac cacagaaga gacaccagca cccacaatc cactgtgett  
421 gacacaacca catcaaaaca cacagaaaga gacaccagaa cccacaatc cactgcgett  
481 gacaaaacca catcaaaaca cataaccaa cagcaatctc tccactcaac cacccccgaa  
541 aacacacca actccacaca aacaccaca gcatccgagc cctccacatc aaattccacc  
601 caaaaactcc agtcatatgc ttag

//

LOCUS KY328138 624 bp cRNA linear VRL 13-DEC-2016  
DEFINITION Human respiratory syncytial virus B isolate TH-CU/C5217/2014  
attachment glycoprotein gene, partial cds.

ACCESSION KY328138

VERSION KY328138

KEYWORDS .

SOURCE Human respiratory syncytial virus B

ORGANISM Human respiratory syncytial virus B

Viruses; ssRNA viruses; ssRNA negative-strand viruses;  
Mononegavirales; Pneumoviridae; Orthopneumovirus.

REFERENCE 1 (bases 1 to 624)

AUTHORS Thongpan,I., Mauleekoonphairoj,J., Vichiwattana,P., Korkong,S.,  
Vongpunsawad,S. and Poovorawan,Y.

TITLE Molecular Characterization of Respiratory Syncytial Virus in  
Thailand, 2012-2015

JOURNAL Unpublished

REFERENCE 2 (bases 1 to 624)

AUTHORS Thongpan,I., Mauleekoonphairoj,J., Vichiwattana,P., Korkong,S.,  
Vongpunsawad,S. and Poovorawan,Y.

TITLE Direct Submission

JOURNAL Submitted (13-DEC-2016) Department of Pediatrics, Center of  
Excellence in Clinical Virology, Faculty of Medicine, Chulalongkorn  
University, Bangkok 10330, Thailand

COMMENT ##Assembly-Data-START##

Assembly Method :: DNASTAR-Lasergene v. 6  
Sequencing Technology :: Sanger dideoxy sequencing  
##Assembly-Data-END##

FEATURES Location/Qualifiers

source 1..624  
/organism="Human respiratory syncytial virus B"  
/mol\_type="viral cRNA"  
/isolate="TH-CU/C5217/2014"

/host="Homo sapiens"  
/db\_xref="taxon:208895"  
/country="Thailand"  
/collection\_date="01-Nov-2014"  
/note="group: B"  
CDS <1..624  
/note="G protein"  
/codon\_start=1  
/product="attachment glycoprotein"  
/protein\_id="APY20479"  
/translation="IHTNSATISPNTKSETHHTTAQTKGRTSTPTQNNKPSTKPRPKN  
PPKKDDYHFEVFNFPVPCISCGNNQLCKSICKTIPSNKPKKKPTTKPTNKPTKTTNKR  
DPKTLAKTPKKETTINPTKKPTPKTTERDSTPQSTVLDTTTSKHTERDTRTPQSTAL  
DKTTSKHITQQQLHSTTPENTPNSTQTPTASEPSTSNSTQKLQSYA"

ORIGIN

1 atccacacaa actcagccac aatatacact aatacaaat cagaacacaca ccatacaaca  
61 gcacaaacca aaggcagaac ctctactcca acacagaaca acaagccaag cacaaaacca  
121 cgtccaaaaa atccacaaa aaaagatgat taccatttg aagtgtcaa ctctgtccc  
181 ttagtatat gtggcaacaa tcaactctgc aatccattt gaaaaacaat accaagcaat  
241 aaaccaaaga aaaaaccaac cactaaacc acaaacaaac cacctaccaa aaccacaaac  
301 aaaagagacc caaaacact agccaaaaca ccgaaaaag aaaccacat taaccaaca  
361 aaaaaacaa ccccaagac cacagaaaga gacaccagca cccacaate cactgtgctt  
421 gacacaacca catcaaaaca cacagaaaga gacaccagaa cccacaate cactgtgctt  
481 gacaaaacca catcaaaaca cataaccaa cagcaatctc tccactcaac ccccccgaa  
541 aacacacca actccacaca aacaccaca geatccgagc cctccacatc aattecacc  
601 caaaaactcc agtcatatgc ttag

//

LOCUS KY328139 624 bp cRNA linear VRL 13-DEC-2016

DEFINITION Human respiratory syncytial virus B isolate TH-CU431/2012  
attachment glycoprotein gene, partial cds.

ACCESSION KY328139

VERSION KY328139

KEYWORDS .

SOURCE Human respiratory syncytial virus B

ORGANISM Human respiratory syncytial virus B

Viruses; ssRNA viruses; ssRNA negative-strand viruses;  
Mononegavirales; Pneumoviridae; Orthopneumovirus.

REFERENCE 1 (bases 1 to 624)

AUTHORS Thongpan,I., Mauleekoonphairoj,J., Vichiwattana,P., Korkong,S.,  
Vongpunsawad,S. and Poovorawan,Y.

TITLE Molecular Characterization of Respiratory Syncytial Virus in  
Thailand, 2012-2015

JOURNAL Unpublished

REFERENCE 2 (bases 1 to 624)

AUTHORS Thongpan,I., Mauleekoonphairoj,J., Vichiwattana,P., Korkong,S.,  
Vongpunsawad,S. and Poovorawan,Y.

TITLE Direct Submission

JOURNAL Submitted (13-DEC-2016) Department of Pediatrics, Center of  
Excellence in Clinical Virology, Faculty of Medicine, Chulalongkorn  
University, Bangkok 10330, Thailand

COMMENT ##Assembly-Data-START##

Assembly Method :: DNASTAR-Lasergene v. 6  
Sequencing Technology :: Sanger dideoxy sequencing  
##Assembly-Data-END##

FEATURES Location/Qualifiers

source 1..624  
/organism="Human respiratory syncytial virus B"  
/mol\_type="viral cRNA"  
/isolate="TH-CU431/2012"  
/host="Homo sapiens"  
/db\_xref="taxon:208895"  
/country="Thailand"  
/collection\_date="01-Aug-2012"  
/note="group: B"

CDS <1..624  
/note="G protein"  
/codon\_start=1  
/product="attachment glycoprotein"  
/protein\_id="APY20480"  
/translation="IHTNSATISPNTKSETHHTTAQTKGRTSTPTQNNKPSTKPRPKN  
PPKKDDYHFEVFNFPVCSICGNNQLCKSICKTIPSNPKPKKPTIKPTNKPPTKTTNKR  
DPKTLAKTPKKETTINPTKKPTPKTTERDTSTPQSTVLDTTTTPKHTERDTSTPQSI  
ALDTTTSKHTIQQLSYSTTLENTPNSTQTPTASEPSTSNSTQKLQSYA"

ORIGIN

1 atccacacaa actcagccac aatatacct aatacaaat cagaacaca ccatacaaca  
61 gcacaaacca aaggcagaac ctctactcca acacagaaca acaagccaag cacaaaacca  
121 cgtccaaaaa atccacaaa aaaagatgat taccatttg aagtgtcaa cttegtccc  
181 tgtagtatat gtggcaacaa tcaactctgc aaatccattt gcaaaacaat accaagcaat  
241 aaaccaaaga aaaagccaac tataaaaccc acaacaacac caccaccaa aaccacaac  
301 aaaagagacc ctaaaacact agccaaaaca cggaaaaag aaaccacat taaccaaca  
361 aaaaaaccaa ccccaagac cacagaaaga gacaccagca cccacaate cactgtgctc  
421 gacacaacca caccaaaaca cacagaaaga gacaccagca cccacaate cattgcgctt  
481 gacacaacca catcaaaaca cacaatcaa cagcaatccc tctactcaac caccctgaa  
541 aacacaccaa actccacaca aacaccaca gcatccgagc cctccacatc aaattccacc  
601 caaaaactcc agtcatatgc ttag

//  
LOCUS KY328140 603 bp cRNA linear VRL 13-DEC-2016

DEFINITION Human respiratory syncytial virus B isolate CU\_C5157/2014  
attachment glycoprotein gene, partial cds.

ACCESSION KY328140

VERSION KY328140

KEYWORDS .

SOURCE Human respiratory syncytial virus B

ORGANISM Human respiratory syncytial virus B  
Viruses; ssRNA viruses; ssRNA negative-strand viruses;  
Mononegavirales; Pneumoviridae; Orthopneumovirus.

REFERENCE 1 (bases 1 to 603)

AUTHORS Thongpan,I., Mauleekoonphairoj,J., Vichiwattana,P., Korkong,S.,  
Vongpunsawad,S. and Poovorawan,Y.

TITLE Molecular Characterization of Respiratory Syncytial Virus in  
Thailand, 2012-2015

JOURNAL Unpublished

REFERENCE 2 (bases 1 to 603)

AUTHORS Thongpan,I., Mauleekoonphairoj,J., Vichiwattana,P., Korkong,S.,  
Vongpunsawad,S. and Poovorawan,Y.

TITLE Direct Submission

JOURNAL Submitted (13-DEC-2016) Department of Pediatrics, Center of  
Excellence in Clinical Virology, Faculty of Medicine, Chulalongkorn

University, Bangkok 10330, Thailand

COMMENT ##Assembly-Data-START##

Assembly Method :: DNASTAR-Lasergene v. 6  
Sequencing Technology :: Sanger dideoxy sequencing  
##Assembly-Data-END##

FEATURES Location/Qualifiers

source 1..603  
/organism="Human respiratory syncytial virus B"  
/mol\_type="viral cRNA"  
/isolate="CU\_C5157/2014"  
/host="Homo sapiens"  
/db\_xref="taxon:208895"  
/country="Thailand"  
/collection\_date="01-Oct-2014"  
/note="group: B"

CDS <1..603  
/note="G protein"  
/codon\_start=1  
/product="attachment glycoprotein"  
/protein\_id="APY20481"  
/translation="IHTNSATISPNTKSETHHTTAQTKGRTSTPTQNNKPSTKPRPKN  
PPKKDDYHFEVFNFPVPCISGNNQLCKSICKTIPSNKPKKKPTIKPTNKPPTKTTNKR  
DPKTLAKTPKKETTINPTKKPTPKTTERDTSTPQSTVLNTTTTSKHTERDTSTSQSIAL  
DTTTSKHTIQHQLSYSTTLNLTNSTQTPIASEPSTSNST"

ORIGIN

1 atccacaaa actcagccac aatatcacc aatacaaat cagaaacaca ccatacaaca  
61 gcacaaacca aaggcgaac ctccactcca acacagaaca acaagccaag cacaaaacca  
121 cgtccaaaaa atccacaaa aaaagatgat taccatttg aagtgtcaa ctctgtccc  
181 tgtagtatat gtggcaacaa tcaactctgc aaatccattt gcaaaacaat accaagcaat  
241 aaaccaaaaga aaaaccaac tataaaacc acaaaacaac caccaccaa aaccacaaac  
301 aaaagagacc ctaaaact agcctaaaaca cggaaaaag aaaccacat taaccaaca  
361 aaaaaaccaa ctccaagac cacagaaaga gacaccagca cccacaate cactgtgctc  
421 aacacaacca catcaaaaca cacagaaaga gacaccagca ctcacaate cattgcgctt  
481 gacacaacca catcaaaaca cacaatcaa catcaatccc tctactcaac caccctcgaa  
541 aacacactaa actccacaca aacaccata gcatccgagc cctccacatc aattecacc  
601 taa

//

LOCUS KY328141 624 bp cRNA linear VRL 13-DEC-2016

DEFINITION Human respiratory syncytial virus B isolate TH-CU/C6141/2015  
attachment glycoprotein gene, partial cds.

ACCESSION KY328141

VERSION KY328141

KEYWORDS .

SOURCE Human respiratory syncytial virus B

ORGANISM Human respiratory syncytial virus B

Viruses; ssRNA viruses; ssRNA negative-strand viruses;  
Mononegavirales; Pneumoviridae; Orthopneumovirus.

REFERENCE 1 (bases 1 to 624)

AUTHORS Thongpan,I., Mauleekoonphairoj,J., Vichiwattana,P., Korkong,S.,  
Vongpunsawad,S. and Poovorawan,Y.

TITLE Molecular Characterization of Respiratory Syncytial Virus in  
Thailand, 2012-2015

JOURNAL Unpublished

REFERENCE 2 (bases 1 to 624)

AUTHORS Thongpan,I., Mauleekoonphairoj,J., Vichiwattana,P., Korkong,S.,  
Vongpunsawad,S. and Poovorawan,Y.

TITLE Direct Submission

JOURNAL Submitted (13-DEC-2016) Department of Pediatrics, Center of  
Excellence in Clinical Virology, Faculty of Medicine, Chulalongkorn  
University, Bangkok 10330, Thailand

COMMENT ##Assembly-Data-START##

Assembly Method :: DNASTAR-Lasergene v. 6  
Sequencing Technology :: Sanger dideoxy sequencing  
##Assembly-Data-END##

FEATURES Location/Qualifiers

source 1..624  
/organism="Human respiratory syncytial virus B"  
/mol\_type="viral cRNA"  
/isolate="TH-CU/C6141/2015"  
/host="Homo sapiens"  
/db\_xref="taxon:208895"  
/country="Thailand"  
/collection\_date="08-Oct-2015"  
/note="group: B"

CDS <1..624  
/note="G protein"  
/codon\_start=1  
/product="attachment glycoprotein"  
/protein\_id="APY20482"  
/translation="IHTNSATISPNTKSETHHTTAQTKGTTSTPTQNNKPSTKPRPKN  
PPKKDDYHFEVFNFPVCSICGNNQLCKSICKTIPSNKPKKPTTKPTNKPPTKTTNKR  
DPKTLAKTPKKENTINPTKKPTKPTTERDTSTPQSTVLDITTSKHTERDTSTSQSIAL  
DTTTSKHTTQQQSLYSTTPENTPNSTQTPTASEPSTSNSTQRLQSYA"

ORIGIN

1 atccacaaa actcagccac aatataccac aatacaaaat cagaacacac ccatacaaca  
61 gcacaaacca aaggcacaac ctctactcca acacagaaca acaagccaag cacaaaacca  
121 cgtccaaaaa atccacaaa aaaagatgat taccatttg aagtgtcaa cttgtgcc  
181 ttagtatat gtggcaaca tcaactctgc aatccattt gcaaaacaat accaagcaat  
241 aaaccaaaaga aaaaaccaac taaaaaaccc acaaacaaac cacctaccaa aaccacaaac  
301 aaaagagacc caaaacact agccaaaaca ccgaaaaaag aaaacacat taaccaaca  
361 aaaaaaccaa cccaagac tacagaaaga gacacaagca cccacaatc cactgttctc  
421 gacataacca catcaaaaca cacagaaaga gacaccagca ctcacaatc cattgcactt  
481 gacacaacca catcaaaaca cacaacca cagcaatctc tctactcaac cacccccgaa  
541 aacacacca actccacaca aacaccaca gcatccgagc cctccacatc aaactctacc  
601 caaagactcc agtcatatgc ctac

//

LOCUS KY328142 603 bp cRNA linear VRL 13-DEC-2016

DEFINITION Human respiratory syncytial virus B isolate TH-CU/C5097/2015  
attachment glycoprotein gene, partial cds.

ACCESSION KY328142

VERSION KY328142

KEYWORDS .

SOURCE Human respiratory syncytial virus B

ORGANISM Human respiratory syncytial virus B  
Viruses; ssRNA viruses; ssRNA negative-strand viruses;  
Mononegavirales; Pneumoviridae; Orthopneumovirus.

REFERENCE 1 (bases 1 to 603)

AUTHORS Thongpan,I., Mauleekoonphairoj,J., Vichiwattana,P., Korkong,S.,

Vongpunsawad,S. and Poovorawan,Y.  
**TITLE** Molecular Characterization of Respiratory Syncytial Virus in Thailand, 2012-2015  
**JOURNAL** Unpublished  
**REFERENCE** 2 (bases 1 to 603)  
**AUTHORS** Thongpan,I., Mauleekoonphairoj,J., Vichiwattana,P., Korkong,S., Vongpunsawad,S. and Poovorawan,Y.  
**TITLE** Direct Submission  
**JOURNAL** Submitted (13-DEC-2016) Department of Pediatrics, Center of Excellence in Clinical Virology, Faculty of Medicine, Chulalongkorn University, Bangkok 10330, Thailand  
**COMMENT** ##Assembly-Data-START##  
Assembly Method :: DNASTAR-Lasergene v. 6  
Sequencing Technology :: Sanger dideoxy sequencing  
##Assembly-Data-END##  
**FEATURES** Location/Qualifiers  
source 1..603  
/organism="Human respiratory syncytial virus B"  
/mol\_type="viral cRNA"  
/isolate="TH-CU/C5097/2015"  
/host="Homo sapiens"  
/db\_xref="taxon:208895"  
/country="Thailand"  
/collection\_date="01-Sep-2015"  
/note="group: B"  
CDS <1..603  
/note="G protein"  
/codon\_start=1  
/product="attachment glycoprotein"  
/protein\_id="APY20483"  
/translation="IHTNSATISPNTKSETHHTTAQTKGRTSTPTQNNKPSTKPRPKN  
PPKKDDYHFEVFNFPVPCISICGNNQLCKSICKTIPSNKPKKKPTIKPTNKPTKTTNKR  
DPKTPAKTPKKDTTTTNPTKKPTKTTTERDTSTPQSTVLDTTTTSKHTERDTSTSQSIVL  
DTTTSKHTIQQLHSTTPGNTPNSTQTPTASEPSTSNST"  
**ORIGIN**  
1 atccacacaa atcagccac aatatacct aatacaaaat cagaaacaca ccatacaaca  
61 gcacaaacca aaggcagaac ctctactcca acacagaaca acaaaccaag cacaaaacca  
121 cgtccaaaaa atccacaaa aaaagatgat taccatttg aagtgtcaa ctctgtccc  
181 tgcagtatat gtggcaacaa tcaactctgc aaatccattt gcaaaacaat accaagcaat  
241 aaaccaaaga aaaaaccaac cataaaacca acaaacaaaa caccaccaa aaccacaaac  
301 aaaagagacc caaaacacc agctaaaaca ccgaaaaaag acaccaccac caaccaaca  
361 aaaaaacca ccccaaac cacagaaaga gacaccagca cccacaatc cactgtgctc  
421 gacacaacca catcaaaaca cacagaaaga gacaccagca ctcacaatc tattgtgctc  
481 gacacaacca catcaaaaca cacaatcaa cagcaatccc tccactcaac cacccecgga  
541 aacacacca actccacaca gacaccaca geatccgagc ctcacatc aaatccacc  
601 taa  
//  
**LOCUS** KY328143 603 bp cRNA linear VRL 13-DEC-2016  
**DEFINITION** Human respiratory syncytial virus B isolate TH-CU/C5159/2015  
attachment glycoprotein gene, partial cds.  
**ACCESSION** KY328143  
**VERSION** KY328143  
**KEYWORDS** .  
**SOURCE** Human respiratory syncytial virus B



ORGANISM Human respiratory syncytial virus B  
Viruses; ssRNA viruses; ssRNA negative-strand viruses;  
Mononegavirales; Pneumoviridae; Orthopneumovirus.

REFERENCE 1 (bases 1 to 603)

AUTHORS Thongpan,I., Mauleekoonphairoj,J., Vichiwattana,P., Korkong,S.,  
Vongpunsawad,S. and Poovorawan,Y.

TITLE Molecular Characterization of Respiratory Syncytial Virus in  
Thailand, 2012-2015

JOURNAL Unpublished

REFERENCE 2 (bases 1 to 603)

AUTHORS Thongpan,I., Mauleekoonphairoj,J., Vichiwattana,P., Korkong,S.,  
Vongpunsawad,S. and Poovorawan,Y.

TITLE Direct Submission

JOURNAL Submitted (13-DEC-2016) Department of Pediatrics, Center of  
Excellence in Clinical Virology, Faculty of Medicine, Chulalongkorn  
University, Bangkok 10330, Thailand

COMMENT ##Assembly-Data-START##

Assembly Method :: DNASTAR-Lasergene v. 6  
Sequencing Technology :: Sanger dideoxy sequencing  
##Assembly-Data-END##

FEATURES Location/Qualifiers

source 1..603  
/organism="Human respiratory syncytial virus B"  
/mol\_type="viral cRNA"  
/isolate="TH-CU/C5159/2015"  
/host="Homo sapiens"  
/db\_xref="taxon:208895"  
/country="Thailand"  
/collection\_date="08-Oct-2015"  
/note="group: B"

CDS <1..603  
/note="G protein"  
/codon\_start=1  
/product="attachment glycoprotein"  
/protein\_id="APY20484"  
/translation="IHTNSATISPNTKSETHHTTAQTKGRTSTPTQNNKPSTKPRPKN  
PPKKDDYHFEVFNFPVPCISCGNNQLCKSICKTIPSNKPKKPTIKPTNKPTKTNNKR  
DPKTPAKTPKKDTTTTNPTKPTKPTTTERDTSTPQSTVLDTTTTSKHTERDTSTSQSIVL  
TTTTSKHTIQQLHSTTPGNTPNSTQTPTASEPSTSNST"

ORIGIN

1 atccacaaa atcagccac aatatacct aatacaaat cagaaacaca ccatacaaca  
61 gcacaaacca aaggcgaac ctctactcca acacagaaca acaaaccaag cacaaaacca  
121 cgtcAAAAAA atccacaaa aaaagatgat taccatttg aagtgtca cctcgttccc  
181 tgcagtatat gtggcaacaa tcaactctgc aaatccattt gcaaaaacaat accaagcaat  
241 aaaccaaaaga aaaaaccaac cataaaacca acaaacaaaa caccaccaa aaccacaaac  
301 aaaagagacc caaaaacacc agctaaaaca cgaaaaaag acaccaccac caaccaaca  
361 aaaaaaccaa ccccaaaaac cacagaaaga gacaccagca cccacaate cactgtgctc  
421 gacacaacca catcaaaaca cacagaaaga gacaccagca cctcacaatc tattgtgctc  
481 gacacaacca catcaaaaca cacaatcaa cagcaatccc tcaactcaac cacccccgga  
541 aacacacca actccacaca gacaccaca gcatccgagc cctccacatc aattccacc  
601 taa

//

LOCUS KY328144 603 bp cRNA linear VRL 13-DEC-2016

DEFINITION Human respiratory syncytial virus B isolate TH-CU/C5063/2015

attachment glycoprotein gene, partial cds.  
 ACCESSION KY328144  
 VERSION KY328144  
 KEYWORDS .  
 SOURCE Human respiratory syncytial virus B  
 ORGANISM Human respiratory syncytial virus B  
 Viruses; ssRNA viruses; ssRNA negative-strand viruses;  
 Mononegavirales; Pneumoviridae; Orthopneumovirus.  
 REFERENCE 1 (bases 1 to 603)  
 AUTHORS Thongpan,I., Mauleekoonphairoj,J., Vichiwattana,P., Korkong,S.,  
 Vongpunsawad,S. and Poovorawan,Y.  
 TITLE Molecular Characterization of Respiratory Syncytial Virus in  
 Thailand, 2012-2015  
 JOURNAL Unpublished  
 REFERENCE 2 (bases 1 to 603)  
 AUTHORS Thongpan,I., Mauleekoonphairoj,J., Vichiwattana,P., Korkong,S.,  
 Vongpunsawad,S. and Poovorawan,Y.  
 TITLE Direct Submission  
 JOURNAL Submitted (13-DEC-2016) Department of Pediatrics, Center of  
 Excellence in Clinical Virology, Faculty of Medicine, Chulalongkorn  
 University, Bangkok 10330, Thailand  
 COMMENT ##Assembly-Data-START##  
 Assembly Method :: DNASTAR-Lasergene v. 6  
 Sequencing Technology :: Sanger dideoxy sequencing  
 ##Assembly-Data-END##

FEATURES Location/Qualifiers  
 source 1..603  
 /organism="Human respiratory syncytial virus B"  
 /mol\_type="viral cRNA"  
 /isolate="TH-CU/C5063/2015"  
 /host="Homo sapiens"  
 /db\_xref="taxon:208895"  
 /country="Thailand"  
 /collection\_date="10-Sep-2015"  
 /note="group: B"  
 CDS <1..603  
 /note="G protein"  
 /codon\_start=1  
 /product="attachment glycoprotein"  
 /protein\_id="APY20485"  
 /translation="IHTNSATISPNTKSETHHTTAQTKGRTSTPTQNNKPSTKPRPKN  
 PPKKDDYHFEVFNFPVPCISGNNQLCKSICKTIPSNPKPKKPTIKPTNKPTKTTNKR  
 DPKTPAKTPKKDTTTTNPTKKPTKPTTERDTSTPQSTVLDTTTSKHTERDTSTSQSIVL  
 DTTTSKHTIQQLHSTTPGNTPNSTQTPTASEPSTSNST"

ORIGIN  
 1 atccacaaa atcagccac aatatacct aatacaaat cagaaacaca ccatacaaca  
 61 gcacaaacca aaggcagaac ctctactcca acacagaaca acaaaccaag cacaaaacca  
 121 cgtccaaaaa atccacaaa aaaagatgat taccatttg aagtgtcaa ctctgtccc  
 181 tgcagtatat gtggcaaca tcaactctgc aaatccattt gcaaaacaat accaagcaat  
 241 aaaccaaaga aaaaaccaac cataaaacca acaaaacaaa caccaccaa aaccacaac  
 301 aaaagagacc caaaaacacc agctaaaaca ccgaaaaaag acaccaccac caaccaaca  
 361 aaaaaaccaa ccccaaaaac cacagaaaga gacaccagca cccacaate cactgtgctc  
 421 gacacaacca catcaaaaca cacagaaaga gacaccagca ctcacaate tattgtgctc  
 481 gacacaacca catcaaaaca cacaatcca cagcaatccc tcaactcaac caccgccgga

541 aacacacca actccacaca gacaccaca gcatccgagc cctccacatc aaatccacc  
601 taa

//

LOCUS KY328145 624 bp cRNA linear VRL 13-DEC-2016

DEFINITION Human respiratory syncytial virus B isolate TH-CU402/2012  
attachment glycoprotein gene, partial cds.

ACCESSION KY328145

VERSION KY328145

KEYWORDS .

SOURCE Human respiratory syncytial virus B

ORGANISM Human respiratory syncytial virus B

Viruses; ssRNA viruses; ssRNA negative-strand viruses;  
Mononegavirales; Pneumoviridae; Orthopneumovirus.

REFERENCE 1 (bases 1 to 624)

AUTHORS Thongpan,I., Mauleekoonphairoj,J., Vichiwattana,P., Korkong,S.,  
Vongpunsawad,S. and Poovorawan,Y.

TITLE Molecular Characterization of Respiratory Syncytial Virus in  
Thailand, 2012-2015

JOURNAL Unpublished

REFERENCE 2 (bases 1 to 624)

AUTHORS Thongpan,I., Mauleekoonphairoj,J., Vichiwattana,P., Korkong,S.,  
Vongpunsawad,S. and Poovorawan,Y.

TITLE Direct Submission

JOURNAL Submitted (13-DEC-2016) Department of Pediatrics, Center of  
Excellence in Clinical Virology, Faculty of Medicine, Chulalongkorn  
University, Bangkok 10330, Thailand

COMMENT ##Assembly-Data-START##

Assembly Method :: DNASTAR-Lasergene v. 6  
Sequencing Technology :: Sanger dideoxy sequencing  
##Assembly-Data-END##

FEATURES Location/Qualifiers

source 1..624

/organism="Human respiratory syncytial virus B"  
/mol\_type="viral cRNA"  
/isolate="TH-CU402/2012"  
/host="Homo sapiens"  
/db\_xref="taxon:208895"  
/country="Thailand"  
/collection\_date="16-Aug-2012"  
/note="group: B"

CDS <1..624

/note="G protein"  
/codon\_start=1  
/product="attachment glycoprotein"  
/protein\_id="APY20486"  
/translation="IHTNSATISPSTKSETHHTTAQTKGRTSTPTQNNKPSTKPRPKN  
PPKKDDYHFEVFNFPVCSICGNNQLCKSICKTIPSNKPKKKPTIKPTNKTPTKTTNKR  
DPKTPAKTPKKDTTTTNPTKKPTPKTTERDTSTPQSTVLDTTTTSKHTERDTSTSQSIVL  
DTTTSKHTIQQLHSTTPGNTPNSTQTPTASEPSTSNSTQKLQSYA"

ORIGIN

1 atccacacaa actcagccac aatataccac agtacaaaat cagaaacaca ccatacaaca  
61 gcacaaacca aaggcagaac ctccactcca acacagaaca acaaaccaag cacaaaacca  
121 cgtccaaaaa atccacaaa aaaagatgat taccatttg aagtgttcaa ctctgtccc  
181 tgtagtatat gtggcaacaa tcaactctgc aatccatct gcaaaacaat accaagcaat

241 aaaccaaga aaaaccaac cataaaacca acaaacaaaa caccaccaa aaccacaac  
301 aaaagagacc caaaaacacc agccaaaaca cgaaaaaag acaccaccac caaccaaca  
361 aaaaaaccaa cccccaagac cacagaaaga gacaccagca cccacaatc cactgtgctc  
421 gacacaacca catcaaaaca cacagaaaga gacaccagca cctcacaatc tattgtgctc  
481 gacacaacca catcaaaaca cacaatcaa cagcaatccc tccactcaac cacccccgga  
541 aacacacca actccacaca gacaccaca gcatccgagc cctccacatc aaattccacc  
601 caaaaactcc agtcatatgc ttag

//

LOCUS KY328146 609 bp cRNA linear VRL 13-DEC-2016  
DEFINITION Human respiratory syncytial virus B isolate TH-CU/B12640/2015  
attachment glycoprotein gene, partial cds.

ACCESSION KY328146

VERSION KY328146

KEYWORDS .

SOURCE Human respiratory syncytial virus B

ORGANISM Human respiratory syncytial virus B

Viruses; ssRNA viruses; ssRNA negative-strand viruses;  
Mononegavirales; Pneumoviridae; Orthopneumovirus.

REFERENCE 1 (bases 1 to 609)

AUTHORS Thongpan,I., Mauleekoonphairoj,J., Vichiwattana,P., Korkong,S.,  
Vongpunsawad,S. and Poovorawan,Y.

TITLE Molecular Characterization of Respiratory Syncytial Virus in  
Thailand, 2012-2015

JOURNAL Unpublished

REFERENCE 2 (bases 1 to 609)

AUTHORS Thongpan,I., Mauleekoonphairoj,J., Vichiwattana,P., Korkong,S.,  
Vongpunsawad,S. and Poovorawan,Y.

TITLE Direct Submission

JOURNAL Submitted (13-DEC-2016) Department of Pediatrics, Center of  
Excellence in Clinical Virology, Faculty of Medicine, Chulalongkorn  
University, Bangkok 10330, Thailand

COMMENT ##Assembly-Data-START##

Assembly Method :: DNASTAR-Lasergene v. 6  
Sequencing Technology :: Sanger dideoxy sequencing  
##Assembly-Data-END##

FEATURES Location/Qualifiers

source 1..609

/organism="Human respiratory syncytial virus B"

/mol\_type="viral cRNA"

/isolate="TH-CU/B12640/2015"

/host="Homo sapiens"

/db\_xref="taxon:208895"

/country="Thailand"

/collection\_date="15-Aug-2015"

/note="group: B"

CDS <1..609

/note="G protein"

/codon\_start=1

/product="attachment glycoprotein"

/protein\_id="APY20487"

/translation="IYTSSATISPNTKSETHHTTAQTKSRITPTQNNKPSTKPRPKN

PPKKPKDDYHFEVFNFPVPCISCGNNQLCKSICKTIPSNKPKKKPTTKPTTKPPTKTTN

KRDPKTPVKPLKKENTINPTKKPTPRITERDTSTPQSTLLDTTASKHTEIDTSTPQSI

VLDTTTSKHTIRQQSLHSTTPENTPNPTQTPTASEPSTSNSY"

## ORIGIN

1 atctacaaa gctcagccac aatatacct aatacaaaa cagaaacaca ccatacaaca  
61 gcacaaacca aaagcagaat caccactcca acacagaaca acaagccaag cacaaaacca  
121 cgtccaaaa atccacaaa aaaacaaaa gatgattacc attttgaagt gtccaactc  
181 gtccctgta gtatatgtgg caacaatcaa ctctgcaaat ccatttgcaa aacaatacca  
241 agcaataaac caaagaaaa accaaccaca aaaccacaca ccaaaccacc cacaaaacc  
301 acaacaaaa gagacccaaa aacaccagtc aaaccactga aaaaagaaaa caccatcaac  
361 ccaacaaaa aaccaacccc caggatcaca gaaagagaca ccagcacccc acaatccact  
421 ctgctcgaca caaccgcatc aaaacacaca gaaatagaca ccagcacccc acaatccatt  
481 gtgctcgaca caaccacatc aaaacacaca atccgacagc aatccctcca ctaaccacc  
541 cccgaaaaa cacccaaccc cacacaaaca cccacagcat ccgagccctc cacatcaaac  
601 tctactaa

//

LOCUS KY328147 609 bp cRNA linear VRL 13-DEC-2016

DEFINITION Human respiratory syncytial virus B isolate TH-CU/C6143/2015  
attachment glycoprotein gene, partial cds.

ACCESSION KY328147

VERSION KY328147

KEYWORDS .

SOURCE Human respiratory syncytial virus B

ORGANISM Human respiratory syncytial virus B

Viruses; ssRNA viruses; ssRNA negative-strand viruses;  
Mononegavirales; Pneumoviridae; Orthopneumovirus.

REFERENCE 1 (bases 1 to 609)

AUTHORS Thongpan,I., Mauleekoonphairoj,J., Vichiwattana,P., Korkong,S.,  
Vongpunsawad,S. and Poovorawan,Y.

TITLE Molecular Characterization of Respiratory Syncytial Virus in  
Thailand, 2012-2015

JOURNAL Unpublished

REFERENCE 2 (bases 1 to 609)

AUTHORS Thongpan,I., Mauleekoonphairoj,J., Vichiwattana,P., Korkong,S.,  
Vongpunsawad,S. and Poovorawan,Y.

TITLE Direct Submission

JOURNAL Submitted (13-DEC-2016) Department of Pediatrics, Center of  
Excellence in Clinical Virology, Faculty of Medicine, Chulalongkorn  
University, Bangkok 10330, Thailand

COMMENT ##Assembly-Data-START##

Assembly Method :: DNASTAR-Lasergene v. 6  
Sequencing Technology :: Sanger dideoxy sequencing  
##Assembly-Data-END##

FEATURES Location/Qualifiers

source 1..609  
/organism="Human respiratory syncytial virus B"  
/mol\_type="viral cRNA"  
/isolate="TH-CU/C6143/2015"  
/host="Homo sapiens"  
/db\_xref="taxon:208895"  
/country="Thailand"  
/collection\_date="08-Oct-2015"  
/note="group: B"

CDS <1..609  
/note="G protein"  
/codon\_start=1  
/product="attachment glycoprotein"

/protein\_id="APY20488"  
/translation="IYTSSATISPNTKSETHHTTAQTKSRITPTQNNKPSTKPRPKN  
PPKKPKDDYHFEVFNFPVPCISICGNNQLCKSICKTIPSNKPKKKPTTKPTTKPPTKTTN  
KRDPKTPVKPLKKENTINPTKKPTPRITERDSTPQSTLLDTTASKHTEIDTSTPQSI  
VLDTTTSKHTRQQSLHSTTPENTPNPTQTPTASEPSTSNSY"

ORIGIN

1 atctacacaa gctcagccac aatatacct aatacaaat cagaaacaca ccatacaaca  
61 gcacaaacca aaagcagaat caccactcca acacagaaca acaagccaag cacaaaacca  
121 cgtccaaaaa atccacaaa aaaacaaaa gatgattacc atttgaagt gttcaactc  
181 gttcctgta gtatatgtg caacaatcaa ctctgcaa ctttgcaa aacaatcca  
241 agcaataaac caaagaaaa accaaccaca aaaccacaa ccaaacacc cacaaaacc  
301 acaacaaaa gagacccaaa aacaccagtc aaaccactga aaaaagaaaa caccatcaac  
361 ccaacaaaa aaccaacccc caggatcaca gaaagagaca ccagcacccc acaatccact  
421 ctgctcgaca caaccgcatc aaaacacaca gaaatagaca ccagcacccc acaatccatt  
481 gtgctcgaca caaccacatc aaaacacaca atccgacagc aatecctcca ctcaaccacc  
541 cccgaaaaca cacccaaccc cacacaaaca cccacagcat ccgagccctc cacatcaaac  
601 tctactaa

//

LOCUS KY328148 609 bp cRNA linear VRL 13-DEC-2016

DEFINITION Human respiratory syncytial virus B isolate TH-CU413/2012  
attachment glycoprotein gene, partial cds.

ACCESSION KY328148

VERSION KY328148

KEYWORDS .

SOURCE Human respiratory syncytial virus B

ORGANISM Human respiratory syncytial virus B

Viruses; ssRNA viruses; ssRNA negative-strand viruses;  
Mononegavirales; Pneumoviridae; Orthopneumovirus.

REFERENCE 1 (bases 1 to 609)

AUTHORS Thongpan,I., Mauleekoonphairoj,J., Vichiwattana,P., Korkong,S.,  
Vongpunsawad,S. and Poovorawan,Y.

TITLE Molecular Characterization of Respiratory Syncytial Virus in  
Thailand, 2012-2015

JOURNAL Unpublished

REFERENCE 2 (bases 1 to 609)

AUTHORS Thongpan,I., Mauleekoonphairoj,J., Vichiwattana,P., Korkong,S.,  
Vongpunsawad,S. and Poovorawan,Y.

TITLE Direct Submission

JOURNAL Submitted (13-DEC-2016) Department of Pediatrics, Center of  
Excellence in Clinical Virology, Faculty of Medicine, Chulalongkorn  
University, Bangkok 10330, Thailand

COMMENT ##Assembly-Data-START##

Assembly Method :: DNASTAR-Lasergene v. 6  
Sequencing Technology :: Sanger dideoxy sequencing  
##Assembly-Data-END##

FEATURES Location/Qualifiers

source 1..609

/organism="Human respiratory syncytial virus B"

/mol\_type="viral cRNA"

/isolate="TH-CU413/2012"

/host="Homo sapiens"

/db\_xref="taxon:208895"

/country="Thailand"

/collection\_date="16-Aug-2012"

CDS /note="group: B"  
<1..609  
/note="G protein"  
/codon\_start=1  
/product="attachment glycoprotein"  
/protein\_id="APY20489"  
/translation="IHTNSATISPNNKSETHHTTVQTKSRTTTTPTQNNKPSTKPRPKN  
PPKKPKDDYHFEVFNFVPCSI CGNNQLCKSICKTIPSNKPKKKPTTKPTNKPPTKTTN  
KRDPKTPAKPLKENTINPTKKPTPRITERDTSTPQSTLLDTTASKHTERDTSTLQST  
VLDTTTSKHTIRQQSLYSTTPENTPNSTQTPTASEPSTSNSN"

ORIGIN

1 atccacacaa actcagccac aatatcacct aataaaaaat cagaaacaca ccatacaaca  
61 gtacaaacca aaagcagaac caccactcca acacagaaca acaagccaag cacaaaacca  
121 cgtccaaaaa atccacaaa aaaacaaaa gatgattacc atttgaagt gtcaactc  
181 gttcctgta gtatatgtgg caacaatcaa ctctgcaaat ccattgcaa aacaatacca  
241 agcaataaac caaagaaaaa accaaccaca aaaccacaaa acaaaccacc taccaaaacc  
301 acaacaaaaa gagacccaaa aacaccagcc aaaccactga aaaaagaaaa taccatcaac  
361 ccaacaaaaa aaccaacccc caggatcaca gaaagagaca ccagcacccc acaatccact  
421 ttgetcgaca caaccgcatc aaaacacaca gaaagagaca ccagcacctc acaatccact  
481 gtgetcgaca caaccacatc aaaacacaca atccgacagc aatccctcta ctcaaccacc  
541 cccgaaaaca cacccaactc cacacaaaca cccacagcat ccgagccctc cacatcaaac  
601 tccaactaa

//
